# Supplementary material for: In vivo CRISPR screens reveal SCAF1 and USP15 as novel drivers of pancreatic cancer
Source: Research Square preprint supplement (doi:10.21203/rs.3.rs-2352174/v1), 2022-12-22
Supplement: Supplementary file 3 [file 7042ad59535f6d9d0a39c2a4.xlsx]

## Sheet: qRT-PCR Mouse primers
Gene name	Accession #	Forward Primers (5'-3')	Reverse Primers (5'-3')
Gapdh	NM_008084	CGGCCGCATCTTCTTGTG	CCGACCTTCACCATTTTGTCTAC
Rel-A	NM_009045.5	GCCTCTGGCGAATGGCTTTA	GCGCCCCTCGCATTTATAGC
Rel-B	NM_009046.2	ACGGTCTCCAGGACCACAGA	TCACTCAGCTGTGTCCCGTC
Traf-1	NM_009421.4	TTTCCTTGAGGGAGGAGCGAT	TTCTCCCATATCCACTCTCTCT
Cxcl2	NM_009140	CATCCAGAGCTTGAGTGTGACG	GGCTTCAGGGTCAAGGCAAACT
Cxcl3	NM_203320	TGAGACCATCCAGAGCTTGACG	CCTTGGGGGTTGAGGCAAACTT
Nfkb1	NM_008689	GCTGCCAAAGAAGGACACGACA	GGCAGGCTATTGCTCATCACAG
Nfkb2	NM_019408	TGCTGATGGCACAGGACGAGAA	GTTGATGACGCCGAGGTACTGA
Ppib	NM_011149.2	CAACGATAAGAAGAAGGGACCTAAA	CGTCCTACAGATTCATCTCCAATTT
Serpine1	NM_008871	CCTGGTGGACATCTTCCAGGAGTACC	GAAGCTCATCTCTCCTATGTGCTGGC
Ankrd1	NM_013468.3	TGCCATGAGTATAAACGGACG	GTGGATTCAAGCATATCTCGGAA
Tgfb1	NM_011577	CTCCCGTGGCTTCTAGTGC	GCCTTAGTTTGGACAGGATCTG
Tgfb2	NM_009367	TCGACATGGATCAGTTTATGCG	CCCTGGTACTGTTGTAGATGGA
Tgfb3	NM_009368	CCTGGCCCTGCTGAACTTG	TTGATGTGGCCGAAGTCCAAC
Smad7	NM_001042660	GGCCGGATCTCAGGCATTC	TTGGGTATCTGGAGTAAGGAGG
Snai2	NM_011415	GATGTGCCCTCAGGTTTGAT	GGCTGCTTCAAGGACACATT
