# Supplementary material for: In vivo CRISPR screens reveal SCAF1 and USP15 as novel drivers of pancreatic cancer
Source: Research Square preprint supplement (doi:10.21203/rs.3.rs-2352174/v1), 2022-12-22
Supplement: Supplementary file 4 [file d41d1d770aebfaa5bb1623a2.xlsx]

## Sheet: DESeq2LFCshrink_sgUSP15_1_S_vs_
Gene	baseMean	Fold_Change	log2FoldChange	lfcSE	pvalue	padj	...sgLUC_1_S1.sorted.bam	...sgLUC_2_S2.sorted.bam	...sgUSP15_1_S3.sorted.bam	...sgUSP15_2_S4.sorted.bam
Gsta3	1713.38	66.0768	6.04607	0.219142	2.43742e-168	3.60519e-164	46.2932	54.5221	2956.68	3796.02
Clca3b	1635.7	0.00672995	-7.21519	0.273398	2.04711e-154	1.51394e-150	3023.46	3475.12	26.9856	17.2381
Cxcl1	1672.8	0.0333594	-4.90576	0.201754	6.4042e-132	3.15749e-128	3726.09	2751.13	111.462	102.522
Fn1	6100.48	0.111513	-3.16472	0.133104	2.92706e-126	1.08235e-122	10935.5	11034	1276.54	1155.86
Cpe	1998.44	0.0856328	-3.54569	0.156387	5.97984e-115	1.76896e-111	3739.46	3630.64	289.802	333.875
Lcn2	1134.92	0.00531529	-7.55563	0.340383	1.191e-109	2.93602e-106	2227.22	2288.14	15.2527	9.0727
Xlr	725.824	21.2408	4.40877	0.238007	8.25259e-78	1.74377e-74	65.8392	62.5664	1622.66	1152.23
Ccl2	997.817	0.0806792	-3.63166	0.201128	3.14188e-74	5.80894e-71	2085.25	1611.53	158.394	136.091
Ugt2b35	1612.82	8.59954	3.10426	0.17893	1.06767e-68	1.75466e-65	382.69	282.443	2723.2	3062.94
Ms4a4d	455.165	121.761	6.92791	0.430383	2.4808e-58	3.66935e-55	5.14369	8.93806	773.196	1033.38
Gja1	374.644	0.051616	-4.27604	0.271877	6.71849e-57	9.03393e-54	693.369	732.921	38.7185	33.569
Cdh13	527.573	0.0874932	-3.51469	0.226865	1.70976e-55	2.10742e-52	948.496	993.912	96.2095	71.6744
Gstm2	1677.41	8.16387	3.02925	0.196197	5.65029e-55	6.42873e-52	325.081	395.956	2455.69	3532.91
Ugt2b34	6813.15	4.42606	2.14602	0.141153	1.80006e-53	1.90177e-50	2562.58	2408.81	10170.1	12111.2
Csf1	2589.85	0.190864	-2.38938	0.158327	1.00385e-52	9.89862e-50	4097.46	4619.19	906.951	735.796
2310057J18Rik	312.45	0.0181263	-5.78577	0.385548	1.96692e-51	1.81829e-48	635.76	592.593	10.5596	10.8872
Gpm6b	1220.77	0.146457	-2.77145	0.188915	7.01425e-50	6.10281e-47	2128.46	2142.45	251.083	361.094
Podxl	1100.31	0.119744	-3.06198	0.219183	1.01539e-45	8.34367e-43	1817.78	2119.21	290.975	173.289
Ly6g2	811.21	6.26375	2.64703	0.189339	1.3304e-45	1.03568e-42	212.949	227.027	1270.67	1534.19
Ptp4a3	324.046	0.0528736	-4.24131	0.304149	1.60946e-45	1.19028e-42	691.311	540.752	38.7185	25.4036
Bcat1	362.014	0.00750841	-7.05728	0.498894	1.85078e-45	1.30356e-42	709.829	727.558	7.03972	3.62908
Zc3h12a	561.856	0.140341	-2.83299	0.204182	5.88518e-45	3.95672e-42	994.789	981.398	127.888	143.349
Cdh16	319.671	17.849	4.15777	0.300757	1.35412e-44	8.70818e-42	33.9483	32.177	502.167	710.393
Pmepa1	751.249	0.163179	-2.61547	0.192136	1.72787e-43	1.06487e-40	1333.24	1255.8	229.964	185.99
Ppef1	237.733	23.1905	4.53546	0.339549	1.34094e-41	7.93354e-39	15.4311	22.3451	434.116	479.039
Enpp2	590.188	0.0894317	-3.48307	0.262946	3.98433e-41	2.26663e-38	1233.46	940.283	64.5308	122.481
Gpc1	430.85	0.117622	-3.08777	0.238474	1.1367e-39	6.22704e-37	738.633	806.213	103.249	75.3034
Tm4sf20	219.115	0.0272919	-5.19538	0.40316	1.32239e-38	6.98552e-36	457.788	396.85	8.21301	13.6091
Kirrel3	564.458	0.141181	-2.82438	0.221609	2.40913e-38	1.22874e-35	1033.88	951.903	111.462	160.587
Apob	6875.75	3.85773	1.94775	0.155491	4.0053e-37	1.97475e-34	2555.38	3038.04	9739.46	12170.1
Mvb12b	276.459	11.1794	3.48277	0.278645	4.65422e-37	2.22066e-34	48.3507	40.2212	529.153	488.111
Mettl7b	814.285	5.51589	2.46359	0.1981	1.11228e-36	5.14118e-34	219.121	271.717	1236.64	1529.66
Sord	3497.66	3.462	1.79161	0.144546	2.03773e-36	9.13337e-34	1540.02	1560.58	4998.2	5891.81
Dram1	329.497	0.113854	-3.13475	0.254607	4.53309e-36	1.97203e-33	629.587	556.841	68.0507	63.5089
Avil	539.339	8.32052	3.05667	0.250697	2.24323e-35	9.4799e-33	86.4139	138.54	1104.06	828.338
Nlrp4f	268.006	10.7218	3.42247	0.284752	1.87864e-34	7.7186e-32	42.1782	46.4779	539.712	443.655
Klhl22	932.048	4.44355	2.15171	0.179266	2.14629e-34	8.57994e-32	358.001	316.407	1640.26	1413.53
Gatm	514.827	0.153841	-2.70049	0.229151	2.2829e-33	8.88588e-31	969.071	820.513	157.22	112.502
Ulbp1	688.221	5.49618	2.45843	0.208633	2.95265e-33	1.11981e-30	192.374	222.558	1328.16	1009.79
P3h4	471.798	0.149408	-2.74268	0.233792	6.15798e-33	2.27707e-30	884.714	764.204	98.5561	139.72
Fgfbp1	1554.3	3.43124	1.77873	0.152408	1.26714e-32	4.57129e-30	716.001	669.46	2487.37	2344.39
Rhob	918.467	0.214354	-2.22193	0.192917	7.29709e-32	2.56979e-29	1573.97	1464.95	267.509	367.444
Htatip2	253.256	163.27	7.35112	0.625317	1.50756e-31	5.18566e-29	2.05747	3.57522	525.633	481.761
Cd14	2952.89	0.30237	-1.72561	0.151688	3.96782e-31	1.33382e-28	4652.98	4453.83	1213.18	1491.55
Prl2c2	352.911	0.00397263	-7.97569	0.688148	9.42786e-31	3.09883e-28	902.203	504.106	3.51986	1.81454
Itga7	567.357	4.91139	2.29613	0.204025	1.48287e-30	4.76808e-28	167.684	208.257	964.442	929.045
Shc2	290.735	0.119188	-3.06869	0.275497	5.20246e-30	1.63722e-27	586.38	456.735	56.3178	63.5089
Ugt2b36	1233.55	3.86046	1.94877	0.176169	1.32389e-29	4.0795e-27	498.938	500.531	1728.25	2206.48
Zfp704	214.218	15.9765	3.99788	0.363117	2.75085e-29	8.30364e-27	20.5747	27.708	305.055	503.535
Smagp	219.059	140.644	7.13591	0.634945	4.45475e-29	1.3178e-26	2.05747	3.57522	382.492	488.111
Mex3a	610.763	0.235445	-2.08654	0.191465	7.40644e-29	2.14801e-26	1005.08	980.505	237.004	220.467
Serpinb6c	158.209	36.201	5.17796	0.47184	1.13267e-28	3.22179e-26	3.08621	12.5133	341.427	275.81
Aldh1a7	206.074	10.1194	3.33906	0.30787	1.44134e-28	4.02244e-26	34.9771	36.646	362.546	390.126
Heca	282.558	0.142659	-2.80936	0.262909	7.94804e-28	2.17703e-25	488.65	505	62.1842	74.3962
Nfkbia	1755.28	0.319518	-1.64603	0.15421	1.01696e-27	2.73488e-25	2821.83	2523.21	797.835	878.238
Cxcl2	151.946	0.0202937	-5.62283	0.523497	1.58849e-27	4.19559e-25	313.765	282.443	7.03972	4.53635
Adgrg6	664.066	0.224773	-2.15346	0.204259	3.74585e-27	9.72016e-25	1044.17	1136.03	202.979	273.088
Zfpm2	890.282	0.285409	-1.8089	0.173286	1.15185e-26	2.93741e-24	1332.21	1451.54	375.452	401.921
Cdc42ep1	1041.46	0.249772	-2.00131	0.192216	1.5369e-26	3.85292e-24	1642.89	1708.06	336.733	478.131
Tenm4	454.428	0.182849	-2.45128	0.23593	1.57089e-26	3.8725e-24	657.363	885.761	146.661	127.925
Nid1	2478.56	0.345563	-1.53298	0.148039	2.96636e-26	7.19269e-24	3841.31	3559.13	1343.41	1170.38
Hkdc1	1021.96	3.84341	1.94239	0.188135	3.80449e-26	9.07617e-24	398.121	430.814	1404.42	1854.46
Cldn18	221.907	0.119987	-3.05905	0.300252	1.23756e-25	2.90552e-23	428.983	366.46	50.4513	41.7344
Rnf43	281.981	0.159003	-2.65288	0.261402	2.21521e-25	5.11956e-23	473.219	505	68.0507	81.6543
Ube2e2	138.228	0.0401605	-4.63808	0.454088	2.97714e-25	6.77461e-23	284.96	248.478	5.86644	13.6091
Pdzk1ip1	183.368	16.0673	4.00606	0.397931	5.81791e-25	1.30383e-22	18.5173	22.3451	241.697	450.913
D630003M21Rik	515.841	0.214306	-2.22226	0.223759	1.69575e-24	3.74357e-22	922.777	787.443	149.007	204.136
Fabp4	222.444	10.3045	3.36521	0.339141	1.79234e-24	3.89861e-22	49.3794	26.8142	339.08	474.502
Akap11	135.512	0.0190351	-5.71519	0.575119	5.29604e-24	1.13527e-21	246.897	285.124	8.21301	1.81454
Anxa10	297.758	0.136344	-2.87468	0.294785	8.63037e-24	1.8236e-21	614.156	437.965	84.4767	54.4362
Ptgs1	872.18	3.77367	1.91597	0.195916	9.67996e-24	1.98856e-21	321.995	394.168	1220.22	1552.34
Ly6f	134.666	14.7164	3.87935	0.396273	9.54982e-24	1.98856e-21	17.4885	15.1947	242.87	263.108
Isyna1	628.11	3.97903	1.99242	0.205312	2.1096e-23	4.27439e-21	222.207	271.717	911.644	1106.87
Nkain1	136.685	0.0145456	-6.10327	0.6181	2.48382e-23	4.96462e-21	268.5	270.823	4.69315	2.72181
Fbln1	347.572	0.195058	-2.35802	0.24397	2.61622e-23	5.15954e-21	521.57	648.009	109.116	111.594
Zhx1	251.633	6.25124	2.64414	0.27476	4.04027e-23	7.86311e-21	61.7242	72.3982	470.488	401.921
Cdc27	3530.32	2.49899	1.32135	0.136916	4.43805e-23	8.52508e-21	1903.16	2084.35	4975.91	5157.83
Mst1	405.136	4.35134	2.12146	0.221343	6.12595e-23	1.16165e-20	138.88	156.416	691.066	634.182
Mex3b	118.847	0.0408005	-4.61527	0.480136	8.06804e-23	1.51056e-20	246.897	210.938	9.3863	8.16543
Dusp9	599.453	3.58999	1.84398	0.193034	8.68751e-23	1.60621e-20	266.443	245.797	985.561	900.012
Cxcl5	12664.2	0.0365479	-4.77407	0.506635	2.06068e-22	3.7629e-20	29635.9	19359.8	599.55	1061.51
Igfbp7	4040.47	0.280307	-1.83492	0.194551	2.6188e-22	4.72374e-20	6116.87	6582.88	1316.43	2145.69
Slc5a3	1676.12	2.7336	1.4508	0.154476	4.90532e-22	8.74152e-20	820.932	948.328	2427.53	2507.7
Ak4	274.802	0.15523	-2.68752	0.288195	5.32946e-22	9.3843e-20	469.104	486.23	90.3431	53.529
Clca3a1	254.162	0.131726	-2.92439	0.314269	6.01154e-22	1.04608e-19	495.851	405.788	75.0904	39.9199
Atp6v0e2	364.384	4.65825	2.21979	0.239103	9.85547e-22	1.69503e-19	142.994	108.15	623.015	583.375
Mtap	10454.4	0.442162	-1.17735	0.126714	1.44232e-21	2.4521e-19	14277.8	14861.3	6548.12	6130.43
Aldh1a1	1584.48	2.6342	1.39737	0.151082	1.87371e-21	3.14932e-19	884.714	834.814	2238.63	2379.77
Sult1d1	845.03	3.79262	1.92319	0.208537	1.92608e-21	3.20096e-19	392.978	297.637	1158.03	1531.47
Car9	673.254	0.0357502	-4.80591	0.52498	2.25399e-21	3.70431e-19	1471.09	1135.13	58.6644	28.1254
Npepl1	2261.16	0.339959	-1.55657	0.168925	2.3918e-21	3.8876e-19	3775.47	3014.81	1019.59	1234.79
Sox4	3118.39	0.339258	-1.55955	0.169312	2.421e-21	3.89229e-19	5381.33	3987.27	1461.92	1643.07
Tle3	1334.64	0.305457	-1.71096	0.186318	3.03609e-21	4.82869e-19	1876.42	2238.98	520.939	702.227
Arl6ip1	459.948	3.70429	1.8892	0.207151	5.07752e-21	7.98953e-19	197.518	185.018	725.091	732.167
Msh4	2215.64	748.24	9.54736	1.0529	8.93707e-21	1.39145e-18	1.02874	8.93806	4579.34	4273.24
Scnn1a	404.7	6.74747	2.75435	0.305363	1.13483e-20	1.74846e-18	96.7013	104.575	465.795	951.727
Itln1	118.476	0.0169201	-5.88511	0.6416	1.72305e-20	2.62738e-18	280.845	185.912	3.51986	3.62908
Tmem238l	131.814	0.0109756	-6.50956	0.708739	2.97563e-20	4.49107e-18	299.363	222.558	3.51986	1.81454
Nectin3	165.706	0.130047	-2.9429	0.331051	3.59243e-20	5.36723e-18	304.506	285.124	38.7185	34.4763
Nr2f1	109.395	0.0550963	-4.1819	0.46883	4.70963e-20	6.96601e-18	183.115	233.283	9.3863	11.7945
Hs3st1	827.198	0.342139	-1.54735	0.174472	5.53969e-20	8.11262e-18	1197.45	1282.61	425.903	402.828
Zdhhc15	107.573	15.8072	3.98251	0.451296	8.53665e-20	1.2379e-17	13.3736	10.7257	222.925	183.269
Macc1	154.277	0.114271	-3.12947	0.357254	1.0284e-19	1.4768e-17	295.248	260.991	36.3719	24.4963
Fabp5	144.844	0.114289	-3.12924	0.357078	1.13048e-19	1.60778e-17	263.357	259.204	30.5055	26.3108
Fnip1	1688.87	2.47176	1.30554	0.148608	1.36366e-19	1.92094e-17	928.95	988.549	2462.73	2375.23
Tnfaip3	623.926	0.297896	-1.74712	0.199539	1.44499e-19	2.0163e-17	886.772	1049.33	259.296	300.306
Wipf1	145.972	0.114077	-3.13192	0.359632	1.7187e-19	2.37582e-17	266.443	260.097	32.852	24.4963
Slc43a2	328.163	0.1901	-2.39517	0.275531	2.37085e-19	3.24697e-17	591.524	520.195	73.9171	127.018
Gdpd5	702.647	0.322994	-1.63042	0.188528	3.78949e-19	5.14223e-17	1147.04	992.124	320.307	351.114
Cnksr2	105.723	0.0164243	-5.92803	0.67188	4.95766e-19	6.66625e-17	219.121	197.531	3.51986	2.72181
Cx3cl1	1703.61	0.3872	-1.36885	0.159207	6.92278e-19	9.22476e-17	2332.15	2611.7	863.539	1007.07
Vnn3	211.8	0.151825	-2.71952	0.318022	8.38966e-19	1.10796e-16	398.121	343.221	38.7185	67.138
Maob	824.112	4.33676	2.11662	0.249054	1.26105e-18	1.65064e-16	239.696	359.31	1028.97	1668.47
Ccl20	467.042	0.278779	-1.84281	0.216958	1.4589e-18	1.89286e-16	762.294	709.682	174.82	221.374
Elmo3	343.613	4.8219	2.2696	0.268487	1.76264e-18	2.26706e-16	122.42	106.363	455.235	690.433
Neto2	124.344	0.00939582	-6.73377	0.768347	2.27472e-18	2.90046e-16	230.437	262.779	2.34657	1.81454
Ddit4	3707.8	0.396026	-1.33633	0.158168	2.52722e-18	3.19488e-16	5642.62	5050.9	1815.08	2322.61
Foxp2	108.112	0.0133272	-6.22948	0.715773	2.7176e-18	3.40645e-16	221.179	206.469	1.17329	3.62908
Nfkbiz	801.743	0.355688	-1.49131	0.177231	2.99604e-18	3.72391e-16	1225.23	1155.69	434.116	391.941
Gjb1	319.519	4.933	2.30246	0.274704	3.17103e-18	3.90856e-16	119.334	89.3806	438.809	630.553
Vcam1	3366.02	0.324512	-1.62366	0.19328	3.22455e-18	3.94168e-16	5502.72	4736.28	1255.42	1969.68
Akr1c14	153.322	7.81545	2.96633	0.354109	3.28319e-18	3.98047e-16	37.0345	29.4956	234.657	312.101
Mapt	374.252	3.74006	1.90306	0.226821	3.36142e-18	4.04218e-16	140.937	166.248	581.95	607.871
Rora	112.104	10.6731	3.4159	0.408665	4.5467e-18	5.4234e-16	16.4598	19.6637	201.805	210.487
Mettl2	1855.68	2.82415	1.49782	0.179702	6.03395e-18	7.13985e-16	1051.37	852.69	3127.98	2390.66
Bcas1	605.321	3.57627	1.83845	0.221173	6.49689e-18	7.62663e-16	261.299	254.735	780.236	1125.02
Gpr55	110.987	18.5403	4.21259	0.508263	8.81356e-18	1.02647e-15	11.3161	9.83186	136.101	286.697
Col6a1	245.5	0.198033	-2.33619	0.282622	9.02719e-18	1.04313e-15	447.501	378.974	65.7041	89.8198
Sbk1	352.592	0.266519	-1.90769	0.230898	9.70953e-18	1.11328e-15	563.748	558.628	133.755	154.236
F3	1087.19	0.396575	-1.33433	0.161724	1.36314e-17	1.55094e-15	1556.48	1578.46	587.817	626.017
Bcl3	584.014	0.331536	-1.59276	0.193924	1.56838e-17	1.77083e-15	836.363	930.452	289.802	279.439
Atp6v0a4	180.289	5.7366	2.5202	0.310494	2.95019e-17	3.30578e-15	55.5518	47.3717	289.802	328.432
Bsg	24147.4	0.387685	-1.36704	0.168411	3.96828e-17	4.41314e-15	40134.1	29957.7	11684.8	14813
Pdgfa	310.749	0.25266	-1.98473	0.246756	5.50925e-17	5.99172e-15	544.202	455.841	123.195	119.76
Gpd1l	2390.61	2.43304	1.28276	0.158632	5.45149e-17	5.99172e-15	1357.93	1382.72	3021.21	3800.56
Ncald	171.999	7.1606	2.84008	0.353226	5.50478e-17	5.99172e-15	40.1208	40.2212	231.138	376.517
Ptprg	94.2851	0.0720144	-3.79557	0.471396	6.36841e-17	6.87556e-15	188.259	165.354	11.7329	11.7945
Akr1c19	3225.04	2.1867	1.12876	0.139643	6.85754e-17	7.34999e-15	2013.24	1982.46	4203.89	4700.57
Chd7	151.963	0.140845	-2.82782	0.352862	7.68137e-17	8.17375e-15	273.644	263.673	26.9856	43.549
Mfsd1	103.736	0.0113842	-6.45682	0.778413	9.83986e-17	1.03958e-14	201.633	209.15	2.34657	1.81454
Tnxb	2585.24	2.55115	1.35115	0.169143	1.20122e-16	1.26009e-14	1410.4	1450.65	3174.92	4305
Pgrmc1	6165.97	2.08119	1.05741	0.132116	1.3963e-16	1.45441e-14	4022.36	3885.37	7970.14	8786.01
Itga2	1861.36	0.430455	-1.21607	0.152439	1.42579e-16	1.47475e-14	2702.49	2538.41	1027.8	1176.73
Tnip3	85.9415	0.0205502	-5.6047	0.693351	1.93861e-16	1.99125e-14	188.259	149.266	3.51986	2.72181
Tspan33	189.199	6.02179	2.59019	0.330091	2.34082e-16	2.3878e-14	65.8392	37.5398	344.946	308.472
Ndufb11	3662.82	2.11873	1.0832	0.138227	5.00426e-16	5.03524e-14	2420.62	2214.85	4819.86	5195.94
Junb	1805.27	0.345152	-1.5347	0.196986	4.99348e-16	5.03524e-14	2176.81	3234.68	822.474	987.11
Col4a1	2463.59	0.392246	-1.35017	0.173419	5.73064e-16	5.72715e-14	3322.82	3805.82	1569.86	1155.86
Micall2	484.121	0.331403	-1.59334	0.207029	1.04233e-15	1.03471e-13	695.426	771.354	222.925	246.778
Abcc2	110.621	132.33	7.04799	0.882249	2.3697e-15	2.33668e-13	0	2.68142	163.087	276.717
Vnn1	4933.97	0.446962	-1.16178	0.152974	3.03504e-15	2.97293e-13	7582.82	6155.64	2794.77	3202.66
Flcn	1730.92	2.21927	1.15009	0.151353	3.25474e-15	3.16716e-13	1039.02	1079.72	2269.14	2535.82
Sphk1	495.748	0.340972	-1.55227	0.207145	4.26369e-15	4.12185e-13	804.473	688.23	241.697	248.592
Tnfaip2	6777.97	0.47452	-1.07546	0.142316	4.52273e-15	4.34388e-13	10114.5	8396.41	4405.69	4195.22
Atp8a1	106.527	0.0986445	-3.34162	0.446427	4.72702e-15	4.51079e-13	150.196	240.434	16.426	19.0527
Nectin1	233.192	0.237208	-2.07578	0.277695	5.07e-15	4.80708e-13	359.029	402.212	76.2637	95.2634
Igf2bp1	785.187	2.69827	1.43204	0.19116	5.64327e-15	5.31654e-13	363.144	466.566	1201.45	1109.59
Casp12	475.644	0.340353	-1.5549	0.209863	6.2435e-15	5.84479e-13	714.972	718.62	255.777	213.209
Tom1l2	1663.66	2.22754	1.15545	0.154087	6.50085e-15	6.04743e-13	987.588	1041.28	2167.06	2458.7
Mbnl3	100.496	0.109134	-3.19583	0.430089	6.774e-15	6.23544e-13	200.604	164.46	18.7726	18.1454
Mpp1	6397.17	2.29761	1.20014	0.160148	6.78727e-15	6.23544e-13	3573.83	4058.77	7748.39	10207.7
Col27a1	820.656	0.364562	-1.45576	0.195424	7.35945e-15	6.71936e-13	1365.13	1061.84	396.571	459.079
Tsc22d1	8758.61	0.508063	-0.976922	0.131094	1.14987e-14	1.04342e-12	12293.4	11086.8	5679.88	5974.38
Pax2	134.444	6.8755	2.78146	0.378946	1.25277e-14	1.12986e-12	37.0345	27.708	193.592	279.439
Saa3	98.3624	0.00920708	-6.76304	0.87426	1.49577e-14	1.33277e-12	217.064	173.398	1.17329	1.81454
Prr15l	906.617	2.87588	1.524	0.207208	1.48807e-14	1.33277e-12	452.644	460.31	1095.85	1617.66
Nckap5	77.6204	30.8743	4.94833	0.670051	1.67939e-14	1.48741e-12	6.17242	2.68142	93.863	207.765
Gls2	1725.35	0.425501	-1.23277	0.167941	1.96664e-14	1.73147e-12	2698.38	2182.67	939.803	1080.56
Spp1	22238.1	0.406662	-1.2981	0.177686	2.36566e-14	2.07044e-12	35288.8	28470.4	14893.7	10299.3
Hist1h1c	1703.54	0.123938	-3.01231	0.41672	2.44582e-14	2.12801e-12	3703.45	2409.7	282.762	418.252
Cd44	6983.29	0.466362	-1.10048	0.15025	2.57326e-14	2.2258e-12	9386.2	9803.26	3839	4904.7
Gyg	218.958	4.34484	2.1193	0.292237	2.70885e-14	2.32946e-12	64.8105	92.062	337.907	381.054
Kansl1	2009.61	2.15433	1.10724	0.151931	3.36343e-14	2.87564e-12	1153.21	1354.12	2754.88	2776.25
Hspa12a	349.4	0.224492	-2.15527	0.299402	3.98194e-14	3.38487e-12	594.61	559.522	77.437	166.03
Cyp2c65	100.684	7.99079	2.99834	0.421515	7.36695e-14	6.22655e-12	18.5173	23.2389	159.567	201.414
Pik3r5	278.719	0.282647	-1.82293	0.256633	7.68e-14	6.45425e-12	431.041	446.009	132.581	105.243
Eps8l3	897.73	0.427852	-1.22482	0.171708	9.14391e-14	7.64111e-12	1232.43	1304.06	500.994	553.435
Fam20c	1446.86	0.380494	-1.39405	0.196124	9.68297e-14	8.04611e-12	2011.18	2221.11	620.669	934.488
Cd24a	10435.1	0.524128	-0.932008	0.130234	1.10935e-13	9.16668e-12	13880.8	13686.8	6679.52	7493.15
Xiap	3087.12	2.18809	1.12967	0.158697	1.1396e-13	9.36431e-12	2134.63	1674.1	4076	4463.77
Plac8	8966.43	0.516718	-0.952551	0.133448	1.21827e-13	9.95546e-12	12672	11135.9	5891.07	6166.72
Gsap	449.055	0.361793	-1.46676	0.207799	1.31399e-13	1.06787e-11	660.449	671.248	224.098	240.427
Maoa	2203.91	2.03904	1.02789	0.144432	1.33176e-13	1.0764e-11	1484.47	1374.67	2886.29	3070.2
Stag2	4067.07	1.93212	0.950185	0.133567	1.56711e-13	1.25973e-11	2830.06	2649.24	5300.91	5488.08
Hist1h2bc	293.625	0.22909	-2.12601	0.30375	1.66522e-13	1.33136e-11	543.173	423.664	71.5705	136.091
R3hdml	410.947	0.332303	-1.58943	0.22728	1.90869e-13	1.51782e-11	695.426	550.584	201.805	195.97
Ehf	2690.13	0.471238	-1.08547	0.154117	2.02318e-13	1.59165e-11	3781.64	3591.31	1515.89	1871.7
Kcnab2	63.424	0.0426061	-4.5528	0.644232	2.02462e-13	1.59165e-11	119.334	125.133	4.69315	4.53635
Fer1l6	476.939	2.70495	1.4356	0.205015	2.04457e-13	1.59165e-11	251.012	251.159	665.254	740.333
Cebpd	72.7258	0.0748832	-3.73921	0.534782	2.04333e-13	1.59165e-11	121.391	151.053	9.3863	9.0727
Pglyrp1	122.848	0.147665	-2.7596	0.396125	2.10225e-13	1.62797e-11	246.897	185.912	22.2925	36.2908
Lmbrd2	1158.4	2.15842	1.10997	0.158012	2.24119e-13	1.72653e-11	730.404	711.469	1580.42	1611.31
Gk	1308.04	2.2438	1.16594	0.166268	2.27463e-13	1.73974e-11	862.082	721.301	1899.55	1749.22
Celsr1	657.565	3.01668	1.59296	0.22835	2.28186e-13	1.73974e-11	288.046	347.69	797.835	1196.69
Hist1h2bm	154.899	2412.5	11.2363	2.98174	2.52554e-13	1.91565e-11	0	0	323.827	295.77
Col6a2	98.9175	0.113322	-3.14149	0.453648	2.9123e-13	2.19774e-11	215.006	143.903	14.0794	22.6818
Irak1	2393.36	2.01465	1.01053	0.144233	2.98353e-13	2.24007e-11	1496.81	1632.09	3102.17	3342.38
Zfp760	69.4787	0.0617479	-4.01747	0.580413	3.21625e-13	2.4026e-11	152.253	110.832	9.3863	5.44362
Galm	370.067	3.16395	1.66173	0.240425	3.48601e-13	2.59103e-11	165.627	178.761	488.087	647.791
Cmtm7	561.839	0.383881	-1.38127	0.19962	4.09812e-13	3.02478e-11	827.105	812.469	275.722	332.061
Kalrn	335.942	0.291374	-1.77905	0.258485	4.11048e-13	3.02478e-11	544.202	508.575	114.982	176.01
D16Ertd472e	61.9865	0.0290661	-5.10452	0.726659	4.93527e-13	3.61374e-11	127.563	114.407	2.34657	3.62908
Aass	136.593	5.18405	2.37408	0.347505	4.96518e-13	3.61774e-11	46.2932	37.5398	239.351	223.189
Lgals4	23362.3	1.91824	0.939786	0.135815	5.26063e-13	3.81422e-11	15514.4	16040.2	28238.7	33656.1
Vash2	269.684	0.289289	-1.78942	0.262226	5.61973e-13	4.0547e-11	403.265	441.54	131.408	102.522
Fgb	67.5015	58.896	5.8801	0.832754	6.00461e-13	4.31137e-11	3.08621	0.893806	100.903	165.123
Pla1a	1054.5	2.48012	1.31041	0.191409	6.65058e-13	4.75211e-11	655.306	530.027	1326.99	1705.67
Arl4c	1237.69	0.448054	-1.15825	0.168872	7.0798e-13	5.03448e-11	1761.2	1688.4	674.64	826.523
Mtmr1	642.44	2.47958	1.31009	0.191978	7.7261e-13	5.46778e-11	394.006	328.027	918.684	929.045
Bmf	2716.24	0.408216	-1.29259	0.18984	8.18119e-13	5.76229e-11	4555.25	3237.36	1334.03	1738.33
Slc20a1	828.244	0.431304	-1.21322	0.177994	8.84938e-13	6.20337e-11	1130.58	1205.74	454.062	522.588
H1f0	19411.9	0.475389	-1.07282	0.157213	1.02356e-12	7.14128e-11	27181.3	25856.9	10438.7	14170.7
Ptprh	61.6069	22.2291	4.47437	0.656812	1.23153e-12	8.55192e-11	1.02874	8.04425	118.502	118.852
4930461G14Rik	898.204	2.23901	1.16286	0.171949	1.2652e-12	8.74466e-11	575.064	512.151	1227.26	1278.34
Lpcat4	1779.38	0.504084	-0.988264	0.145576	1.3793e-12	9.48897e-11	2381.53	2387.35	1159.21	1189.43
Hoxc6	179.511	4.06244	2.02235	0.302341	1.45426e-12	9.95833e-11	65.8392	69.7168	272.203	310.286
Anxa5	7464.83	0.536167	-0.899246	0.132496	1.49127e-12	1.01647e-10	9433.52	10147.4	4893.78	5384.65
Mid1ip1	1749.7	2.01172	1.00843	0.149222	1.49819e-12	1.0165e-10	1091.49	1193.23	2400.55	2313.54
Asb17	120.011	1797.59	10.8119	2.9424	1.98104e-12	1.33797e-10	0	0	240.524	239.519
Lrp12	60.2978	0.0294607	-5.08506	0.744749	2.34402e-12	1.57592e-10	114.19	121.558	0	5.44362
Eif4e3	97.7265	0.0064681	-7.27244	1.01807	2.5333e-12	1.69548e-10	184.144	204.681	1.17329	0.90727
Thbs1	716.256	0.399424	-1.32401	0.199804	2.87918e-12	1.91443e-10	1168.65	900.062	378.972	417.344
Nqo1	416.871	2.9001	1.5361	0.232318	2.88634e-12	1.91443e-10	211.92	202.894	535.019	717.651
Mex3d	960.103	0.440723	-1.18206	0.178685	3.60741e-12	2.38202e-10	1270.49	1421.15	520.939	627.831
Ddah2	173.475	0.24834	-2.00961	0.307327	3.88911e-12	2.55661e-10	295.248	267.248	63.3575	68.0453
Cmtm8	117.655	0.000594643	-10.7157	3.0118	3.91536e-12	2.56248e-10	248.954	221.664	0	0
Crtap	61.4866	0.0610706	-4.03338	0.617612	4.49875e-12	2.93132e-10	113.161	119.77	9.3863	3.62908
Gm773	97.6336	6.6718	2.73808	0.420259	4.58502e-12	2.97443e-10	18.5173	28.6018	170.127	173.289
Ttyh3	713.309	0.435145	-1.20043	0.182989	5.06687e-12	3.27267e-10	971.128	1036.81	398.918	446.377
Zfp982	145.638	4.57137	2.19263	0.338148	5.38464e-12	3.46279e-10	55.5518	43.7965	226.444	256.758
Fhl1	322.383	3.37658	1.75556	0.27089	6.32372e-12	4.04909e-10	137.851	145.69	395.398	610.593
Gm6166	69.4657	0.0981992	-3.34815	0.517617	6.48893e-12	4.13697e-10	126.535	128.708	11.7329	10.8872
H2afx	1017.08	0.379301	-1.39859	0.215519	6.97056e-12	4.42496e-10	1290.04	1692.87	437.636	647.791
Gbp2	139.761	0.218551	-2.19396	0.340449	7.1003e-12	4.48806e-10	221.179	243.115	45.7582	48.9926
Irf6	62.5211	0.0703372	-3.82957	0.594535	7.52636e-12	4.71705e-10	115.219	119.77	10.5596	4.53635
Rhox5	5788.79	1.91317	0.935966	0.142892	7.50298e-12	4.71705e-10	4066.6	3762.03	8323.3	7003.22
Elf4	1093.4	2.16211	1.11244	0.171059	8.14206e-12	5.0814e-10	696.455	659.628	1376.27	1641.25
Blvrb	1436.09	1.97793	0.983991	0.150882	8.70273e-12	5.40849e-10	948.496	949.221	1935.92	1910.71
Clu	18918.6	0.500404	-0.998834	0.153936	1.03579e-11	6.41021e-10	25494.2	25372.5	10613.6	14194.2
Nfkbie	911.524	0.463374	-1.10975	0.1718	1.09273e-11	6.73442e-10	1285.92	1229.88	531.499	598.798
C920009B18Rik	138.205	4.61941	2.20771	0.346713	1.15546e-11	7.09145e-10	47.3219	45.5841	255.777	204.136
Cldn3	128.613	4.85109	2.27831	0.357645	1.17106e-11	7.15747e-10	39.092	43.7965	194.766	236.798
3830403N18Rik	543.213	2.52972	1.33898	0.209184	1.28973e-11	7.85034e-10	329.196	269.929	850.633	723.094
Zfp985	513.642	2.74001	1.45418	0.227781	1.31727e-11	7.98516e-10	316.851	216.301	791.969	729.445
Limk2	2414.34	1.89851	0.92487	0.14293	1.33869e-11	8.08189e-10	1634.66	1648.18	3029.43	3345.11
Bcl7a	56.8278	0.0219087	-5.51235	0.83597	1.38138e-11	8.30567e-10	120.362	102.788	2.34657	1.81454
Slc12a2	7682	0.554479	-0.850796	0.131357	1.42623e-11	8.54065e-10	9907.77	10004.4	5107.32	5708.55
G6pdx	1868.7	2.04146	1.0296	0.160462	1.6375e-11	9.76622e-10	1088.4	1324.62	2413.45	2648.32
Ksr2	54.2245	36.9984	5.20939	0.806549	1.82075e-11	1.08156e-09	4.11495	0.893806	130.235	81.6543
Ctxn1	205.241	0.27068	-1.88534	0.298747	1.83377e-11	1.08493e-09	288.046	366.46	73.9171	92.5416
Rab7b	215.279	3.83741	1.94013	0.308426	1.94092e-11	1.14375e-09	93.6151	75.9735	412.997	278.532
Mfsd2a	217.853	0.292802	-1.772	0.281295	1.96618e-11	1.15404e-09	372.403	310.151	92.6897	96.1707
Usp9x	3355.24	1.94988	0.963384	0.150651	2.06753e-11	1.20873e-09	2059.53	2415.96	4168.69	4776.78
Fgf1	1310.67	2.41171	1.27006	0.20043	2.12998e-11	1.24034e-09	658.392	839.283	1555.78	2189.24
Ipcef1	77.7595	11.2809	3.49581	0.556686	2.18111e-11	1.26513e-09	10.2874	12.5133	86.8232	201.414
Diaph2	610.317	2.40924	1.26858	0.200468	2.25007e-11	1.30003e-09	306.564	390.593	885.832	858.278
Tppp	190.213	4.46407	2.15836	0.344405	2.26734e-11	1.30491e-09	64.8105	67.0354	225.271	403.735
Tmem79	254.363	0.32499	-1.62153	0.257953	2.31252e-11	1.32575e-09	387.834	389.699	113.809	126.111
Parp8	444.056	0.39963	-1.32326	0.209872	2.42689e-11	1.38595e-09	611.07	672.142	241.697	251.314
Oaf	1984.99	0.482913	-1.05017	0.165774	2.61294e-11	1.48646e-09	3045.06	2359.65	1265.98	1269.27
Gm379	55.1365	15.8776	3.98892	0.637201	3.0908e-11	1.74981e-09	6.17242	5.36283	125.542	83.4689
Arhgef26	51.1037	19.653	4.29668	0.682827	3.09952e-11	1.74981e-09	5.14369	3.57522	86.8232	108.872
Gramd4	3565.11	0.550395	-0.861462	0.135726	3.18156e-11	1.78929e-09	4818.61	4451.15	2472.12	2518.58
Atrx	2169.17	1.86266	0.897365	0.141966	3.66865e-11	2.05542e-09	1487.55	1498.02	2920.31	2770.8
Sparc	1291.92	1.97295	0.980353	0.155601	3.71353e-11	2.07271e-09	840.478	867.885	1680.15	1779.16
Ier3	1103.25	0.46444	-1.10643	0.177838	5.09578e-11	2.83352e-09	1370.28	1674.1	638.268	730.353
Arhgap40	257.331	3.08159	1.62368	0.263509	5.1405e-11	2.84768e-09	127.563	115.301	355.506	430.953
Lamb1	754.383	0.426285	-1.23011	0.198992	5.68817e-11	3.13932e-09	951.582	1186.08	483.394	396.477
Gm50321	64.6148	0.101682	-3.29787	0.538274	5.83336e-11	3.20748e-09	130.65	106.363	10.5596	10.8872
Hmga2	3201.2	0.496227	-1.01093	0.163177	5.88966e-11	3.22645e-09	4815.52	3829.06	2258.58	1901.64
Cyp2s1	1944.56	2.25828	1.17523	0.190377	6.60488e-11	3.6049e-09	1032.85	1297.81	2270.31	3177.26
Camkk1	560.389	2.31758	1.21262	0.197495	7.82579e-11	4.25556e-09	302.449	355.735	793.142	790.232
Tcim	735.12	0.425752	-1.23191	0.201183	8.44091e-11	4.57324e-09	986.559	1100.27	363.719	489.926
Mrps6	1588.19	1.89545	0.922543	0.149217	8.55984e-11	4.60395e-09	1062.69	1095.81	2048.56	2145.69
Pkdcc	1334.66	0.470923	-1.08644	0.17683	8.53677e-11	4.60395e-09	1994.72	1673.2	746.211	924.508
Pea15a	4025.28	0.541033	-0.886211	0.143315	8.85986e-11	4.74805e-09	5703.32	4831.91	2824.1	2741.77
C1galt1c1	1296.17	2.02655	1.01902	0.165759	9.07039e-11	4.82867e-09	904.26	775.823	1847.93	1656.68
Snn	533.57	0.370191	-1.43366	0.235525	9.07559e-11	4.82867e-09	845.622	732.921	218.231	337.505
Tnfrsf9	418.599	0.369327	-1.43703	0.236654	9.39076e-11	4.97845e-09	705.714	531.814	238.177	198.692
Ly6d	50.5616	0.0548294	-4.18891	0.683371	9.45555e-11	4.9949e-09	103.902	89.3806	3.51986	5.44362
Thnsl2	55.0617	14.6312	3.87098	0.637156	9.55783e-11	5.02958e-09	6.17242	6.25664	76.2637	131.554
Egfr	109.172	4.91433	2.29699	0.380772	9.58922e-11	5.02958e-09	37.0345	32.177	184.206	183.269
Nhsl1	59.8244	0.0856541	-3.54533	0.588996	1.01211e-10	5.27834e-09	119.334	102.788	11.7329	5.44362
Stac	205.438	0.292331	-1.77433	0.294058	1.01349e-10	5.27834e-09	359.029	285.124	95.0363	82.5616
Filip1l	864.529	0.384872	-1.37755	0.226936	1.03531e-10	5.37309e-09	1050.34	1478.35	377.798	551.62
Col8a1	54.7439	0.0729788	-3.77638	0.622015	1.08589e-10	5.61589e-09	113.161	92.9558	4.69315	8.16543
Dynlt3	1727.56	2.23918	1.16297	0.190892	1.09026e-10	5.61882e-09	1239.63	843.752	2265.62	2561.22
Slc19a2	873.729	2.04776	1.03405	0.16908	1.10311e-10	5.66532e-09	569.92	554.159	1165.07	1205.76
Fam162a	2759.05	0.545092	-0.875428	0.142378	1.12951e-10	5.78082e-09	3746.66	3456.35	1832.67	2000.53
Mb21d2	52.3014	16.0773	4.00695	0.664811	1.20424e-10	6.14205e-09	8.2299	2.68142	110.289	88.0052
Sptssb	5439.04	2.20771	1.14255	0.188137	1.26505e-10	6.43003e-09	3869.08	2755.6	6422.57	8708.89
Lamp2	4942.89	1.85966	0.895042	0.146168	1.29533e-10	6.5557e-09	3673.62	3132.79	6063.55	6901.61
Sprr1a	2609.18	0.176556	-2.5018	0.419877	1.29864e-10	6.5557e-09	5087.11	3901.46	540.885	907.27
Clmn	74.528	0.00101883	-9.93886	2.93573	1.39329e-10	7.00957e-09	139.908	158.204	0	0
Fam83e	119.231	5.41905	2.43804	0.408715	1.41698e-10	7.10459e-09	38.0633	31.2832	149.007	258.572
Sema4c	521.25	0.434332	-1.20313	0.199707	1.42608e-10	7.12608e-09	775.668	695.381	310.921	303.028
Atg9b	228.822	0.300344	-1.73531	0.291415	1.61454e-10	8.04061e-09	348.742	363.779	122.022	80.7471
Fermt1	2187.73	0.476274	-1.07014	0.177112	1.63916e-10	8.13586e-09	2986.42	3004.97	1142.78	1616.76
H3f3b	16519.5	0.579391	-0.78739	0.128446	1.66976e-10	8.25999e-09	22245.4	19880.9	12091.9	11859.8
Zmynd15	332.263	0.355987	-1.4901	0.249818	1.74881e-10	8.62222e-09	546.26	446.009	188.899	147.885
Gm11884	49.2738	0.0577436	-4.11419	0.686828	1.80464e-10	8.85539e-09	94.6438	92.9558	5.86644	3.62908
Fam214a	144.111	4.06385	2.02285	0.340502	1.80808e-10	8.85539e-09	49.3794	58.0974	207.672	261.294
Lmx1a	94.1083	5.98584	2.58155	0.43615	1.86667e-10	9.08288e-09	23.661	25.9204	197.112	129.74
Timm17b	1174.47	1.96953	0.977854	0.161807	1.86681e-10	9.08288e-09	819.904	732.921	1602.71	1542.36
Dhx40	404.893	2.42722	1.2793	0.213807	1.92338e-10	9.32742e-09	227.351	231.496	593.683	567.044
Cxxc4	162.48	0.210606	-2.24738	0.37944	1.97095e-10	9.52692e-09	314.794	230.602	32.852	71.6744
Prl2c3	74.7945	0.00892677	-6.80765	1.07577	2.10668e-10	1.01498e-08	211.92	84.9115	2.34657	0
Tmem132a	292.791	0.356055	-1.48983	0.250955	2.19076e-10	1.05206e-08	468.075	407.575	134.928	160.587
Tnnt2	628.948	0.453067	-1.1422	0.191132	2.21541e-10	1.06046e-08	877.513	872.354	412.997	352.928
Ext1	2095.13	0.534537	-0.903639	0.149971	2.26805e-10	1.08215e-08	2715.87	2793.14	1540.53	1330.97
Mmp15	69.3422	0.00110963	-9.8157	2.9256	2.4158e-10	1.14894e-08	131.678	145.69	0	0
H2-DMb1	308.551	2.96194	1.56654	0.265099	2.43045e-10	1.1522e-08	169.742	129.602	533.846	401.013
Casp1	455.258	0.418948	-1.25516	0.211157	2.478e-10	1.171e-08	660.449	639.071	239.351	282.161
Fut2	664.066	9.7659	3.28775	0.562624	2.51475e-10	1.18458e-08	95.6726	125.133	797.835	1637.62
Slc39a10	894.6	0.492923	-1.02057	0.170599	2.5367e-10	1.19112e-08	1166.59	1254.9	560.831	596.077
Entpd5	992.314	1.96687	0.9759	0.163236	2.85601e-10	1.33681e-08	652.219	660.522	1324.64	1331.87
Colgalt1	5157.24	0.566847	-0.818968	0.136327	2.87183e-10	1.33998e-08	7062.28	6212.84	3719.32	3634.53
Gstt1	718.078	2.46502	1.3016	0.220881	3.31876e-10	1.54364e-08	365.202	438.859	838.9	1229.35
Ypel1	144.971	0.254278	-1.97552	0.339116	3.53437e-10	1.63877e-08	259.242	210.044	51.6246	58.9726
Alcam	3247.17	0.532451	-0.909279	0.152631	3.57424e-10	1.65208e-08	4504.84	4049.83	2001.63	2432.39
Gm38124	78.1426	6.42894	2.68458	0.462828	3.77832e-10	1.74097e-08	22.6322	16.0885	131.408	142.441
Cdhr2	970.09	2.25816	1.17515	0.199495	3.82894e-10	1.75337e-08	541.116	619.407	1135.74	1584.09
Arhgdig	66.9946	0.107978	-3.21119	0.556189	3.82343e-10	1.75337e-08	129.621	114.407	17.5993	6.35089
Tgoln1	4581.9	1.77827	0.830476	0.139218	3.84943e-10	1.75731e-08	3012.14	3486.74	5993.15	5835.56
Vbp1	1876.51	1.92132	0.942097	0.159211	4.26031e-10	1.9389e-08	1388.8	1134.24	2554.25	2428.76
Cndp2	1409.87	1.90196	0.927487	0.157137	4.47755e-10	2.03152e-08	916.605	990.337	1772.84	1959.7
Ebp	1609.92	1.93811	0.954653	0.161533	4.49498e-10	2.03319e-08	1029.77	1121.73	1954.7	2333.5
Scara3	1922.19	0.519267	-0.945452	0.160212	4.61364e-10	2.07451e-08	2643.85	2467.8	1154.51	1422.6
Tff2	368.022	0.0751763	-3.73358	0.651344	4.61438e-10	2.07451e-08	642.961	740.071	24.639	64.4162
Nupr1	961.013	0.493077	-1.02012	0.173827	5.0607e-10	2.26827e-08	1194.36	1406.85	627.709	615.129
Lipo3	62.9679	0.120512	-3.05275	0.529307	5.15814e-10	2.30496e-08	114.19	113.513	10.5596	13.6091
Casp4	671.517	0.463222	-1.11022	0.190147	5.37905e-10	2.39643e-08	854.881	1001.96	400.091	429.139
P2rx4	1633.79	2.33939	1.22613	0.210748	5.45461e-10	2.4228e-08	1011.25	891.124	1765.8	2866.97
Ramp1	85.1394	0.149432	-2.74244	0.478961	5.49786e-10	2.4347e-08	189.288	110.832	22.2925	18.1454
Dhrs11	269.995	2.71803	1.44256	0.249375	5.67375e-10	2.50509e-08	136.822	143.009	391.878	408.272
Net1	2869.75	0.563956	-0.826346	0.140108	5.81038e-10	2.55778e-08	3603.67	3798.67	1950	2126.64
Hmmr	1790.6	1.96188	0.972235	0.166043	5.95812e-10	2.61503e-08	1038	1331.77	2442.78	2349.83
Cacna2d1	379.341	0.398042	-1.32901	0.23072	6.84374e-10	2.99484e-08	610.041	489.805	208.845	208.672
1110002E22Rik	170.076	3.64386	1.86547	0.326341	7.01948e-10	3.06269e-08	58.638	79.5487	306.228	235.89
Shtn1	236.582	2.8509	1.51142	0.263591	7.36864e-10	3.20558e-08	116.247	119.77	343.773	366.537
Gstp1	4004.23	1.7233	0.785175	0.134032	7.96236e-10	3.4537e-08	2803.31	2996.04	4993.51	5224.06
Casc4	117.274	4.24451	2.0856	0.366829	8.06343e-10	3.48731e-08	38.0633	45.5841	199.459	185.99
Itga1	609.346	0.376743	-1.40835	0.246093	8.28769e-10	3.57385e-08	809.616	986.761	238.177	402.828
Soat1	2451.59	2.01554	1.01117	0.174673	8.37993e-10	3.60313e-08	1422.74	1759.9	2883.94	3739.77
Gm49980	226.654	0.053337	-4.22872	0.751204	8.65886e-10	3.71227e-08	370.345	497.85	9.3863	29.0327
Serpine1	1545.46	0.468554	-1.09371	0.190045	8.84053e-10	3.7792e-08	2500.86	1757.22	1021.93	901.827
Pola1	1019.02	1.99899	0.999273	0.172798	9.03837e-10	3.85264e-08	603.869	726.664	1389.17	1356.37
Atp6ap2	1716.33	1.8212	0.864886	0.148846	9.26737e-10	3.9389e-08	1236.54	1157.48	2174.1	2297.21
Fetub	52.9997	13.1191	3.7136	0.652295	9.81439e-10	4.15945e-08	2.05747	10.7257	90.3431	108.872
Gipc2	1940.34	1.94551	0.960149	0.166564	1.04259e-09	4.40599e-08	1320.9	1262.95	2259.75	2917.78
Chm	834.734	2.03548	1.02537	0.179082	1.14819e-09	4.8247e-08	582.265	493.381	1102.89	1160.4
Myh14	135.193	5.25621	2.39402	0.426006	1.14626e-09	4.8247e-08	27.7759	51.8407	157.22	303.936
Slc43a3	3266.08	1.82413	0.867205	0.150203	1.15405e-09	4.83558e-08	2064.68	2482.99	4450.28	4066.39
Crebrf	1252.51	1.87303	0.905378	0.157231	1.17896e-09	4.926e-08	820.932	891.124	1644.95	1653.05
Trpa1	110.178	0.00321378	-8.28151	1.32098	1.20298e-09	5.0122e-08	223.236	216.301	1.17329	0
Arhgdib	74.8213	6.12615	2.61498	0.466631	1.21593e-09	5.0519e-08	20.5747	17.8761	122.022	138.812
Gm17552	43.6154	0.0291358	-5.10106	0.872919	1.27585e-09	5.28602e-08	87.4427	83.1239	1.17329	2.72181
Bcap31	2207.82	1.78538	0.836229	0.145529	1.43117e-09	5.91296e-08	1513.27	1607.06	2719.68	2991.27
Aup1	3075.75	1.74085	0.79979	0.138995	1.4692e-09	6.05318e-08	2242.65	2179.99	4128.8	3751.56
Arhgap24	95.2902	5.31749	2.41074	0.433787	1.58634e-09	6.51767e-08	29.8334	25.9204	126.715	198.692
Neat1	9696.95	1.65659	0.728214	0.127045	1.59444e-09	6.53278e-08	7334.9	7057.49	12608.1	11787.3
Prss22	108.989	0.185399	-2.43129	0.440001	1.60175e-09	6.54462e-08	217.064	155.522	43.4116	19.9599
Sema3c	5453.83	0.578964	-0.788455	0.137794	1.77473e-09	7.23142e-08	7470.69	6463.11	3993.87	3887.65
Angpt2	663.817	2.16221	1.11251	0.197776	1.90804e-09	7.75323e-08	434.127	384.336	822.474	1014.33
Antxr2	2223.87	0.550486	-0.861222	0.152013	2.07492e-09	8.36245e-08	2662.37	3131	1505.33	1596.8
Dctd	670.11	0.4811	-1.05559	0.187921	2.07034e-09	8.36245e-08	890.887	939.39	456.409	393.755
9930014A18Rik	252.158	0.368507	-1.44024	0.259125	2.07253e-09	8.36245e-08	388.863	359.31	124.368	136.091
Thsd7a	68.1861	0.143699	-2.79888	0.509084	2.14969e-09	8.64023e-08	139.908	101.894	16.426	14.5163
Ckap4	47.9463	0.074911	-3.73868	0.677714	2.20107e-09	8.82276e-08	77.1553	102.788	8.21301	3.62908
Tmem223	126.849	3.89259	1.96073	0.356543	2.32129e-09	9.27952e-08	55.5518	42.0089	202.979	206.858
Sqstm1	9679.53	1.86154	0.896495	0.159007	2.38856e-09	9.52269e-08	5627.19	7650.98	12501.4	12938.6
Kcnn4	1954.24	0.569746	-0.81161	0.143357	2.417e-09	9.61017e-08	2487.49	2536.62	1413.81	1379.05
Gcnt1	1004.21	1.90966	0.933318	0.166109	2.5569e-09	1.01392e-07	664.564	688.23	1393.87	1270.18
Slf2	2927.8	1.72451	0.786186	0.138873	2.633e-09	1.0413e-07	2088.34	2146.92	3897.66	3578.27
Cobl	565.614	2.3655	1.24214	0.22405	2.66463e-09	1.051e-07	266.443	383.443	865.886	746.684
Csf3	44.875	0.022505	-5.47361	0.959006	2.78392e-09	1.09513e-07	94.6438	81.3363	3.51986	0
Peli1	1115.91	2.10675	1.07502	0.193134	2.8217e-09	1.10705e-07	618.271	782.08	1334.03	1729.26
Cldn2	12940.5	0.599885	-0.737242	0.130037	2.99809e-09	1.17314e-07	16257.1	16337.9	8995.59	10171.4
C2cd4c	162.044	0.269958	-1.88919	0.346219	3.1588e-09	1.23276e-07	240.725	278.867	46.9315	81.6543
Enah	311.034	0.0335317	-4.89833	0.909973	3.20704e-09	1.2483e-07	592.553	619.407	5.86644	26.3108
Haus7	798.849	1.971	0.978925	0.176177	3.27393e-09	1.27099e-07	538.03	513.938	1018.41	1125.02
Ercc6l	1235.63	2.16442	1.11398	0.201663	3.39219e-09	1.31345e-07	623.415	894.699	1898.38	1526.03
Celf2	101.307	4.59273	2.19935	0.406905	3.82031e-09	1.47536e-07	36.0058	31.2832	141.968	195.97
Rhov	83.0815	5.37649	2.42666	0.449357	3.88786e-09	1.49754e-07	23.661	24.1327	118.502	166.03
Rai14	2275.98	1.72625	0.787637	0.140949	3.95928e-09	1.52108e-07	1609.97	1678.57	2960.2	2855.18
Csnk1e	1420.59	0.529186	-0.918153	0.166057	4.0466e-09	1.5506e-07	1815.72	1939.56	1060.65	866.443
Phka1	504.193	2.1282	1.08964	0.199171	4.71679e-09	1.80274e-07	314.794	312.832	668.774	720.373
Jun	662.469	0.137276	-2.86485	0.539386	5.11407e-09	1.94954e-07	832.249	1532.88	111.462	173.289
Cxcl3	1402.2	0.113998	-3.13292	0.590983	5.14338e-09	1.95567e-07	2860.92	2244.35	156.047	347.485
Gtf3c5	1034.44	0.532678	-0.908666	0.165374	5.19648e-09	1.9708e-07	1391.88	1336.24	739.171	670.473
Ikbkg	3082.45	1.82589	0.8686	0.157721	5.27775e-09	1.9965e-07	2298.2	1983.35	4429.16	3619.1
Araf	1836.35	1.76794	0.822073	0.14888	5.30724e-09	2.00253e-07	1328.1	1280.82	2487.37	2249.12
Plp2	2873.29	1.85892	0.894462	0.162621	5.33739e-09	2.00603e-07	1711.82	2230.04	3613.72	3937.55
Twist1	102.761	0.229505	-2.1234	0.397095	5.34362e-09	2.00603e-07	153.282	186.805	32.852	38.1054
Nostrin	65.8968	0.153966	-2.69931	0.505501	5.36682e-09	2.00964e-07	126.535	105.469	15.2527	16.3309
Atp1b1	4799.16	0.552062	-0.857098	0.156049	5.82729e-09	2.17655e-07	6433.72	6061.79	2913.27	3787.85
Stx3	493.963	2.15816	1.1098	0.204651	5.97289e-09	2.22532e-07	299.363	308.363	732.131	635.997
Abcg2	597.004	2.04279	1.03054	0.189505	6.11848e-09	2.27383e-07	377.547	387.912	777.889	844.669
Slc17a1	182.756	3.20593	1.68074	0.314336	6.1786e-09	2.29042e-07	67.8967	96.531	258.123	308.472
Sema3a	64.7462	0.135629	-2.88227	0.546821	6.64327e-09	2.45651e-07	111.104	119.77	19.9459	8.16543
Rab3b	432.137	2.49448	1.31874	0.245767	6.83797e-09	2.5222e-07	203.69	272.611	529.153	723.094
Dock9	576.727	2.17499	1.12101	0.207949	7.12107e-09	2.62009e-07	304.506	400.425	827.167	774.809
Lbh	1377.45	0.50847	-0.975765	0.180213	7.24476e-09	2.65899e-07	1887.73	1806.38	1045.4	770.273
Igbp1	1790.16	1.74195	0.800702	0.146353	7.68048e-09	2.81193e-07	1297.24	1272.78	2228.07	2362.53
Rcor2	341.926	0.406302	-1.29938	0.243998	8.22188e-09	3.00271e-07	435.156	551.478	204.152	176.918
Cul4b	1717.5	1.77033	0.824016	0.151337	8.26154e-09	3.00976e-07	1236.54	1201.27	2089.62	2342.57
Asb17os	85.9983	254.863	7.99358	1.33193	8.40264e-09	3.04618e-07	1.02874	0	204.152	138.812
Pate14	39.1127	0.0331229	-4.91603	0.896288	8.40268e-09	3.04618e-07	86.4139	66.1416	1.17329	2.72181
Tox3	163.273	3.51712	1.81439	0.344178	8.52589e-09	3.08329e-07	79.2128	57.2036	210.018	306.657
Ugt2b5	194.974	2.99148	1.58086	0.298767	8.59426e-09	3.10043e-07	96.7013	89.3806	258.123	335.69
Nrp1	101.339	0.228887	-2.12729	0.404755	8.86597e-09	3.19067e-07	148.138	187.699	30.5055	39.0126
Zfp266	2085.41	0.585303	-0.772745	0.142209	9.59307e-09	3.44396e-07	2700.44	2609.91	1497.11	1534.19
Bok	1827.33	0.514761	-0.958024	0.178565	9.8249e-09	3.51865e-07	2818.74	2063.8	1271.84	1154.96
Fscn1	2699.38	0.511368	-0.967567	0.181404	1.00427e-08	3.58797e-07	2942.19	4295.63	1758.76	1800.93
Creg1	2150.11	1.76862	0.822626	0.152212	1.03408e-08	3.68001e-07	1399.08	1652.65	2704.43	2844.29
Ltn1	1444.34	1.81622	0.860936	0.159606	1.03501e-08	3.68001e-07	978.329	1035.03	1743.5	2020.49
Wdr13	1501.92	1.78859	0.838821	0.155634	1.084e-08	3.84497e-07	1105.89	1010	1854.97	2036.82
Dcp1b	42.6036	0.00202109	-8.95065	2.85365	1.11156e-08	3.93328e-07	65.8392	104.575	0	0
Ephb4	3625.92	0.603442	-0.728712	0.134629	1.1866e-08	4.18877e-07	4460.61	4662.98	2612.91	2767.17
Vamp8	4545.69	1.72443	0.78612	0.145802	1.20045e-08	4.22758e-07	3555.32	3012.12	5492.16	6123.17
Mical1	82.3608	0.201399	-2.31187	0.445039	1.21888e-08	4.28231e-07	132.707	146.584	21.1192	29.0327
Tspan15	2585.12	1.6759	0.744933	0.138026	1.25129e-08	4.38573e-07	1944.31	1862.69	3258.22	3275.25
Srsf7	5516.19	0.548552	-0.866299	0.162103	1.30144e-08	4.55072e-07	8238.13	6165.47	3630.15	4031
Pik3ip1	143.52	0.289895	-1.7864	0.343777	1.31189e-08	4.57645e-07	247.926	205.575	51.6246	68.9525
Itih5	615.867	2.08113	1.05737	0.199827	1.3312e-08	4.63289e-07	363.144	414.726	763.81	921.787
Timp1	370.262	2.46726	1.30291	0.248796	1.37176e-08	4.76283e-07	175.914	234.177	601.896	469.059
Clcn5	1213.56	2.00168	1.00121	0.189193	1.44451e-08	5.00368e-07	655.306	920.62	1694.23	1584.09
Atp6v1f	3041.83	1.70367	0.768649	0.143552	1.53679e-08	5.29963e-07	2364.04	2066.48	3755.69	3981.1
Tead2	793.773	0.512597	-0.964103	0.182548	1.53711e-08	5.29963e-07	1099.72	1024.3	570.218	480.853
Rbp2	536.836	0.427039	-1.22756	0.235097	1.57161e-08	5.40596e-07	882.657	646.221	262.816	355.65
Cdc42se2	5223.36	1.66977	0.739651	0.138101	1.62361e-08	5.57187e-07	3770.32	3939.89	7057.32	6125.89
Rnf145	2513.39	0.577171	-0.792929	0.148788	1.62813e-08	5.57447e-07	2977.17	3459.03	1869.05	1748.31
Cdk16	2536.26	1.79259	0.842047	0.158574	1.67847e-08	5.73355e-07	1578.08	1986.04	3171.4	3409.52
Bicdl1	289.637	2.43882	1.28618	0.247492	1.70727e-08	5.8185e-07	176.943	147.478	417.69	416.437
Syne1	896.363	0.454261	-1.13841	0.218001	1.71157e-08	5.81974e-07	1208.77	1294.23	416.517	665.936
Bpifb4	59.5498	7.92014	2.98553	0.585483	1.7537e-08	5.94931e-07	17.4885	6.25664	125.542	88.9125
Fam83b	103.779	4.06169	2.02208	0.394508	1.82277e-08	6.16946e-07	33.9483	42.0089	151.354	187.805
Cemip	290.732	2.62536	1.39251	0.269158	1.83015e-08	6.18031e-07	122.42	184.124	411.824	444.562
B4galt4	432.857	0.460742	-1.11797	0.214939	1.92098e-08	6.47228e-07	575.064	626.558	283.935	245.87
Ccl9	150.521	3.46515	1.79292	0.350685	2.03669e-08	6.84652e-07	66.8679	59.885	187.726	287.605
Ephx2	187.292	0.329351	-1.6023	0.312622	2.06766e-08	6.93485e-07	304.506	269.929	70.3972	104.336
Hydin	45.3401	10.0685	3.33178	0.650847	2.07621e-08	6.94778e-07	4.11495	9.83186	82.1301	85.2834
Pard3b	75.4747	0.00486566	-7.68315	1.34445	2.11791e-08	7.07133e-07	112.132	188.593	1.17329	0
Serpinb6b	997.574	0.551343	-0.858979	0.163511	2.16285e-08	7.20512e-07	1296.21	1304.06	708.665	681.36
Cysltr1	35.3383	19.3495	4.27422	0.822225	2.19727e-08	7.30331e-07	2.05747	3.57522	70.3972	65.3235
Ophn1	53.3022	7.54765	2.91603	0.574413	2.23532e-08	7.41313e-07	10.2874	11.6195	111.462	79.8398
Hyal2	1042.37	0.489893	-1.02946	0.198274	2.27554e-08	7.52964e-07	1663.47	1173.57	634.748	697.691
Prxl2a	2066.88	0.57353	-0.80206	0.152529	2.30272e-08	7.60257e-07	2850.63	2458.86	1422.02	1536.01
Skil	1210.33	0.555326	-0.848593	0.16187	2.36027e-08	7.77521e-07	1499.9	1647.28	809.568	884.589
Apoa1	55.247	10.2925	3.36352	0.663902	2.53546e-08	8.33379e-07	4.11495	12.5133	61.0109	143.349
Psmd8	5972.25	0.626735	-0.674072	0.127331	2.54746e-08	8.35464e-07	7431.6	7374.79	4485.48	4597.14
Rdh10	5227.89	0.178595	-2.48524	0.496588	2.57646e-08	8.43108e-07	9818.27	8245.36	1880.78	967.15
Plaat3	36.1056	0.0370593	-4.75402	0.911073	2.7875e-08	9.10154e-07	81.2703	58.9912	2.34657	1.81454
Clock	1867.41	1.74845	0.806073	0.154199	2.8191e-08	9.18443e-07	1247.86	1420.26	2526.09	2275.43
Myo10	790.617	0.533867	-0.905449	0.174588	2.87248e-08	9.33776e-07	1011.25	1075.25	527.979	547.991
Pcx	972.05	1.86374	0.898202	0.173388	3.04826e-08	9.88747e-07	613.127	714.151	1335.2	1225.72
Ppp1r9a	33.8512	27.193	4.76516	0.916334	3.16592e-08	1.02466e-06	2.05747	1.78761	68.0507	63.5089
Hip1	39.313	0.074305	-3.7504	0.742245	3.49192e-08	1.12771e-06	60.6955	87.5929	3.51986	5.44362
2010300C02Rik	39.2436	0.0694993	-3.84686	0.769091	3.6287e-08	1.16933e-06	73.0404	75.0797	7.03972	1.81454
Slco2a1	4402.48	1.94081	0.956659	0.186586	3.65112e-08	1.17399e-06	2567.73	3272.22	4825.73	6944.25
Smcr8	1446.84	1.867	0.900725	0.174952	3.79415e-08	1.21734e-06	853.852	1119.94	1978.16	1835.41
Dpysl3	456.255	0.479742	-1.05967	0.208484	3.94364e-08	1.26256e-06	599.754	651.584	273.376	300.306
Mettl7a1	1862.83	1.69029	0.757274	0.14614	4.02113e-08	1.28459e-06	1330.16	1394.34	2292.6	2434.21
Gm47163	42.9579	0.0999158	-3.32314	0.667431	4.03533e-08	1.28635e-06	69.9541	88.4867	7.03972	6.35089
Slc35g2	37.3074	0.0511587	-4.28888	0.839989	4.16661e-08	1.32534e-06	74.0691	69.7168	0	5.44362
Tcf23	96.1223	3.97708	1.99171	0.401894	4.37686e-08	1.38923e-06	31.8909	39.3274	157.22	156.051
Tln2	36.7502	13.3978	3.74392	0.748116	4.42768e-08	1.40235e-06	3.08621	5.36283	66.8774	71.6744
Pbx1	2725.56	0.587144	-0.768214	0.149196	4.55862e-08	1.44074e-06	3404.09	3535.89	1805.69	2156.58
Scarf2	1121	0.513446	-0.961716	0.189359	4.5978e-08	1.45002e-06	1304.44	1698.23	671.12	810.192
Baiap2l2	46.9678	8.5331	3.09307	0.625462	4.66843e-08	1.46916e-06	7.20116	9.83186	69.2239	101.614
Hprt	1828.88	1.71917	0.781713	0.151452	4.69225e-08	1.47353e-06	1300.32	1346.96	2182.31	2485.92
Dusp22	250.653	2.4693	1.3041	0.260727	4.76219e-08	1.49232e-06	127.563	149.266	351.986	373.795
Prkar2b	873.01	0.509285	-0.973454	0.192253	4.90682e-08	1.53439e-06	1280.78	1065.42	508.033	637.811
Arhgef40	2389.26	0.604895	-0.725244	0.140759	4.94024e-08	1.54158e-06	3108.84	2902.19	1770.49	1775.53
Cox7b	4995.04	1.61654	0.692909	0.134265	5.04428e-08	1.57074e-06	3965.78	3560.92	6131.6	6321.86
mt-Rnr2	20899.1	0.625993	-0.675782	0.129616	5.11151e-08	1.58833e-06	26754.4	25014	15014.6	16813.5
Cyba	1506.08	0.566869	-0.818913	0.160624	5.15834e-08	1.59952e-06	2092.45	1795.66	1114.62	1021.59
Flrt2	34.7864	18.3122	4.19474	0.84477	5.72132e-08	1.77038e-06	5.14369	0.893806	66.8774	66.2307
Hmgcll1	63.131	0.00582067	-7.4246	1.342	5.89948e-08	1.82169e-06	119.334	132.283	0	0.90727
Steap3	138.581	3.21051	1.6828	0.342795	6.08029e-08	1.86972e-06	53.4943	69.7168	228.791	202.321
Plekhh1	658.942	1.91707	0.938905	0.186465	6.07992e-08	1.86972e-06	458.817	422.77	834.207	919.972
Rnf130	955.088	1.82138	0.865036	0.171119	6.28611e-08	1.929e-06	682.053	643.54	1167.42	1327.34
Abcc5	2672.47	1.65236	0.724526	0.141819	6.39616e-08	1.95871e-06	1878.47	2088.82	3420.13	3302.46
Sod1	6746.79	1.63084	0.705618	0.137873	6.44575e-08	1.96982e-06	4891.65	5217.14	7812.92	9065.45
Slc6a8	1019.67	1.83503	0.8758	0.173808	6.75556e-08	2.06024e-06	636.788	769.567	1370.4	1301.93
Abcb7	1146.22	1.7754	0.828143	0.163838	6.79633e-08	2.0684e-06	780.812	838.39	1399.73	1565.95
Fam3a	395.933	2.14206	1.099	0.221274	6.88233e-08	2.09028e-06	265.414	222.558	543.232	552.528
Erf	1496.45	0.58651	-0.769772	0.15188	6.90737e-08	2.09137e-06	1851.73	1960.12	1116.97	1056.97
C3	2157.63	0.184547	-2.43794	0.506656	6.9142e-08	2.09137e-06	3459.64	3969.39	401.264	800.212
Acp5	675.768	1.99325	0.995124	0.199382	6.98181e-08	2.10322e-06	492.765	386.124	858.846	965.336
Wdr81	811.506	1.91149	0.934694	0.186533	6.98087e-08	2.10322e-06	545.231	542.54	959.749	1198.5
Hsf2bp	378.215	2.31277	1.20962	0.245307	7.25859e-08	2.18215e-06	260.271	179.655	518.593	554.342
Zfp275	1159.2	1.74575	0.803845	0.159431	7.55149e-08	2.2656e-06	802.415	853.584	1526.45	1454.35
Porcn	598.822	1.92135	0.942123	0.188753	7.61496e-08	2.28002e-06	404.294	395.062	768.503	827.431
Pcolce2	886.846	0.539349	-0.890708	0.178118	7.65875e-08	2.2885e-06	1128.52	1203.96	660.561	554.342
Ugdh	23136.4	1.56719	0.64818	0.129053	8.01052e-08	2.38878e-06	18532.7	16916.2	27276.6	29820.2
Dpp7	924.655	1.94505	0.959808	0.192946	8.07672e-08	2.40368e-06	641.932	581.867	1059.48	1415.34
Col18a1	5587.23	0.633412	-0.658783	0.129533	8.1478e-08	2.41996e-06	6849.33	6949.34	4410.39	4139.87
Sh3bgrl	3003.2	2.01448	1.01041	0.204053	8.32637e-08	2.46683e-06	2386.67	1484.61	3655.96	4485.54
Klhl34	31.7093	0.00293285	-8.41348	2.80771	8.33895e-08	2.46683e-06	60.6955	66.1416	0	0
Itih2	907.886	1.9988	0.999131	0.201524	8.38616e-08	2.47584e-06	500.995	675.717	1099.37	1355.46
6330403L08Rik	158.126	0.347283	-1.52582	0.314752	8.71728e-08	2.56847e-06	242.782	235.965	73.9171	79.8398
Ccng1	1626.1	1.68309	0.751114	0.149343	8.97483e-08	2.63386e-06	1206.71	1176.25	1987.55	2133.9
Tubgcp6	677.871	1.89464	0.921925	0.185552	8.96327e-08	2.63386e-06	448.529	464.779	956.229	841.947
Fbp2	114.093	0.259934	-1.94378	0.40384	9.15412e-08	2.68116e-06	158.426	211.832	31.6788	54.4362
Gpd1	366.073	2.66957	1.4166	0.292142	9.26913e-08	2.70948e-06	234.552	145.69	423.557	660.493
Lratd2	1123.34	0.575502	-0.797108	0.15959	9.51764e-08	2.77664e-06	1460.81	1422.94	824.821	784.789
Uap1l1	6491.23	1.62513	0.700556	0.138912	9.59329e-08	2.7825e-06	5129.28	4615.61	7578.26	8641.75
Pcyox1l	479.103	0.501826	-0.994741	0.201941	9.58748e-08	2.7825e-06	663.536	631.027	309.748	312.101
Glyat	116.593	3.56712	1.83476	0.381691	9.59418e-08	2.7825e-06	38.0633	56.3097	204.152	167.845
C1qtnf1	94.6442	0.244363	-2.0329	0.424268	9.98026e-08	2.88881e-06	142.994	168.035	25.8123	41.7344
Neu1	5220.99	1.68278	0.750849	0.150697	1.13039e-07	3.26556e-06	4214.74	3434	6210.21	7024.99
Gc	56.2484	6.40772	2.67981	0.565186	1.18806e-07	3.42547e-06	13.3736	13.4071	73.9171	124.296
Tmem37	642.907	1.90271	0.928059	0.189659	1.26716e-07	3.64364e-06	412.524	450.478	801.355	907.27
Dmbt1	203.003	2.72256	1.44496	0.301943	1.26866e-07	3.64364e-06	106.989	100.106	251.083	353.835
Fam234b	397.596	2.26501	1.17951	0.244507	1.27872e-07	3.6654e-06	242.782	225.239	660.561	461.801
Epas1	546.495	2.01475	1.0106	0.207764	1.31638e-07	3.76608e-06	311.707	391.487	701.626	781.16
Il5ra	111.452	3.91548	1.96919	0.416701	1.32228e-07	3.77565e-06	52.4656	31.2832	144.314	217.745
Rnd3	1091.57	0.56984	-0.811372	0.164798	1.34858e-07	3.84332e-06	1363.08	1451.54	733.304	818.358
Med14	1247.55	1.76374	0.818637	0.166384	1.37217e-07	3.90303e-06	802.415	965.31	1583.94	1638.53
Nab1	2061.68	1.65478	0.726642	0.146774	1.41244e-07	4.00987e-06	1465.95	1588.29	2489.72	2702.76
Cetn2	516.027	2.11396	1.07995	0.22412	1.48186e-07	4.19369e-06	372.403	269.035	660.561	762.107
Syce2	72.7742	4.66625	2.22226	0.473571	1.48286e-07	4.19369e-06	27.7759	18.7699	130.235	114.316
Itprid2	1681.45	1.69217	0.758879	0.155113	1.64285e-07	4.63729e-06	1193.34	1256.69	1984.03	2291.76
1700016C15Rik	662.001	1.91825	0.939787	0.194211	1.65787e-07	4.67077e-06	432.07	451.372	791.969	972.594
Gm47547	114.891	0.287636	-1.79768	0.384103	1.66694e-07	4.68739e-06	171.799	192.168	57.4911	38.1054
B3galt6	354.825	0.458747	-1.12423	0.23519	1.67089e-07	4.68958e-06	547.288	442.434	210.018	219.559
Idh3g	3113.98	1.59201	0.670853	0.135718	1.70068e-07	4.76416e-06	2373.3	2362.33	3975.1	3745.21
Zfp991	338.1	2.30911	1.20733	0.253912	1.74136e-07	4.86891e-06	232.495	159.991	496.3	463.615
Exoc4	1421.31	1.78994	0.839912	0.17273	1.79277e-07	5.00319e-06	875.455	1117.26	1756.41	1936.11
Mgat4a	370.24	2.08033	1.05681	0.220874	1.81431e-07	5.04425e-06	224.265	240.434	512.726	503.535
Nipbl	2134.96	1.64365	0.716904	0.146016	1.81135e-07	5.04425e-06	1498.87	1677.67	2714.99	2648.32
Psme4	2895.9	1.66195	0.732873	0.149797	1.90332e-07	5.28179e-06	1934.03	2341.77	3604.34	3703.48
Hmgcs2	51.82	0.145666	-2.77926	0.597015	1.94146e-07	5.3675e-06	80.2415	104.575	7.03972	15.4236
Tjp3	1086.99	0.48119	-1.05532	0.221309	1.94127e-07	5.3675e-06	1551.34	1433.66	509.207	853.741
Adamtsl4	162.268	0.362586	-1.46361	0.312649	2.0232e-07	5.58306e-06	229.408	256.522	83.3034	79.8398
Adpgk	1334.16	0.594547	-0.750137	0.154123	2.03121e-07	5.59473e-06	1736.51	1647.28	962.095	990.739
Dhdh	30.3552	19.2109	4.26386	0.895558	2.04902e-07	5.63329e-06	2.05747	2.68142	50.4513	66.2307
Scrn1	2101.35	1.74577	0.803863	0.166032	2.14131e-07	5.87609e-06	1371.31	1627.62	2425.18	2981.29
Id1	973.331	0.540434	-0.887809	0.184957	2.15428e-07	5.90074e-06	1381.59	1181.61	592.51	737.611
Slc25a5	9767.08	1.5778	0.657913	0.134213	2.18738e-07	5.98032e-06	7400.74	7540.14	12959	11168.5
Dnase1l1	497.815	1.93372	0.951379	0.199163	2.20672e-07	6.02208e-06	319.937	339.646	659.387	672.287
Plscr1	7578.06	0.638077	-0.648197	0.132494	2.30576e-07	6.26921e-06	9856.33	8814.71	5662.28	5978.91
1700052K11Rik	311.92	2.43518	1.28403	0.273822	2.302e-07	6.26921e-06	156.368	190.381	360.199	540.733
Nepn	49.2443	0.153055	-2.70787	0.589663	2.351e-07	6.38047e-06	80.2415	93.8496	12.9062	9.97997
Tns1	1396.83	1.78245	0.833861	0.17362	2.3951e-07	6.48827e-06	880.599	1082.4	1663.72	1960.61
Prkaa2	51.3376	0.00743598	-7.07126	1.35638	2.4006e-07	6.49128e-06	91.5576	112.619	1.17329	0
Casd1	57.0536	0.149565	-2.74115	0.603208	2.52108e-07	6.8046e-06	115.219	86.6991	19.9459	6.35089
Ehd2	2159.27	1.66108	0.732122	0.151455	2.55599e-07	6.88627e-06	1545.16	1643.71	2513.18	2935.02
Ngef	326.301	2.18294	1.12627	0.23984	2.59201e-07	6.97062e-06	196.489	198.425	409.477	500.813
Ecscr	1364.97	0.589572	-0.76226	0.158614	2.60864e-07	7.00261e-06	1721.08	1752.75	1060.65	925.416
Pou6f1	147.966	2.87168	1.5219	0.3292	2.65469e-07	7.11331e-06	75.0978	68.823	202.979	244.963
4930471E19Rik	119.578	0.318747	-1.64952	0.358697	2.72053e-07	7.26343e-06	181.058	189.487	55.1445	52.6217
Nptxr	298.906	0.447676	-1.15947	0.24819	2.71683e-07	7.26343e-06	382.69	457.628	186.553	168.752
Slc7a4	241.159	2.49742	1.32044	0.285008	2.83769e-07	7.56258e-06	157.397	105.469	346.12	355.65
Ano8	500.676	0.510578	-0.969796	0.205848	2.91562e-07	7.75628e-06	688.225	658.735	299.188	356.557
Il13ra2	34.048	0.0711457	-3.81308	0.829477	2.96993e-07	7.88658e-06	82.299	46.4779	4.69315	2.72181
Plcxd2	348.27	2.18025	1.12449	0.241489	3.11437e-07	8.25531e-06	188.259	232.389	531.499	440.933
Fyn	32.0943	0.0630901	-3.98644	0.859382	3.158e-07	8.35598e-06	47.3219	75.0797	2.34657	3.62908
Cd109	109.603	0.235226	-2.08788	0.45929	3.20424e-07	8.4632e-06	142.994	220.77	21.1192	53.529
Card10	1358.28	0.603247	-0.729179	0.152442	3.23913e-07	8.54009e-06	1704.62	1721.47	989.081	1017.96
Adsl	2439.81	0.611071	-0.710588	0.148369	3.26735e-07	8.59918e-06	3132.51	2987.99	1959.39	1679.36
Tdrkh	26.279	0.00375986	-8.0551	2.78705	3.31226e-07	8.70189e-06	58.638	46.4779	0	0
Hs3st3b1	26.1314	0.00378069	-8.04713	2.78619	3.39261e-07	8.89719e-06	47.3219	57.2036	0	0
Gm9761	45.7954	0.137189	-2.86576	0.631477	3.43566e-07	8.99414e-06	76.1266	88.4867	5.86644	12.7018
Padi4	306.699	2.13814	1.09635	0.236205	3.47393e-07	9.07826e-06	185.173	191.274	421.21	429.139
Cpq	504.431	2.03688	1.02636	0.220498	3.54553e-07	9.24903e-06	365.202	277.974	632.402	742.147
Fam117a	195.423	2.51077	1.32813	0.289549	3.5524e-07	9.25063e-06	115.219	96.531	276.896	293.048
Hoxb6	31.5325	0.0564023	-4.1481	0.904535	3.56401e-07	9.26456e-06	53.4943	67.0354	4.69315	0.90727
Slfn9	654.073	1.83226	0.873622	0.185965	3.70835e-07	9.62285e-06	432.07	468.354	821.301	894.569
Chchd6	430.926	2.03392	1.02426	0.220516	3.77693e-07	9.76654e-06	256.156	293.168	533.846	640.533
Pik3c2g	511.537	2.33136	1.22117	0.265633	3.77153e-07	9.76654e-06	244.839	342.328	552.618	906.363
C330007P06Rik	1576.18	1.73826	0.79764	0.168852	3.81503e-07	9.84783e-06	1235.51	1018.04	2185.83	1865.35
Stim1	890.988	1.88528	0.914782	0.195701	3.86512e-07	9.95977e-06	504.081	696.275	1213.18	1150.42
Wasl	3789.36	1.57396	0.654396	0.136817	3.92759e-07	1.01031e-05	2862.98	2938.83	4429.16	4926.48
Slamf9	68.4348	4.58458	2.19679	0.489362	3.98558e-07	1.02345e-05	20.5747	23.2389	133.755	96.1707
Taf1	1566.59	1.66593	0.73633	0.155315	4.01259e-07	1.0286e-05	1075.03	1231.66	1938.27	2021.4
Stoml1	566.877	0.522973	-0.935192	0.200971	4.03488e-07	1.03252e-05	822.99	689.124	362.546	392.848
Chaf1b	1893.35	1.6325	0.707079	0.148809	4.06346e-07	1.03804e-05	1475.21	1352.33	2468.6	2277.25
Usp25	928.07	1.76756	0.821759	0.175011	4.16003e-07	1.06088e-05	617.242	693.593	1124.01	1277.44
Zfp978	79.0167	5.12213	2.35674	0.52716	4.29647e-07	1.09379e-05	11.3161	33.9646	161.914	108.872
Eif1b	973.946	0.585656	-0.771876	0.164238	4.42904e-07	1.1256e-05	1263.29	1223.62	695.759	713.115
Pde9a	447.148	0.463134	-1.1105	0.24231	4.46712e-07	1.13333e-05	578.15	667.673	217.058	325.71
Golph3	2639.96	1.58567	0.66509	0.139914	4.4901e-07	1.13721e-05	1936.08	2085.25	3192.51	3346.01
Mecom	601.562	0.539265	-0.890934	0.19272	4.5258e-07	1.14429e-05	738.633	849.115	404.784	413.715
Creb5	227.541	0.408441	-1.2918	0.284837	4.53834e-07	1.14439e-05	287.018	371.823	136.101	115.223
Cpn1	1335.69	1.74965	0.807063	0.1724	4.54165e-07	1.14439e-05	941.295	959.053	1513.54	1928.86
Sorbs2	2234.65	0.630213	-0.666089	0.140397	4.60014e-07	1.15715e-05	2820.8	2716.27	1709.48	1692.06
Pax9	708.017	0.5315	-0.911858	0.196754	4.63434e-07	1.16378e-05	914.547	963.522	414.17	539.826
Pkhd1l1	216.165	3.10333	1.63382	0.364426	4.78235e-07	1.19891e-05	63.7817	131.389	411.824	257.665
Tpm4	9002.88	0.655178	-0.610042	0.128012	4.80965e-07	1.20371e-05	11175.2	10768.6	7321.31	6746.46
Trim59	2266.09	0.628122	-0.670882	0.141927	4.84458e-07	1.21041e-05	2886.64	2736.83	1766.97	1673.91
Lonrf3	299.955	2.51185	1.32875	0.293716	4.85705e-07	1.21148e-05	115.219	208.257	411.824	464.522
Fnbp1l	2913.45	0.62588	-0.676043	0.143117	4.93574e-07	1.22903e-05	3865.99	3375.01	2188.18	2224.63
Efna1	1457.42	0.576816	-0.793818	0.170172	4.95415e-07	1.23154e-05	2031.76	1711.64	1134.57	951.727
Wdr44	273.092	2.1935	1.13324	0.249459	5.30977e-07	1.31773e-05	156.368	171.611	394.224	370.166
Cys1	115.301	3.60152	1.84861	0.41618	5.43043e-07	1.34317e-05	39.092	52.7345	132.581	236.798
Dnal4	646.92	0.549544	-0.863694	0.18703	5.42952e-07	1.34317e-05	895.001	799.062	439.983	453.635
Tbl1xr1	1427.48	0.584205	-0.775454	0.166328	5.51401e-07	1.36156e-05	1809.55	1839.45	918.684	1142.25
Wnt4	31.3263	47.1185	5.55822	1.15435	5.69114e-07	1.40296e-05	0	1.78761	44.5849	78.9325
Ripk2	298.163	0.469153	-1.09187	0.240977	5.72606e-07	1.40922e-05	405.323	420.982	191.246	175.103
Igfbp4	10712.6	0.646797	-0.628614	0.132559	5.815e-07	1.42873e-05	12868.5	13365.1	8872.4	7744.46
Ier5	2359.82	0.619718	-0.690317	0.147643	5.84449e-07	1.4336e-05	2752.9	3137.26	1836.19	1712.93
Tmem185a	656.295	1.79537	0.844281	0.183064	5.94449e-07	1.45571e-05	448.529	467.46	831.861	877.33
Rflnb	633.654	1.8349	0.875704	0.190602	6.05302e-07	1.47984e-05	432.07	437.965	895.218	769.365
Ptgr1	515.994	1.92056	0.941527	0.205979	6.07151e-07	1.48191e-05	328.167	357.522	628.882	749.405
Ubl4a	1340.52	1.64835	0.721025	0.154714	6.1034e-07	1.48724e-05	1025.65	961.735	1727.08	1647.6
Tlr2	178.571	0.392679	-1.34858	0.302266	6.27574e-07	1.52672e-05	256.156	268.142	85.65	104.336
Twist2	48.1551	5.99305	2.58329	0.58946	6.39507e-07	1.55319e-05	11.3161	12.5133	96.2095	72.5816
Fhod1	1068.47	0.595617	-0.747544	0.161305	6.43975e-07	1.56148e-05	1342.5	1368.42	759.117	803.842
Pcsk6	2077.5	1.62043	0.69638	0.149404	6.5089e-07	1.57566e-05	1444.35	1671.42	2589.44	2604.77
Fus	5325.16	0.609622	-0.714014	0.153792	6.64059e-07	1.60492e-05	6381.26	6999.39	4439.72	3480.29
Slc4a4	925.725	0.552603	-0.855685	0.187059	6.80404e-07	1.64174e-05	1335.3	1085.08	586.644	695.876
B630019K06Rik	62.1304	4.71189	2.2363	0.512364	6.84892e-07	1.64719e-05	23.661	15.1947	104.423	105.243
Fmc1	678.072	1.77778	0.830074	0.180956	6.84608e-07	1.64719e-05	470.133	482.655	857.673	901.827
Scn8a	347.65	2.03442	1.02462	0.227079	6.99531e-07	1.67967e-05	231.466	210.938	464.622	483.575
Xkr9	344.149	2.12856	1.08988	0.2432	7.34592e-07	1.761e-05	242.782	180.549	466.968	486.297
Slit2	124.243	0.317367	-1.65578	0.37728	7.44334e-07	1.78146e-05	190.316	196.637	41.0651	68.9525
Eno2	259.098	2.43087	1.28147	0.28891	7.60051e-07	1.81614e-05	129.621	157.31	300.362	449.099
Pdlim1	521.89	0.499149	-1.00246	0.222929	7.6229e-07	1.81855e-05	600.783	816.044	313.268	357.465
Slc15a2	364.028	0.489817	-1.02968	0.229582	7.79844e-07	1.85744e-05	522.599	472.823	211.192	249.499
Gstm5	1299.47	0.601436	-0.733517	0.159659	8.0304e-07	1.90961e-05	1721.08	1564.16	912.817	999.812
Spry3	30.8093	0.0656938	-3.9281	0.884388	8.07098e-07	1.91618e-05	44.2357	73.2921	1.17329	4.53635
Rassf4	162.168	0.337991	-1.56494	0.357491	8.16796e-07	1.9361e-05	240.725	256.522	51.6246	99.7997
Cltb	1702.72	1.61811	0.69431	0.150505	8.22916e-07	1.94748e-05	1222.14	1333.56	2053.25	2201.95
Aifm1	1560.06	1.62469	0.700164	0.151539	8.32423e-07	1.96683e-05	1201.57	1136.03	1874.91	2027.75
Gm47604	31.8883	0.0872259	-3.5191	0.806231	8.35186e-07	1.96763e-05	50.4081	68.823	4.69315	3.62908
Cxcl16	1008.02	0.552148	-0.856872	0.189139	8.35423e-07	1.96763e-05	1442.29	1195.02	613.629	781.16
Entpd2	286.501	2.33623	1.22418	0.276953	8.44893e-07	1.98677e-05	182.087	145.69	335.56	482.668
S100a11	10447.8	0.647955	-0.626034	0.135075	8.72764e-07	2.0482e-05	11965.2	13634.1	7722.58	8469.37
Pde4c	114.536	3.45895	1.79034	0.412859	8.73782e-07	2.0482e-05	52.4656	42.0089	131.408	232.261
Fbxo2	335.1	0.485669	-1.04195	0.234121	8.83527e-07	2.06776e-05	479.392	438.859	225.271	196.878
Itgb7	1201.12	4.39188	2.13484	0.4966	9.00813e-07	2.10488e-05	330.225	465.673	2574.19	1434.39
Znrf2	2202.26	1.6317	0.706379	0.154	9.08336e-07	2.11912e-05	1652.15	1634.77	2499.1	3023.02
Rgs16	30.6	0.0792052	-3.65826	0.838532	9.31224e-07	2.16909e-05	47.3219	67.9292	3.51986	3.62908
Il13ra1	83.343	3.81037	1.92993	0.447945	9.38314e-07	2.18217e-05	38.0633	25.0266	119.675	150.607
Golim4	1391.04	0.606481	-0.721465	0.158572	9.46568e-07	2.19791e-05	1631.58	1875.2	1023.11	1034.29
Tmem56	234.153	0.422278	-1.24373	0.283288	9.52611e-07	2.20848e-05	321.995	351.266	109.116	154.236
Washc2	1865.68	1.59093	0.669868	0.146088	1.00094e-06	2.3169e-05	1383.65	1448.86	2238.63	2391.56
Slc36a1	338.981	2.01354	1.00973	0.227536	1.00795e-06	2.32948e-05	222.207	211.832	464.622	457.264
Mars	4108.21	0.645333	-0.631885	0.137421	1.02418e-06	2.36329e-05	5300.05	4785.43	3057.59	3289.76
AC149090.1	5832.2	0.623006	-0.682682	0.149659	1.05701e-06	2.43523e-05	8050.9	6480.98	4609.85	4187.05
Fxyd5	83.4368	0.275045	-1.86226	0.435947	1.09176e-06	2.51139e-05	135.793	132.283	37.5452	28.1254
Plet1	29.1279	0.0386887	-4.69194	1.06261	1.12628e-06	2.58677e-05	70.9829	42.0089	3.51986	0
Ocrl	809.251	1.71652	0.779487	0.173559	1.17705e-06	2.69501e-05	578.15	586.336	993.774	1078.74
Sirt1	126.741	0.343849	-1.54015	0.359481	1.17695e-06	2.69501e-05	203.69	182.336	69.2239	51.7144
Ptprs	1751.86	0.594308	-0.750717	0.166903	1.21636e-06	2.78071e-05	1995.75	2456.18	1187.37	1368.16
Gstm4	35.0555	0.11693	-3.09628	0.726056	1.2253e-06	2.79683e-05	64.8105	63.4602	4.69315	7.25816
Grn	2751.79	1.63652	0.710629	0.157179	1.23125e-06	2.80607e-05	1826.01	2269.37	3278.16	3633.62
Nfib	1715.83	0.629023	-0.668815	0.147681	1.27539e-06	2.89774e-05	2107.88	2150.5	1349.28	1255.66
Gjb4	488.63	0.527745	-0.922087	0.209064	1.27343e-06	2.89774e-05	634.731	664.991	359.026	295.77
Bcl2l11	580.875	0.552621	-0.855639	0.194322	1.28545e-06	2.91612e-05	722.174	799.062	421.21	381.054
Pdgfb	655.335	0.549467	-0.863896	0.194921	1.28904e-06	2.91979e-05	772.582	944.752	465.795	438.212
Slc48a1	3332.05	1.58461	0.664128	0.146764	1.34022e-06	3.03107e-05	2361.98	2706.44	4385.75	3874.04
Zmym3	1360.59	1.62448	0.699978	0.155917	1.36627e-06	3.08315e-05	1024.62	1009.11	1616.79	1791.86
Rasgrp3	1551.58	0.580497	-0.784639	0.17606	1.36742e-06	3.08315e-05	2048.22	1934.2	949.189	1274.71
Snhg5	1168.92	0.580164	-0.785467	0.176569	1.39579e-06	3.14232e-05	1530.76	1467.63	943.323	733.982
Arhgef5	4958.84	1.51944	0.603541	0.132598	1.40663e-06	3.16193e-05	3698.31	4065.03	5977.9	6094.14
Acer2	28.9028	0.072213	-3.7916	0.883967	1.43393e-06	3.2184e-05	65.8392	43.7965	2.34657	3.62908
Slc4a1	35.3751	9.94587	3.3141	0.786928	1.46869e-06	3.29142e-05	5.14369	5.36283	37.5452	93.4488
Capn1	3011.51	1.637	0.711054	0.158619	1.48386e-06	3.3204e-05	2262.19	2219.32	3303.98	4260.54
Gm35019	1103.47	1.7177	0.780476	0.17581	1.52368e-06	3.40434e-05	831.22	756.159	1265.98	1560.51
Hoxa10	252.78	0.450997	-1.14881	0.267112	1.55962e-06	3.47939e-05	366.23	345.903	130.235	168.752
Lpcat3	2441.02	1.7314	0.791943	0.179609	1.69768e-06	3.78168e-05	1588.37	1900.23	2644.59	3630.9
Ncapg2	2117.74	1.59791	0.676186	0.151363	1.70549e-06	3.79337e-05	1553.39	1648.18	2837.01	2432.39
Shisa4	368.191	0.47322	-1.07942	0.250992	1.71446e-06	3.80553e-05	518.484	502.319	180.686	271.274
Syt17	49.0216	0.18564	-2.42942	0.584341	1.7161e-06	3.80553e-05	73.0404	96.531	12.9062	13.6091
Zdhhc9	594.752	1.83218	0.873558	0.20012	1.76324e-06	3.90421e-05	378.575	437.071	716.878	846.483
Rilpl2	3035.53	0.640778	-0.642103	0.143678	1.78045e-06	3.93641e-05	4016.19	3463.5	2320.76	2341.66
Wars	3812.67	1.52579	0.609553	0.135944	1.87679e-06	4.14323e-05	2870.18	3079.16	4473.74	4827.59
Elk1	666.362	1.74934	0.806807	0.184445	1.89559e-06	4.17849e-05	452.644	491.593	892.872	828.338
0610030E20Rik	818.704	1.70121	0.766564	0.174552	1.89888e-06	4.17951e-05	578.15	606	993.774	1096.89
Natd1	557.989	1.8079	0.854317	0.196217	1.92289e-06	4.22607e-05	378.575	394.168	681.68	777.531
Herc3	796.437	1.96001	0.970861	0.225715	1.9908e-06	4.36882e-05	514.369	524.664	824.821	1321.89
Rab10os	142.969	2.71078	1.43871	0.343878	1.99877e-06	4.37982e-05	82.299	61.6726	234.657	193.249
Urb1	573.241	1.84271	0.881827	0.2036	2.01371e-06	4.40603e-05	365.202	416.513	827.167	684.082
Fam20a	20.2078	0.00536477	-7.54227	2.76429	2.03032e-06	4.43582e-05	37.0345	43.7965	0	0
Fcrl1	20.3216	0.00534449	-7.54773	2.76678	2.04685e-06	4.46534e-05	47.3219	33.9646	0	0
Zfp52	971.657	0.554321	-0.851205	0.196413	2.06282e-06	4.49354e-05	1343.53	1195.02	783.756	564.322
Rpl39	22921.8	1.46593	0.551818	0.122393	2.07819e-06	4.51949e-05	18817.7	17936	26958.6	27974.8
Btg1	2874.72	0.573478	-0.80219	0.184345	2.08084e-06	4.51949e-05	2981.28	4435.06	1984.03	2098.52
Ogt	4389.23	1.49586	0.580973	0.13048	2.09721e-06	4.54837e-05	3484.33	3445.62	5434.67	5192.31
Lamc2	2083.88	1.67615	0.745151	0.170024	2.12962e-06	4.61189e-05	1303.41	1742.03	2560.11	2729.98
Rex2	26.8841	13.3975	3.74389	0.898213	2.1755e-06	4.70437e-05	4.11495	1.78761	48.1048	53.529
Ssbp3	1750.47	0.618896	-0.692231	0.157424	2.23136e-06	4.81811e-05	2035.87	2341.77	1234.3	1389.94
Ap1g2	399.581	1.99084	0.99338	0.232866	2.25587e-06	4.86392e-05	219.121	294.956	524.459	559.786
Tspan13	1491.39	1.79613	0.844893	0.195537	2.27628e-06	4.90079e-05	1045.2	1029.66	1558.13	2332.59
Cpne8	94.9195	0.292095	-1.77549	0.430931	2.30078e-06	4.94635e-05	130.65	171.611	29.3322	48.0853
Acbd7	398.898	1.89777	0.924305	0.215918	2.32837e-06	4.99839e-05	277.759	254.735	543.232	519.866
Selenbp1	2294.14	0.610556	-0.711804	0.16271	2.33789e-06	5.01156e-05	3174.68	2596.51	1566.34	1839.04
Hdac6	874.339	1.67946	0.747998	0.171731	2.38011e-06	5.09467e-05	661.478	614.938	1064.17	1156.77
Lzts2	2207.39	0.631873	-0.662293	0.150852	2.44767e-06	5.23171e-05	2930.87	2542.88	1603.88	1751.94
Pou2f2	81.2095	0.28718	-1.79997	0.441178	2.60629e-06	5.56273e-05	144.023	115.301	32.852	32.6617
Stx6	894.36	0.604835	-0.725386	0.167119	2.6503e-06	5.64849e-05	1123.38	1135.13	651.174	667.751
Yipf6	585.346	1.76416	0.818977	0.190672	2.66596e-06	5.67369e-05	422.811	401.319	789.622	727.631
Ccdc3	175.535	0.420284	-1.25056	0.301278	2.69319e-06	5.72341e-05	255.127	251.159	91.5164	104.336
Capg	11976.5	1.48326	0.568771	0.128347	2.72237e-06	5.77713e-05	9646.47	9394.79	13670	15195
Pxylp1	584.172	1.84071	0.880259	0.206441	2.74181e-06	5.81004e-05	384.748	412.938	673.467	865.536
Gm19276	64.9613	3.93201	1.97527	0.486854	2.78093e-06	5.88451e-05	24.6897	22.3451	110.289	102.522
Vstm5	429.33	2.17021	1.11783	0.2682	2.87534e-06	6.07558e-05	237.638	277.974	754.424	447.284
Gstp3	116.287	3.1578	1.65892	0.407898	2.9752e-06	6.27763e-05	53.4943	49.1593	130.235	232.261
Cp	7337.79	0.327386	-1.61094	0.397317	2.98025e-06	6.27934e-05	11088.8	11629.3	2445.13	4187.96
Slc16a2	154.844	0.401563	-1.3163	0.320061	2.99822e-06	6.30821e-05	217.064	235.965	77.437	88.9125
Ttr	377.932	2.37381	1.2472	0.302114	3.03271e-06	6.37171e-05	166.655	256.522	395.398	693.155
Dhx34	1210.12	1.59803	0.676292	0.155798	3.03832e-06	6.37443e-05	928.95	899.168	1493.59	1518.77
Rbfox2	2097.13	0.632636	-0.660552	0.152224	3.08719e-06	6.46779e-05	2585.22	2614.38	1456.05	1732.89
Ptbp2	1471.21	0.587487	-0.767371	0.179283	3.11419e-06	6.50594e-05	2102.74	1657.12	1165.07	959.892
Gpt	658.042	1.83494	0.875731	0.206878	3.11145e-06	6.50594e-05	436.185	463.885	736.824	995.276
Spon2	1052.97	0.516023	-0.954493	0.227404	3.14382e-06	6.55856e-05	1669.64	1162.84	553.792	825.616
Brcc3	756.354	1.73686	0.796484	0.186658	3.15694e-06	6.57667e-05	567.863	508.575	1057.13	891.847
Pdk3	318.367	2.14109	1.09834	0.264531	3.22407e-06	6.70707e-05	161.512	225.239	389.531	497.184
Fam102b	4101.73	0.640338	-0.643095	0.148013	3.2325e-06	6.71516e-05	4635.49	5478.13	2947.3	3346.01
Kcnh2	28.6036	0.0842962	-3.56839	0.872791	3.26777e-06	6.77891e-05	58.638	49.1593	1.17329	5.44362
Parp9	557.549	0.563956	-0.826346	0.196243	3.34183e-06	6.92284e-05	749.95	701.637	364.892	413.715
Plekho1	84.9778	0.290251	-1.78463	0.445064	3.36986e-06	6.97113e-05	147.109	123.345	42.2383	27.2181
Pcdh10	79.4532	3.77819	1.9177	0.478297	3.42851e-06	7.08256e-05	32.9196	26.8142	93.863	164.216
Efna4	255.83	0.478341	-1.06389	0.256901	3.44365e-06	7.10391e-05	341.541	365.566	150.181	166.03
Paqr8	794.485	1.87398	0.906107	0.21584	3.49623e-06	7.19231e-05	449.558	619.407	910.471	1198.5
Raph1	1923.48	1.64227	0.715691	0.16687	3.49199e-06	7.19231e-05	1297.24	1552.54	2185.83	2658.3
Slc25a39	7189.06	1.51002	0.594569	0.136288	3.52198e-06	7.23523e-05	5462.6	5828.51	8112.11	9353.05
Setd7	1053.98	0.616213	-0.698498	0.162763	3.52875e-06	7.23907e-05	1269.46	1371.99	797.835	776.623
Iqgap1	6738	1.61323	0.689953	0.160774	3.67766e-06	7.53411e-05	4376.25	5731.08	7768.33	9076.33
Atp6ap1	2720.36	1.52969	0.613243	0.141449	3.70349e-06	7.57654e-05	2105.83	2127.26	3512.82	3135.53
Cpne2	1805.61	0.638966	-0.646189	0.149947	3.72423e-06	7.60844e-05	2126.4	2331.04	1326.99	1438.02
Pnp2	36.5711	0.14747	-2.76151	0.696371	3.74754e-06	7.6455e-05	61.7242	68.823	9.3863	6.35089
Ace2	35.629	8.32199	3.05693	0.768865	3.77656e-06	7.67295e-05	6.17242	6.25664	37.5452	92.5416
Ppan	1503.71	0.598076	-0.7416	0.174382	3.7693e-06	7.67295e-05	2061.59	1753.65	1226.09	973.501
Plscr3	1116.04	0.597498	-0.742995	0.174734	3.77619e-06	7.67295e-05	1472.12	1363.05	726.265	902.734
Cenpk	457.763	1.96316	0.973181	0.234519	3.79974e-06	7.70947e-05	288.046	305.681	727.438	509.886
Cul1	5122.3	1.53565	0.618849	0.143353	3.94276e-06	7.98868e-05	3737.4	4210.72	6738.19	5802.9
Smtnl2	294.247	2.02746	1.01967	0.247108	3.97362e-06	8.0402e-05	177.972	194.85	369.585	434.583
Col4a2	1253.44	0.583252	-0.777809	0.184476	3.99263e-06	8.06762e-05	1580.14	1632.98	1043.05	757.571
Gbp3	42.8429	0.180494	-2.46998	0.623731	4.02809e-06	8.12817e-05	75.0978	74.1859	9.3863	12.7018
Tcaf1	33.6048	0.0122453	-6.35163	1.40544	4.03473e-06	8.13048e-05	82.299	50.9469	1.17329	0
Braf	865.7	1.74605	0.804098	0.191145	4.0787e-06	8.2079e-05	533.915	691.805	1187.37	1049.71
Kdelr3	664.872	0.547409	-0.869309	0.208619	4.11593e-06	8.27156e-05	843.565	903.637	530.326	381.961
Fam83d	764.957	1.67765	0.74644	0.176762	4.14138e-06	8.31142e-05	530.828	583.655	989.081	956.263
Ablim1	1186.44	1.62602	0.701347	0.16473	4.15052e-06	8.31848e-05	873.398	896.487	1372.75	1603.15
Cfh	80.0999	3.62431	1.85771	0.467698	4.18595e-06	8.37814e-05	22.6322	39.3274	111.462	146.978
Spata5	583.744	0.575405	-0.797349	0.190046	4.21315e-06	8.42118e-05	763.323	741.859	430.596	399.199
Ascc2	1332.33	1.60645	0.683878	0.160247	4.22713e-06	8.43772e-05	933.065	1070.78	1714.17	1611.31
Sgpp2	912.451	1.96911	0.977545	0.237147	4.30314e-06	8.56787e-05	477.334	704.319	982.041	1486.11
Ano6	2333.18	1.77729	0.829679	0.198912	4.30392e-06	8.56787e-05	1394.97	1865.37	2485.02	3587.35
Cdca7	1650.29	0.61525	-0.700756	0.165213	4.344e-06	8.63196e-05	2075.99	2062.9	1376.27	1086
1700066B19Rik	461.786	0.542997	-0.880985	0.212109	4.34779e-06	8.63196e-05	640.903	578.292	288.629	339.319
Rin2	954.588	0.562087	-0.831135	0.199165	4.36146e-06	8.64751e-05	1172.76	1313.89	551.445	780.253
AW549877	1669.02	1.73233	0.792714	0.189052	4.43674e-06	8.78497e-05	1392.91	986.761	1962.91	2333.5
Fgf13	17.9732	0.00633506	-7.30243	2.75763	4.45882e-06	8.8169e-05	37.0345	34.8584	0	0
Rnf103	809.715	1.71259	0.776183	0.184742	4.49e-06	8.86671e-05	552.432	611.363	940.976	1134.09
Chmp3	4114.64	1.51656	0.600798	0.139814	4.55318e-06	8.97949e-05	3359.86	3079.16	5312.64	4706.92
Zfp947	17.1254	157.225	7.29669	2.71912	4.59474e-06	9.04937e-05	0	0	34.0253	34.4763
Rapgef3	719.01	0.587954	-0.766226	0.182857	4.64945e-06	9.14495e-05	980.387	858.053	526.806	510.793
Bicd1	593.844	1.72809	0.789177	0.188962	4.79272e-06	9.41423e-05	439.271	408.469	747.384	780.253
Mfge8	4230.99	0.65883	-0.602022	0.140672	4.82169e-06	9.45857e-05	5212.61	5094.69	3569.14	3047.52
Pcbp4	790.195	0.598843	-0.739751	0.176488	4.94132e-06	9.6804e-05	1051.37	954.584	559.658	595.169
Gm26917	1155.66	0.536476	-0.898415	0.218477	5.00219e-06	9.78669e-05	1183.05	1881.46	709.839	848.298
Fat2	47.9926	5.40665	2.43474	0.624259	5.01654e-06	9.8018e-05	8.2299	16.9823	103.249	63.5089
Camk2n1	1314.02	0.594315	-0.7507	0.179448	5.02484e-06	9.80506e-05	1644.95	1701.81	814.261	1095.08
Exph5	256.724	2.16348	1.11335	0.275419	5.03745e-06	9.81673e-05	130.65	177.867	327.347	391.034
Acsf2	1328.21	1.79425	0.843378	0.203889	5.10177e-06	9.92899e-05	802.415	1041.28	1431.41	2037.73
Lix1l	1920.68	0.655216	-0.609959	0.14328	5.17743e-06	0.00010063	2325.98	2365.9	1466.61	1524.21
Zfp9	121.907	0.355761	-1.49102	0.378408	5.20908e-06	0.000101112	163.569	205.575	70.3972	48.0853
Aopep	492.437	0.53031	-0.915093	0.223607	5.22836e-06	0.000101353	752.007	559.522	346.12	312.101
Tmem151a	242.361	2.77911	1.47462	0.373078	5.28361e-06	0.00010229	97.73	139.434	220.578	511.7
Zc3h12c	393.259	1.86287	0.89753	0.218683	5.29317e-06	0.000102342	247.926	282.443	529.153	513.515
Cdc42se1	3511.96	0.668883	-0.580173	0.135812	5.33194e-06	0.000102957	4095.4	4405.57	2696.21	2850.64
Nnmt	31.3639	7.84843	2.9724	0.764595	5.566e-06	0.000107336	5.14369	6.25664	66.8774	47.1781
Snrk	940.83	0.614242	-0.703121	0.168041	5.60955e-06	0.000107953	1173.79	1189.66	664.081	735.796
Muc4	60.8716	4.36094	2.12464	0.547169	5.6126e-06	0.000107953	15.4311	24.1327	75.0904	128.832
Wfdc1	24.1046	14.0267	3.8101	0.962611	5.63838e-06	0.000108308	3.08621	1.78761	51.6246	39.9199
Mucl3	45.4812	5.04869	2.33591	0.60355	5.70556e-06	0.000109456	11.3161	14.3009	89.1698	67.138
Golm1	3102.67	0.665834	-0.586766	0.138141	5.81775e-06	0.000111464	3612.93	3912.19	2516.7	2368.88
Actg1	18946.2	0.632562	-0.660722	0.15742	5.94599e-06	0.000113774	23063.3	23930.7	12174	16616.7
Epdr1	882.281	1.6319	0.706557	0.169425	5.9677e-06	0.000114042	663.536	648.009	1065.34	1152.23
Mefv	36.1295	0.157035	-2.67084	0.691168	5.97865e-06	0.000114104	65.8392	62.5664	7.03972	9.0727
Plekha8	1242.61	1.58635	0.665708	0.15874	6.00792e-06	0.000114514	991.703	892.912	1513.54	1572.3
Igsf8	1375.2	0.628848	-0.669216	0.159754	6.02921e-06	0.000114772	1751.94	1668.73	963.269	1116.85
Acox2	392.62	1.89634	0.923214	0.227293	6.07353e-06	0.000115467	242.782	279.761	476.355	571.58
Gpr146	216.194	2.35556	1.23607	0.311768	6.09486e-06	0.000115724	95.6726	146.584	268.683	353.835
F2r	2660.74	0.602627	-0.730664	0.176343	6.10445e-06	0.000115758	3222.01	3513.55	2287.91	1619.48
Gm3336	160.937	2.38538	1.25422	0.317003	6.1746e-06	0.000116938	79.2128	99.2124	227.618	237.705
Uqcrq	4867.28	1.52144	0.605436	0.14323	6.19294e-06	0.000117135	3789.87	3806.72	6490.62	5381.93
Pik3r3	181.994	0.436167	-1.19705	0.302226	6.30326e-06	0.000118841	271.587	248.478	92.6897	115.223
Slc6a6	9631.4	1.58012	0.660038	0.157748	6.30606e-06	0.000118841	6471.79	8168.49	10782.5	13102.8
2410002F23Rik	1344.43	0.566976	-0.81864	0.199974	6.30723e-06	0.000118841	2005.01	1483.72	1080.6	808.378
4933439C10Rik	210.451	2.16554	1.11472	0.279833	6.37197e-06	0.000119908	117.276	134.965	307.401	282.161
Rida	1531.72	1.72718	0.788422	0.191908	6.48553e-06	0.00012189	1052.4	1133.35	1600.36	2340.76
Impdh1	2097.69	1.58366	0.663265	0.158991	6.63984e-06	0.000124632	1502.99	1679.46	2855.78	2352.55
Add3	2117.91	1.63764	0.711619	0.172282	6.70279e-06	0.000125654	1443.32	1693.76	2316.07	3018.49
Slc36a4	39.8966	0.180746	-2.46797	0.646763	6.95794e-06	0.000130263	72.0116	67.0354	10.5596	9.97997
2810408A11Rik	214.55	0.459229	-1.12272	0.283895	6.96627e-06	0.000130263	329.196	273.504	118.502	136.998
Cdh9	40.7821	0.183478	-2.44632	0.640145	6.98379e-06	0.000130426	66.8679	75.0797	9.3863	11.7945
Eif4a2	4085.74	0.677966	-0.560716	0.133033	7.25542e-06	0.000135328	5111.8	4721.97	3251.18	3258.01
Fahd2a	180.117	2.25223	1.17136	0.298051	7.39702e-06	0.000137795	111.104	98.3186	245.217	265.83
Tcf3	3521.22	0.667296	-0.583602	0.139376	7.43814e-06	0.000138387	4533.65	4004.25	2720.85	2826.15
Rnf125	25.8621	0.0855849	-3.5465	0.91977	7.46507e-06	0.000138713	59.6668	37.5398	3.51986	2.72181
Vps26c	2103.06	1.52909	0.612675	0.146833	7.62718e-06	0.000141548	1684.04	1586.5	2429.88	2711.83
Ctnnb1	32122	0.684239	-0.547428	0.128212	7.67265e-06	0.000142213	39060.1	37759.7	24214.3	27454
Onecut3	216.676	0.452323	-1.14458	0.292001	7.79231e-06	0.00014425	258.213	353.053	130.235	125.203
Slc41a2	206.556	2.21341	1.14627	0.292137	7.80297e-06	0.000144267	133.736	109.938	260.47	322.081
4930402H24Rik	1148.58	0.593933	-0.751628	0.184309	7.86113e-06	0.00014498	1391.88	1536.45	713.359	952.634
Flot2	2907.5	1.51384	0.598217	0.143256	7.85583e-06	0.00014498	2141.83	2409.7	3393.15	3685.33
Susd3	108.755	2.85309	1.51253	0.393623	7.87991e-06	0.000145145	62.753	41.1151	156.047	175.103
Gpkow	1313.79	1.61463	0.691204	0.168364	8.10031e-06	0.00014902	1063.71	901.85	1759.93	1529.66
Ddr2	261.311	2.00665	1.00479	0.25368	8.12185e-06	0.00014923	164.598	168.035	337.907	374.703
Akr1b10	380.214	1.85174	0.888881	0.221988	8.21944e-06	0.000150836	242.782	271.717	481.048	525.31
Clcn7	1279.26	1.58254	0.662239	0.160682	8.30634e-06	0.000152242	906.318	1035.03	1541.7	1633.99
Tab3	417.496	1.80836	0.854683	0.213119	8.45506e-06	0.000154776	303.478	271.717	554.965	539.826
Igsf3	1494.49	0.644032	-0.634795	0.154104	8.58078e-06	0.000156883	1770.46	1910.06	1201.45	1095.98
Rapgef6	1485.91	1.57962	0.659577	0.160386	8.7437e-06	0.000159664	1058.57	1198.59	1961.74	1724.72
Gadd45g	73.9328	0.263702	-1.92302	0.510541	8.80076e-06	0.000160508	81.2703	159.991	28.1589	26.3108
S100g	87.2419	3.04645	1.60713	0.422216	8.84809e-06	0.000161173	39.092	39.3274	120.849	149.7
Rhoc	3190.63	0.679078	-0.558351	0.13386	8.87348e-06	0.000161436	3839.25	3835.32	2592.96	2494.99
Hpx	148.253	2.50972	1.32752	0.344997	8.91449e-06	0.000161945	84.3565	73.2921	179.513	255.85
Strn	1147.61	1.57314	0.653648	0.159032	8.92336e-06	0.000161945	840.478	908.106	1413.81	1428.04
Eif2s3x	2726.62	1.52814	0.61178	0.147955	8.98377e-06	0.000162842	2038.96	2199.66	3594.95	3072.92
Lfng	111.564	0.349292	-1.51749	0.399857	9.09075e-06	0.000164579	195.46	144.796	63.3575	42.6417
Hint1	14047.6	1.4554	0.541416	0.130245	9.24119e-06	0.000167098	11911.7	10643.4	17418.6	16216.6
Mrc1	1432.63	0.603222	-0.729238	0.180177	9.32285e-06	0.000168369	1844.53	1782.25	1215.53	888.218
1110038B12Rik	4059.65	0.671541	-0.574452	0.138683	9.50477e-06	0.000171445	4936.91	4877.5	3436.56	2987.64
Gbp9	142.575	0.391915	-1.35139	0.354497	9.54042e-06	0.000171879	216.035	204.681	91.5164	58.0653
Alg5	956.902	0.612087	-0.708192	0.174742	9.64461e-06	0.000173544	1308.55	1100.27	727.438	691.34
Larp1	5109.48	1.47871	0.564343	0.135822	9.69796e-06	0.000174292	3790.9	4335.85	6136.29	6174.88
Tnfsf15	61.8525	3.86401	1.9501	0.521634	9.80004e-06	0.000175913	28.8046	16.0885	100.903	101.614
St3gal4	3073.09	1.47007	0.555887	0.133916	9.9093e-06	0.000177444	2480.29	2425.79	3706.41	3679.89
Kif11	2799.63	1.61236	0.689172	0.169614	9.90206e-06	0.000177444	1778.69	2411.49	3684.12	3324.24
Thoc2	1416.09	1.6487	0.721333	0.178573	1.00268e-05	0.000179331	1183.05	903.637	1910.11	1667.56
Mtmr3	2123.06	1.4956	0.580721	0.140253	1.00525e-05	0.000179572	1679.93	1672.31	2562.46	2577.56
Tax1bp1	5465.76	1.49547	0.580601	0.140627	1.00807e-05	0.00017986	3932.86	4689.8	6541.08	6699.28
Map6	73.8546	3.51031	1.8116	0.484291	1.02899e-05	0.00018337	26.7472	31.2832	146.661	90.727
Zzef1	1244.05	1.5644	0.645605	0.158224	1.0342e-05	0.000183857	900.145	1001.96	1541.7	1532.38
Gpr137b	761.979	0.591759	-0.756917	0.188902	1.03415e-05	0.000183857	1035.94	909	603.07	499.906
Kif4	796.723	1.74567	0.803777	0.201679	1.04697e-05	0.000185903	492.765	632.814	916.337	1144.98
Dsel	32.6143	6.7772	2.76069	0.744968	1.05384e-05	0.000186675	9.25864	4.46903	58.6644	58.0653
Atad2	4555.23	1.52012	0.604186	0.147135	1.05341e-05	0.000186675	3354.71	3752.2	6054.16	5059.85
Il18rap	320.222	0.442473	-1.17634	0.307457	1.05693e-05	0.000186997	477.334	432.602	247.564	123.389
Anp32a	2950.83	0.675849	-0.565228	0.137162	1.06399e-05	0.000188023	3500.79	3615.44	2257.4	2429.67
Ctsa	2073.51	1.55428	0.636246	0.15603	1.0811e-05	0.000190818	1479.32	1706.27	2371.21	2737.23
Ripply1	41.9731	0.177392	-2.49498	0.67396	1.10288e-05	0.000194431	93.6151	53.6283	7.03972	13.6091
Tmsb4x	15964.1	0.64973	-0.622089	0.15244	1.10572e-05	0.000194699	17971	21195.7	10932.7	13756.9
Vldlr	723.978	0.600489	-0.73579	0.183923	1.10893e-05	0.000195032	950.553	886.655	567.871	490.833
Sinhcaf	1827.28	0.618528	-0.693088	0.172103	1.11275e-05	0.000195471	2274.54	2304.23	1566.34	1164.03
Zfp850	251.651	0.483679	-1.04788	0.271704	1.115e-05	0.000195514	364.173	329.814	178.34	134.276
Hsd17b14	789.128	1.90455	0.929449	0.237604	1.11563e-05	0.000195514	494.823	549.69	783.756	1328.24
Trim47	1149.27	0.63928	-0.645479	0.159091	1.1215e-05	0.000196309	1366.16	1473.89	878.792	878.238
Zfp652	1274.76	1.57509	0.655431	0.161658	1.12477e-05	0.000196649	907.346	1032.35	1513.54	1645.79
Chrnb1	718.781	1.66895	0.73894	0.184746	1.13843e-05	0.000198802	506.139	542.54	980.868	845.576
Me2	2364.08	1.56248	0.643837	0.158875	1.17111e-05	0.000204268	1622.32	1994.97	2744.32	3094.7
Prdx4	1292.78	1.58629	0.665658	0.165022	1.19094e-05	0.00020728	1047.25	910.788	1506.5	1706.58
Nectin2	879.415	0.622804	-0.683149	0.169197	1.19118e-05	0.00020728	1065.77	1130.66	645.308	675.916
Srd5a1	960.167	1.6213	0.697147	0.173738	1.20213e-05	0.000208938	652.219	778.505	1181.5	1228.44
Pgp	2966.68	1.4971	0.582167	0.142816	1.21814e-05	0.000211473	2270.42	2403.44	3361.47	3831.4
Hspa1b	64.3493	0.204969	-2.28652	0.624135	1.22239e-05	0.000211963	53.4943	167.142	14.0794	22.6818
Spag9	2469.09	1.51061	0.595133	0.146171	1.24351e-05	0.000215372	1798.23	2069.16	2929.7	3079.28
Ndrg2	1078.13	0.634972	-0.655235	0.162749	1.24829e-05	0.000215948	1355.88	1317.47	779.063	860.092
Ccnd2	1098.49	1.66303	0.733814	0.184321	1.25316e-05	0.000216536	702.628	904.531	1287.1	1499.72
Lysmd2	174.172	0.446744	-1.16248	0.306107	1.25974e-05	0.00021742	248.954	245.797	90.3431	111.594
Sms	2850.44	0.670059	-0.57764	0.141764	1.26195e-05	0.000217546	3389.69	3509.97	2389.99	2112.13
Gm50397	287.522	0.47818	-1.06438	0.27882	1.26642e-05	0.000218062	385.777	410.257	217.058	136.998
Crbn	1510.62	1.54949	0.631793	0.155908	1.27881e-05	0.000219941	1246.83	1080.61	1839.71	1875.33
Fam3c	1321.43	0.627253	-0.67288	0.167932	1.28776e-05	0.000221223	1474.18	1818.89	985.561	1007.07
Olfml2b	485.854	1.81844	0.862703	0.220938	1.29918e-05	0.000222926	285.989	378.974	600.723	677.731
Nsf	1724.8	1.54597	0.628513	0.155616	1.31829e-05	0.000225943	1215.97	1442.6	2133.04	2107.59
Rasgef1a	54.3988	4.08495	2.03032	0.553816	1.32316e-05	0.000226514	17.4885	19.6637	71.5705	108.872
Suox	3213.05	1.54379	0.626475	0.15564	1.34484e-05	0.000229959	2531.72	2422.21	4419.77	3478.47
Cd63	9973.1	1.47949	0.565101	0.138781	1.3552e-05	0.000231464	8384.21	7460.59	12910.9	11136.7
Fkbp7	114.534	0.388392	-1.36442	0.366333	1.36703e-05	0.000233215	170.77	168.929	62.1842	56.2508
Ehd4	1424.63	1.59671	0.675103	0.168871	1.3875e-05	0.000236434	951.582	1194.12	1844.41	1708.39
Ghdc	493.229	1.72646	0.787818	0.201026	1.41493e-05	0.000240831	362.116	339.646	660.561	610.593
Sertad2	1192.33	1.73228	0.792669	0.202347	1.42112e-05	0.000241607	672.794	1018.94	1477.17	1600.42
Morf4l2	7759.13	0.693779	-0.527451	0.129226	1.42913e-05	0.00024269	9380.03	9113.24	6571.58	5971.65
Slc25a17	1926.27	0.657165	-0.605671	0.150767	1.44458e-05	0.000245032	2508.06	2198.76	1451.36	1546.9
Fcgbp	31.8377	0.146519	-2.77084	0.760837	1.45704e-05	0.000246333	48.3507	66.1416	4.69315	8.16543
Cirbp	742.823	0.606948	-0.720356	0.182488	1.45627e-05	0.000246333	1006.11	872.354	530.326	562.508
Atp6v0a1	2221.59	1.59273	0.6715	0.168583	1.45725e-05	0.000246333	1566.77	1785.82	2406.41	3127.36
Cand2	15.022	0.00824699	-6.92192	2.75608	1.46257e-05	0.000246951	28.8046	31.2832	0	0
Srgap1	50.1092	4.1493	2.05287	0.565083	1.47541e-05	0.000248835	18.5173	15.1947	75.0904	91.6343
Nxf3	24.6615	11.4382	3.51579	0.96576	1.53153e-05	0.000258006	5.14369	0.893806	56.3178	36.2908
Mecp2	1220.59	1.58626	0.665628	0.16758	1.53872e-05	0.000258922	842.536	1003.74	1450.18	1585.91
Cyp2c68	53.7334	4.1733	2.06119	0.570469	1.55199e-05	0.000260858	22.6322	13.4071	72.7438	106.151
Sv2a	202.056	2.16953	1.11739	0.297489	1.55479e-05	0.000261031	139.908	101	293.322	273.996
Lgals1	24303.3	0.680105	-0.55617	0.13559	1.58335e-05	0.000265526	30406.4	27891.2	21020.6	17895
Ctns	324.484	1.8749	0.906813	0.236628	1.59646e-05	0.000267421	213.977	219.876	397.744	466.337
Pole4	1766.97	1.52898	0.612567	0.153038	1.60338e-05	0.000268121	1402.17	1341.6	2317.24	2006.88
Tmem44	66.8757	0.268051	-1.89942	0.524016	1.60427e-05	0.000268121	120.362	98.3186	15.2527	33.569
Mmgt1	850.2	1.61166	0.688549	0.174615	1.63019e-05	0.000271839	649.133	622.089	1133.4	996.183
Avl9	1258.15	1.53138	0.614836	0.153969	1.62837e-05	0.000271839	974.214	976.929	1518.23	1563.23
Fundc2	2878.82	1.5176	0.601789	0.15043	1.64275e-05	0.000273626	2417.53	2076.31	3281.68	3739.77
Ptk7	63.1635	3.59172	1.84467	0.509537	1.6513e-05	0.000274739	21.6035	26.8142	84.4767	119.76
Limd2	1148.91	0.594751	-0.749642	0.19238	1.67027e-05	0.000277584	1590.43	1341.6	702.799	960.799
Sgsm2	611.358	1.69261	0.759248	0.194908	1.67638e-05	0.000278287	400.179	481.761	761.463	802.027
Ttc36	95.5014	2.93159	1.55169	0.426095	1.6804e-05	0.000278642	53.4943	34.8584	126.715	166.938
Galnt4	801.772	0.614928	-0.70151	0.178788	1.68919e-05	0.000279785	940.266	1076.14	573.737	616.944
Phldb2	2561.07	1.48361	0.569114	0.14164	1.70339e-05	0.000281822	1920.65	2138.88	3132.68	3052.06
Gstt2	21.1085	27.9422	4.80438	1.23913	1.71177e-05	0.000282892	2.05747	0	35.1986	47.1781
Washc5	3313.43	1.52912	0.612704	0.153572	1.73885e-05	0.000287045	2294.08	2852.13	3874.19	4233.32
Tmed6	45.2658	5.07833	2.34436	0.656052	1.74376e-05	0.000287535	13.3736	11.6195	48.1048	107.965
Myzap	305.137	0.526712	-0.924914	0.243803	1.75154e-05	0.000288496	385.777	430.814	217.058	186.898
Klhl1	75.1741	0.315809	-1.66288	0.461283	1.76288e-05	0.000290042	122.42	113.513	37.5452	27.2181
Tfec	54.536	3.88712	1.9587	0.545075	1.7858e-05	0.000293486	15.4311	23.2389	83.3034	96.1707
Ndufa4	9565.69	1.42375	0.509699	0.126117	1.79357e-05	0.000294109	7582.82	8002.24	11650.7	11027
Anks1b	52.3532	0.241945	-2.04725	0.571158	1.79217e-05	0.000294109	98.7588	75.9735	12.9062	21.7745
Uqcr10	2752.89	1.47123	0.557024	0.138931	1.8041e-05	0.000295508	2295.11	2093.29	3301.63	3321.52
Chsy1	614.833	0.577339	-0.792509	0.206353	1.82285e-05	0.00029825	693.369	895.593	409.477	460.893
Fzd5	1224.65	1.71141	0.775185	0.200599	1.83227e-05	0.000299459	724.231	1027.88	1400.9	1745.59
Habp2	255.384	7.03312	2.81417	0.804356	1.8501e-05	0.000302039	29.8334	70.6106	305.055	616.037
Prune2	43.8021	0.218399	-2.19496	0.616305	1.87108e-05	0.000305128	63.7817	84.9115	12.9062	13.6091
Syngr2	2138.59	1.49873	0.583744	0.146875	1.9292e-05	0.000314261	1609.97	1755.43	2466.25	2722.72
Mis18a	842.798	1.7205	0.782829	0.203837	1.95737e-05	0.000318497	639.875	560.416	1263.63	907.27
Cachd1	223.469	0.49758	-1.007	0.269691	1.96081e-05	0.000318706	302.449	309.257	136.101	146.071
Rp2	875.455	1.67774	0.746515	0.193691	2.02489e-05	0.000328761	721.145	550.584	1032.49	1197.6
Zfp422	671.02	1.68854	0.755774	0.196602	2.05312e-05	0.000332979	545.231	424.558	862.366	851.927
Gadd45b	635.394	0.602711	-0.730461	0.18957	2.07064e-05	0.000335452	803.444	808	500.994	429.139
Ptgis	20.0312	18.5152	4.21064	1.13043	2.07987e-05	0.000336579	1.02874	1.78761	32.852	44.4562
Kat2b	1190.36	1.57471	0.655086	0.167869	2.13669e-05	0.000345396	845.622	963.522	1372.75	1579.56
Arhgef9	14.1282	0.00906103	-6.78611	2.75779	2.17277e-05	0.000350463	28.8046	27.708	0	0
Ltbp3	4369.99	0.688961	-0.537506	0.135249	2.17138e-05	0.000350463	5225.99	5229.66	3306.32	3717.99
Map2	21.3215	0.0544498	-4.19893	1.13316	2.19661e-05	0.000353922	27.7759	54.5221	1.17329	1.81454
Cd99l2	1106.49	1.63608	0.710242	0.184272	2.22723e-05	0.000358465	734.518	900.956	1247.2	1543.27
Spry1	706.618	0.60313	-0.72946	0.19032	2.27272e-05	0.000365389	809.616	983.186	497.474	536.197
G0s2	19.8043	18.2344	4.18859	1.13367	2.30665e-05	0.000370442	1.02874	1.78761	32.852	43.549
Pakap	1312.52	1.58944	0.668522	0.172515	2.35559e-05	0.00037789	892.944	1087.76	1758.76	1510.61
Hook1	1446.2	1.53399	0.617289	0.158331	2.40244e-05	0.000384989	1203.62	1035.03	1815.08	1731.07
Nos2	132.828	0.0511098	-4.29026	1.29009	2.4077e-05	0.000385414	261.299	252.947	15.2527	1.81454
Vat1	2667.06	1.50957	0.594139	0.151851	2.41192e-05	0.000385673	1873.33	2299.76	3245.31	3249.84
Smarca1	185.977	2.1507	1.10481	0.303306	2.46183e-05	0.000393228	123.448	99.2124	238.177	283.068
Suv39h1	1652.97	1.5683	0.649203	0.168535	2.48533e-05	0.000396553	1141.9	1371.99	2236.29	1861.72
Prickle1	20.8848	0.0374068	-4.74055	1.23581	2.49416e-05	0.000397533	37.0345	44.6903	0	1.81454
Tuba4a	6851.94	1.50466	0.589438	0.151005	2.53712e-05	0.000403946	5175.58	5569.3	9347.58	7315.32
Mylk3	21.0696	0.0540212	-4.21033	1.1418	2.59444e-05	0.000412627	49.3794	32.177	0	2.72181
Abcc4	1265.13	1.68897	0.756143	0.199712	2.61118e-05	0.000414844	734.518	1090.44	1513.54	1722
Cenpi	1117.91	1.55848	0.640138	0.165876	2.6209e-05	0.000415942	814.76	894.699	1466.61	1295.58
Gm15398	107.916	2.63475	1.39767	0.395501	2.74469e-05	0.000435121	65.8392	42.9027	167.78	155.143
Masp1	879.212	1.61594	0.692378	0.18156	2.748e-05	0.000435178	591.524	718.62	1045.4	1161.31
E230025N22Rik	138.979	0.413748	-1.27317	0.357905	2.78068e-05	0.000439883	239.696	166.248	69.2239	80.7471
Fgfr4	170.087	2.35352	1.23482	0.346861	2.93805e-05	0.00046428	88.4714	100.106	184.206	307.565
Ldhd	217.757	2.23149	1.15801	0.323567	2.95523e-05	0.000466498	118.305	134.071	227.618	391.034
Arhgef2	2303.13	0.656723	-0.606644	0.15762	2.95976e-05	0.000466714	2502.92	3129.21	1822.11	1758.29
Bnip3	719.87	1.94941	0.963041	0.264269	2.98477e-05	0.000470156	423.84	505	1276.54	674.102
Pdlim2	574.964	1.64219	0.715625	0.189645	3.01932e-05	0.000475093	424.869	421.876	702.799	750.313
Zfp60	483.23	0.587749	-0.766727	0.20545	3.10407e-05	0.000487909	622.386	618.513	319.134	372.888
Oard1	1523.55	0.659892	-0.599698	0.156159	3.12025e-05	0.000489933	1992.66	1725.94	1206.14	1169.47
Tbc1d16	1514.05	0.668032	-0.582012	0.151094	3.14025e-05	0.000492549	1771.49	1902.91	1221.39	1160.4
Flywch2	43.978	0.222302	-2.16941	0.633498	3.18871e-05	0.000499622	77.1553	72.3982	8.21301	18.1454
Gstp-ps	2193.16	1.57261	0.653163	0.171621	3.19432e-05	0.00049997	1472.12	1860.9	2439.26	3000.34
Atp6v1e1	2797.7	1.44757	0.533633	0.137214	3.20487e-05	0.000501091	2185.04	2319.43	3272.3	3414.06
Dtx3l	431.282	0.579752	-0.786492	0.212001	3.228e-05	0.000504175	539.058	574.717	287.455	323.896
Rictor	1051.61	1.58041	0.660303	0.174354	3.27594e-05	0.000511122	716.001	875.036	1255.42	1360
Nbeal2	1996.1	1.69448	0.76084	0.204322	3.28321e-05	0.000511717	1366.16	1505.17	1959.39	3153.67
Ap1b1	2570.05	1.46626	0.552137	0.142816	3.31713e-05	0.000516459	1922.71	2178.2	3064.63	3114.66
Aldh3b1	2731.5	1.52413	0.607984	0.159017	3.3331e-05	0.000518401	2266.31	1977.99	2983.67	3698.03
2810429I04Rik	13.3693	0.00996493	-6.64892	2.76809	3.35125e-05	0.000520675	32.9196	20.5575	0	0
Adgrl2	945.484	0.59046	-0.760089	0.204722	3.39702e-05	0.000527234	1051.37	1371.99	581.95	776.623
Rpl14	23297.4	0.708481	-0.497198	0.127249	3.42488e-05	0.000531001	25918	29105.9	18762	19403.8
C1qtnf6	108.38	2.67802	1.42117	0.408892	3.43286e-05	0.00053168	47.3219	59.885	126.715	199.599
Aurkb	2117.66	1.51819	0.602349	0.157756	3.44133e-05	0.000532434	1509.16	1787.61	2767.78	2406.08
Lin28b	23.1404	0.019284	-5.69645	1.45593	3.44717e-05	0.00053278	49.3794	42.0089	1.17329	0
Gsta1	299.693	1.96505	0.974569	0.270668	3.48237e-05	0.00053766	201.633	183.23	328.52	485.39
Lifr	13.6896	0.00973031	-6.6833	2.78621	3.49166e-05	0.00053853	15.4311	39.3274	0	0
Gramd1a	768.039	0.582001	-0.780905	0.211655	3.50575e-05	0.000540141	881.628	1096.7	634.748	459.079
Efcab5	84.0508	2.77735	1.47371	0.426618	3.53433e-05	0.000543978	40.1208	40.2212	136.101	119.76
Sytl2	1209.19	1.60846	0.685682	0.182749	3.55759e-05	0.000546421	813.731	993.018	1343.41	1686.62
P2ry6	20.4564	0.0750898	-3.73524	1.06366	3.55582e-05	0.000546421	42.1782	35.7522	1.17329	2.72181
Gm19385	46.8357	0.216899	-2.20491	0.651669	3.56613e-05	0.000547164	102.874	57.2036	8.21301	19.0527
Zan	309.416	1.81061	0.856478	0.235173	3.60536e-05	0.00055261	209.862	212.726	417.69	397.384
Nr1h4	321.158	1.87458	0.906566	0.25048	3.65096e-05	0.00055902	215.006	212.726	366.066	490.833
Anln	3660.16	1.54391	0.626592	0.165171	3.67514e-05	0.00056214	2410.33	3223.96	4769.41	4236.95
Usp32	1478.72	1.49896	0.583966	0.153192	3.70167e-05	0.000565614	1139.84	1183.4	1703.61	1888.03
Gm33782	22.6818	0.0191014	-5.71018	1.45773	3.73136e-05	0.000569562	44.2357	45.5841	0	0.90727
Hddc2	595.72	1.62995	0.70483	0.189147	3.73991e-05	0.000570279	419.725	461.204	766.157	735.796
Frmd7	231.306	2.00233	1.00168	0.280723	3.77251e-05	0.000574658	123.448	168.035	326.174	307.565
Usp34	2855.16	1.45866	0.544646	0.141996	3.83343e-05	0.00058274	2156.23	2414.17	3546.85	3303.37
Rdm1	812.087	1.62209	0.697851	0.187845	3.83345e-05	0.00058274	660.449	544.328	1098.2	945.376
Amd1	2451.86	0.691962	-0.531234	0.138541	3.91706e-05	0.000594838	2923.67	2935.26	1917.15	2031.38
Retsat	1063.72	1.57652	0.656746	0.175501	3.968e-05	0.000601956	804.473	808	1174.46	1467.96
Mcts1	739.249	1.57811	0.658202	0.174783	4.01597e-05	0.000608609	565.806	555.947	911.644	923.601
Dgka	66.3836	0.322228	-1.63385	0.482046	4.02165e-05	0.000608846	102.874	105.469	28.1589	29.0327
Nucb1	3186.42	1.47744	0.563104	0.147883	4.0492e-05	0.00061239	2335.23	2720.74	3616.07	4073.64
Dtx4	1217.85	0.655097	-0.61022	0.161963	4.06482e-05	0.000614125	1463.89	1520.36	876.446	1010.7
Ugt2b1	19.2175	24.8202	4.63344	1.27533	4.08444e-05	0.000616459	1.02874	0.893806	50.4513	24.4963
B2m	5181.8	0.693045	-0.528979	0.138298	4.14051e-05	0.000621119	6362.74	6010.84	3867.15	4486.45
Abcd1	239.52	2.06518	1.04627	0.296611	4.12743e-05	0.000621119	135.793	159.097	263.99	399.199
Lysmd4	247.07	1.93837	0.954845	0.268177	4.13988e-05	0.000621119	179	141.221	321.481	346.577
Sall1	121.311	2.42283	1.27669	0.370007	4.11966e-05	0.000621119	77.1553	53.6283	174.82	179.64
Dpy19l1	1894.13	0.633188	-0.659293	0.176993	4.13678e-05	0.000621119	2638.71	2071.84	1592.15	1273.81
Trp63	20.5018	0.0775581	-3.68858	1.07328	4.13307e-05	0.000621119	48.3507	29.4956	2.34657	1.81454
Rbx1	2890.95	0.68691	-0.541808	0.142278	4.14846e-05	0.00062168	3655.1	3278.48	2218.69	2411.52
Ggcx	940.591	1.85786	0.893641	0.249004	4.17811e-05	0.000625491	560.662	698.956	890.525	1612.22
Cenpb	7233.4	0.706063	-0.50213	0.130708	4.21712e-05	0.000630054	8795.7	8327.59	5611.83	6198.47
Sec14l2	55.1775	3.54592	1.82616	0.54407	4.21676e-05	0.000630054	19.546	22.3451	104.423	74.3962
Nadk2	1270.76	1.52869	0.612292	0.162854	4.23431e-05	0.000631984	921.749	1046.65	1472.48	1642.16
Zfp647	19.5104	0.040906	-4.61154	1.25626	4.27522e-05	0.000637447	36.0058	40.2212	0	1.81454
Pak3	12.6862	0.0107386	-6.54105	2.76506	4.29872e-05	0.000640306	25.7184	25.0266	0	0
Antxr1	247.352	1.95286	0.965588	0.272298	4.33356e-05	0.000644846	159.454	159.097	289.802	381.054
Sik1	859.353	0.629394	-0.667965	0.180082	4.34262e-05	0.000645545	1078.12	1066.31	580.777	712.207
Mug1	13.3987	0.0101624	-6.62061	2.79665	4.36371e-05	0.000648028	13.3736	40.2212	0	0
Rspo3	12.7073	0.0107667	-6.53728	2.77257	4.55758e-05	0.00067614	19.546	31.2832	0	0
Lbp	2283.94	0.598401	-0.740816	0.203177	4.58325e-05	0.000678586	2657.23	3167.65	1277.71	2033.19
Taf13	566.112	0.611845	-0.708762	0.19475	4.57942e-05	0.000678586	764.352	667.673	414.17	418.252
Gclc	5718.87	1.47767	0.563319	0.149268	4.61422e-05	0.00068249	4573.77	4497.63	6082.32	7721.78
Pilrb2	327.479	0.556051	-0.84671	0.236511	4.62099e-05	0.000682808	466.018	395.062	222.925	225.91
Uxt	311.509	1.8035	0.850799	0.237492	4.62681e-05	0.000682986	202.661	223.451	427.077	392.848
2610008E11Rik	404.507	0.581144	-0.783034	0.216566	4.66391e-05	0.000687776	530.828	513.938	267.509	305.75
Ppp4r3b	2246.76	1.46191	0.547857	0.145077	4.79285e-05	0.000706086	1898.02	1691.97	2767.78	2629.27
Itpripl2	4784.39	0.698237	-0.51821	0.136636	4.80504e-05	0.000707177	5413.22	5973.3	4066.61	3684.42
Tarbp1	1020.34	1.52355	0.607435	0.163031	4.88048e-05	0.000717566	818.875	765.098	1219.05	1278.34
Nox1	22.6217	0.0202275	-5.62754	1.49092	4.97882e-05	0.000731298	26.7472	62.5664	1.17329	0
Clip2	990.12	0.639857	-0.644177	0.174824	5.04829e-05	0.000740461	1208.77	1242.39	830.687	678.638
Nlrp1b	19.7353	16.7341	4.06472	1.19626	5.05121e-05	0.000740461	3.08621	0	50.4513	25.4036
Traf1	198.502	0.448949	-1.15538	0.338367	5.08278e-05	0.000743237	310.679	253.841	147.834	81.6543
Nfix	1247.35	0.602018	-0.732121	0.202	5.08335e-05	0.000743237	1327.07	1846.6	789.622	1026.12
Plod2	1860.68	1.5402	0.623114	0.168283	5.08522e-05	0.000743237	1496.81	1367.52	2582.41	1995.99
Itga5	939.075	0.638775	-0.646621	0.175599	5.09244e-05	0.000743557	1055.48	1271.89	712.185	716.744
Nedd9	1164.65	0.636534	-0.651692	0.177202	5.1135e-05	0.000745896	1342.5	1549.86	787.276	978.945
Gas2l3	923.335	1.55785	0.639554	0.173388	5.15485e-05	0.000751186	647.076	762.416	1161.55	1122.29
Ids	946.052	1.60276	0.680562	0.186836	5.21891e-05	0.000759773	789.042	625.664	1091.16	1278.34
Lrrc8c	420.61	0.586606	-0.769535	0.214232	5.2346e-05	0.000761308	505.11	576.505	305.055	295.77
Tanc1	2394.54	1.51286	0.597283	0.160714	5.24502e-05	0.000761326	1763.26	1971.73	2590.62	3252.56
Slc30a4	2914.62	1.47408	0.559819	0.149482	5.24171e-05	0.000761326	2089.37	2539.3	3450.64	3579.18
Tmem71	89.1979	2.67375	1.41886	0.423622	5.29586e-05	0.000767951	40.1208	47.3717	151.354	117.945
Mad2l1	3419.07	1.49625	0.581353	0.156172	5.34212e-05	0.000773902	2773.48	2599.19	4659.12	3644.51
Psd4	239.988	1.90435	0.929298	0.265412	5.38346e-05	0.000779127	153.282	160.885	347.293	298.492
Rab3il1	54.7195	3.40014	1.76559	0.537528	5.54818e-05	0.000802182	22.6322	20.5575	78.6102	97.0779
A830082K12Rik	23.2364	0.112677	-3.14973	0.953002	5.56887e-05	0.000804387	38.0633	48.2655	1.17329	5.44362
Naip6	273.732	2.04716	1.03362	0.299768	5.59141e-05	0.000806854	155.339	183.23	282.762	473.595
Gm4544	53.1332	0.221721	-2.17318	0.667949	5.61979e-05	0.000810158	102.874	78.6549	4.69315	26.3108
Fkbp14	331.465	1.76161	0.816894	0.230114	5.63026e-05	0.000810878	220.15	241.327	427.077	437.304
Immt	6853.11	1.39908	0.484476	0.126814	5.64247e-05	0.000811846	5478.03	5823.14	8090.99	8020.27
Prdx2	5627.88	0.709256	-0.495621	0.131559	5.78935e-05	0.00083217	6970.72	6329.04	4514.81	4696.94
Tpi1	26079.6	1.42731	0.513301	0.13654	5.80243e-05	0.000833241	22003.7	20344.8	33725	28245.1
Tspan9	1869.24	1.48159	0.567147	0.152755	5.81434e-05	0.000834141	1405.26	1552.54	2113.09	2406.08
Serpinb9b	59.5221	3.20182	1.67889	0.511875	5.84555e-05	0.000837806	22.6322	26.8142	99.7294	88.9125
Shroom2	226.86	1.9512	0.964362	0.27856	5.90874e-05	0.000846042	127.563	163.566	293.322	322.988
Gm30042	174.599	0.467124	-1.09812	0.323192	5.94126e-05	0.000849876	289.075	202	102.076	105.243
Hipk3	1983.57	1.45351	0.53954	0.144967	6.11367e-05	0.000873694	1549.28	1631.2	2279.7	2474.13
Pdzd11	908.974	1.53299	0.616348	0.168454	6.14921e-05	0.000876735	723.202	680.186	1159.21	1073.3
Foxo4	794.967	1.54634	0.62886	0.171966	6.14636e-05	0.000876735	594.61	625.664	987.908	971.687
Med13	1691.23	1.53445	0.617722	0.168845	6.15273e-05	0.000876735	1138.81	1470.31	1991.07	2164.75
Pcdhgb8	24.4436	0.126074	-2.98766	0.922316	6.16246e-05	0.000877276	29.8334	59.885	3.51986	4.53635
Khk	1249.82	1.52943	0.612992	0.167626	6.25416e-05	0.000889474	1059.6	874.142	1476	1589.54
Adamts4	116.088	0.415905	-1.26567	0.379333	6.29408e-05	0.000894291	176.943	161.779	73.9171	51.7144
Cpeb4	363.305	1.97758	0.983734	0.286449	6.30146e-05	0.000894481	237.638	224.345	354.333	636.904
Jcad	776.382	1.54702	0.629489	0.172872	6.34249e-05	0.000899442	586.38	604.213	975.002	939.932
Ltbr	3804.48	1.44061	0.526685	0.141582	6.41931e-05	0.000909464	3024.49	3113.12	4179.25	4901.07
Skp2	924.214	1.55314	0.635184	0.174885	6.46849e-05	0.000915555	699.541	713.257	1242.51	1041.55
1500011B03Rik	326.144	1.76202	0.817227	0.23297	6.54351e-05	0.000925288	212.949	240.434	432.943	418.252
Egln3	1782.01	0.687508	-0.540551	0.146284	6.64862e-05	0.000939252	2113.03	2161.22	1370.4	1483.39
Adprh	961.787	0.654615	-0.611281	0.168278	6.74759e-05	0.000952325	1243.74	1116.36	720.398	766.643
Aldh1l2	373.205	0.53645	-0.898484	0.260628	6.75851e-05	0.000952877	402.236	593.487	275.722	221.374
Loxl4	573.551	1.60015	0.678204	0.189004	6.76439e-05	0.000952877	427.955	429.92	736.824	699.505
Mrgprb2	95.2101	3.02533	1.59709	0.492934	6.77813e-05	0.000953904	52.4656	31.2832	93.863	203.229
Adam22	36.0779	0.218733	-2.19276	0.685613	6.80838e-05	0.00095725	61.7242	61.6726	8.21301	12.7018
Vma21	809.052	1.66822	0.73831	0.208439	6.88066e-05	0.000966495	697.484	476.398	1068.86	993.461
Lgals3bp	3482.22	0.696858	-0.521064	0.140938	6.97778e-05	0.000979206	4076.89	4224.12	2609.39	3018.49
Slc17a9	82.2514	2.81465	1.49295	0.460498	7.12678e-05	0.000999167	49.3794	27.708	126.715	125.203
Plin2	3620.02	0.687457	-0.540659	0.147182	7.23827e-05	0.00101384	4426.66	4258.09	2611.74	3183.61
Ctsc	1777.56	1.46384	0.549755	0.149842	7.25528e-05	0.00101526	1425.83	1409.53	2003.97	2270.9
Dhrs9	158.353	2.33644	1.22431	0.37013	7.29306e-05	0.00101958	60.6955	113.513	200.632	258.572
Klhl5	426.119	1.68284	0.7509	0.213423	7.33491e-05	0.00102446	290.104	323.558	517.42	573.395
Mxd1	409.908	1.69373	0.760203	0.216708	7.45688e-05	0.00104052	272.615	314.62	508.033	544.362
Mks1	11.6238	0.0124089	-6.33248	2.77756	7.48845e-05	0.00104394	20.5747	25.9204	0	0
Gda	22.1309	0.12201	-3.03493	0.948217	7.5405e-05	0.0010502	43.207	38.4336	2.34657	4.53635
mt-Co1	133298	1.45721	0.54321	0.14826	7.58638e-05	0.0010556	92102.9	121137	159240	160712
Sun2	1192.94	0.672385	-0.572641	0.157549	7.60613e-05	0.00105735	1387.77	1503.38	931.59	949.005
Oxct1	7081.53	1.40066	0.486104	0.131944	7.62679e-05	0.00105923	5761.96	5863.36	7834.04	8866.75
Rnf181	2998.62	1.43922	0.525286	0.142931	7.67462e-05	0.00106487	2276.6	2561.65	3411.92	3744.3
Il1rn	195.698	0.425266	-1.23356	0.375687	7.72081e-05	0.00106994	291.133	278.867	62.1842	150.607
Med24	1435.74	1.48483	0.570293	0.156978	7.73282e-05	0.00106994	1070.92	1195.02	1654.33	1822.71
Tnfaip8l1	628.131	0.617715	-0.694987	0.196787	7.72919e-05	0.00106994	828.134	755.266	416.517	512.608
Mro	30.9108	5.03583	2.33223	0.741013	7.78823e-05	0.00107659	9.25864	7.15044	52.7979	54.4362
C130074G19Rik	1700.88	0.676572	-0.563684	0.155159	7.87472e-05	0.00108754	1918.6	2192.5	1278.88	1413.53
Mcc	511.07	0.607582	-0.718849	0.204669	7.92554e-05	0.00109353	617.242	678.398	404.784	343.855
Vangl2	11.7377	0.0124079	-6.3326	2.78913	7.94081e-05	0.00109462	30.8621	16.0885	0	0
Zfp988	48.8497	4.50626	2.17193	0.699287	8.18018e-05	0.00112656	24.6897	4.46903	80.9568	85.2834
Rad51ap1	1155.52	1.53006	0.613589	0.174911	8.46039e-05	0.00116407	893.973	879.505	1595.67	1252.94
Myo7a	238.089	0.46977	-1.08997	0.329955	8.49522e-05	0.00116778	298.334	371.823	96.2095	185.99
Gm3776	84.4894	2.77315	1.47153	0.460805	8.65752e-05	0.00118895	44.2357	35.7522	97.3828	160.587
3110009F21Rik	19.6848	0.0656733	-3.92855	1.21773	8.66533e-05	0.00118895	57.6093	17.8761	2.34657	0.90727
Sh3bp2	222.966	0.518476	-0.94765	0.282928	8.71264e-05	0.00119433	330.225	273.504	158.394	129.74
Gm13431	40.9688	4.02901	2.01043	0.644226	8.75939e-05	0.00119963	16.4598	10.7257	58.6644	78.0253
Trim36	17.9814	0.0707264	-3.82161	1.17633	8.80659e-05	0.00120498	32.9196	35.7522	2.34657	0.90727
Neil3	330.284	1.72724	0.78847	0.229068	8.83315e-05	0.0012075	239.696	226.133	427.077	428.232
Zfp622	1152.36	0.643324	-0.636383	0.179529	8.85353e-05	0.00120917	1274.61	1576.67	803.702	954.448
Ivns1abp	3274.06	0.710052	-0.494003	0.135232	9.09126e-05	0.00124049	3975.04	3762.03	2760.74	2598.42
Kif20b	1382.51	1.49855	0.58357	0.16294	9.14911e-05	0.00124723	998.904	1167.31	1775.18	1588.63
Cpox	1384.09	1.48752	0.572907	0.160048	9.45831e-05	0.00128819	1104.86	1075.25	1813.9	1542.36
Set	8619.62	0.730314	-0.453412	0.123483	9.52675e-05	0.00129632	9972.58	10130.4	7238.01	7137.5
Magt1	1450.77	1.48151	0.567071	0.158252	9.53961e-05	0.00129688	1169.67	1123.51	1619.14	1890.75
Ank1	87.3951	2.59407	1.37522	0.432836	9.6878e-05	0.00131582	45.2644	42.0089	152.527	109.78
Rmnd5a	1623.76	1.50408	0.588877	0.165476	9.78816e-05	0.00132823	1162.47	1375.57	1810.38	2146.6
Vps72	2470.63	0.692937	-0.529204	0.147084	9.81264e-05	0.00133033	3172.63	2736.83	1925.36	2047.71
Stxbp2	2041.54	1.43597	0.522028	0.144827	9.8367e-05	0.00133237	1659.35	1636.56	2309.03	2561.22
Mdh1	6393.08	1.3702	0.454382	0.125176	9.91521e-05	0.00134177	5327.83	5310.99	7490.27	7443.25
Dpysl2	587.28	0.564014	-0.826198	0.244297	9.98959e-05	0.0013506	682.053	858.053	310.921	498.091
Zfp72	110.479	2.29688	1.19967	0.373359	0.000101406	0.00136977	65.8392	57.2036	161.914	156.958
Tmem135	1295.27	1.58547	0.664913	0.190581	0.000102005	0.00137661	876.484	1071.67	1373.92	1859
Hpgds	33.1952	4.64204	2.21476	0.720913	0.000102196	0.00137712	7.20116	11.6195	50.4513	63.5089
C4b	24.6475	0.146933	-2.76677	0.905274	0.000102229	0.00137712	31.8909	57.2036	5.86644	3.62908
Prkd3	797.012	0.654425	-0.6117	0.17364	0.000102993	0.00138615	938.208	1018.94	603.07	627.831
Dcaf8	3135.41	0.706747	-0.500735	0.138754	0.000104313	0.00140263	3917.43	3511.76	2504.97	2607.5
Pink1	901.549	1.57729	0.657452	0.189553	0.000106143	0.00142594	655.306	704.319	969.135	1277.44
Med12	935.324	1.52683	0.610539	0.17344	0.000106428	0.00142848	702.628	743.646	1054.79	1240.24
Chtop	3812.47	0.719403	-0.475128	0.131071	0.000107801	0.00144558	4516.16	4439.53	3211.29	3082.9
Mtm1	178.41	1.98463	0.988873	0.301672	0.00010792	0.00144587	113.161	111.726	222.925	265.83
Bicc1	5363.47	0.668929	-0.580076	0.164411	0.00010995	0.00147174	6131.27	6911.8	3563.27	4847.55
Atp6v1c1	1938.28	1.44258	0.528654	0.148203	0.000112359	0.00150263	1493.73	1624.04	2433.4	2201.95
Scd2	44515.9	1.51425	0.598602	0.170269	0.00011325	0.00151317	30738.7	38494.4	45710.1	63120.6
Arhgap19	798.357	1.60273	0.680529	0.197494	0.000114293	0.00152573	529.8	660.522	891.698	1111.41
Alkbh5	4587.62	1.41337	0.499143	0.138959	0.000114411	0.00152592	3448.33	4039.11	5467.52	5395.54
Tiam1	18.5795	0.0247211	-5.33811	1.50494	0.000115311	0.00153654	34.9771	38.4336	0	0.90727
Hbegf	961.194	0.6515	-0.618162	0.17741	0.000115807	0.00154176	1094.58	1270.1	797.835	682.267
Marcksl1	461.034	0.617792	-0.694806	0.202999	0.000117408	0.00156167	590.495	572.036	333.214	348.392
Nts	10.7637	0.0141408	-6.14399	2.7894	0.000117536	0.00156197	21.6035	21.4513	0	0
Neurl3	4491.89	0.653074	-0.614681	0.17658	0.000118	0.00156559	5941.99	5105.42	2842.87	4077.27
Gm42793	42.0827	0.267842	-1.90054	0.626162	0.00011802	0.00156559	77.1553	61.6726	14.0794	15.4236
Zfyve26	687.268	1.56866	0.649529	0.187793	0.000118445	0.00156982	519.512	521.982	776.716	930.859
Myo1c	4768.14	0.710918	-0.492245	0.137365	0.000119841	0.00158689	5290.8	5974.2	4067.79	3739.77
Fdft1	3515.49	0.703746	-0.506874	0.142012	0.000120886	0.0015993	4318.64	4029.28	2649.28	3064.76
Psmd10	1099.98	0.668072	-0.581924	0.165919	0.000121127	0.00159995	1439.2	1237.03	851.806	871.887
Gkn2	16.4928	20.7076	4.37209	1.32281	0.000121151	0.00159995	0	1.78761	26.9856	37.1981
Slc9a3r2	2096.99	1.46263	0.548569	0.155561	0.000122572	0.00161727	1649.07	1691.97	2267.96	2778.97
Vps13b	1369.74	1.47462	0.560347	0.159153	0.00012316	0.00162358	1012.28	1157.48	1586.28	1722.91
Rps19bp1	644.047	0.638481	-0.647284	0.18796	0.000123679	0.00162897	753.036	846.434	510.38	466.337
Spsb1	139.103	0.473849	-1.0775	0.337575	0.000123815	0.00162931	210.891	179.655	83.3034	82.5616
Trip10	1571.09	0.694308	-0.526351	0.148567	0.000124245	0.00163351	1819.84	1934.2	1288.27	1242.05
Mfap5	18.4158	9.64908	3.27039	1.0689	0.000125335	0.00164639	2.05747	2.68142	39.8918	29.0327
Exosc4	997.042	0.664989	-0.588597	0.168841	0.000125997	0.00165361	1304.44	1127.09	787.276	769.365
Btbd1	1740.83	0.701306	-0.511883	0.144274	0.000127738	0.00167497	2041.01	2099.55	1405.6	1417.16
Mat2a	12101.2	0.680728	-0.554849	0.158179	0.00012845	0.00168283	15952.6	13239	10823.6	8389.53
Camk1	1565.81	1.44501	0.53108	0.150304	0.0001289	0.00168722	1235.51	1280.82	1788.09	1958.8
Man2b2	548.192	1.69322	0.759766	0.226612	0.000130288	0.00170238	410.466	373.611	574.911	833.781
Atxn1	158.941	0.49689	-1.009	0.314764	0.000130229	0.00170238	228.38	210.044	102.076	95.2634
Ppp1r14b	4471.59	0.712595	-0.488846	0.137321	0.00013052	0.00170391	5491.4	5064.3	3881.23	3449.44
Zfp871	2634.3	1.40967	0.495359	0.139082	0.000130709	0.0017043	2160.35	2146.92	2971.94	3258.01
Rab1b	4500.92	1.38462	0.469486	0.132205	0.000130781	0.0017043	3773.41	3662.82	5052.17	5515.3
Ripk3	10.6288	0.0145115	-6.10666	2.79673	0.000131021	0.00170593	17.4885	25.0266	0	0
Dvl2	1180.82	1.4856	0.571048	0.163411	0.000131326	0.00170839	912.49	948.328	1324.64	1537.82
Dipk1a	384.399	0.59437	-0.750567	0.224116	0.000131453	0.00170854	493.794	491.593	302.708	249.499
Zfx	746.357	1.53761	0.620685	0.179979	0.000131615	0.00170915	558.604	588.124	858.846	979.852
Krt23	584.393	1.84481	0.883474	0.270327	0.000133127	0.00172726	279.817	498.743	905.778	653.235
2610307P16Rik	43.4531	0.273472	-1.87054	0.622403	0.000133278	0.0017277	75.0978	67.9292	11.7329	19.0527
Pcbd1	1523.88	1.53906	0.622053	0.180456	0.000133796	0.0017329	1199.51	1141.39	1578.07	2176.54
1110008P14Rik	547.282	0.616228	-0.698463	0.206588	0.00013425	0.00173727	772.582	609.575	405.957	401.013
Zfp182	167.168	2.0074	1.00533	0.313875	0.000134379	0.00173741	116.247	92.062	221.751	238.612
Soat2	417.856	1.69597	0.762112	0.228432	0.000136724	0.00176619	265.414	329.814	588.99	487.204
Siah1a	362.807	0.59711	-0.743932	0.222534	0.000137384	0.00177212	481.449	447.797	253.43	268.552
2210016F16Rik	22.4369	0.142582	-2.81014	0.9419	0.000137423	0.00177212	50.4081	31.2832	3.51986	4.53635
Ttc26	428.168	0.607774	-0.718393	0.213846	0.000138507	0.00178455	570.949	517.513	292.149	332.061
Slc22a4	208.079	1.89065	0.918885	0.283972	0.0001387	0.00178547	136.822	134.965	307.401	253.128
Gosr2	2558.52	1.40274	0.488249	0.137383	0.000139657	0.00179623	2120.23	2077.2	3099.82	2936.83
Foxg1	422.943	0.59296	-0.753993	0.226306	0.000140061	0.00179987	481.449	605.106	280.416	324.803
Gpsm1	329.589	0.553431	-0.853524	0.261858	0.000141381	0.00181463	503.053	368.248	251.083	195.97
Me1	8586.38	1.39048	0.475584	0.134038	0.000141455	0.00181463	6824.64	7336.36	9409.76	10774.7
Kctd2	467.252	0.605469	-0.723875	0.21608	0.000141638	0.00181539	603.869	586.336	296.842	381.961
Prmt2	1198.73	1.46216	0.548103	0.156955	0.000141814	0.00181607	992.732	917.044	1460.74	1424.41
Kyat3	255.492	0.559133	-0.838737	0.256596	0.000143291	0.00183182	354.914	318.195	170.127	178.732
Gngt2	201.519	2.01691	1.01214	0.317892	0.000143192	0.00183182	120.362	129.602	215.885	340.226
Nsdhl	1621.01	1.55501	0.636927	0.186875	0.000147313	0.00188162	1165.56	1304.06	1655.51	2358.9
Zfp462	599.034	0.625483	-0.676958	0.20098	0.00014849	0.00189174	674.852	828.558	420.037	472.688
Pank3	3142.2	1.44113	0.527202	0.150635	0.000148247	0.00189174	2762.16	2296.19	3545.67	3964.77
Chrd	106.117	2.3231	1.21605	0.393261	0.000148466	0.00189174	63.7817	52.7345	133.755	174.196
Nanos1	264.452	1.86668	0.900474	0.279366	0.000149763	0.00190632	155.339	193.062	411.824	297.585
Pf4	26.3586	0.175988	-2.50645	0.849816	0.00015101	0.00192054	40.1208	53.6283	3.51986	8.16543
Hmgn5	371.308	1.70349	0.768495	0.232773	0.000151188	0.00192116	262.328	264.566	537.366	420.973
Zfp78	16.5952	14.1395	3.82166	1.23297	0.000152616	0.00193615	0	2.68142	32.852	30.8472
Sgsm3	1830.53	0.701131	-0.512245	0.14637	0.00015263	0.00193615	2089.37	2266.69	1445.49	1520.59
9130008F23Rik	199.099	0.530513	-0.91454	0.285287	0.000153438	0.00194473	278.788	257.416	123.195	136.998
Nfatc2	17.6182	0.0265513	-5.23507	1.51993	0.000154314	0.00195416	32.9196	36.646	0	0.90727
Tcp11x2	77.0256	2.55817	1.35511	0.445623	0.000154618	0.00195633	37.0345	40.2212	113.809	117.038
Sar1b	2154.84	1.54785	0.630265	0.185426	0.000154915	0.00195683	1969	1324.62	2649.28	2676.45
Ms4a4b	17.6213	39.2294	5.29387	1.52659	0.000154922	0.00195683	1.02874	0	42.2383	27.2181
Mrps33	1661.85	1.48255	0.568084	0.164788	0.000155909	0.00196762	1442.29	1178.04	2143.6	1883.49
Stab2	88.7069	3.02002	1.59456	0.533762	0.000156251	0.00197026	20.5747	55.4159	97.3828	181.454
Tmf1	1090.14	1.49769	0.582739	0.169475	0.000157207	0.00198062	778.754	927.77	1277.71	1376.33
Hmces	889.926	1.48957	0.574895	0.167255	0.000159581	0.00200881	675.88	722.195	1094.68	1066.95
Klhl2	1493.09	0.688956	-0.537516	0.154771	0.000160298	0.00201613	1899.05	1682.14	1230.78	1160.4
Fkbp1b	33.6388	0.220938	-2.17829	0.753868	0.000162093	0.00203698	52.4656	62.5664	14.0794	5.44362
Lipa	1980.57	1.49757	0.58262	0.170206	0.000164277	0.00206266	1485.5	1615.11	2070.85	2750.84
Zfp600	26.3731	5.55776	2.4745	0.848835	0.000164519	0.00206395	3.08621	8.93806	48.1048	45.3635
Gps2	681.047	1.52348	0.607374	0.178701	0.000165985	0.00208057	537.001	515.726	829.514	841.947
Bach1	559.879	1.5669	0.647911	0.1925	0.000166238	0.00208199	410.466	437.071	665.254	726.724
Prex2	21.7799	0.131708	-2.92459	1.0035	0.000167563	0.00209569	23.661	56.3097	3.51986	3.62908
Ect2	3564.32	1.39279	0.477975	0.136159	0.000167616	0.00209569	2836.23	3035.36	4372.84	4012.86
Akap17b	124.353	2.1237	1.08658	0.350823	0.000170223	0.00212649	70.9829	75.9735	177.166	173.289
Sqor	1505.52	1.48487	0.570333	0.166622	0.000170884	0.00213295	1045.2	1324.62	1854.97	1797.3
Socs3	771.101	0.65682	-0.606431	0.178997	0.000171237	0.00213555	882.657	1010	578.431	613.315
Vac14	1317.58	1.51007	0.594618	0.174824	0.000171716	0.00213972	904.26	1144.96	1501.81	1719.28
Sprr2h	38.5519	0.246317	-2.02141	0.702957	0.000173061	0.00215467	73.0404	56.3097	17.5993	7.25816
Akr1b3	4549.11	0.676959	-0.562859	0.164421	0.000173384	0.00215687	5113.85	5891.97	4115.89	3074.74
Prkaa1	1896.27	1.41114	0.496865	0.14285	0.000173546	0.00215708	1508.13	1586.5	2230.42	2260.01
Psmb10	648.362	0.605022	-0.724941	0.220406	0.00017378	0.00215817	951.582	701.637	409.477	530.753
Errfi1	2419.22	0.680577	-0.555169	0.16204	0.00017403	0.00215946	2548.18	3291.89	1852.62	1984.2
Kif18b	993.131	1.55999	0.641537	0.19112	0.000174234	0.00216018	658.392	848.221	1356.32	1109.59
Cplane1	863.283	1.52943	0.61299	0.181317	0.000175006	0.00216611	595.639	733.814	1099.37	1024.31
Josd1	1903.83	0.70245	-0.509533	0.147111	0.000174992	0.00216611	2244.7	2281.89	1634.39	1454.35
Vtcn1	10.0596	0.0159563	-5.96973	2.80586	0.000175568	0.00217098	20.5747	19.6637	0	0
Wdr62	322.282	1.72305	0.784964	0.241582	0.000175692	0.00217098	203.69	249.372	394.224	441.841
Cd36	51.2354	3.2487	1.69986	0.581617	0.000176533	0.00217954	26.7472	14.3009	78.6102	85.2834
Asph	2256.42	0.707083	-0.500049	0.144415	0.000178493	0.00220191	2718.95	2630.47	1948.83	1727.44
Myc	2172.66	0.66247	-0.594073	0.175695	0.000180688	0.00222711	2281.74	3029.11	1845.58	1534.19
Cela1	738.138	0.561344	-0.833042	0.260199	0.000180837	0.00222711	1247.86	696.275	434.116	574.302
Gjb3	574.416	0.641223	-0.641101	0.193962	0.000181635	0.00223322	665.593	763.31	422.383	446.377
Ing3	765.588	1.50258	0.587445	0.173255	0.000181609	0.00223322	592.553	602.425	909.298	958.078
Zfp677	102.345	0.395414	-1.33857	0.447572	0.000182594	0.00224315	159.454	147.478	31.6788	70.7671
Zbtb20	922.658	1.49651	0.581599	0.171288	0.000182796	0.00224376	711.886	732.921	1041.88	1203.95
Brwd3	398.137	1.66969	0.739577	0.226597	0.000184089	0.00225776	311.707	261.885	552.618	466.337
Rhobtb1	310.728	0.564907	-0.823915	0.257798	0.000188939	0.00231533	467.047	349.478	195.939	230.447
Ncor1	4006.63	1.39322	0.478425	0.137183	0.000190579	0.00233349	3144.85	3458.13	4492.52	4931.01
Gimd1	1598.5	1.54656	0.629066	0.188479	0.000194358	0.00237779	1132.64	1309.43	1632.04	2319.89
Kif21a	404.309	1.69954	0.76514	0.236758	0.000194833	0.00238163	237.638	336.071	520.939	522.588
Ahrr	87.1066	2.41677	1.27308	0.426858	0.000196386	0.00239864	51.4369	40.2212	136.101	120.667
Megf9	937.918	1.58559	0.665023	0.201285	0.000197156	0.00240011	642.961	763.31	980.868	1364.53
Smco4	65.7587	2.80582	1.48842	0.508974	0.000197121	0.00240011	38.0633	22.3451	97.3828	105.243
Map2k4	1764.66	1.43573	0.521788	0.152305	0.000197109	0.00240011	1315.76	1529.3	2137.73	2075.83
Hspa13	1173	1.45959	0.545562	0.160269	0.000196865	0.00240011	951.582	917.044	1492.42	1330.97
Cyp1b1	78.145	0.394626	-1.34144	0.453184	0.00019935	0.00242482	117.276	117.089	32.852	45.3635
Mgat2	2643.7	0.689215	-0.536973	0.15773	0.000200238	0.00243362	3553.26	2793.14	2059.12	2169.28
D630045J12Rik	518.703	1.61051	0.687516	0.209627	0.000200936	0.0024401	344.627	422.77	700.452	606.964
Ubr3	1390.38	1.43856	0.524621	0.153098	0.00020301	0.00246327	1067.83	1171.78	1682.49	1639.44
Pja1	1764.76	1.42648	0.512462	0.149625	0.000203265	0.00246434	1518.42	1339.81	2129.52	2071.3
Fam50a	667.261	1.61916	0.695243	0.212738	0.000204981	0.00248107	412.524	571.142	770.85	914.529
Map2k3	2011.24	1.43453	0.520579	0.152419	0.000204827	0.00248107	1481.38	1761.69	2455.69	2346.2
Nup155	2816.08	1.38147	0.466207	0.134648	0.000206271	0.00249465	2300.26	2362.33	3339.18	3262.54
Cyp4f13	295.139	1.70359	0.768577	0.239369	0.000206919	0.00250044	211.92	206.469	368.412	393.755
Klhdc2	2307.6	0.713922	-0.486162	0.141588	0.000210725	0.00254435	2819.77	2626.89	1954.7	1829.06
Adh7	2425.36	1.45303	0.539068	0.159189	0.000214687	0.00259008	2159.32	1717.89	2763.09	3061.13
Nt5c3	1866.82	1.41891	0.504783	0.147768	0.000216436	0.00260905	1472.12	1562.37	2100.18	2332.59
Angptl4	802.928	0.631446	-0.66327	0.20293	0.000217234	0.00261654	1119.27	888.443	680.507	523.495
Cbln3	237.881	1.92196	0.942578	0.305044	0.000217596	0.00261876	142.994	162.673	247.564	398.292
Copz2	57.3721	2.98859	1.57947	0.548043	0.000217895	0.00261976	21.6035	27.708	70.3972	109.78
Ubald1	814.87	0.651439	-0.618299	0.186832	0.000218033	0.00261976	988.617	1021.62	547.925	701.32
Tnfrsf1a	2288.14	1.3925	0.477678	0.13888	0.00021838	0.0026218	1882.59	1885.93	2622.3	2761.73
Tyk2	1149.69	1.45333	0.539367	0.159556	0.000219736	0.00263594	959.812	877.717	1342.24	1418.97
Ube2a	847.682	1.48799	0.573367	0.171236	0.000220342	0.0026409	653.248	678.398	978.521	1080.56
Wls	5030.51	0.72554	-0.462873	0.134352	0.000220506	0.0026409	5767.1	6015.31	3917.61	4422.04
Aplp2	6024.64	1.41045	0.496154	0.145206	0.000222178	0.00265752	4595.37	5237.7	6504.7	7760.79
Naprt	139.959	0.430962	-1.21437	0.410253	0.000222253	0.00265752	246.897	161.779	50.4513	100.707
Lancl1	1280.94	1.44953	0.535584	0.158522	0.00022325	0.00266728	957.754	1092.23	1512.37	1561.41
Gm13147	141.254	0.472578	-1.08138	0.360882	0.000225948	0.00269734	219.121	178.761	100.903	66.2307
Dmxl2	27.3584	0.203972	-2.29356	0.817978	0.000226825	0.00270562	39.092	56.3097	5.86644	8.16543
Acsm3	142.274	2.10359	1.07285	0.356466	0.000230387	0.00274368	75.0978	93.8496	164.26	235.89
Crb3	858.26	1.48872	0.574073	0.172158	0.000230281	0.00274368	714.972	632.814	1021.93	1063.32
Skap2	1407.19	1.43631	0.522362	0.155093	0.00023263	0.00276806	1204.65	1060.95	1688.36	1674.82
mt-Cytb	83903.3	1.44034	0.526414	0.154253	0.000232809	0.00276806	57624.7	77601.1	95807.1	104580
Prorsd1	184.875	1.88098	0.911488	0.295912	0.000235019	0.0027921	130.65	110.832	255.777	242.241
Dlx4os	121.482	2.10949	1.07689	0.359107	0.000236288	0.00280493	66.8679	76.8673	160.74	181.454
Lcp1	133.004	2.18243	1.12594	0.378154	0.000238172	0.00282276	59.6668	92.9558	160.74	218.652
Ddx3y	511.848	0.575752	-0.796481	0.253579	0.000238073	0.00282276	833.277	501.425	374.279	338.412
Top2a	13564.5	1.43375	0.519795	0.153987	0.000238428	0.00282353	9519.94	12357.8	17310.7	15069.8
Spink4	230.65	1.77354	0.826634	0.264415	0.000240537	0.00284622	153.282	162.673	302.708	303.936
Rnh1	8240.83	1.35333	0.436512	0.127723	0.000240901	0.00284826	7105.49	6707.12	9207.96	9942.78
Gsta2	143.616	2.0834	1.05894	0.353611	0.000243005	0.00287084	99.7875	72.3982	173.646	228.632
Eif2ak3	495.588	1.60727	0.684609	0.212367	0.000246009	0.00290169	329.196	404.894	579.604	668.658
Cenpw	609.271	1.60132	0.67926	0.210663	0.000245826	0.00290169	516.426	388.805	825.994	705.856
Plxna1	1752.47	1.40335	0.488872	0.144092	0.000247001	0.00291107	1437.15	1431.88	2113.09	2027.75
Zfp28	15.2561	12.4387	3.63677	1.24756	0.000248139	0.00292215	1.02874	1.78761	24.639	33.569
Cltc	10160.6	1.43237	0.518405	0.154218	0.000248815	0.00292779	7055.08	9338.48	11634.3	12614.7
Fbxw8	2342.73	1.40104	0.486499	0.143428	0.000249267	0.00293078	1966.95	1872.52	2920.31	2611.12
Ccdc34	1172.83	1.45704	0.54304	0.162723	0.000252152	0.00296233	997.875	872.354	1362.19	1458.89
Tcf19	1417.83	1.43563	0.521681	0.155474	0.000252361	0.00296244	1074	1209.32	1745.85	1642.16
Gstm6	45.2181	3.53881	1.82326	0.652308	0.000253407	0.00297236	9.25864	23.2389	62.1842	86.1907
Plxna3	377.571	1.63698	0.711037	0.222804	0.000255631	0.0029937	257.184	294.062	456.409	502.628
H60b	238.606	1.77746	0.829816	0.267163	0.000255595	0.0029937	148.138	177.867	302.708	325.71
Plce1	526.86	1.74723	0.805071	0.257806	0.000256169	0.00299763	309.65	420.982	530.326	846.483
Baiap2l1	1540.79	0.65833	-0.603118	0.184218	0.000257093	0.00300605	1801.32	1982.46	986.734	1392.66
Rbm3	16000.2	1.43056	0.516578	0.153915	0.000257608	0.00300969	14518.6	11323.6	20635.8	17523
Ptpn7	35.0541	4.21158	2.07436	0.753211	0.000258686	0.00301991	12.3448	8.93806	36.3719	82.5616
Ppp3r1	2627	1.39666	0.481986	0.142402	0.000260261	0.0030359	2298.2	2017.32	3058.76	3133.71
Slc9a6	455.577	1.62933	0.704278	0.22087	0.000260665	0.00303821	378.575	289.593	552.618	601.52
Radx	9.44405	0.708618	-0.49692	1.61635	0.000260987	0.00303957	15.4311	22.3451	0	0
Pfn2	113.154	0.467816	-1.09599	0.371868	0.000262159	0.00304946	167.684	152.841	70.3972	61.6944
Acap2	1968.8	1.39789	0.483251	0.142903	0.00026226	0.00304946	1601.74	1630.3	2239.81	2403.36
G730013B05Rik	17.1487	8.59928	3.10422	1.10906	0.000262454	0.00304946	2.05747	2.68142	37.5452	26.3108
Nabp1	1217.91	1.54468	0.627311	0.193034	0.000262973	0.00305106	1091.49	768.673	1405.6	1605.87
Furin	3923.17	0.72111	-0.47171	0.139274	0.000263005	0.00305106	4280.58	4938.28	3163.18	3310.63
Rrs1	1232.84	0.686648	-0.542358	0.163668	0.000263521	0.00305227	1463.89	1502.49	1067.69	897.29
Lage3	824.032	1.48508	0.570539	0.172911	0.000263468	0.00305227	678.967	616.726	967.962	1032.47
Foxm1	2729.6	1.4749	0.56062	0.169464	0.000264411	0.00306018	1807.49	2503.55	3303.98	3303.37
Mpzl1	1231.86	0.677982	-0.560681	0.170145	0.000267959	0.00309666	1428.92	1552.54	1075.9	870.072
Crot	2280.1	1.41342	0.499194	0.148529	0.000267982	0.00309666	1879.5	1834.98	2482.68	2923.23
Tceal1	9.3218	0.714026	-0.485951	1.44967	0.000272479	0.00314617	18.5173	18.7699	0	0
Sfmbt2	16.2295	0.0790228	-3.66159	1.26125	0.000273533	0.00315341	38.0633	24.1327	0	2.72181
Epg5	751.811	1.51299	0.597404	0.182578	0.000273341	0.00315341	541.116	624.77	870.579	970.779
Zbtb33	839.13	1.52026	0.604314	0.185839	0.000273903	0.00315521	710.858	585.443	951.536	1108.68
Rock2	4394.05	1.37531	0.459757	0.135765	0.000275544	0.00317165	3408.21	3883.59	5120.23	5164.18
Gpx4	16131.3	1.40414	0.489687	0.144982	0.000276259	0.00317741	14820	11595.3	19251.3	18858.5
Tpm1	7538.21	0.741261	-0.431947	0.127608	0.000278329	0.00319873	8821.42	8671.7	6609.13	6050.59
Clns1a	1364.39	0.701489	-0.511507	0.153379	0.000278788	0.00320152	1670.67	1578.46	1145.13	1063.32
Dhh	401.013	0.602102	-0.73192	0.233078	0.00027927	0.00320456	529.8	495.168	333.214	245.87
Slc26a2	4365.22	1.48903	0.574371	0.175227	0.000279792	0.00320807	3251.84	3594.89	4337.64	6276.5
Axl	12501.9	1.37081	0.455034	0.134651	0.000281908	0.00322982	9514.79	11270.9	14859.7	14362.1
Ahcyl2	2742.6	1.51093	0.595433	0.182609	0.000282176	0.00323039	1812.64	2442.77	2914.45	3800.56
Pls1	1864.36	1.45142	0.537467	0.162934	0.000284345	0.00325271	1429.94	1547.18	1981.68	2498.62
Ctse	235.064	1.81364	0.858891	0.281541	0.000287716	0.00328872	168.713	147.478	267.509	356.557
Usf1	1257.39	0.69586	-0.52313	0.157995	0.000289806	0.00331005	1572.94	1433.66	1051.27	971.687
Gm7240	44.1258	3.18478	1.67119	0.604013	0.000290147	0.00331139	16.4598	18.7699	66.8774	74.3962
Zfp146	1381.18	0.693985	-0.527023	0.159408	0.000290635	0.00331441	1656.27	1649.96	1201.45	1017.05
Ephb6	194.659	0.547391	-0.869358	0.286583	0.000290865	0.00331447	270.558	248.478	132.581	127.018
Aldh3a2	2994.15	1.43386	0.519901	0.156825	0.000291882	0.0033235	2430.91	2395.4	3125.64	4024.65
Ppfibp2	44.8662	3.28771	1.71708	0.624367	0.000293779	0.00334253	20.5747	14.3009	57.4911	87.098
Nutm1	29.3028	0.232773	-2.103	0.773785	0.000295108	0.00335506	48.3507	51.8407	7.03972	9.97997
Prelp	9.2206	0.740183	-0.434047	1.00961	0.000297051	0.00337282	15.4311	21.4513	0	0
Pdk2	314.748	1.80145	0.849157	0.278287	0.000297125	0.00337282	190.316	235.071	327.347	506.257
Cnpy2	2876.29	0.701841	-0.510785	0.153879	0.00029786	0.00337856	3774.44	3075.58	2204.61	2450.54
Pdlim7	887.737	0.671863	-0.573761	0.176116	0.000298353	0.00338157	1024.62	1135.13	641.788	749.405
Aspa	116.271	0.463505	-1.10934	0.383207	0.000300373	0.00340185	192.374	138.54	71.5705	62.6017
Prmt1	5653.02	0.725719	-0.462516	0.13753	0.000301455	0.00341149	6996.44	6245.02	4959.48	4411.15
Sdc4	5471.93	0.737331	-0.439615	0.130143	0.000303363	0.00343046	6141.56	6580.2	4440.89	4725.06
Rnf113a2	100.554	2.2302	1.15717	0.402268	0.000306998	0.00346891	63.7817	49.1593	131.408	157.865
Cip2a	1653.02	1.42249	0.50842	0.153355	0.000307818	0.00347552	1364.11	1314.79	2109.57	1823.61
Nfkb1	3195.72	0.726218	-0.461526	0.137814	0.000309089	0.00348722	3691.11	3794.2	2797.12	2500.44
C1galt1	2094.72	1.44798	0.53404	0.162491	0.000309979	0.00349459	1848.64	1504.27	2319.59	2706.39
Pear1	1810.69	0.718457	-0.477027	0.143104	0.000313153	0.00352768	2158.29	2105.81	1468.96	1509.7
Krt4	15.517	32.8064	5.0359	1.57663	0.000314036	0.00353235	1.02874	0	21.1192	39.9199
mt-Nd4	15991	1.48266	0.568192	0.173957	0.000314045	0.00353235	10152.6	15022.2	18247	20542.4
Wdyhv1	500.605	0.641159	-0.641245	0.201682	0.000314955	0.00353989	635.76	608.682	405.957	352.021
Rras	1333.16	0.684043	-0.547841	0.167865	0.000317304	0.00356359	1674.78	1541.81	945.669	1170.38
Fam131c	302.069	1.72461	0.786268	0.256222	0.000317973	0.00356569	176.943	244.903	395.398	391.034
Por	3578.53	1.38964	0.474716	0.142382	0.000317833	0.00356569	2859.89	3035.36	3878.89	4539.98
Hnrnpd	2184.86	0.68791	-0.539707	0.165297	0.000318579	0.00356707	2369.18	2887.89	1569.86	1912.53
Zdhhc17	920.959	0.673798	-0.569611	0.175759	0.000318357	0.00356707	1221.11	1016.26	741.517	704.949
Ctso	145.733	0.494437	-1.01614	0.348336	0.000322081	0.00360356	236.61	168.929	82.1301	95.2634
Zfp326	705.505	0.662098	-0.594884	0.186566	0.000324575	0.00362872	945.41	785.655	542.059	548.899
Aldh6a1	497.162	1.63216	0.706783	0.226414	0.000325532	0.00363667	371.374	355.735	522.113	739.425
Ddx41	1457.95	1.44981	0.535863	0.163194	0.000327118	0.00364909	1285.92	1047.54	1708.31	1790.04
Pkmyt1	831.828	1.48762	0.573004	0.17709	0.000327137	0.00364909	611.07	693.593	953.882	1068.76
Rab11fip5	186.642	0.454931	-1.13628	0.399367	0.000327537	0.00365079	242.782	291.381	152.527	59.8798
2022-03-08	3446.44	1.36352	0.447335	0.133508	0.000330389	0.00367981	2980.25	2772.58	3977.44	4055.5
Hoxa3	9.40194	0.775099	-0.367548	0.738683	0.000331986	0.00369204	27.7759	9.83186	0	0
Mocos	471.697	1.59029	0.669287	0.212833	0.000331884	0.00369204	387.834	315.513	621.842	561.6
Zfp13	17.6537	0.096322	-3.37599	1.22433	0.00033276	0.00369786	47.3219	19.6637	0	3.62908
Nup205	5293.6	1.37317	0.457509	0.137083	0.000334733	0.003717	4134.5	4656.73	6505.88	5877.3
Hcfc1	4002.59	1.37315	0.457492	0.137093	0.000335464	0.00372232	3134.56	3512.66	4850.37	4512.76
Odaph	52.1527	0.30313	-1.72199	0.645202	0.000337473	0.0037418	104.931	63.4602	29.3322	10.8872
Serpinb6a	6659.69	1.40132	0.486785	0.146993	0.000341857	0.00378757	4888.56	6020.67	8308.05	7421.47
Zfp110	983.27	0.683117	-0.549795	0.169721	0.000342878	0.00379603	1167.62	1206.64	716.878	841.947
Krtcap3	55.5642	0.339041	-1.56047	0.577401	0.000343669	0.00380195	103.902	70.6106	30.5055	17.2381
Bmper	202.298	0.540085	-0.888743	0.299101	0.000344133	0.00380424	281.874	261.885	110.289	155.143
Gripap1	618.786	1.53052	0.614019	0.193054	0.000346719	0.00382996	428.983	520.195	772.023	753.942
Mob1a	5366.16	1.33928	0.421453	0.126609	0.000349255	0.0038551	4477.06	4573.6	6137.47	6276.5
Dhfr	2363.89	1.45996	0.545933	0.168661	0.000353966	0.00390418	1880.53	1876.1	3282.86	2416.06
Hnrnpa1	12706.1	0.749371	-0.416247	0.124021	0.000354546	0.00390767	14709.9	14600.3	11168.5	10345.6
Ctsz	2407.15	1.37147	0.455723	0.137009	0.000357742	0.00393996	2005.01	1997.66	2768.96	2856.99
Med22	2512.05	0.693864	-0.527274	0.162422	0.000361287	0.00397308	3228.18	2788.67	2250.36	1780.97
Ilf2	2806.82	0.72003	-0.473871	0.143934	0.000361144	0.00397308	3275.5	3328.53	2492.06	2131.18
Ermp1	1100.94	1.45419	0.540211	0.166949	0.000362868	0.00398751	821.961	933.133	1246.03	1402.64
Rnf141	1652.96	1.39978	0.485196	0.147833	0.000365753	0.00401623	1353.82	1354.12	1864.35	2039.54
Padi2	1341.92	1.49397	0.57915	0.180263	0.000368394	0.00404222	1017.42	1083.29	1388	1878.96
Sgk3	950.122	1.47446	0.560183	0.174473	0.000370456	0.00406183	818.875	681.08	1111.1	1189.43
Luc7l2	4201.4	1.38634	0.471286	0.143133	0.000373645	0.00409377	3750.78	3179.27	5157.77	4717.81
Ccnb2	612.697	1.55828	0.639957	0.204153	0.000376081	0.00411741	418.696	508.575	685.2	838.318
Cryz	3912.43	0.729509	-0.455003	0.137853	0.000379948	0.00415667	4779.51	4368.92	3076.36	3424.95
Sgk1	377.321	0.596057	-0.746477	0.245986	0.000381796	0.0041738	401.208	569.354	279.242	259.479
Atad5	921.645	1.61683	0.693164	0.224943	0.000382672	0.00418028	581.237	772.248	1406.77	926.323
Phex	21.4443	0.178363	-2.48711	0.953016	0.000383711	0.00418854	45.2644	31.2832	4.69315	4.53635
Tex9	52.3361	0.351788	-1.50722	0.561529	0.000386213	0.00421274	92.5864	70.6106	23.4657	22.6818
Gm20186	131.259	0.491664	-1.02426	0.359032	0.000389014	0.00423704	205.747	160.885	70.3972	88.0052
Gmfg	196.495	1.85504	0.891454	0.304055	0.000388838	0.00423704	144.023	114.407	229.964	297.585
Rlim	2248.15	1.40521	0.490783	0.15041	0.00039157	0.00425861	1778.69	1894.87	2435.74	2883.31
Vopp1	1675.69	1.41177	0.497505	0.153253	0.000391487	0.00425861	1405.26	1321.04	2128.34	1848.11
AU018091	8.41604	48.5215	5.60055	2.845	0.000394317	0.00428534	0	0	16.426	17.2381
Dhcr24	4641.63	0.722138	-0.469653	0.143625	0.000399514	0.00433862	4987.32	5921.46	3643.06	4014.67
Cdca3	1891.68	1.41285	0.498613	0.153686	0.00040381	0.00438207	1412.46	1665.16	2156.5	2332.59
Apip	976.467	0.683808	-0.548336	0.171818	0.000405141	0.00439329	1254.03	1103.85	725.091	822.894
Tuba1b	20889	1.45726	0.543256	0.169447	0.000406587	0.00440573	17951.5	15299.3	29551.6	20753.8
Rusc2	736.309	1.56394	0.645182	0.207885	0.000409068	0.00442938	453.673	656.053	912.817	922.694
Actb	40437.9	0.723636	-0.466663	0.140303	0.000409584	0.00443171	43801.6	50877.2	30728.4	36344.3
5830444B04Rik	41.8252	3.13859	1.65012	0.623898	0.0004106	0.00443947	16.4598	16.9823	62.1842	71.6744
Naa38	1081.45	1.45834	0.544323	0.170343	0.000413431	0.00446681	944.381	775.823	1328.16	1277.44
Tubb2a	414.461	1.60959	0.686691	0.224326	0.00041658	0.00449754	271.587	338.752	558.485	489.019
Clic5	17.2337	7.03533	2.81462	1.08124	0.000417887	0.00450837	3.08621	2.68142	30.5055	32.6617
Plag1	235.667	0.574515	-0.799583	0.26968	0.000418803	0.00451496	278.788	337.858	165.433	160.587
Hoxa5	8.70623	0.783322	-0.352323	0.693895	0.000419823	0.00452265	13.3736	21.4513	0	0
Lrrc8e	179.227	1.89074	0.918949	0.318287	0.000423913	0.00456339	95.6726	134.965	263.99	222.281
Enpp5	365.424	1.65739	0.728917	0.241333	0.000424808	0.0045697	224.265	301.212	499.82	436.397
Rad50	1412.38	1.47076	0.556557	0.175588	0.000428915	0.00461053	971.128	1259.37	1594.5	1824.52
BC052040	471.883	1.562	0.643398	0.208209	0.000429806	0.00461675	332.282	379.867	550.272	625.109
Hnrnpdl	3692.83	0.739511	-0.435357	0.132633	0.000430463	0.00462045	4309.38	4267.92	3213.63	2980.38
Aff4	5405.48	1.35113	0.434168	0.132452	0.00044049	0.00472465	4270.29	4799.74	6341.62	6210.27
Gmip	547.403	1.51146	0.595943	0.19075	0.000442107	0.00473856	413.552	433.496	659.387	683.175
mt-Nd5	34360.5	1.37336	0.457713	0.140626	0.000448422	0.00480276	27273.9	29747.6	35990.6	44429.9
Qsox2	817.418	0.671456	-0.574636	0.183516	0.00045451	0.00486444	1100.75	891.124	621.842	655.956
Pon3	407.442	1.58868	0.667826	0.218955	0.000456646	0.00488377	283.932	322.664	475.181	547.991
Copg1	4648.99	1.39027	0.475369	0.147397	0.000459679	0.00491265	3420.55	4225.02	5264.54	5685.86
Chic1	451.099	1.56732	0.648297	0.211723	0.00046138	0.00492371	372.403	306.575	562.005	563.415
Bnip3l	2577.87	1.37308	0.457417	0.140915	0.000461276	0.00492371	2145.95	2131.73	3191.34	2842.48
Cadm1	2305.56	0.731248	-0.451568	0.139187	0.000464282	0.00495112	2682.95	2702.87	1982.86	1853.55
Atp6v1b2	3978.52	1.40328	0.4888	0.151739	0.00046723	0.00497896	3096.5	3410.76	4182.77	5224.06
Gm48684	40.9866	3.19591	1.67623	0.650857	0.000478507	0.00509546	19.546	12.5133	57.4911	74.3962
Arhgap9	191.014	1.79653	0.845213	0.29209	0.000480168	0.00510947	134.765	122.451	234.657	272.181
Itgb5	2293.84	0.733021	-0.448073	0.138385	0.000480884	0.00511341	2734.38	2618.85	1887.82	1934.3
Tmem97	2494.5	1.37176	0.456024	0.141113	0.000483427	0.00513676	1994.72	2146.03	3044.68	2792.58
Zfp61	62.9182	0.397071	-1.33253	0.503578	0.000484239	0.0051417	95.6726	93.8496	34.0253	28.1254
Ptpn6	595.547	1.50845	0.593062	0.191408	0.000484888	0.0051449	488.65	434.389	693.413	765.736
Orai2	639.324	0.673159	-0.570981	0.183528	0.00049244	0.00522128	799.329	757.053	481.048	519.866
Slc35a2	392.115	1.57424	0.654657	0.215702	0.000497156	0.0052675	281.874	305.681	472.835	508.071
Rnf32	21.7469	0.195784	-2.35267	0.935926	0.000499194	0.00528531	33.9483	42.9027	4.69315	5.44362
Gfi1b	8.36053	0.794055	-0.332689	0.645335	0.000501152	0.00529467	16.4598	16.9823	0	0
Tfe3	1024.13	1.48497	0.570433	0.183276	0.000500923	0.00529467	730.404	875.036	1111.1	1379.96
Mgam	53.4868	2.74359	1.45606	0.557528	0.000500616	0.00529467	22.6322	25.9204	69.2239	96.1707
Gng5	4485.21	0.747182	-0.420469	0.129371	0.000502648	0.00529912	5329.89	5039.28	3755.69	3815.98
Mrfap1	3911.96	0.741322	-0.431828	0.13317	0.000502583	0.00529912	4395.79	4682.65	3172.57	3396.82
Gm49172	305.138	1.86005	0.895341	0.314454	0.000501962	0.00529912	176.943	221.664	283.935	538.011
Uprt	396.369	1.57949	0.659459	0.217884	0.000503437	0.00530365	276.73	315.513	475.181	518.051
Pias2	902.442	1.43598	0.522034	0.165443	0.000504855	0.00531481	718.059	732.027	1050.09	1109.59
Rbl2	826.257	1.5007	0.585634	0.189692	0.000510675	0.00536463	569.92	714.151	930.417	1090.54
E2f6	917.996	0.67262	-0.572137	0.184813	0.000510647	0.00536463	1128.52	1105.64	815.435	622.387
Msrb1	895.733	1.4368	0.522857	0.165561	0.000510371	0.00536463	718.059	721.301	1043.05	1100.52
Gas2	459.678	0.607551	-0.718922	0.242679	0.00051722	0.00542952	625.472	550.584	261.643	401.013
Mad2l2	685.412	1.47264	0.558407	0.17958	0.000518051	0.00543054	547.288	533.602	794.315	866.443
Rpl27a	20604.4	0.754497	-0.406413	0.124506	0.000517964	0.00543054	22518	24868.4	17382.2	17649.1
Hoxb3	14.8961	0.0700396	-3.83569	1.44619	0.000520127	0.00544844	41.1495	16.0885	2.34657	0
Elovl6	3660.26	0.726252	-0.461459	0.144243	0.00052059	0.00544943	4021.33	4562.88	2820.58	3236.23
Zfp984	598.521	1.61767	0.693922	0.232883	0.000527531	0.00551818	528.771	349.478	679.333	836.503
Fam91a1	5495.52	1.3471	0.429857	0.132988	0.000530061	0.00554073	4512.04	4725.55	6742.88	6001.59
Tfdp2	1686.25	1.3859	0.470822	0.147811	0.000530621	0.00554267	1330.16	1447.07	2038	1929.76
Myo5b	44.3395	2.97586	1.57331	0.614774	0.000536535	0.00560049	15.4311	21.4513	63.3575	77.118
Fmn1	488.15	1.61021	0.68725	0.230663	0.000542164	0.00565525	291.133	426.345	593.683	641.44
Slc35b4	1328.1	1.4141	0.499887	0.158458	0.000544056	0.00567099	1025.65	1130.66	1667.24	1488.83
Zfand1	663.816	0.618166	-0.693933	0.234164	0.000547007	0.00569773	975.243	709.682	394.224	576.117
Itgav	2104.79	0.7214	-0.471128	0.148401	0.000548167	0.0057058	2614.02	2339.98	1637.91	1827.24
Cdkn2aipnl	4524.58	1.36106	0.444726	0.138658	0.000549352	0.00571411	4066.6	3485.84	5153.08	5392.82
Pradc1	454.485	1.53617	0.619338	0.204129	0.000549934	0.00571614	363.144	330.708	556.138	567.951
Synj1	449.053	1.57785	0.657964	0.219308	0.000550766	0.00572078	306.564	364.673	508.033	616.944
9930111J21Rik2	118.096	2.06969	1.04941	0.38577	0.000558227	0.0057942	54.5231	84.9115	175.993	156.958
Pspc1	1050.3	0.687535	-0.540494	0.174324	0.000560147	0.00581005	1347.65	1182.5	911.644	759.385
Gabpa	1502.44	1.38746	0.472445	0.148832	0.000562512	0.00583049	1250.94	1222.73	1826.81	1709.3
E130311K13Rik	174.011	0.555777	-0.847422	0.299663	0.000569623	0.00589593	231.466	231.496	119.675	113.409
Rpa3	2054.18	1.41566	0.501476	0.159737	0.000569242	0.00589593	1806.46	1526.62	2648.11	2235.51
Hnrnph1	6972.11	0.732349	-0.449397	0.141065	0.000570671	0.00590266	8955.16	7329.21	5854.7	5749.37
Usp44	8.53756	0.815759	-0.293785	0.569507	0.000572095	0.00591325	8.2299	25.9204	0	0
Tubg1	2243.96	1.36971	0.453872	0.142568	0.000573377	0.00591823	1851.73	1875.2	2766.61	2482.29
Mctp1	61.2186	0.40029	-1.32088	0.509998	0.000573205	0.00591823	97.73	86.6991	30.5055	29.9399
Clspn	1108.42	1.45527	0.541282	0.174833	0.000575843	0.00593953	828.134	933.133	1474.82	1197.6
mt-Rnr1	9211.77	0.758365	-0.399035	0.123405	0.000578342	0.00596116	10555.9	10584.4	7667.43	8039.32
Grin2d	146.989	1.9548	0.967023	0.35146	0.00058052	0.00597527	97.73	85.8053	163.087	241.334
B3galt4	67.5069	2.38865	1.2562	0.480368	0.00058025	0.00597527	33.9483	35.7522	103.249	97.0779
Dusp3	502.797	1.57374	0.654197	0.219058	0.000581002	0.00597608	317.88	434.389	606.589	652.327
Specc1	2906.48	1.38571	0.470621	0.148754	0.000583381	0.00599638	2178.87	2609.02	3569.14	3268.9
Slc2a8	202.007	1.73918	0.79841	0.278998	0.000584831	0.00600294	140.937	137.646	266.336	263.108
Jpt1	4947.74	0.741038	-0.432381	0.135587	0.0005848	0.00600294	5802.08	5688.18	4442.07	3858.62
Gprin3	58.8312	0.390216	-1.35765	0.527579	0.000586411	0.00601498	96.7013	82.2301	24.639	31.7545
Fam92a	647.639	1.49708	0.582156	0.190978	0.000587186	0.00601831	474.248	532.708	854.153	729.445
Sult1a1	141.796	1.98016	0.985614	0.359945	0.000587549	0.00601831	78.184	96.531	158.394	234.076
Ndel1	1106.82	1.41504	0.500846	0.160057	0.00059023	0.00604159	893.973	901.85	1382.13	1249.31
Itgb3	607.614	1.50392	0.588729	0.193658	0.000595777	0.00609414	460.874	481.761	675.813	812.007
Dyrk3	254.806	0.60122	-0.734036	0.252925	0.000597968	0.00611234	325.081	329.814	178.34	185.99
Fkbp1a	8974.74	0.744438	-0.425777	0.133188	0.000600128	0.00613018	9690.71	11099.3	7283.77	7825.21
Vdac1	7918.78	1.37332	0.457673	0.144771	0.000602123	0.00614631	5882.32	7242.51	8812.56	9737.73
Spats2l	673.933	1.50194	0.586831	0.193054	0.000604308	0.00616436	496.88	549.69	739.171	909.992
Sec24a	950.315	1.49863	0.583644	0.1923	0.00060548	0.00617205	679.995	797.275	998.467	1325.52
Ssh2	1081.74	1.49337	0.578575	0.190123	0.000606746	0.00617645	743.777	941.177	1480.69	1161.31
Rfx3	369.342	0.633931	-0.657602	0.221791	0.000606388	0.00617645	467.047	459.416	256.95	293.956
Anp32e	3018.36	0.738709	-0.436921	0.137487	0.000612257	0.0062199	3536.8	3482.27	2661.02	2393.38
Styk1	791.576	1.492	0.577247	0.189319	0.00061151	0.0062199	546.26	688.23	1025.45	906.363
Acsbg1	2658.75	0.686925	-0.541775	0.176396	0.000612276	0.0062199	3580.01	2830.68	2405.24	1819.08
Pdgfrl	58.292	0.381921	-1.38866	0.544656	0.000613253	0.00622555	88.4714	90.2744	19.9459	34.4763
Rplp2	12807.7	0.724652	-0.46464	0.14541	0.000613902	0.00622786	13301.6	16707.9	10137.2	11084.1
Stxbp5	567.509	1.51704	0.601257	0.199389	0.000619772	0.0062831	389.891	483.549	701.626	694.969
Ripk1	1345.1	1.43272	0.518753	0.167574	0.000622409	0.00630551	972.157	1189.66	1698.92	1519.68
1810019D21Rik	97.6854	2.10317	1.07256	0.402462	0.000623736	0.00631463	62.753	50.9469	145.488	131.554
Plekhm1	863.1	1.45532	0.541335	0.176182	0.000625598	0.00632915	631.645	740.071	993.774	1086.91
Hmgb1	4436.73	0.742056	-0.4304	0.13553	0.000628807	0.00635293	5341.2	4954.36	3929.34	3522.02
Fam107a	85.79	0.441912	-1.17817	0.450598	0.000628544	0.00635293	111.104	139.434	36.3719	56.2508
Serf1	396.678	0.63736	-0.649819	0.219749	0.000629557	0.00635617	507.168	484.443	323.827	271.274
Dcaf17	857.798	1.43914	0.525206	0.170124	0.000637592	0.00643289	703.656	671.248	1078.25	978.037
Letmd1	1227.65	1.40325	0.488769	0.15677	0.000639585	0.0064486	950.553	1052.9	1473.65	1433.49
Nrep	22.3776	0.214155	-2.22327	0.923152	0.000640462	0.00645304	44.2357	33.9646	5.86644	5.44362
Slit3	16.4867	6.50155	2.70078	1.11293	0.000646065	0.00650507	3.08621	2.68142	29.3322	30.8472
Ddx5	12928.6	0.76358	-0.389149	0.121186	0.000646749	0.00650753	14629.7	14941.7	11188.5	10954.4
Lsm5	1266.83	1.40489	0.490458	0.157903	0.00065152	0.00655108	1036.97	1027.88	1598.02	1404.45
Snx12	1111.91	1.40135	0.486812	0.156308	0.000653179	0.0065633	917.634	899.168	1323.47	1307.38
Efr3a	3712.78	1.33827	0.420366	0.132302	0.000661008	0.00663745	3028.6	3237.36	4368.15	4216.99
Bid	2548.16	0.737084	-0.440099	0.139644	0.00066511	0.00667412	3076.95	2857.5	2054.43	2203.76
Tm4sf4	27.2178	4.04839	2.01735	0.837876	0.000665782	0.00667633	7.20116	8.93806	32.852	59.8798
Myo1d	1486.34	1.46764	0.5535	0.182163	0.000667228	0.00668629	1117.21	1229.88	1508.85	2089.44
Dynlt1a	309.018	1.61645	0.692828	0.238581	0.000672865	0.00673822	209.862	242.221	376.625	407.364
Uhmk1	2069.85	1.36075	0.444404	0.141208	0.000673898	0.006744	1770.46	1683.04	2353.61	2472.31
Pnp	621.411	0.681754	-0.552677	0.182278	0.00067534	0.00675385	759.208	745.434	489.261	491.741
Gnpda1	420.659	1.56142	0.64286	0.218254	0.000677984	0.00677572	350.799	282.443	526.806	522.588
Duoxa1	18.0834	0.153882	-2.7001	1.13597	0.000686605	0.00684799	47.3219	18.7699	3.51986	2.72181
Gsdme	961.811	0.697169	-0.520419	0.17008	0.00068635	0.00684799	1231.4	1072.57	740.344	802.934
Birc6	3739.47	1.38758	0.472566	0.151798	0.000686261	0.00684799	2704.55	3446.51	4417.43	4389.37
Marcks	2901.44	0.681381	-0.553466	0.183002	0.000687097	0.00684828	3690.08	3340.15	1837.37	2738.14
Ier2	1217.22	0.699574	-0.515451	0.168022	0.000689577	0.00686837	1353.82	1556.12	901.085	1057.88
Gng12	2196.67	1.35239	0.435511	0.13856	0.000690688	0.00687481	1828.07	1851.07	2507.31	2600.24
Rpf1	1201.41	0.708787	-0.496576	0.161276	0.000691513	0.00687839	1422.74	1430.09	1050.09	902.734
Mki67	5368.6	1.46107	0.547026	0.180512	0.000695611	0.00691215	3358.83	5141.17	6476.55	6497.87
Ero1l	1812.13	0.694711	-0.525515	0.17202	0.000695841	0.00691215	2247.79	2096.87	1667.24	1236.61
Ccdc137	897.549	0.684634	-0.546595	0.180614	0.000697781	0.00692676	1172.76	995.699	768.503	653.235
Myo9a	760.967	1.46327	0.549199	0.180806	0.00069861	0.00693034	579.179	625.664	848.287	990.739
En1	449.149	0.622594	-0.683637	0.23619	0.000699733	0.00693683	468.075	668.567	309.748	350.206
Agfg2	2774.44	1.35616	0.439531	0.139912	0.000700317	0.00693797	2178.87	2459.75	3226.54	3232.6
Rabl6	2997.75	1.34881	0.431688	0.137668	0.000708025	0.00700963	2507.03	2520.53	3670.04	3293.39
Ankrd1	974.548	0.638638	-0.64693	0.221733	0.000710536	0.0070298	1224.2	1211.11	913.991	548.899
Wdr7	584.644	1.55546	0.637342	0.216982	0.000712429	0.00704381	387.834	494.274	633.575	822.894
Sgo1	1295.88	1.41848	0.504344	0.164449	0.000715993	0.00707432	1021.54	1075.25	1689.53	1397.2
Acad9	1425.31	0.717115	-0.479723	0.154819	0.000716797	0.00707753	1791.03	1573.1	1180.33	1156.77
Synrg	1121.82	1.42884	0.51484	0.168615	0.000725674	0.0071604	897.059	909.894	1209.66	1470.69
Kdm5b	997.833	0.659001	-0.601648	0.203811	0.00073451	0.00724276	988.617	1469.42	740.344	792.954
Gm8129	396.588	0.643552	-0.635872	0.21739	0.000736632	0.00725885	528.771	459.416	293.322	304.843
Nde1	1675.44	0.72942	-0.455178	0.146621	0.00073851	0.0072725	1904.19	2018.21	1430.24	1349.11
Pip4k2c	2144.03	1.36083	0.444489	0.14269	0.000751784	0.0073983	1879.5	1696.44	2517.87	2482.29
Gbp6	24.7454	0.239216	-2.06361	0.875288	0.000756727	0.00744198	43.207	42.0089	4.69315	9.0727
Suv39h2	403.831	0.642542	-0.638137	0.219372	0.000758552	0.00745003	489.679	516.62	333.214	275.81
Phlda1	665.688	0.677085	-0.562591	0.188371	0.000758328	0.00745003	783.898	834.814	475.181	568.859
Myof	6841.23	1.38952	0.474586	0.154044	0.000759934	0.00745865	4998.63	6241.44	7350.64	8774.21
Cep192	1379.31	1.40835	0.494007	0.161515	0.000763986	0.00749345	1015.36	1228.09	1626.18	1647.6
Tmco4	754.366	1.45741	0.543411	0.180325	0.000771307	0.00755131	641.932	555.947	870.579	949.005
Vps54	1398.96	1.3969	0.482233	0.157262	0.000771417	0.00755131	1192.31	1096.7	1759.93	1546.9
Cbx2	535.109	0.673418	-0.570425	0.192052	0.000770609	0.00755131	647.076	656.947	431.77	404.643
Mpzl3	705.823	0.652028	-0.616994	0.211097	0.000771969	0.00755172	1009.19	738.283	591.337	484.482
Ift74	401.703	0.651916	-0.617242	0.211246	0.000778321	0.00760882	489.679	505	310.921	301.214
Park7	3578.75	0.740798	-0.432847	0.139113	0.00078041	0.0076242	4454.43	3861.24	2967.24	3032.1
Aifm3	22.8061	4.3035	2.10551	0.901797	0.000781091	0.00762582	6.17242	6.25664	43.4116	35.3835
Zfp512b	730.106	1.45318	0.539211	0.178867	0.000782186	0.00763148	616.214	545.221	903.431	855.556
Cr1l	1115.26	0.714489	-0.485017	0.15876	0.000784297	0.00764199	1308.55	1329.98	951.536	870.98
Wdfy4	12.9193	13.1711	3.7193	1.48081	0.000783882	0.00764199	2.05747	0	18.7726	30.8472
C2cd2	327.824	1.60641	0.683842	0.239245	0.000788957	0.00768233	211.92	269.035	412.997	417.344
Gm49890	189.278	0.565982	-0.821172	0.30029	0.00079228	0.00770962	278.788	222.558	119.675	136.091
Krt20	5975.84	1.34599	0.428672	0.137726	0.000798953	0.00776943	4770.26	5270.77	6447.21	7415.12
Cst9	43.3047	2.85654	1.51427	0.6279	0.000803804	0.00781067	14.4023	22.3451	65.7041	70.7671
Smpdl3b	885.606	0.705164	-0.50397	0.166457	0.000804249	0.00781067	1028.74	1080.61	734.478	698.598
2610002M06Rik	890.678	1.42001	0.505906	0.167014	0.000806359	0.00782602	745.835	694.487	1033.67	1088.72
Rsl24d1	1216.57	0.718387	-0.477167	0.156134	0.000807744	0.00783432	1429.94	1441.71	950.363	1044.27
R74862	88.4831	2.19701	1.13554	0.446566	0.000808565	0.00783714	38.0633	59.885	112.636	143.349
Map3k1	1021.46	1.44432	0.530386	0.176502	0.000810326	0.00784908	763.323	867.885	1106.41	1348.2
Ftl1	35687.7	1.33269	0.414338	0.13153	0.000811205	0.00785244	30411.5	30051.5	37667.2	44620.5
Pcolce	2299.7	1.40412	0.489669	0.160835	0.000812099	0.00785596	1819.84	1929.73	2381.77	3067.48
Ccnl1	1107.82	0.70867	-0.496815	0.163819	0.000817918	0.00789814	1412.46	1220.04	906.951	891.847
Itgb3bp	354.047	1.5609	0.642376	0.222566	0.000817053	0.00789814	275.702	256.522	429.423	454.542
Zfp263	905.978	0.691486	-0.532228	0.177888	0.000818062	0.00789814	1197.45	982.292	747.384	696.784
Ttn	40.403	2.97119	1.57104	0.660215	0.000822183	0.00792508	20.5747	12.5133	58.6644	69.8598
Tmem125	201.758	1.7188	0.781399	0.283298	0.00082246	0.00792508	151.224	128.708	263.99	263.108
Tspan17	400.389	1.55483	0.636758	0.220286	0.000821673	0.00792508	304.506	299.425	450.542	547.084
Pde5a	308.038	0.629982	-0.666618	0.233505	0.00082492	0.00793711	387.834	387.912	232.311	224.096
Zfp239	311.472	1.67536	0.744468	0.266718	0.000824939	0.00793711	206.776	235.071	325.001	479.039
Papln	89.8646	2.2528	1.17172	0.465681	0.000825318	0.00793711	47.3219	50.0531	91.5164	170.567
Tgif1	2070.25	0.702202	-0.510042	0.169377	0.000827475	0.00795269	2126.4	2815.49	1762.28	1576.84
Ptbp3	4079.41	1.38094	0.465651	0.152081	0.000831149	0.00797763	3719.91	3011.23	4474.92	5111.56
Tuba1c	9607.16	1.45483	0.540851	0.181329	0.000830889	0.00797763	8328.66	6919.84	13898.8	9281.38
Rpl35a	14023.8	0.758766	-0.398273	0.12696	0.000831757	0.00797829	15447.5	16732.9	12465	11449.8
Son	6764.04	1.31668	0.396902	0.126784	0.000833007	0.0079851	5601.47	5934.87	7951.37	7568.45
B4galt2	453.1	0.648933	-0.623858	0.215518	0.00083355	0.00798512	577.122	548.797	302.708	383.775
Spag5	2013.05	1.38218	0.466945	0.152627	0.000835684	0.00800039	1507.1	1810.85	2413.45	2320.8
Tmem63a	2553.35	1.42794	0.51394	0.170374	0.000837265	0.00800516	1919.62	2193.4	2596.48	3503.88
Gm4737	3231.03	1.36218	0.445912	0.144695	0.000836981	0.00800516	2908.24	2474.95	3928.17	3612.75
Tpmt	277.561	0.600109	-0.736703	0.264227	0.000838296	0.00800984	342.57	373.611	165.433	228.632
Zfp827	630.107	0.679848	-0.556716	0.188141	0.000839911	0.00802009	709.829	818.726	509.207	482.668
Ndrg4	30.2352	3.56574	1.8342	0.791406	0.000844767	0.00806126	10.2874	9.83186	64.5308	36.2908
Gp9	7.58897	0.826906	-0.274204	0.536418	0.000851854	0.00812365	13.3736	16.9823	0	0
Thap12	2156.21	0.738049	-0.438212	0.142482	0.00085697	0.00816716	2609.91	2410.59	1859.66	1744.68
Cd300lb	106.878	1.98031	0.985729	0.37959	0.000860857	0.00819893	67.8967	62.5664	153.701	143.349
Ppp3ca	1488.2	0.725395	-0.463161	0.151924	0.000861885	0.00820344	1795.15	1700.02	1291.79	1165.84
Klhl36	286.007	0.599266	-0.738731	0.266385	0.00086695	0.00824634	412.524	326.239	174.82	230.447
Lurap1l	3542.43	0.730493	-0.453057	0.148378	0.000869319	0.00825825	4029.56	4265.24	2630.51	3244.4
Apol9b	75.0856	0.441932	-1.1781	0.473172	0.000868994	0.00825825	96.7013	123.345	34.0253	46.2708
Aldh9a1	3370.56	1.33403	0.415791	0.134215	0.000875095	0.00830779	2851.66	2845.88	3722.84	4061.85
Ptpn22	65.5495	0.42499	-1.2345	0.503709	0.000877593	0.00832616	105.96	88.4867	38.7185	29.0327
Ncam1	127.122	0.52746	-0.922866	0.351483	0.000879331	0.00833195	168.713	178.761	73.9171	87.098
Mfap3	982.485	1.43641	0.522464	0.17514	0.000878824	0.00833195	721.145	851.797	1260.11	1096.89
Ddt	302.457	1.60156	0.679477	0.240497	0.000883887	0.00836977	224.265	220.77	351.986	412.808
Igf2bp2	1639.7	0.733305	-0.447515	0.146456	0.000891825	0.00843953	1868.19	1962.8	1326.99	1400.83
Smarca2	132.975	0.53114	-0.912836	0.348247	0.000894213	0.00845671	199.575	162.673	87.9965	81.6543
Glis3	827.91	0.662738	-0.59349	0.204539	0.00089593	0.00846754	963.927	1072.57	522.113	753.034
Sptbn1	6810.92	1.37524	0.459688	0.150348	0.000907781	0.00857406	4941.03	6335.29	7640.45	8326.93
Hacd2	1691.54	0.72641	-0.461143	0.151383	0.000910825	0.00859419	2124.34	1844.81	1388	1408.99
mt-Nd1	67002.6	1.33968	0.421885	0.133032	0.000911074	0.00859419	54472.7	59031.4	70908.8	83597.7
Vps50	2218.77	1.35933	0.442899	0.145153	0.000919584	0.00866592	1976.2	1724.15	2555.42	2619.29
Mrs2	730.915	1.43133	0.517353	0.173843	0.00091985	0.00866592	574.035	599.744	875.272	874.609
Lcor	867.249	1.46473	0.550631	0.187473	0.000921167	0.00867281	611.07	756.159	1142.78	958.985
Tbl1x	3503.51	1.42	0.505895	0.169212	0.000922747	0.00867843	2351.69	3308.87	4066.61	4286.85
Scamp2	1157.46	1.39143	0.476565	0.157857	0.000922938	0.00867843	928.95	968.885	1425.54	1306.47
Cab39l	1107.28	1.38637	0.471315	0.156005	0.000931179	0.00875036	906.318	914.363	1304.7	1303.75
Syt13	966.17	0.712653	-0.488727	0.163085	0.000935619	0.00878651	1118.24	1171.78	810.741	763.922
1700001C19Rik	23.4382	0.230806	-2.11525	0.944703	0.0009375	0.00879858	26.7472	54.5221	7.03972	5.44362
Smpd1	767.761	1.43927	0.525333	0.177484	0.000941603	0.00883149	656.334	572.036	896.391	946.283
Pla2g12a	526.766	0.676061	-0.564774	0.194009	0.000945453	0.00886198	613.127	669.46	407.131	417.344
Aftph	1784.73	1.3627	0.446466	0.147176	0.000949555	0.00889479	1427.89	1541.81	1998.11	2171.1
Gprc5a	2810.59	1.42853	0.514529	0.17343	0.00095119	0.00890447	1892.88	2625.11	3596.13	3128.27
Glul	5071.89	1.37475	0.45917	0.1517	0.000954342	0.00892832	4338.19	4053.41	5209.39	6686.58
Hr	48.9008	0.383809	-1.38154	0.584699	0.000961134	0.00898618	83.3277	67.0354	23.4657	21.7745
Msra	239.701	0.604868	-0.725307	0.263821	0.000963286	0.00900061	290.104	326.239	161.914	180.547
Sdhaf1	329.815	0.632697	-0.660413	0.23535	0.00096911	0.00904931	452.644	377.186	249.91	239.519
Icam1	762.129	0.695002	-0.52491	0.178172	0.000970887	0.00906018	876.484	952.797	647.655	571.58
Cat	2011.62	1.46057	0.546535	0.186838	0.000975194	0.00907287	1436.12	1744.71	2008.67	2856.99
Taz	877.424	1.44926	0.535321	0.18219	0.000973686	0.00907287	772.582	623.876	997.294	1115.94
Hdac11	312.202	1.59609	0.674539	0.241433	0.000974723	0.00907287	239.696	219.876	431.77	357.465
Efnb2	860.06	0.671874	-0.573738	0.198419	0.000975092	0.00907287	906.318	1193.23	739.171	601.52
Zkscan7	20.7773	0.21667	-2.20643	0.989318	0.000975314	0.00907287	45.2644	27.708	4.69315	5.44362
Ncapg	1470.94	1.40438	0.489937	0.164157	0.000982069	0.00912997	1122.35	1271.89	1905.42	1584.09
Ankrd26	642.781	1.5262	0.609939	0.213483	0.000984886	0.00915041	417.667	563.097	879.965	710.393
Rab1a	4943.29	1.31724	0.397519	0.130577	0.000991242	0.00920368	4297.04	4113.29	5442.88	5919.94
Ldlrap1	1250.62	1.40669	0.492301	0.165341	0.000994185	0.00922521	950.553	1082.4	1596.84	1372.7
Il22ra1	844.442	0.70572	-0.502833	0.169814	0.000997225	0.00924459	1035.94	976.036	709.839	655.956
Rps27a	55759.3	1.34171	0.424076	0.14267	0.000997523	0.00924459	49554.3	43828.6	71727.7	57926.5
Ap5m1	531.979	1.47033	0.556142	0.191505	0.00101243	0.00937688	416.639	420.089	628.882	662.307
Rpl9	20379.4	0.769909	-0.377241	0.121204	0.00101894	0.00943121	22821.5	23586.6	18018.2	17091.2
Cyp4f14	69.5033	2.53494	1.34195	0.569528	0.00102204	0.00945403	36.0058	30.3894	61.0109	150.607
2022-09-06	918.309	1.4048	0.490363	0.165061	0.00102511	0.00946466	725.26	769.567	1060.65	1117.76
Fam98c	59.7715	2.36786	1.24358	0.518634	0.00102394	0.00946466	27.7759	33.0708	93.863	84.3761
Osbpl7	278.769	1.59776	0.676051	0.243386	0.0010249	0.00946466	210.891	199.319	343.773	361.094
Fanca	858.892	1.49031	0.575615	0.200052	0.00102805	0.00948593	654.277	681.08	1231.95	868.258
Fbxo4	631.443	1.45068	0.53673	0.18378	0.00102912	0.00948988	524.656	479.08	742.691	779.345
Pwwp3b	247.705	1.64481	0.71792	0.262402	0.00103072	0.00949867	192.374	163.566	299.188	335.69
Ahnak2	587.296	1.528	0.611649	0.215438	0.00103742	0.00955443	390.92	505	639.441	813.822
Tom1l1	1225.2	1.38629	0.471229	0.15773	0.00103907	0.00956163	1034.91	979.611	1365.71	1520.59
Mppe1	1289.65	0.712185	-0.489675	0.165006	0.00103949	0.00956163	1529.73	1530.2	940.976	1157.68
Zfp280c	673.381	1.49886	0.583867	0.204185	0.00105245	0.00967482	529.8	512.151	953.882	697.691
Scarb1	1222.93	1.45062	0.53667	0.184325	0.00105393	0.00968244	893.973	1047.54	1683.67	1266.55
Rps4x	28682.5	1.32831	0.409597	0.134405	0.00105896	0.00972258	22023.2	26580	32910.7	33216.1
Lin54	759.397	1.45784	0.543829	0.186813	0.00106083	0.00973372	530.828	671.248	912.817	922.694
Rabggtb	2628.46	0.736758	-0.440738	0.146701	0.00107329	0.00983774	3037.86	3089.89	2386.47	1999.62
Necap1	1198.46	1.40055	0.485996	0.163932	0.0010735	0.00983774	994.789	959.947	1541.7	1297.4
Gcnt3	2608.96	1.33303	0.414708	0.136648	0.00107613	0.00985579	2135.66	2272.95	3062.28	2964.96
9030622O22Rik	421.522	1.60849	0.685708	0.249332	0.0010841	0.00991648	323.024	294.062	421.21	647.791
Rasgef1b	302.026	0.611055	-0.710625	0.261058	0.00108367	0.00991648	330.225	443.328	195.939	238.612
Rab17	659.366	1.45231	0.538354	0.185818	0.00109405	0.00999511	565.806	480.867	797.835	792.954
Ftsj1	609.635	1.46376	0.549675	0.190417	0.00109369	0.00999511	464.989	496.062	794.315	683.175
Hook2	833.336	1.44737	0.533436	0.183731	0.00109645	0.0100108	648.105	678.398	888.178	1118.66
E2f5	564.424	0.668541	-0.580912	0.204053	0.0010972	0.0100115	769.496	614.044	414.17	459.986
Scyl1	2832.64	1.3257	0.406757	0.134019	0.00110898	0.0101128	2451.48	2354.28	3235.93	3288.86
Fmr1	2125.64	1.4162	0.50203	0.171265	0.00111329	0.0101445	1992.66	1446.18	2506.14	2557.6
Socs1	57.9028	0.413594	-1.27371	0.542737	0.00111383	0.0101445	75.0978	99.2124	24.639	32.6617
Arrdc3	548.477	0.641012	-0.641578	0.23135	0.00112159	0.0102089	780.812	590.805	477.528	344.763
Map2k6	869.71	0.70783	-0.498525	0.170314	0.00112849	0.0102653	978.329	1091.34	725.091	684.082
Jdp2	592.908	1.45193	0.537973	0.186349	0.00113333	0.0103031	451.616	488.912	729.785	701.32
Strbp	1322.25	1.37311	0.457449	0.153804	0.00113627	0.0103171	1043.14	1144.07	1583.94	1517.86
Ncoa3	1379.71	1.44009	0.526162	0.181458	0.00113625	0.0103171	929.979	1272.78	1568.68	1747.4
Tra2b	3215.63	0.758609	-0.398571	0.131572	0.00113959	0.0103409	3733.29	3654.77	2749.01	2725.44
Hs2st1	3035.69	0.75632	-0.402931	0.133227	0.00114147	0.0103452	3447.3	3537.68	2632.86	2524.93
Gm11478	358.083	0.636339	-0.652132	0.236378	0.00114117	0.0103452	508.196	391.487	260.47	272.181
Psat1	12864.6	1.3037	0.382615	0.126869	0.00115259	0.0104396	10384.1	11651.6	14704.8	14717.7
Zfp184	150.459	0.546617	-0.871399	0.341011	0.00115398	0.0104458	230.437	175.186	109.116	87.098
2610035D17Rik	222.565	0.601309	-0.733823	0.274403	0.00115508	0.0104494	311.707	262.779	164.26	151.514
Sigmar1	2920.53	0.750215	-0.414624	0.137964	0.00116557	0.0105379	3540.91	3207.87	2527.26	2406.08
Mlx	1203.82	1.38435	0.469212	0.159002	0.00117337	0.0106019	927.921	1051.12	1449.01	1387.22
Fzd7	644.098	1.4355	0.521552	0.180228	0.00117643	0.0106184	507.168	523.77	757.943	787.511
Zfand5	1989.29	0.735162	-0.443865	0.149315	0.00117663	0.0106184	2426.79	2219.32	1546.39	1764.64
Tsc22d3	966.286	0.696397	-0.522018	0.180826	0.00118267	0.0106664	1142.93	1178.04	672.294	871.887
Gas5	4575.65	0.702346	-0.509746	0.175956	0.00118741	0.0107026	5347.38	5588.07	4402.17	2964.96
Midn	1406.89	0.686881	-0.541868	0.189319	0.00119295	0.010746	1481.38	1920.79	959.749	1265.64
Pilrb1	288.482	0.629636	-0.667411	0.244657	0.00119657	0.0107655	390.92	337.858	206.499	218.652
Fst	607.555	0.691626	-0.531935	0.187012	0.00119609	0.0107655	762.294	703.425	504.513	459.986
Gm2381	14.0849	7.73528	2.95145	1.34355	0.00119769	0.010769	0	3.57522	24.639	28.1254
Rel	325.651	1.5666	0.647637	0.235214	0.00119862	0.0107708	223.236	262.779	388.358	428.232
Cracr2b	288.754	1.5872	0.666482	0.244065	0.00120684	0.0108381	227.351	199.319	347.293	381.054
Bmt2	1462.78	1.43507	0.52112	0.180791	0.00121346	0.0108844	1365.13	976.929	1723.56	1785.51
Ghr	228.749	0.585287	-0.772785	0.294275	0.00121289	0.0108844	302.449	296.743	124.368	191.434
Eif4ebp2	3851.93	1.34022	0.422466	0.141322	0.00121918	0.010929	2985.4	3497.46	4305.96	4618.91
Gemin8	651.935	0.69215	-0.530843	0.185145	0.0012212	0.0109405	779.783	791.018	479.874	557.064
Zfp428	291.921	0.638984	-0.646148	0.238277	0.00122256	0.0109461	371.374	361.991	222.925	211.394
Galns	515.753	1.50532	0.59007	0.210327	0.00122689	0.0109781	397.093	398.637	551.445	715.836
Rcc2	10797	0.760473	-0.395031	0.131096	0.00122911	0.0109914	12570.1	12204	9867.34	8546.49
Mccc2	261.172	1.62198	0.697757	0.259392	0.00123521	0.0110393	207.805	170.717	353.159	313.008
Ostc	2548.08	0.750547	-0.413985	0.138655	0.00123687	0.0110474	2915.44	2971.9	2252.71	2052.25
Arap1	524.82	1.46969	0.555515	0.195773	0.00124066	0.0110613	387.834	436.177	654.694	620.573
2810410L24Rik	113.057	0.525214	-0.929024	0.371617	0.0012394	0.0110613	165.627	144.796	69.2239	72.5816
Dus4l	273.33	0.625083	-0.677879	0.250733	0.00124049	0.0110613	331.253	361.097	215.885	185.083
Vps26a	2175.1	1.33709	0.419095	0.14042	0.00124532	0.0110961	1770.46	1895.76	2463.9	2570.3
Sec61a1	6941.82	1.37172	0.455987	0.154769	0.00124794	0.0110994	5050.07	6438.08	8791.44	7487.7
Tead4	462.041	1.56494	0.646109	0.235552	0.00124736	0.0110994	287.018	402.212	641.788	517.144
2700062C07Rik	243.917	0.61788	-0.694601	0.258647	0.00124745	0.0110994	302.449	319.089	185.379	168.752
Arsb	858.403	1.49385	0.579031	0.206096	0.00125053	0.0111157	684.11	648.009	849.46	1252.03
Znhit3	793.862	1.43204	0.518069	0.180266	0.00125732	0.0111694	638.846	632.814	1041.88	861.907
H2-D1	5456.61	1.30638	0.385578	0.129481	0.00126354	0.0112179	4882.39	4445.79	6237.19	6261.07
Ppp6r3	3470.57	1.32517	0.406178	0.135316	0.00127155	0.0112823	2786.85	3102.4	4025.55	3967.49
Cox10	675.782	1.42985	0.515868	0.17945	0.00127712	0.0113248	545.231	538.965	845.94	772.994
Adamts9	307.661	0.62419	-0.679943	0.252579	0.00127904	0.0113283	333.311	446.903	229.964	220.467
Thpo	41.2353	2.8044	1.48769	0.671052	0.00127858	0.0113283	11.3161	23.2389	66.8774	63.5089
Mal	432.742	1.62508	0.70051	0.26194	0.00128416	0.0113571	258.213	366.46	661.734	444.562
Arl8b	2467.37	1.36063	0.444271	0.150611	0.00128459	0.0113571	1898.02	2209.49	2692.69	3069.3
Birc3	522.226	0.655825	-0.608618	0.220074	0.00128394	0.0113571	707.771	586.336	340.253	454.542
Mindy2	936.349	1.48436	0.569843	0.202735	0.00128735	0.0113747	740.691	719.513	923.377	1361.81
Farp2	238.726	1.63668	0.710776	0.26677	0.00129022	0.0113932	153.282	189.487	310.921	301.214
Rpl22l1	2875.25	1.34643	0.429142	0.144913	0.00130288	0.0114925	2372.27	2449.03	3623.11	3056.59
Gm21411	14.8969	6.26293	2.64684	1.26304	0.00130302	0.0114925	4.11495	0.893806	24.639	29.9399
Hnrnpu	13372.7	0.760616	-0.394759	0.13031	0.00131053	0.0115519	14502.1	16136.8	11994.5	10857.3
Atp2b4	54.2421	2.4737	1.30667	0.577497	0.00132788	0.0116978	23.661	28.6018	62.1842	102.522
Lrrc14	970.438	0.713692	-0.486626	0.168671	0.00133615	0.0117637	1202.59	1098.49	841.247	739.425
Lgr4	1779.65	1.43227	0.5183	0.181554	0.00133996	0.0117902	1254.03	1597.23	1846.75	2420.6
Itga3	8681.83	1.33583	0.417733	0.141053	0.00134154	0.0117971	6939.86	7697.45	10973.8	9116.25
Rab7	7747.18	1.30555	0.384662	0.128171	0.00134383	0.0118102	6903.86	6373.73	9161.03	8550.12
Adipor2	8207.28	1.30096	0.379581	0.126285	0.0013473	0.0118337	6831.84	7268.43	9071.86	9656.99
C030037D09Rik	131.46	1.8262	0.868846	0.346356	0.00135181	0.0118663	77.1553	93.8496	172.473	182.361
Rpap3	818.542	0.711488	-0.491088	0.170713	0.00135296	0.0118693	940.266	1003.74	688.72	641.44
Tug1	2483.58	1.32551	0.406543	0.136779	0.00136163	0.0119382	2048.22	2163.01	2825.28	2897.82
Rpl10	23831.5	1.30103	0.379656	0.126304	0.00136485	0.0119594	19203.4	21744.5	26985.6	27392.3
Tnfrsf1b	1335.77	0.729373	-0.455272	0.156447	0.00138596	0.0121372	1505.04	1628.51	1041.88	1167.66
Kif13b	412.461	1.55641	0.638221	0.235448	0.00139273	0.0121892	276.73	341.434	444.676	587.004
Zfp703	575.162	0.623794	-0.680858	0.255906	0.00139897	0.0122366	623.415	838.39	314.441	524.402
Birc2	823.769	0.708688	-0.496778	0.173901	0.00140001	0.0122385	1021.54	939.39	706.319	627.831
Tnfsf9	534.786	1.49478	0.579932	0.209357	0.00140292	0.0122567	365.202	462.097	703.972	607.871
Slc50a1	837.025	0.716155	-0.481656	0.167497	0.00140435	0.0122619	1007.13	975.142	669.947	695.876
Gm49708	23.041	0.248537	-2.00847	0.982776	0.00140684	0.0122764	53.4943	25.9204	8.21301	4.53635
Rgl2	1295.89	0.731416	-0.451237	0.155174	0.00141184	0.0123128	1597.63	1438.13	1053.61	1094.17
Tnrc18	2369.19	0.745869	-0.423005	0.144165	0.00141359	0.0123136	2798.17	2697.51	1852.62	2128.46
Ranbp1	2640.33	0.74722	-0.420395	0.14305	0.00141343	0.0123136	3224.06	2892.35	2333.67	2111.22
Iqsec1	956.793	1.44564	0.531709	0.188475	0.00142019	0.0123565	642.961	877.717	1133.4	1173.1
Snhg16	227.744	0.5961	-0.746374	0.288689	0.00141998	0.0123565	328.167	262.779	183.033	136.998
Prss8	16.4292	5.97281	2.57841	1.25993	0.00142665	0.0124054	2.05747	3.57522	12.9062	47.1781
Usp17la	18.4981	4.55817	2.18846	1.07244	0.00143292	0.0124526	6.17242	2.68142	35.1986	29.9399
Anxa11	871.287	1.45464	0.540663	0.192617	0.00143671	0.0124709	668.679	710.575	892.872	1213.02
Gldc	244.671	1.60517	0.682723	0.257479	0.00143651	0.0124709	187.23	169.823	316.788	304.843
Irak1bp1	132.141	0.547244	-0.869743	0.351885	0.00144047	0.0124962	185.173	171.611	97.3828	74.3962
Wnk1	6678.91	1.32195	0.402668	0.135678	0.00145098	0.01258	5211.58	6140.44	7722.58	7641.03
Nr1i2	150.396	0.551865	-0.857613	0.345075	0.00145395	0.0125984	181.058	224.345	80.9568	115.223
Inmt	14.7093	6.07747	2.60347	1.2788	0.00146158	0.012657	4.11495	0.893806	29.3322	24.4963
Wdr66	13.0848	6.8273	2.77132	1.3269	0.00146396	0.0126702	2.05747	1.78761	25.8123	22.6818
Hrh1	53.0839	0.421096	-1.24778	0.558204	0.00146658	0.0126855	85.3852	74.1859	24.639	28.1254
Slco3a1	628.212	0.685255	-0.545287	0.195663	0.00147092	0.0127156	812.703	710.575	447.022	542.548
Bend3	731.081	0.710702	-0.492683	0.173192	0.00148572	0.0128313	863.111	875.036	601.896	584.282
Sowahc	860.057	1.40051	0.485957	0.17012	0.00148604	0.0128313	705.714	695.381	958.576	1080.56
Stx17	658.935	1.42528	0.511243	0.180812	0.00148807	0.0128413	526.714	531.814	825.994	751.22
Racgap1	3817.34	1.32892	0.410255	0.139645	0.00150139	0.0129487	2970.99	3487.63	4406.87	4403.89
Pcca	388.536	1.53197	0.615392	0.227349	0.00150895	0.0130063	257.184	331.602	496.3	469.059
Kntc1	1271.96	1.37922	0.463851	0.161191	0.00151072	0.013014	968.042	1127.09	1434.93	1557.78
Dmxl1	1318.23	1.35936	0.44293	0.152939	0.00152493	0.0131288	1087.38	1106.53	1607.4	1471.59
Znrf1	912.639	0.712302	-0.489439	0.172433	0.00152768	0.0131448	993.76	1173.57	755.597	727.631
Inip	698.205	0.697043	-0.520681	0.185837	0.00153134	0.0131686	793.156	883.08	603.07	513.515
Rpl7	40595.4	0.765524	-0.38548	0.129767	0.001538	0.0132174	43357.2	49448.9	36353.1	33222.4
Cdc25b	2055.38	1.34159	0.423942	0.145451	0.0015388	0.0132174	1614.09	1839.45	2398.2	2369.79
Ctsb	4777.3	1.31044	0.390053	0.133702	0.00154077	0.013219	3860.85	4284.9	5682.23	5281.22
Psmb3	6378.46	1.35668	0.440083	0.15187	0.00153998	0.013219	5805.16	4828.34	8180.16	6700.19
Trim68	435.925	1.5061	0.590815	0.216729	0.00154322	0.0132247	345.656	325.345	477.528	595.169
2410006H16Rik	6929.78	1.34512	0.427733	0.147471	0.00154311	0.0132247	5757.84	5857.11	9040.18	7064.01
Lrrc8b	831.783	0.718106	-0.477731	0.167732	0.00154776	0.0132437	994.789	972.46	695.759	664.122
Ppil6	18.5825	0.22665	-2.14146	1.05747	0.00154813	0.0132437	34.9771	30.3894	3.51986	5.44362
Rpl26	32031.7	1.34289	0.425343	0.145945	0.00154784	0.0132437	26015.7	27783.9	41900.4	32426.7
Ccnd1	11311.3	0.735849	-0.442519	0.153973	0.00154972	0.0132497	13508.4	12928	10793.1	8015.73
Zfp930	624.411	0.683538	-0.548906	0.198555	0.00155472	0.0132771	846.651	668.567	511.553	470.873
Cdh1	8744.68	0.745214	-0.424274	0.145941	0.00155401	0.0132771	9499.36	10791.8	6577.45	8110.09
Kif12	470.941	0.638865	-0.646418	0.243162	0.00155725	0.013291	626.501	557.735	272.203	427.324
Atxn7l2	273.523	0.636445	-0.651893	0.24594	0.00156067	0.0133085	356.972	331.602	195.939	209.579
Arid1a	2186.67	0.73891	-0.43653	0.150963	0.00156111	0.0133085	2403.13	2693.93	1687.19	1962.43
4930523C07Rik	484.7	0.685098	-0.545618	0.197385	0.00156825	0.0133617	604.898	570.248	378.972	384.683
Pqlc2	167.475	1.70974	0.773776	0.305697	0.00157695	0.0134281	111.104	119.77	207.672	231.354
Rpain	505.27	1.50269	0.587543	0.216063	0.0015799	0.0134455	442.357	336.071	662.907	579.746
Zfp940	171.318	0.585651	-0.771887	0.305889	0.00158292	0.0134635	211.92	236.858	126.715	109.78
Abca6	38.3461	0.369974	-1.43451	0.676507	0.00158557	0.0134782	65.8392	54.5221	17.5993	15.4236
Spin4	44.6839	0.396405	-1.33495	0.619365	0.00158652	0.0134786	70.9829	66.1416	23.4657	18.1454
Man2a2	1411.35	1.36015	0.44377	0.15405	0.00158892	0.0134912	1103.84	1243.28	1694.23	1604.05
Ncapd3	1640.52	1.37377	0.458139	0.159876	0.00159083	0.013492	1227.28	1481.04	2027.44	1826.34
1110038F14Rik	453.249	0.676121	-0.564647	0.206324	0.00159077	0.013492	588.438	518.407	341.427	364.723
Gas2l1	1113.74	1.4074	0.493033	0.17451	0.0015966	0.0135331	809.616	996.593	1234.3	1414.43
Tppp3	133.381	0.55903	-0.839003	0.341052	0.00159807	0.0135378	185.173	172.504	83.3034	92.5416
Megf6	25.0055	0.24634	-2.02128	1.00983	0.00160923	0.01362	50.4081	36.646	1.17329	11.7945
Pomk	635.89	0.702448	-0.509536	0.181942	0.00160961	0.01362	741.72	779.398	527.979	494.462
Oca2	20.5118	0.245737	-2.02481	1.00712	0.00161324	0.0136429	39.092	32.177	3.51986	7.25816
Trmu	398.505	0.6577	-0.604498	0.224831	0.00161453	0.013646	551.403	435.283	309.748	297.585
Morc4	740.545	0.679436	-0.55759	0.203305	0.00161772	0.0136652	766.409	1036.81	533.846	625.109
Dcbld2	1197.73	1.41825	0.504111	0.179829	0.00163919	0.0138386	831.22	1098.49	1511.19	1350.02
Hilpda	986.52	0.704461	-0.505408	0.180821	0.00164248	0.0138585	1250.94	1105.64	888.178	701.32
Nedd4	33070.6	0.772566	-0.372271	0.124953	0.00164913	0.0139066	36778.4	38431	26976.2	30096.9
St7	471.555	1.45978	0.545752	0.198255	0.00165063	0.0139114	378.575	364.673	571.391	571.58
Gpsm3	83.8086	2.0577	1.04103	0.453245	0.00166488	0.0140235	56.5806	40.2212	103.249	135.183
Slc35e3	483.716	0.687014	-0.541589	0.197053	0.0016694	0.0140536	576.093	595.274	374.279	389.219
Slc18a1	44.9459	2.49501	1.31904	0.613876	0.00167591	0.0141003	22.6322	19.6637	62.1842	75.3034
Kdm6a	802.754	1.40836	0.494016	0.175887	0.00168145	0.0141389	602.84	698.062	925.724	984.388
Smad3	2250.13	0.727311	-0.459356	0.161633	0.00168367	0.0141495	2377.41	2912.02	1694.23	2016.86
Arl2	1207.55	1.37549	0.459945	0.161688	0.00168593	0.0141605	1077.09	915.257	1436.1	1401.73
Rnase4	808.536	1.43415	0.520196	0.186747	0.0016889	0.0141765	672.794	621.195	854.153	1086
Hist1h4i	52.9854	0.396267	-1.33546	0.632872	0.00168975	0.0141765	102.874	59.885	32.852	16.3309
Hs3st5	56.3158	0.395702	-1.33751	0.627615	0.00170086	0.0142535	63.7817	109.938	15.2527	36.2908
Ido1	118.587	1.86469	0.898937	0.375909	0.00170035	0.0142535	86.4139	64.354	146.661	176.918
Nln	1208.95	1.3722	0.456494	0.16052	0.00171641	0.0143757	948.496	1048.43	1500.63	1338.22
Cd2bp2	1920.5	0.750243	-0.41457	0.143794	0.00172563	0.0144447	2321.86	2120.11	1641.43	1598.61
Spred1	2305.38	1.34144	0.423777	0.147279	0.00172922	0.0144666	2079.08	1794.76	2565.98	2781.69
Cav2	7128.64	1.40659	0.492197	0.176136	0.00173125	0.0144754	6895.63	4662.98	9055.43	7900.51
Mid2	277.419	1.55495	0.636867	0.241816	0.00173393	0.0144896	205.747	209.15	347.293	347.485
Zfp26	754.583	0.708948	-0.496248	0.177981	0.0017359	0.0144979	963.927	833.921	617.149	603.335
Lig1	3062.74	1.33689	0.418876	0.144174	0.00174152	0.0145299	2508.06	2656.39	3836.65	3249.84
Hspbap1	435.649	0.673199	-0.570896	0.211301	0.00174218	0.0145299	528.771	538.071	307.401	368.352
Pik3ap1	246.967	0.619318	-0.691248	0.268941	0.00174268	0.0145299	293.19	337.858	157.22	199.599
Clca3a2	11.5083	0.0936949	-3.41589	1.55395	0.00174742	0.0145554	23.661	20.5575	0	1.81454
Zfp821	347.292	0.663166	-0.592559	0.221477	0.00174771	0.0145554	432.07	424.558	263.99	268.552
Mcat	1553.01	0.722911	-0.468111	0.1661	0.0017545	0.0146037	1990.61	1673.2	1159.21	1389.03
Atp6v1h	2648.1	1.31482	0.39487	0.135962	0.00175703	0.0146165	2269.39	2242.56	3140.89	2939.56
Strip1	2213.12	0.743825	-0.426964	0.148722	0.00176266	0.0146552	2474.11	2664.43	2002.8	1711.11
Mreg	91.1265	2.02607	1.01869	0.444611	0.00176491	0.0146656	39.092	67.0354	123.195	135.183
Ubn2	1355.97	1.34788	0.430691	0.150486	0.00176818	0.0146845	1170.7	1099.38	1565.17	1588.63
Lrrc26	147.694	0.563318	-0.82798	0.340691	0.00177673	0.0147472	207.805	187.699	80.9568	114.316
Smim1	432.732	1.50717	0.591843	0.221585	0.00179839	0.0149187	360.058	304.788	476.355	589.726
Ptprk	1825.84	0.713763	-0.486484	0.174692	0.00181174	0.015021	1859.96	2475.84	1368.05	1599.52
Btg3	277.932	0.642546	-0.638129	0.244647	0.0018217	0.0150951	356.972	339.646	218.231	196.878
Gfpt1	3897.36	1.35385	0.437069	0.153713	0.00183362	0.0151807	2934.99	3567.18	4149.92	4937.37
Insr	782.665	1.4085	0.494163	0.178013	0.00183408	0.0151807	581.237	685.549	953.882	909.992
Timmdc1	877.251	0.688923	-0.537586	0.197536	0.00183608	0.0151887	1117.21	1006.43	576.084	809.285
Atp13a3	4909.47	1.30546	0.384556	0.133866	0.00183825	0.0151982	4453.4	3939.89	5481.6	5762.98
Spop	1726.48	1.36004	0.44365	0.156661	0.0018402	0.0152058	1397.03	1472.1	2210.47	1826.34
Lgals2	27228.5	1.38515	0.470042	0.16787	0.00184571	0.0152428	22331.8	22319.2	25955.5	38307.7
Trim46	723.407	0.70708	-0.500055	0.181043	0.00185176	0.0152587	801.386	925.089	562.005	605.149
Igf1r	603.3	0.691143	-0.532943	0.197764	0.00184965	0.0152587	673.823	784.761	520.939	433.675
Gm36026	115.77	0.54676	-0.87102	0.364425	0.00185141	0.0152587	162.541	151.053	75.0904	74.3962
Zdhhc23	6.60665	0.861662	-0.214806	0.461727	0.00185141	0.0152587	17.4885	8.93806	0	0
Crb2	35.7599	2.81485	1.49306	0.733727	0.00186605	0.0153423	9.25864	19.6637	55.1445	58.9726
Parvaos	15.2637	0.195698	-2.3533	1.21564	0.00186504	0.0153423	24.6897	30.3894	2.34657	3.62908
Tmem161b	520.899	1.43931	0.525376	0.191869	0.00186305	0.0153423	424.869	404.894	624.189	629.646
Phf5a	1322.93	0.740526	-0.433378	0.152557	0.00186507	0.0153423	1548.25	1531.98	1154.51	1056.97
Ralgps2	1528.83	0.738812	-0.436722	0.154134	0.00187483	0.0153803	1692.27	1873.42	1201.45	1348.2
Ahcy	5647.99	1.32617	0.407269	0.141909	0.00187414	0.0153803	5136.49	4427.02	6966.98	6061.47
Timm8b	2439.29	1.37077	0.454989	0.161619	0.00187311	0.0153803	2212.81	1818.89	3139.72	2585.72
Ccl7	19.5916	0.249388	-2.00353	1.04706	0.00187363	0.0153803	41.1495	26.8142	5.86644	4.53635
Tslrn1	6.36279	1.15451	0.207282	0.454535	0.001877	0.0153865	0	0	8.21301	17.2381
Nipal2	6.56024	0.861993	-0.214252	0.461163	0.00187767	0.0153865	9.25864	16.9823	0	0
Anxa13	13449.2	1.39684	0.482164	0.172367	0.00188573	0.015444	10587.8	11356.7	12780.6	19071.7
Aqp1	11586.2	1.30522	0.384297	0.132913	0.00188684	0.0154445	10118.7	9718.35	14310.6	12197.3
Lurap1	46.5945	0.411534	-1.28092	0.611295	0.00188954	0.0154581	79.2128	62.5664	24.639	19.9599
Rassf1	384.701	0.65662	-0.60687	0.230817	0.0018908	0.0154598	446.472	506.788	329.694	255.85
H6pd	5273.92	1.29619	0.37428	0.130614	0.00189538	0.0154887	4484.27	4571.82	5706.87	6332.75
Chmp7	1605.38	0.735996	-0.44223	0.156741	0.00189906	0.0155022	2038.96	1712.53	1376.27	1293.77
Vezf1	2113.2	1.32725	0.408441	0.142688	0.00189913	0.0155022	1712.85	1862.69	2355.96	2521.3
Gpx1	2801.76	0.754905	-0.405633	0.141832	0.0019061	0.0155506	3410.26	3050.56	2486.2	2260.01
Znf41-ps	181.126	1.77852	0.830675	0.347044	0.00191653	0.015627	150.196	89.3806	278.069	206.858
Proc	304.133	1.62379	0.699367	0.276833	0.00193858	0.0157981	240.725	197.531	307.401	470.873
Slc35f2	6.24167	1.15577	0.208859	0.455882	0.00194016	0.0158023	0	0	14.0794	10.8872
Snrnp25	764.729	1.41019	0.495893	0.180213	0.00194684	0.0158454	673.823	563.097	929.243	892.754
Mpp7	274.578	1.60305	0.680816	0.267613	0.0019476	0.0158454	207.805	192.168	290.975	407.364
Tbc1d2b	2171.49	1.35976	0.443357	0.157424	0.00195025	0.0158582	1744.74	1866.27	2251.54	2823.43
Cyb5a	10545.5	1.30589	0.385028	0.133976	0.0019565	0.0159003	9463.35	8579.64	11228.4	12910.5
Zfp979	828.75	1.52223	0.606189	0.231151	0.00196035	0.0159213	795.214	465.673	1060.65	993.461
Rpl14-ps1	60.8084	0.449149	-1.15473	0.53802	0.00196123	0.0159213	72.0116	107.257	34.0253	29.9399
Paip1	1933.48	0.7558	-0.403923	0.141558	0.00196897	0.0159753	2171.66	2284.57	1607.4	1670.28
Pcna	10342.6	1.34731	0.430087	0.152092	0.00197068	0.0159804	8587.9	8721.75	13745.1	10315.7
Perp	1975.63	1.3299	0.411322	0.14446	0.00197893	0.0160385	1597.63	1740.24	2197.57	2367.07
Nfya	2033.24	0.738787	-0.43677	0.155022	0.00198145	0.0160502	2493.66	2247.03	1852.62	1539.64
Eif2s3y	610.776	0.699684	-0.515225	0.18981	0.00200009	0.0161923	786.984	679.292	506.86	469.966
Arhgef16	991.907	1.39503	0.480292	0.17381	0.00202058	0.0163492	801.386	816.938	1050.09	1299.21
Amotl1	277.663	1.55128	0.633463	0.245481	0.00202585	0.0163829	199.575	215.407	367.239	328.432
Rasl11b	122.587	0.554116	-0.851741	0.362451	0.0020296	0.0164043	176.943	153.735	87.9965	71.6744
Mrpl10	1531.78	1.33948	0.421678	0.149102	0.00203131	0.0164092	1294.15	1280.82	1689.53	1862.63
4931414P19Rik	371.74	0.672876	-0.571587	0.21626	0.00204755	0.0165313	455.731	454.947	296.842	279.439
Sdc3	35.5653	2.66611	1.41474	0.702725	0.00205061	0.016547	14.4023	16.0885	52.7979	58.9726
Tdrd7	713.291	1.40779	0.493428	0.180156	0.00205397	0.016565	535.972	618.513	829.514	869.165
Ubald2	1119.57	0.721099	-0.471731	0.170749	0.00205519	0.0165658	1362.05	1284.4	816.608	1015.24
Crebl2	1088.33	1.36453	0.448406	0.160616	0.00205875	0.0165764	948.496	856.266	1236.64	1311.91
Tmem8	996.44	1.41695	0.50279	0.184233	0.00205768	0.0165764	832.249	774.036	1023.11	1356.37
Sipa1l2	303.257	0.635185	-0.654752	0.257606	0.002072	0.0166741	338.455	426.345	252.257	195.97
Pfkfb3	323.407	0.652445	-0.616072	0.238161	0.00207953	0.0166932	361.087	444.221	237.004	251.314
Agbl3	245.437	1.57527	0.655601	0.257589	0.00207809	0.0166932	192.374	169.823	315.614	303.936
Tpk1	936.04	1.5021	0.58698	0.223567	0.00208002	0.0166932	697.484	741.859	865.886	1438.93
Nudcd3	3079.86	1.32643	0.407554	0.144135	0.00207615	0.0166932	2691.18	2517.85	3846.04	3264.36
Rnf14	2068.64	1.32476	0.405731	0.142987	0.0020787	0.0166932	1777.66	1725.94	2507.31	2263.64
Meis1	165.916	0.59661	-0.745139	0.304917	0.00208932	0.0167587	208.834	223.451	116.155	115.223
Ogdh	2524.42	1.35075	0.433756	0.154622	0.00209047	0.0167589	1940.2	2276.52	2689.17	3191.78
Rap2c	1261.92	1.38296	0.467761	0.169266	0.00209505	0.0167865	1157.33	914.363	1457.22	1518.77
Eps8l2	961.767	1.374	0.458379	0.165257	0.0021017	0.0168306	760.237	825.876	1080.6	1180.36
Ttc38	255.711	1.56341	0.644692	0.252454	0.00211057	0.0168925	183.115	196.637	307.401	335.69
Casp2	2038.6	1.32157	0.40225	0.141807	0.00211219	0.0168964	1802.35	1657.12	2316.07	2378.86
Orai1	400.513	0.651427	-0.618324	0.239773	0.00211667	0.0169231	432.07	566.673	263.99	339.319
P2ry2	172.171	0.593587	-0.752469	0.310031	0.00211968	0.016938	230.437	218.982	134.928	104.336
mt-Nd2	31026.9	1.30334	0.382219	0.133388	0.00213048	0.0170151	28301.6	24889.8	33102	37814.1
Tmem120a	898.1	1.41123	0.49695	0.182642	0.00213852	0.0170701	702.628	747.221	1202.62	939.932
Gbe1	776.173	0.706301	-0.501645	0.184953	0.00214124	0.0170826	926.892	928.664	551.445	697.691
D6Ertd527e	29.2929	2.94688	1.55919	0.806582	0.00214585	0.0171101	13.3736	8.93806	42.2383	52.6217
Shpk	133.4	1.81338	0.858683	0.368313	0.00214918	0.0171274	85.3852	87.5929	141.968	218.652
Gar1	1065.79	0.732552	-0.448997	0.161998	0.00215315	0.0171498	1259.17	1237.92	938.63	827.431
Tbc1d20	2459.19	1.31262	0.392445	0.138244	0.00215522	0.0171571	2032.78	2158.54	2910.93	2734.51
Mfsd14b	941.103	1.39549	0.480767	0.175716	0.00216736	0.0172445	844.593	689.124	1159.21	1071.49
Tspan2	617.241	1.41877	0.504638	0.186418	0.00217044	0.0172597	484.535	508.575	691.066	784.789
Dnajc3	1027.53	1.3741	0.45849	0.166047	0.00217805	0.0173109	786.984	906.319	1251.9	1164.94
Dnajc5	3713.36	1.30907	0.388539	0.136243	0.00219408	0.0174196	2979.22	3366.97	4344.68	4162.56
Pigs	1464.89	1.34723	0.429992	0.153825	0.00219371	0.0174196	1147.04	1304.06	1651.99	1756.48
Akap10	810.528	1.3778	0.462361	0.167913	0.00220269	0.0174786	675.88	657.841	942.15	966.243
C1ra	555.391	1.50607	0.590792	0.227204	0.00220623	0.0174973	385.777	465.673	560.831	809.285
Lyz2	90.2014	1.90581	0.930404	0.412647	0.00221828	0.0175834	55.5518	55.4159	125.542	124.296
Ntmt1	1090.84	0.691133	-0.532966	0.200399	0.00222025	0.0175896	1568.82	1068.1	919.857	806.563
Ccdc120	313.543	1.51645	0.600697	0.232438	0.00222506	0.0176088	225.293	252.053	393.051	383.775
Spdl1	628.655	1.44762	0.533682	0.20045	0.00222501	0.0176088	456.759	537.177	844.767	675.916
Shcbp1	732.116	1.43707	0.523135	0.195468	0.00223264	0.0176433	511.282	653.372	952.709	811.1
Lyst	492.102	1.46302	0.548946	0.207556	0.002233	0.0176433	400.179	372.717	535.019	660.493
Scin	11.4612	7.13906	2.83573	1.49777	0.00223101	0.0176433	2.05747	0.893806	21.1192	21.7745
Tha1	40.9563	2.53085	1.33962	0.673604	0.00223736	0.0176683	23.661	13.4071	66.8774	59.8798
Crlf3	1260.74	1.35835	0.44185	0.159465	0.00224375	0.0177093	1039.02	1056.48	1587.46	1360
Eif3l	4610.13	0.747247	-0.420342	0.150324	0.00224875	0.0177393	4770.26	5920.57	3632.5	4117.19
Arhgap12	1253.41	1.35622	0.439591	0.158557	0.00225383	0.0177699	967.013	1119.04	1447.84	1479.76
Zfp553	865.464	0.724272	-0.465396	0.170155	0.00225644	0.017781	999.933	1040.39	755.597	665.936
Bche	239.763	1.63237	0.706971	0.287085	0.00226415	0.0178228	167.684	175.186	248.737	367.444
Hoxb5	6.24826	0.867044	-0.205823	0.452606	0.00226332	0.0178228	13.3736	11.6195	0	0
Hus1	686.782	1.41912	0.505	0.187603	0.00226631	0.0178303	603.869	500.531	858.846	783.882
Amer1	258.965	1.5609	0.642377	0.254236	0.00228232	0.0179467	176.943	207.363	336.733	314.823
Bhlhe40	1360.32	1.41274	0.498501	0.184659	0.00228478	0.0179565	939.237	1255.8	1460.74	1785.51
Bpgm	1174.38	0.733872	-0.446399	0.162106	0.0022902	0.0179801	1376.45	1372.89	1053.61	894.569
Parp14	254.299	0.640814	-0.642023	0.254596	0.00229012	0.0179801	320.966	319.089	174.82	202.321
2022-03-03	54.4157	2.35892	1.23813	0.612243	0.00229713	0.0180248	28.8046	24.1327	110.289	54.4362
Pisd-ps1	268.93	0.62091	-0.687545	0.279047	0.00230755	0.018097	412.524	275.292	198.286	189.62
Crybb1	6.21453	0.867752	-0.204645	0.451468	0.00231406	0.0181289	12.3448	12.5133	0	0
Kidins220	1271.81	1.40394	0.48948	0.181172	0.00231314	0.0181289	878.542	1182.5	1418.5	1607.68
Fchsd2	661.505	0.691148	-0.532933	0.201302	0.00231597	0.0181342	767.438	833.027	445.849	599.706
Ccdc124	964.13	0.730411	-0.453219	0.165359	0.0023265	0.018207	1064.74	1198.59	808.395	784.789
Pgd	5914.31	1.27892	0.354922	0.125997	0.00234959	0.0183746	4980.12	5263.62	6760.48	6653.01
Lactb	264.769	1.55648	0.638292	0.253238	0.0023504	0.0183746	206.776	187.699	306.228	358.372
Cenpx	952.214	1.41552	0.501331	0.187101	0.00237731	0.0185752	871.341	663.204	1059.48	1214.84
Rpf2	787.843	0.725287	-0.463376	0.170311	0.00237928	0.0185808	949.525	907.213	664.081	630.553
1110012L19Rik	461.363	1.46007	0.546041	0.208235	0.00239344	0.0186815	395.035	329.814	580.777	539.826
Insig1	4436.78	1.4127	0.49846	0.186062	0.00241068	0.0187962	3352.66	3804.04	4156.96	6433.45
Hibadh	3868.79	1.32774	0.408977	0.146897	0.00241044	0.0187962	3371.17	3168.54	4004.43	4931.01
Cdipt	2687.02	1.30308	0.381925	0.135868	0.00244995	0.0190923	2215.9	2386.46	3064.63	3081.09
Gsdmd	7448.94	0.74762	-0.419624	0.152119	0.00245487	0.0191206	9842.96	7439.14	6209.04	6304.62
Plin3	7094.89	1.35961	0.443189	0.161195	0.00245765	0.0191322	6427.55	5365.51	7141.8	9444.68
Gba	652.999	1.44073	0.526796	0.200221	0.0025053	0.0194928	469.104	567.567	701.626	873.701
Epn1	1890.76	1.34491	0.42751	0.155374	0.00250941	0.0195145	1492.7	1673.2	2011.01	2386.12
Phf21a	807.874	0.722249	-0.469431	0.174152	0.00251579	0.0195307	943.352	966.204	612.456	709.485
Rasal1	17.4726	0.244113	-2.03438	1.17892	0.00251806	0.0195307	38.0633	23.2389	5.86644	2.72181
Fuz	119.483	1.81138	0.857092	0.379073	0.00251572	0.0195307	92.5864	61.6726	163.087	160.587
Coprs	751.72	1.43163	0.517662	0.196192	0.00251809	0.0195307	689.254	510.363	936.283	870.98
Ccdc86	741.418	0.721679	-0.47057	0.174638	0.00251417	0.0195307	839.45	912.575	623.015	590.633
Ssr4	4448.5	1.3202	0.400754	0.144178	0.00253395	0.0196278	4124.21	3425.06	5365.44	4879.3
Mab21l3	548.006	0.684702	-0.546453	0.21249	0.00253459	0.0196278	713.944	622.089	366.066	489.926
Ddx52	1558.64	1.34047	0.422736	0.153557	0.0025328	0.0196278	1209.8	1405.06	1851.45	1768.27
Cyp4f17	46.204	2.32197	1.21535	0.608992	0.0025448	0.0196965	19.546	25.9204	70.3972	68.9525
Acacb	33.2695	0.372325	-1.42537	0.757981	0.00255054	0.0197306	62.753	42.9027	12.9062	14.5163
Ralgds	308.651	0.655774	-0.608728	0.241602	0.0025624	0.0198121	372.403	395.956	207.672	258.572
Mknk2	3110.47	1.33089	0.412391	0.149444	0.00258197	0.019953	2530.69	2717.17	3226.54	3967.49
Tmbim6	12935.6	1.3368	0.418781	0.152247	0.00258527	0.019968	9871.76	11877.8	13287.5	16705.6
Pcdhb22	61.7053	0.473272	-1.07926	0.524577	0.00259029	0.0199963	99.7875	79.5487	37.5452	29.9399
Otud5	1796.08	1.31913	0.399588	0.143884	0.00261133	0.0201483	1471.09	1579.35	2026.27	2107.59
Apoo	341.151	1.49251	0.577738	0.22646	0.00261665	0.0201741	264.385	260.991	448.196	391.034
Tmbim4	1401.12	1.38988	0.474964	0.177408	0.00261741	0.0201741	1021.54	1265.63	1470.13	1847.2
Zkscan16	6.16327	1.13511	0.182837	0.432723	0.00261942	0.0201791	0	0	4.69315	19.9599
Triobp	1216.07	0.7435	-0.427595	0.156623	0.00263321	0.0202748	1449.49	1380.93	963.269	1070.58
Gm8994	17.3248	3.95284	1.98289	1.15422	0.00263831	0.0203034	6.17242	2.68142	30.5055	29.9399
Ppbp	27.6044	0.338039	-1.56474	0.86497	0.00265267	0.0204034	55.5518	34.8584	8.21301	11.7945
Tbc1d25	292.055	1.52676	0.610477	0.2436	0.00266482	0.0204797	199.575	241.327	370.759	356.557
Akr1c13	6194.19	1.28093	0.357188	0.128394	0.00266537	0.0204797	5506.83	5210.89	7310.75	6748.28
Slc37a4	942.171	0.730117	-0.453799	0.168482	0.00267321	0.0205293	1130.58	1084.19	719.225	834.689
Lyn	505.389	0.699158	-0.516309	0.199206	0.00268035	0.0205735	574.035	642.646	424.73	380.146
Pxmp4	383.14	1.5467	0.62919	0.253471	0.00268618	0.0206075	272.615	300.319	378.972	580.653
Jkamp	500.022	0.686269	-0.543154	0.210592	0.00269754	0.0206839	667.651	547.903	359.026	425.51
Clec2f	5.81534	1.14138	0.190775	0.43902	0.00270562	0.0207351	0	0	10.5596	12.7018
Kdm3a	2081.43	1.33959	0.421795	0.154529	0.00272133	0.0208341	1635.69	1856.43	2623.47	2210.11
Tpp1	1728.12	1.3493	0.432211	0.159254	0.00272135	0.0208341	1329.13	1555.22	1856.14	2172.01
Ankfy1	2364.15	1.32567	0.406726	0.148005	0.00272934	0.0208845	1820.87	2177.31	2690.35	2768.08
Nrp2	1917.86	0.696505	-0.521795	0.200886	0.00273615	0.0209258	2222.07	2398.97	1885.47	1164.94
Nipsnap3b	538.169	1.41776	0.503616	0.191738	0.00274072	0.0209467	454.702	410.257	633.575	654.142
St13	4958.11	0.778534	-0.361168	0.129308	0.00274172	0.0209467	5388.53	5869.62	4308.31	4265.99
9330102E08Rik	25.1761	2.99804	1.58402	0.886212	0.00277684	0.021204	8.2299	9.83186	36.3719	46.2708
Guca2a	32.0416	2.67401	1.419	0.768453	0.00277964	0.0212145	10.2874	16.0885	52.7979	48.9926
Cdx2	1013.98	0.705796	-0.502676	0.191652	0.00279647	0.0213319	1115.15	1312.11	688.72	939.932
Zscan12	218.719	0.631623	-0.662865	0.273883	0.00279888	0.0213393	292.161	263.673	146.661	172.381
Got2	3685.73	1.31384	0.393794	0.142225	0.00280833	0.0214003	2858.86	3420.59	4283.67	4179.79
1810030O07Rik	682.851	1.40547	0.491051	0.186451	0.00281671	0.0214531	532.886	572.036	739.171	887.31
Tor1b	1434.29	0.743693	-0.427221	0.157888	0.00282098	0.0214697	1763.26	1573.99	1281.23	1118.66
Sh3kbp1	662.514	0.680388	-0.55557	0.218032	0.00282179	0.0214697	711.886	906.319	429.423	602.428
Ccn1	1752.04	0.297942	-1.74689	1.11898	0.00283285	0.0215317	1234.48	4736.28	533.846	503.535
Fam219a	102.916	1.84802	0.885978	0.406359	0.00283271	0.0215317	73.0404	56.3097	160.74	121.574
Dip2c	10.6482	0.111436	-3.16571	1.66713	0.0028761	0.0218438	24.6897	16.0885	0	1.81454
Gm5165	264.29	0.654847	-0.61077	0.24704	0.00287686	0.0218438	334.34	324.451	192.419	205.95
Selenot	4181.93	0.753381	-0.408548	0.150115	0.00288334	0.0218818	5402.93	4262.56	3633.67	3428.57
Pbld2	94.487	1.88264	0.912759	0.424213	0.00288741	0.0219014	65.8392	50.9469	111.462	149.7
Abca3	1694.76	1.39757	0.482921	0.183493	0.00290491	0.0220228	1313.7	1439.92	1651.99	2373.42
Nxf1	1631.1	1.34992	0.432875	0.160856	0.00290737	0.0220302	1223.17	1496.23	2000.45	1804.56
Clic3	198.668	1.673	0.74244	0.320033	0.00291117	0.0220476	135.793	140.327	198.286	320.266
Comt	1919.12	0.749775	-0.415471	0.153433	0.00291816	0.0220893	2418.56	2029.83	1548.74	1679.36
Pbdc1	631.208	1.40433	0.489879	0.186943	0.00292857	0.0221568	519.512	501.425	810.741	693.155
Rbm15b	1772.54	0.75666	-0.402282	0.147637	0.00294755	0.022289	1955.63	2131.73	1431.41	1571.39
Plcb1	90.2204	0.453008	-1.14239	0.585369	0.0029539	0.0223144	141.966	126.92	17.5993	74.3962
Rxylt1	862.277	1.36128	0.44496	0.166471	0.00295393	0.0223144	687.197	741.859	998.467	1021.59
Tnfrsf11a	106.295	0.551387	-0.858862	0.39272	0.00296131	0.0223587	136.822	152.841	57.4911	78.0253
Dnajc13	2145.27	1.32157	0.402256	0.147653	0.00296392	0.022367	1681.99	1952.97	2387.64	2558.5
Cnksr1	92.8204	1.87756	0.908859	0.423809	0.0029678	0.0223849	57.6093	57.2036	106.769	149.7
Il17ra	466.967	1.44095	0.52702	0.20508	0.00297474	0.0224144	338.455	401.319	553.792	574.302
Donson	496.479	1.44976	0.535818	0.209504	0.00297403	0.0224144	341.541	440.646	611.283	592.448
Ctsd	7345.3	1.27264	0.347819	0.124983	0.00298774	0.0225009	6592.15	6191.39	8195.41	8402.23
Acy3	402.065	1.46846	0.554304	0.218928	0.0029979	0.0225659	299.363	328.027	444.676	536.197
Sprr2e	6.26094	0.882553	-0.180245	0.430371	0.00300859	0.0226348	20.5747	4.46903	0	0
Sh3rf2	286.16	1.51998	0.604052	0.244951	0.00302173	0.0227221	199.575	233.283	374.279	337.505
Atp5j	2425.28	1.31171	0.391446	0.143391	0.00302406	0.0227281	2031.76	2100.44	2589.44	2979.48
Itpr3	4044.89	1.30313	0.38198	0.139417	0.00303027	0.0227632	3247.72	3675.33	4368.15	4888.37
Nkiras2	1635.45	1.32362	0.404492	0.149271	0.00303971	0.0228225	1429.94	1338.03	1786.92	1986.92
Uros	381.946	0.676256	-0.564358	0.224941	0.00304397	0.0228429	510.254	426.345	274.549	316.637
2610316D01Rik	31.9854	2.84079	1.50629	0.862632	0.00305847	0.0229401	5.14369	18.7699	58.6644	45.3635
Znhit6	676.57	0.708341	-0.497484	0.192775	0.0030659	0.0229841	748.921	867.885	599.55	489.926
Smt3h2-ps	9.64981	0.709127	-0.495883	1.44788	0.00308677	0.0231172	21.6035	16.0885	0	0.90727
Gtpbp2	1587.67	1.32221	0.402948	0.148525	0.00308553	0.0231172	1271.52	1417.58	1827.98	1833.59
Ubl3	2421.17	1.29811	0.376415	0.137433	0.00309255	0.0231487	2023.53	2130.83	2839.35	2690.96
2210011C24Rik	49.2767	2.27666	1.18692	0.622278	0.00309821	0.0231794	16.4598	32.177	78.6102	69.8598
Tmem199	1448.42	1.34009	0.422335	0.1574	0.00310691	0.0232327	1287.98	1140.5	1789.26	1575.93
Smoc1	81.7745	1.90315	0.928388	0.442349	0.00311936	0.023314	55.5518	43.7965	116.155	111.594
Ube2e3	2017.16	0.747902	-0.41908	0.156392	0.0031231	0.0233302	2586.25	2096.87	1630.87	1754.66
Zfp574	466.713	0.688031	-0.539454	0.213196	0.00313079	0.0233758	513.34	620.301	336.733	396.477
Polr1a	2171.01	1.37751	0.462067	0.175481	0.00314172	0.0234456	1521.5	2042.35	2811.2	2309
Tent4b	839.627	1.37677	0.461287	0.175366	0.00314707	0.0234737	654.277	723.982	1063	917.25
Wdr82	2744.66	0.775037	-0.367663	0.134303	0.00315449	0.0235172	3040.95	3208.76	2370.04	2358.9
Glipr1	443.525	0.69622	-0.522385	0.205058	0.00317679	0.0236715	535.972	533.602	374.279	330.246
Ubr4	3112.34	1.36484	0.448733	0.169715	0.00319067	0.023763	2174.75	2971.9	3369.68	3933.02
Bahcc1	871.673	0.736497	-0.441248	0.166757	0.00319457	0.02378	994.789	1044.86	752.077	694.969
Rgs11	201.781	0.618363	-0.693474	0.298707	0.00322382	0.0239857	272.615	245.797	168.953	119.76
Fut10	371.443	1.48538	0.570835	0.229948	0.00322878	0.024006	249.983	322.664	474.008	439.119
Nfil3	405.173	0.636595	-0.651553	0.274542	0.00322979	0.024006	371.374	654.266	315.614	279.439
Vasn	305.952	0.66549	-0.58751	0.239278	0.00323569	0.0240377	344.627	412.044	227.618	239.519
Fbxo17	55.0716	2.10521	1.07396	0.548613	0.00324737	0.0241002	31.8909	27.708	84.4767	76.2107
Poglut1	1548.84	0.757695	-0.400312	0.14874	0.00324601	0.0241002	1872.3	1698.23	1292.96	1331.87
Ndufb2	719.584	1.4068	0.492417	0.190929	0.00325084	0.0241139	656.334	505.894	862.366	853.741
Avpi1	3512.32	1.32882	0.410147	0.153125	0.00325662	0.0241447	3333.11	2591.14	4147.57	3977.47
C1rb	11.5422	6.79828	2.76517	1.68142	0.00326894	0.0242239	0	2.68142	11.7329	31.7545
Ddx19b	902.371	1.35357	0.436765	0.165012	0.00327678	0.0242699	773.61	727.558	1087.64	1020.68
Slc4a5	5.76763	0.879405	-0.1854	0.434156	0.00330454	0.0244632	12.3448	10.7257	0	0
Emd	1516.22	1.31754	0.397849	0.147806	0.0033063	0.0244639	1233.46	1339.81	1750.54	1741.05
[truncated: 21,613 more rows]

## Sheet: DEG sgUsp15 FDR 0.05 log2 FC
Gene	baseMean	Fold_Change	log2FoldChange	lfcSE	pvalue	padj	...sgLUC_1_S1.sorted.bam	...sgLUC_2_S2.sorted.bam	...sgUSP15_1_S3.sorted.bam	...sgUSP15_2_S4.sorted.bam
Hist1h2bm	154.899	2412.5	11.2363	2.98174	2.52554e-13	1.91565e-11	0	0	323.827	295.77
Asb17	120.011	1797.59	10.8119	2.9424	1.98104e-12	1.33797e-10	0	0	240.524	239.519
Msh4	2215.64	748.24	9.54736	1.0529	8.93707e-21	1.39145e-18	1.02874	8.93806	4579.34	4273.24
Asb17os	85.9983	254.863	7.99358	1.33193	8.40264e-09	3.04618e-07	1.02874	0	204.152	138.812
Htatip2	253.256	163.27	7.35112	0.625317	1.50756e-31	5.18566e-29	2.05747	3.57522	525.633	481.761
Zfp947	17.1254	157.225	7.29669	2.71912	4.59474e-06	9.04937e-05	0	0	34.0253	34.4763
Smagp	219.059	140.644	7.13591	0.634945	4.45475e-29	1.3178e-26	2.05747	3.57522	382.492	488.111
Abcc2	110.621	132.33	7.04799	0.882249	2.3697e-15	2.33668e-13	0	2.68142	163.087	276.717
Ms4a4d	455.165	121.761	6.92791	0.430383	2.4808e-58	3.66935e-55	5.14369	8.93806	773.196	1033.38
Gsta3	1713.38	66.0768	6.04607	0.219142	2.43742e-168	3.60519e-164	46.2932	54.5221	2956.68	3796.02
Fgb	67.5015	58.896	5.8801	0.832754	6.00461e-13	4.31137e-11	3.08621	0.893806	100.903	165.123
AU018091	8.41604	48.5215	5.60055	2.845	0.000394317	0.00428534	0	0	16.426	17.2381
Wnt4	31.3263	47.1185	5.55822	1.15435	5.69114e-07	1.40296e-05	0	1.78761	44.5849	78.9325
Ms4a4b	17.6213	39.2294	5.29387	1.52659	0.000154922	0.00195683	1.02874	0	42.2383	27.2181
Ksr2	54.2245	36.9984	5.20939	0.806549	1.82075e-11	1.08156e-09	4.11495	0.893806	130.235	81.6543
Serpinb6c	158.209	36.201	5.17796	0.47184	1.13267e-28	3.22179e-26	3.08621	12.5133	341.427	275.81
Krt4	15.517	32.8064	5.0359	1.57663	0.000314036	0.00353235	1.02874	0	21.1192	39.9199
Nckap5	77.6204	30.8743	4.94833	0.670051	1.67939e-14	1.48741e-12	6.17242	2.68142	93.863	207.765
Gstt2	21.1085	27.9422	4.80438	1.23913	1.71177e-05	0.000282892	2.05747	0	35.1986	47.1781
Ppp1r9a	33.8512	27.193	4.76516	0.916334	3.16592e-08	1.02466e-06	2.05747	1.78761	68.0507	63.5089
Ugt2b1	19.2175	24.8202	4.63344	1.27533	4.08444e-05	0.000616459	1.02874	0.893806	50.4513	24.4963
Ppef1	237.733	23.1905	4.53546	0.339549	1.34094e-41	7.93354e-39	15.4311	22.3451	434.116	479.039
Ptprh	61.6069	22.2291	4.47437	0.656812	1.23153e-12	8.55192e-11	1.02874	8.04425	118.502	118.852
Xlr	725.824	21.2408	4.40877	0.238007	8.25259e-78	1.74377e-74	65.8392	62.5664	1622.66	1152.23
Gkn2	16.4928	20.7076	4.37209	1.32281	0.000121151	0.00159995	0	1.78761	26.9856	37.1981
Arhgef26	51.1037	19.653	4.29668	0.682827	3.09952e-11	1.74981e-09	5.14369	3.57522	86.8232	108.872
Cysltr1	35.3383	19.3495	4.27422	0.822225	2.19727e-08	7.30331e-07	2.05747	3.57522	70.3972	65.3235
Dhdh	30.3552	19.2109	4.26386	0.895558	2.04902e-07	5.63329e-06	2.05747	2.68142	50.4513	66.2307
Gpr55	110.987	18.5403	4.21259	0.508263	8.81356e-18	1.02647e-15	11.3161	9.83186	136.101	286.697
Ptgis	20.0312	18.5152	4.21064	1.13043	2.07987e-05	0.000336579	1.02874	1.78761	32.852	44.4562
Flrt2	34.7864	18.3122	4.19474	0.84477	5.72132e-08	1.77038e-06	5.14369	0.893806	66.8774	66.2307
G0s2	19.8043	18.2344	4.18859	1.13367	2.30665e-05	0.000370442	1.02874	1.78761	32.852	43.549
Cdh16	319.671	17.849	4.15777	0.300757	1.35412e-44	8.70818e-42	33.9483	32.177	502.167	710.393
Nlrp1b	19.7353	16.7341	4.06472	1.19626	5.05121e-05	0.000740461	3.08621	0	50.4513	25.4036
Mb21d2	52.3014	16.0773	4.00695	0.664811	1.20424e-10	6.14205e-09	8.2299	2.68142	110.289	88.0052
Pdzk1ip1	183.368	16.0673	4.00606	0.397931	5.81791e-25	1.30383e-22	18.5173	22.3451	241.697	450.913
Zfp704	214.218	15.9765	3.99788	0.363117	2.75085e-29	8.30364e-27	20.5747	27.708	305.055	503.535
Gm379	55.1365	15.8776	3.98892	0.637201	3.0908e-11	1.74981e-09	6.17242	5.36283	125.542	83.4689
Zdhhc15	107.573	15.8072	3.98251	0.451296	8.53665e-20	1.2379e-17	13.3736	10.7257	222.925	183.269
Ly6f	134.666	14.7164	3.87935	0.396273	9.54982e-24	1.98856e-21	17.4885	15.1947	242.87	263.108
Thnsl2	55.0617	14.6312	3.87098	0.637156	9.55783e-11	5.02958e-09	6.17242	6.25664	76.2637	131.554
Zfp78	16.5952	14.1395	3.82166	1.23297	0.000152616	0.00193615	0	2.68142	32.852	30.8472
Wfdc1	24.1046	14.0267	3.8101	0.962611	5.63838e-06	0.000108308	3.08621	1.78761	51.6246	39.9199
Gm37691	9.13233	13.8867	3.79563	1.90031	0.00363443	0.0264161	0	0.893806	21.1192	14.5163
Gimap8	9.5686	13.6705	3.773	1.9605	0.00367192	0.0266175	1.02874	0	8.21301	29.0327
Tln2	36.7502	13.3978	3.74392	0.748116	4.42768e-08	1.40235e-06	3.08621	5.36283	66.8774	71.6744
Rex2	26.8841	13.3975	3.74389	0.898213	2.1755e-06	4.70437e-05	4.11495	1.78761	48.1048	53.529
Wdfy4	12.9193	13.1711	3.7193	1.48081	0.000783882	0.00764199	2.05747	0	18.7726	30.8472
Fetub	52.9997	13.1191	3.7136	0.652295	9.81439e-10	4.15945e-08	2.05747	10.7257	90.3431	108.872
Zfp28	15.2561	12.4387	3.63677	1.24756	0.000248139	0.00292215	1.02874	1.78761	24.639	33.569
Nxf3	24.6615	11.4382	3.51579	0.96576	1.53153e-05	0.000258006	5.14369	0.893806	56.3178	36.2908
Ipcef1	77.7595	11.2809	3.49581	0.556686	2.18111e-11	1.26513e-09	10.2874	12.5133	86.8232	201.414
Mvb12b	276.459	11.1794	3.48277	0.278645	4.65422e-37	2.22066e-34	48.3507	40.2212	529.153	488.111
Nlrp4f	268.006	10.7218	3.42247	0.284752	1.87864e-34	7.7186e-32	42.1782	46.4779	539.712	443.655
Rora	112.104	10.6731	3.4159	0.408665	4.5467e-18	5.4234e-16	16.4598	19.6637	201.805	210.487
Fabp4	222.444	10.3045	3.36521	0.339141	1.79234e-24	3.89861e-22	49.3794	26.8142	339.08	474.502
Apoa1	55.247	10.2925	3.36352	0.663902	2.53546e-08	8.33379e-07	4.11495	12.5133	61.0109	143.349
Aldh1a7	206.074	10.1194	3.33906	0.30787	1.44134e-28	4.02244e-26	34.9771	36.646	362.546	390.126
Hydin	45.3401	10.0685	3.33178	0.650847	2.07621e-08	6.94778e-07	4.11495	9.83186	82.1301	85.2834
Slc4a1	35.3751	9.94587	3.3141	0.786928	1.46869e-06	3.29142e-05	5.14369	5.36283	37.5452	93.4488
Fut2	664.066	9.7659	3.28775	0.562624	2.51475e-10	1.18458e-08	95.6726	125.133	797.835	1637.62
Mfap5	18.4158	9.64908	3.27039	1.0689	0.000125335	0.00164639	2.05747	2.68142	39.8918	29.0327
Rapsn	7.92627	9.2691	3.21243	2.19957	0.00664871	0.0426457	1.02874	0	15.2527	15.4236
Ugt2b35	1612.82	8.59954	3.10426	0.17893	1.06767e-68	1.75466e-65	382.69	282.443	2723.2	3062.94
G730013B05Rik	17.1487	8.59928	3.10422	1.10906	0.000262454	0.00304946	2.05747	2.68142	37.5452	26.3108
Baiap2l2	46.9678	8.5331	3.09307	0.625462	4.66843e-08	1.46916e-06	7.20116	9.83186	69.2239	101.614
Ace2	35.629	8.32199	3.05693	0.768865	3.77656e-06	7.67295e-05	6.17242	6.25664	37.5452	92.5416
Avil	539.339	8.32052	3.05667	0.250697	2.24323e-35	9.4799e-33	86.4139	138.54	1104.06	828.338
Gstm2	1677.41	8.16387	3.02925	0.196197	5.65029e-55	6.42873e-52	325.081	395.956	2455.69	3532.91
Cyp2c65	100.684	7.99079	2.99834	0.421515	7.36695e-14	6.22655e-12	18.5173	23.2389	159.567	201.414
Bpifb4	59.5498	7.92014	2.98553	0.585483	1.7537e-08	5.94931e-07	17.4885	6.25664	125.542	88.9125
Nnmt	31.3639	7.84843	2.9724	0.764595	5.566e-06	0.000107336	5.14369	6.25664	66.8774	47.1781
Akr1c14	153.322	7.81545	2.96633	0.354109	3.28319e-18	3.98047e-16	37.0345	29.4956	234.657	312.101
Gm2381	14.0849	7.73528	2.95145	1.34355	0.00119769	0.010769	0	3.57522	24.639	28.1254
Ophn1	53.3022	7.54765	2.91603	0.574413	2.23532e-08	7.41313e-07	10.2874	11.6195	111.462	79.8398
Zfp980	9.94338	7.45804	2.8988	1.83043	0.00388673	0.0279207	2.05747	0	22.2925	15.4236
Ncald	171.999	7.1606	2.84008	0.353226	5.50478e-17	5.99172e-15	40.1208	40.2212	231.138	376.517
Slco1a6	9.74387	7.15906	2.83977	1.86315	0.00420361	0.0297491	2.05747	0	18.7726	18.1454
Scin	11.4612	7.13906	2.83573	1.49777	0.00223101	0.0176433	2.05747	0.893806	21.1192	21.7745
Clic5	17.2337	7.03533	2.81462	1.08124	0.000417887	0.00450837	3.08621	2.68142	30.5055	32.6617
Habp2	255.384	7.03312	2.81417	0.804356	1.8501e-05	0.000302039	29.8334	70.6106	305.055	616.037
Pax2	134.444	6.8755	2.78146	0.378946	1.25277e-14	1.12986e-12	37.0345	27.708	193.592	279.439
Wdr66	13.0848	6.8273	2.77132	1.3269	0.00146396	0.0126702	2.05747	1.78761	25.8123	22.6818
C1rb	11.5422	6.79828	2.76517	1.68142	0.00326894	0.0242239	0	2.68142	11.7329	31.7545
Dsel	32.6143	6.7772	2.76069	0.744968	1.05384e-05	0.000186675	9.25864	4.46903	58.6644	58.0653
Scnn1a	404.7	6.74747	2.75435	0.305363	1.13483e-20	1.74846e-18	96.7013	104.575	465.795	951.727
A930006K02Rik	9.63817	6.71952	2.74836	1.96566	0.00478314	0.0328905	2.05747	0	12.9062	23.589
Gm773	97.6336	6.6718	2.73808	0.420259	4.58502e-12	2.97443e-10	18.5173	28.6018	170.127	173.289
Slit3	16.4867	6.50155	2.70078	1.11293	0.000646065	0.00650507	3.08621	2.68142	29.3322	30.8472
Gm38124	78.1426	6.42894	2.68458	0.462828	3.77832e-10	1.74097e-08	22.6322	16.0885	131.408	142.441
Gc	56.2484	6.40772	2.67981	0.565186	1.18806e-07	3.42547e-06	13.3736	13.4071	73.9171	124.296
Ly6g2	811.21	6.26375	2.64703	0.189339	1.3304e-45	1.03568e-42	212.949	227.027	1270.67	1534.19
Gm21411	14.8969	6.26293	2.64684	1.26304	0.00130302	0.0114925	4.11495	0.893806	24.639	29.9399
Zhx1	251.633	6.25124	2.64414	0.27476	4.04027e-23	7.86311e-21	61.7242	72.3982	470.488	401.921
Arhgdib	74.8213	6.12615	2.61498	0.466631	1.21593e-09	5.0519e-08	20.5747	17.8761	122.022	138.812
Inmt	14.7093	6.07747	2.60347	1.2788	0.00146158	0.012657	4.11495	0.893806	29.3322	24.4963
Tspan33	189.199	6.02179	2.59019	0.330091	2.34082e-16	2.3878e-14	65.8392	37.5398	344.946	308.472
1700019D03Rik	8.86294	6.00657	2.58654	2.13491	0.00624672	0.0406216	0	1.78761	16.426	17.2381
Twist2	48.1551	5.99305	2.58329	0.58946	6.39507e-07	1.55319e-05	11.3161	12.5133	96.2095	72.5816
Lmx1a	94.1083	5.98584	2.58155	0.43615	1.86667e-10	9.08288e-09	23.661	25.9204	197.112	129.74
Prss8	16.4292	5.97281	2.57841	1.25993	0.00142665	0.0124054	2.05747	3.57522	12.9062	47.1781
Atp6v0a4	180.289	5.7366	2.5202	0.310494	2.95019e-17	3.30578e-15	55.5518	47.3717	289.802	328.432
Zfp600	26.3731	5.55776	2.4745	0.848835	0.000164519	0.00206395	3.08621	8.93806	48.1048	45.3635
Tmem184a	10.5267	5.55515	2.47383	1.73243	0.00425243	0.0299655	2.05747	0.893806	24.639	14.5163
Mettl7b	814.285	5.51589	2.46359	0.1981	1.11228e-36	5.14118e-34	219.121	271.717	1236.64	1529.66
Ulbp1	688.221	5.49618	2.45843	0.208633	2.95265e-33	1.11981e-30	192.374	222.558	1328.16	1009.79
Fam83e	119.231	5.41905	2.43804	0.408715	1.41698e-10	7.10459e-09	38.0633	31.2832	149.007	258.572
Fat2	47.9926	5.40665	2.43474	0.624259	5.01654e-06	9.8018e-05	8.2299	16.9823	103.249	63.5089
Rhov	83.0815	5.37649	2.42666	0.449357	3.88786e-09	1.49754e-07	23.661	24.1327	118.502	166.03
Arhgap24	95.2902	5.31749	2.41074	0.433787	1.58634e-09	6.51767e-08	29.8334	25.9204	126.715	198.692
Myh14	135.193	5.25621	2.39402	0.426006	1.14626e-09	4.8247e-08	27.7759	51.8407	157.22	303.936
Aass	136.593	5.18405	2.37408	0.347505	4.96518e-13	3.61774e-11	46.2932	37.5398	239.351	223.189
Zfp978	79.0167	5.12213	2.35674	0.52716	4.29647e-07	1.09379e-05	11.3161	33.9646	161.914	108.872
Tmed6	45.2658	5.07833	2.34436	0.656052	1.74376e-05	0.000287535	13.3736	11.6195	48.1048	107.965
Mucl3	45.4812	5.04869	2.33591	0.60355	5.70556e-06	0.000109456	11.3161	14.3009	89.1698	67.138
Mro	30.9108	5.03583	2.33223	0.741013	7.78823e-05	0.00107659	9.25864	7.15044	52.7979	54.4362
Gjb1	319.519	4.933	2.30246	0.274704	3.17103e-18	3.90856e-16	119.334	89.3806	438.809	630.553
Egfr	109.172	4.91433	2.29699	0.380772	9.58922e-11	5.02958e-09	37.0345	32.177	184.206	183.269
Itga7	567.357	4.91139	2.29613	0.204025	1.48287e-30	4.76808e-28	167.684	208.257	964.442	929.045
Cldn3	128.613	4.85109	2.27831	0.357645	1.17106e-11	7.15747e-10	39.092	43.7965	194.766	236.798
Elmo3	343.613	4.8219	2.2696	0.268487	1.76264e-18	2.26706e-16	122.42	106.363	455.235	690.433
B630019K06Rik	62.1304	4.71189	2.2363	0.512364	6.84892e-07	1.64719e-05	23.661	15.1947	104.423	105.243
Syce2	72.7742	4.66625	2.22226	0.473571	1.48286e-07	4.19369e-06	27.7759	18.7699	130.235	114.316
Atp6v0e2	364.384	4.65825	2.21979	0.239103	9.85547e-22	1.69503e-19	142.994	108.15	623.015	583.375
Hpgds	33.1952	4.64204	2.21476	0.720913	0.000102196	0.00137712	7.20116	11.6195	50.4513	63.5089
C920009B18Rik	138.205	4.61941	2.20771	0.346713	1.15546e-11	7.09145e-10	47.3219	45.5841	255.777	204.136
Celf2	101.307	4.59273	2.19935	0.406905	3.82031e-09	1.47536e-07	36.0058	31.2832	141.968	195.97
Slamf9	68.4348	4.58458	2.19679	0.489362	3.98558e-07	1.02345e-05	20.5747	23.2389	133.755	96.1707
Zfp982	145.638	4.57137	2.19263	0.338148	5.38464e-12	3.46279e-10	55.5518	43.7965	226.444	256.758
Usp17la	18.4981	4.55817	2.18846	1.07244	0.00143292	0.0124526	6.17242	2.68142	35.1986	29.9399
Zfp988	48.8497	4.50626	2.17193	0.699287	8.18018e-05	0.00112656	24.6897	4.46903	80.9568	85.2834
Tppp	190.213	4.46407	2.15836	0.344405	2.26734e-11	1.30491e-09	64.8105	67.0354	225.271	403.735
Klhl22	932.048	4.44355	2.15171	0.179266	2.14629e-34	8.57994e-32	358.001	316.407	1640.26	1413.53
Ugt2b34	6813.15	4.42606	2.14602	0.141153	1.80006e-53	1.90177e-50	2562.58	2408.81	10170.1	12111.2
Itgb7	1201.12	4.39188	2.13484	0.4966	9.00813e-07	2.10488e-05	330.225	465.673	2574.19	1434.39
Muc4	60.8716	4.36094	2.12464	0.547169	5.6126e-06	0.000107953	15.4311	24.1327	75.0904	128.832
Mst1	405.136	4.35134	2.12146	0.221343	6.12595e-23	1.16165e-20	138.88	156.416	691.066	634.182
Gyg	218.958	4.34484	2.1193	0.292237	2.70885e-14	2.32946e-12	64.8105	92.062	337.907	381.054
Maob	824.112	4.33676	2.11662	0.249054	1.26105e-18	1.65064e-16	239.696	359.31	1028.97	1668.47
Aifm3	22.8061	4.3035	2.10551	0.901797	0.000781091	0.00762582	6.17242	6.25664	43.4116	35.3835
Casc4	117.274	4.24451	2.0856	0.366829	8.06343e-10	3.48731e-08	38.0633	45.5841	199.459	185.99
Ptpn7	35.0541	4.21158	2.07436	0.753211	0.000258686	0.00301991	12.3448	8.93806	36.3719	82.5616
Cyp2c68	53.7334	4.1733	2.06119	0.570469	1.55199e-05	0.000260858	22.6322	13.4071	72.7438	106.151
Srgap1	50.1092	4.1493	2.05287	0.565083	1.47541e-05	0.000248835	18.5173	15.1947	75.0904	91.6343
Rasgef1a	54.3988	4.08495	2.03032	0.553816	1.32316e-05	0.000226514	17.4885	19.6637	71.5705	108.872
Fam214a	144.111	4.06385	2.02285	0.340502	1.80808e-10	8.85539e-09	49.3794	58.0974	207.672	261.294
Hoxc6	179.511	4.06244	2.02235	0.302341	1.45426e-12	9.95833e-11	65.8392	69.7168	272.203	310.286
Fam83b	103.779	4.06169	2.02208	0.394508	1.82277e-08	6.16946e-07	33.9483	42.0089	151.354	187.805
Tm4sf4	27.2178	4.04839	2.01735	0.837876	0.000665782	0.00667633	7.20116	8.93806	32.852	59.8798
Gm13431	40.9688	4.02901	2.01043	0.644226	8.75939e-05	0.00119963	16.4598	10.7257	58.6644	78.0253
Snap91	11.1909	4.0187	2.00673	2.15985	0.00637922	0.0412391	0	3.57522	17.5993	23.589
Isyna1	628.11	3.97903	1.99242	0.205312	2.1096e-23	4.27439e-21	222.207	271.717	911.644	1106.87
Tcf23	96.1223	3.97708	1.99171	0.401894	4.37686e-08	1.38923e-06	31.8909	39.3274	157.22	156.051
Gm8994	17.3248	3.95284	1.98289	1.15422	0.00263831	0.0203034	6.17242	2.68142	30.5055	29.9399
Gm19276	64.9613	3.93201	1.97527	0.486854	2.78093e-06	5.88451e-05	24.6897	22.3451	110.289	102.522
Il5ra	111.452	3.91548	1.96919	0.416701	1.32228e-07	3.77565e-06	52.4656	31.2832	144.314	217.745
Mcmdc2	19.3599	3.91225	1.968	1.31923	0.00357718	0.0260769	0	8.93806	34.0253	34.4763
Tmem223	126.849	3.89259	1.96073	0.356543	2.32129e-09	9.27952e-08	55.5518	42.0089	202.979	206.858
Tfec	54.536	3.88712	1.9587	0.545075	1.7858e-05	0.000293486	15.4311	23.2389	83.3034	96.1707
Tnfsf15	61.8525	3.86401	1.9501	0.521634	9.80004e-06	0.000175913	28.8046	16.0885	100.903	101.614
Ugt2b36	1233.55	3.86046	1.94877	0.176169	1.32389e-29	4.0795e-27	498.938	500.531	1728.25	2206.48
Apob	6875.75	3.85773	1.94775	0.155491	4.0053e-37	1.97475e-34	2555.38	3038.04	9739.46	12170.1
Hkdc1	1021.96	3.84341	1.94239	0.188135	3.80449e-26	9.07617e-24	398.121	430.814	1404.42	1854.46
Rab7b	215.279	3.83741	1.94013	0.308426	1.94092e-11	1.14375e-09	93.6151	75.9735	412.997	278.532
Il13ra1	83.343	3.81037	1.92993	0.447945	9.38314e-07	2.18217e-05	38.0633	25.0266	119.675	150.607
Sult1d1	845.03	3.79262	1.92319	0.208537	1.92608e-21	3.20096e-19	392.978	297.637	1158.03	1531.47
Pcdh10	79.4532	3.77819	1.9177	0.478297	3.42851e-06	7.08256e-05	32.9196	26.8142	93.863	164.216
Ptgs1	872.18	3.77367	1.91597	0.195916	9.67996e-24	1.98856e-21	321.995	394.168	1220.22	1552.34
Mapt	374.252	3.74006	1.90306	0.226821	3.36142e-18	4.04218e-16	140.937	166.248	581.95	607.871
Arl6ip1	459.948	3.70429	1.8892	0.207151	5.07752e-21	7.98953e-19	197.518	185.018	725.091	732.167
1110002E22Rik	170.076	3.64386	1.86547	0.326341	7.01948e-10	3.06269e-08	58.638	79.5487	306.228	235.89
Cfh	80.0999	3.62431	1.85771	0.467698	4.18595e-06	8.37814e-05	22.6322	39.3274	111.462	146.978
Cys1	115.301	3.60152	1.84861	0.41618	5.43043e-07	1.34317e-05	39.092	52.7345	132.581	236.798
Ptk7	63.1635	3.59172	1.84467	0.509537	1.6513e-05	0.000274739	21.6035	26.8142	84.4767	119.76
Dusp9	599.453	3.58999	1.84398	0.193034	8.68751e-23	1.60621e-20	266.443	245.797	985.561	900.012
Bcas1	605.321	3.57627	1.83845	0.221173	6.49689e-18	7.62663e-16	261.299	254.735	780.236	1125.02
Glyat	116.593	3.56712	1.83476	0.381691	9.59418e-08	2.7825e-06	38.0633	56.3097	204.152	167.845
Ndrg4	30.2352	3.56574	1.8342	0.791406	0.000844767	0.00806126	10.2874	9.83186	64.5308	36.2908
Sec14l2	55.1775	3.54592	1.82616	0.54407	4.21676e-05	0.000630054	19.546	22.3451	104.423	74.3962
Gstm6	45.2181	3.53881	1.82326	0.652308	0.000253407	0.00297236	9.25864	23.2389	62.1842	86.1907
Tox3	163.273	3.51712	1.81439	0.344178	8.52589e-09	3.08329e-07	79.2128	57.2036	210.018	306.657
Map6	73.8546	3.51031	1.8116	0.484291	1.02899e-05	0.00018337	26.7472	31.2832	146.661	90.727
Ccl9	150.521	3.46515	1.79292	0.350685	2.03669e-08	6.84652e-07	66.8679	59.885	187.726	287.605
Sord	3497.66	3.462	1.79161	0.144546	2.03773e-36	9.13337e-34	1540.02	1560.58	4998.2	5891.81
Pde4c	114.536	3.45895	1.79034	0.412859	8.73782e-07	2.0482e-05	52.4656	42.0089	131.408	232.261
Fgfbp1	1554.3	3.43124	1.77873	0.152408	1.26714e-32	4.57129e-30	716.001	669.46	2487.37	2344.39
Rab3il1	54.7195	3.40014	1.76559	0.537528	5.54818e-05	0.000802182	22.6322	20.5575	78.6102	97.0779
Fhl1	322.383	3.37658	1.75556	0.27089	6.32372e-12	4.04909e-10	137.851	145.69	395.398	610.593
Ppfibp2	44.8662	3.28771	1.71708	0.624367	0.000293779	0.00334253	20.5747	14.3009	57.4911	87.098
Mfng	13.6613	3.25947	1.70464	1.61743	0.00625925	0.0406629	2.05747	4.46903	28.1589	19.9599
Jsrp1	15.962	3.25481	1.70257	1.39048	0.0053486	0.0360127	2.05747	6.25664	32.852	22.6818
Cd36	51.2354	3.2487	1.69986	0.581617	0.000176533	0.00217954	26.7472	14.3009	78.6102	85.2834
Steap3	138.581	3.21051	1.6828	0.342795	6.08029e-08	1.86972e-06	53.4943	69.7168	228.791	202.321
Slc17a1	182.756	3.20593	1.68074	0.314336	6.1786e-09	2.29042e-07	67.8967	96.531	258.123	308.472
Serpinb9b	59.5221	3.20182	1.67889	0.511875	5.84555e-05	0.000837806	22.6322	26.8142	99.7294	88.9125
Gm48684	40.9866	3.19591	1.67623	0.650857	0.000478507	0.00509546	19.546	12.5133	57.4911	74.3962
Gm7240	44.1258	3.18478	1.67119	0.604013	0.000290147	0.00331139	16.4598	18.7699	66.8774	74.3962
Galm	370.067	3.16395	1.66173	0.240425	3.48601e-13	2.59103e-11	165.627	178.761	488.087	647.791
Gstp3	116.287	3.1578	1.65892	0.407898	2.9752e-06	6.27763e-05	53.4943	49.1593	130.235	232.261
5830444B04Rik	41.8252	3.13859	1.65012	0.623898	0.0004106	0.00443947	16.4598	16.9823	62.1842	71.6744
Pkhd1l1	216.165	3.10333	1.63382	0.364426	4.78235e-07	1.19891e-05	63.7817	131.389	411.824	257.665
Arhgap40	257.331	3.08159	1.62368	0.263509	5.1405e-11	2.84768e-09	127.563	115.301	355.506	430.953
S100g	87.2419	3.04645	1.60713	0.422216	8.84809e-06	0.000161173	39.092	39.3274	120.849	149.7
Mrgprb2	95.2101	3.02533	1.59709	0.492934	6.77813e-05	0.000953904	52.4656	31.2832	93.863	203.229
Stab2	88.7069	3.02002	1.59456	0.533762	0.000156251	0.00197026	20.5747	55.4159	97.3828	181.454
Celsr1	657.565	3.01668	1.59296	0.22835	2.28186e-13	1.73974e-11	288.046	347.69	797.835	1196.69
9330102E08Rik	25.1761	2.99804	1.58402	0.886212	0.00277684	0.021204	8.2299	9.83186	36.3719	46.2708
Ugt2b5	194.974	2.99148	1.58086	0.298767	8.59426e-09	3.10043e-07	96.7013	89.3806	258.123	335.69
Copz2	57.3721	2.98859	1.57947	0.548043	0.000217895	0.00261976	21.6035	27.708	70.3972	109.78
Myo5b	44.3395	2.97586	1.57331	0.614774	0.000536535	0.00560049	15.4311	21.4513	63.3575	77.118
Ttn	40.403	2.97119	1.57104	0.660215	0.000822183	0.00792508	20.5747	12.5133	58.6644	69.8598
H2-DMb1	308.551	2.96194	1.56654	0.265099	2.43045e-10	1.1522e-08	169.742	129.602	533.846	401.013
D6Ertd527e	29.2929	2.94688	1.55919	0.806582	0.00214585	0.0171101	13.3736	8.93806	42.2383	52.6217
Ttc36	95.5014	2.93159	1.55169	0.426095	1.6804e-05	0.000278642	53.4943	34.8584	126.715	166.938
Nqo1	416.871	2.9001	1.5361	0.232318	2.88634e-12	1.91443e-10	211.92	202.894	535.019	717.651
Prr15l	906.617	2.87588	1.524	0.207208	1.48807e-14	1.33277e-12	452.644	460.31	1095.85	1617.66
Pou6f1	147.966	2.87168	1.5219	0.3292	2.65469e-07	7.11331e-06	75.0978	68.823	202.979	244.963
Cst9	43.3047	2.85654	1.51427	0.6279	0.000803804	0.00781067	14.4023	22.3451	65.7041	70.7671
Susd3	108.755	2.85309	1.51253	0.393623	7.87991e-06	0.000145145	62.753	41.1151	156.047	175.103
Shtn1	236.582	2.8509	1.51142	0.263591	7.36864e-10	3.20558e-08	116.247	119.77	343.773	366.537
2610316D01Rik	31.9854	2.84079	1.50629	0.862632	0.00305847	0.0229401	5.14369	18.7699	58.6644	45.3635
Mettl2	1855.68	2.82415	1.49782	0.179702	6.03395e-18	7.13985e-16	1051.37	852.69	3127.98	2390.66
Crb2	35.7599	2.81485	1.49306	0.733727	0.00186605	0.0153423	9.25864	19.6637	55.1445	58.9726
Slc17a9	82.2514	2.81465	1.49295	0.460498	7.12678e-05	0.000999167	49.3794	27.708	126.715	125.203
Smco4	65.7587	2.80582	1.48842	0.508974	0.000197121	0.00240011	38.0633	22.3451	97.3828	105.243
Thpo	41.2353	2.8044	1.48769	0.671052	0.00127858	0.0113283	11.3161	23.2389	66.8774	63.5089
Tmem151a	242.361	2.77911	1.47462	0.373078	5.28361e-06	0.00010229	97.73	139.434	220.578	511.7
Efcab5	84.0508	2.77735	1.47371	0.426618	3.53433e-05	0.000543978	40.1208	40.2212	136.101	119.76
Gm3776	84.4894	2.77315	1.47153	0.460805	8.65752e-05	0.00118895	44.2357	35.7522	97.3828	160.587
Mgam	53.4868	2.74359	1.45606	0.557528	0.000500616	0.00529467	22.6322	25.9204	69.2239	96.1707
Zfp985	513.642	2.74001	1.45418	0.227781	1.31727e-11	7.98516e-10	316.851	216.301	791.969	729.445
Slc5a3	1676.12	2.7336	1.4508	0.154476	4.90532e-22	8.74152e-20	820.932	948.328	2427.53	2507.7
Dmbt1	203.003	2.72256	1.44496	0.301943	1.26866e-07	3.64364e-06	106.989	100.106	251.083	353.835
Dhrs11	269.995	2.71803	1.44256	0.249375	5.67375e-10	2.50509e-08	136.822	143.009	391.878	408.272
Rab10os	142.969	2.71078	1.43871	0.343878	1.99877e-06	4.37982e-05	82.299	61.6726	234.657	193.249
Fer1l6	476.939	2.70495	1.4356	0.205015	2.04457e-13	1.59165e-11	251.012	251.159	665.254	740.333
Igf2bp1	785.187	2.69827	1.43204	0.19116	5.64327e-15	5.31654e-13	363.144	466.566	1201.45	1109.59
C1qtnf6	108.38	2.67802	1.42117	0.408892	3.43286e-05	0.00053168	47.3219	59.885	126.715	199.599
Guca2a	32.0416	2.67401	1.419	0.768453	0.00277964	0.0212145	10.2874	16.0885	52.7979	48.9926
Tmem71	89.1979	2.67375	1.41886	0.423622	5.29586e-05	0.000767951	40.1208	47.3717	151.354	117.945
Gpd1	366.073	2.66957	1.4166	0.292142	9.26913e-08	2.70948e-06	234.552	145.69	423.557	660.493
Sdc3	35.5653	2.66611	1.41474	0.702725	0.00205061	0.016547	14.4023	16.0885	52.7979	58.9726
Gm15398	107.916	2.63475	1.39767	0.395501	2.74469e-05	0.000435121	65.8392	42.9027	167.78	155.143
Aldh1a1	1584.48	2.6342	1.39737	0.151082	1.87371e-21	3.14932e-19	884.714	834.814	2238.63	2379.77
Cemip	290.732	2.62536	1.39251	0.269158	1.83015e-08	6.18031e-07	122.42	184.124	411.824	444.562
Ank1	87.3951	2.59407	1.37522	0.432836	9.6878e-05	0.00131582	45.2644	42.0089	152.527	109.78
Tcp11x2	77.0256	2.55817	1.35511	0.445623	0.000154618	0.00195633	37.0345	40.2212	113.809	117.038
Tnxb	2585.24	2.55115	1.35115	0.169143	1.20122e-16	1.26009e-14	1410.4	1450.65	3174.92	4305
Cyp4f14	69.5033	2.53494	1.34195	0.569528	0.00102204	0.00945403	36.0058	30.3894	61.0109	150.607
Tha1	40.9563	2.53085	1.33962	0.673604	0.00223736	0.0176683	23.661	13.4071	66.8774	59.8798
3830403N18Rik	543.213	2.52972	1.33898	0.209184	1.28973e-11	7.85034e-10	329.196	269.929	850.633	723.094
Lonrf3	299.955	2.51185	1.32875	0.293716	4.85705e-07	1.21148e-05	115.219	208.257	411.824	464.522
Fam117a	195.423	2.51077	1.32813	0.289549	3.5524e-07	9.25063e-06	115.219	96.531	276.896	293.048
Hpx	148.253	2.50972	1.32752	0.344997	8.91449e-06	0.000161945	84.3565	73.2921	179.513	255.85
Cdc27	3530.32	2.49899	1.32135	0.136916	4.43805e-23	8.52508e-21	1903.16	2084.35	4975.91	5157.83
Slc7a4	241.159	2.49742	1.32044	0.285008	2.83769e-07	7.56258e-06	157.397	105.469	346.12	355.65
Slc18a1	44.9459	2.49501	1.31904	0.613876	0.00167591	0.0141003	22.6322	19.6637	62.1842	75.3034
Rab3b	432.137	2.49448	1.31874	0.245767	6.83797e-09	2.5222e-07	203.69	272.611	529.153	723.094
Pla1a	1054.5	2.48012	1.31041	0.191409	6.65058e-13	4.75211e-11	655.306	530.027	1326.99	1705.67
Mtmr1	642.44	2.47958	1.31009	0.191978	7.7261e-13	5.46778e-11	394.006	328.027	918.684	929.045
Atp2b4	54.2421	2.4737	1.30667	0.577497	0.00132788	0.0116978	23.661	28.6018	62.1842	102.522
Fnip1	1688.87	2.47176	1.30554	0.148608	1.36366e-19	1.92094e-17	928.95	988.549	2462.73	2375.23
Dusp22	250.653	2.4693	1.3041	0.260727	4.76219e-08	1.49232e-06	127.563	149.266	351.986	373.795
Timp1	370.262	2.46726	1.30291	0.248796	1.37176e-08	4.76283e-07	175.914	234.177	601.896	469.059
Gstt1	718.078	2.46502	1.3016	0.220881	3.31876e-10	1.54364e-08	365.202	438.859	838.9	1229.35
Klhl13	34.5184	2.46043	1.29891	0.783381	0.00409976	0.0291676	18.5173	11.6195	39.8918	68.0453
Bicdl1	289.637	2.43882	1.28618	0.247492	1.70727e-08	5.8185e-07	176.943	147.478	417.69	416.437
1700052K11Rik	311.92	2.43518	1.28403	0.273822	2.302e-07	6.26921e-06	156.368	190.381	360.199	540.733
Gpd1l	2390.61	2.43304	1.28276	0.158632	5.45149e-17	5.99172e-15	1357.93	1382.72	3021.21	3800.56
Eno2	259.098	2.43087	1.28147	0.28891	7.60051e-07	1.81614e-05	129.621	157.31	300.362	449.099
Dhx40	404.893	2.42722	1.2793	0.213807	1.92338e-10	9.32742e-09	227.351	231.496	593.683	567.044
Sall1	121.311	2.42283	1.27669	0.370007	4.11966e-05	0.000621119	77.1553	53.6283	174.82	179.64
Ahrr	87.1066	2.41677	1.27308	0.426858	0.000196386	0.00239864	51.4369	40.2212	136.101	120.667
Fgf1	1310.67	2.41171	1.27006	0.20043	2.12998e-11	1.24034e-09	658.392	839.283	1555.78	2189.24
Diaph2	610.317	2.40924	1.26858	0.200468	2.25007e-11	1.30003e-09	306.564	390.593	885.832	858.278
B3galt4	67.5069	2.38865	1.2562	0.480368	0.00058025	0.00597527	33.9483	35.7522	103.249	97.0779
Gm3336	160.937	2.38538	1.25422	0.317003	6.1746e-06	0.000116938	79.2128	99.2124	227.618	237.705
Ttr	377.932	2.37381	1.2472	0.302114	3.03271e-06	6.37171e-05	166.655	256.522	395.398	693.155
Fam98c	59.7715	2.36786	1.24358	0.518634	0.00102394	0.00946466	27.7759	33.0708	93.863	84.3761
Cobl	565.614	2.3655	1.24214	0.22405	2.66463e-09	1.051e-07	266.443	383.443	865.886	746.684
2022-03-03	54.4157	2.35892	1.23813	0.612243	0.00229713	0.0180248	28.8046	24.1327	110.289	54.4362
Gpr146	216.194	2.35556	1.23607	0.311768	6.09486e-06	0.000115724	95.6726	146.584	268.683	353.835
Fgfr4	170.087	2.35352	1.23482	0.346861	2.93805e-05	0.00046428	88.4714	100.106	184.206	307.565
P2rx4	1633.79	2.33939	1.22613	0.210748	5.45461e-10	2.4228e-08	1011.25	891.124	1765.8	2866.97
Dhrs9	158.353	2.33644	1.22431	0.37013	7.29306e-05	0.00101958	60.6955	113.513	200.632	258.572
Entpd2	286.501	2.33623	1.22418	0.276953	8.44893e-07	1.98677e-05	182.087	145.69	335.56	482.668
Pik3c2g	511.537	2.33136	1.22117	0.265633	3.77153e-07	9.76654e-06	244.839	342.328	552.618	906.363
Chrd	106.117	2.3231	1.21605	0.393261	0.000148466	0.00189174	63.7817	52.7345	133.755	174.196
Cyp4f17	46.204	2.32197	1.21535	0.608992	0.0025448	0.0196965	19.546	25.9204	70.3972	68.9525
Camkk1	560.389	2.31758	1.21262	0.197495	7.82579e-11	4.25556e-09	302.449	355.735	793.142	790.232
Hsf2bp	378.215	2.31277	1.20962	0.245307	7.25859e-08	2.18215e-06	260.271	179.655	518.593	554.342
Zfp991	338.1	2.30911	1.20733	0.253912	1.74136e-07	4.86891e-06	232.495	159.991	496.3	463.615
Mpp1	6397.17	2.29761	1.20014	0.160148	6.78727e-15	6.23544e-13	3573.83	4058.77	7748.39	10207.7
Zfp72	110.479	2.29688	1.19967	0.373359	0.000101406	0.00136977	65.8392	57.2036	161.914	156.958
Slc7a3	37.8808	2.27898	1.18839	0.695079	0.00432375	0.0303957	16.4598	19.6637	52.7979	62.6017
2210011C24Rik	49.2767	2.27666	1.18692	0.622278	0.00309821	0.0231794	16.4598	32.177	78.6102	69.8598
Fam234b	397.596	2.26501	1.17951	0.244507	1.27872e-07	3.6654e-06	242.782	225.239	660.561	461.801
Cyp2s1	1944.56	2.25828	1.17523	0.190377	6.60488e-11	3.6049e-09	1032.85	1297.81	2270.31	3177.26
Cdhr2	970.09	2.25816	1.17515	0.199495	3.82894e-10	1.75337e-08	541.116	619.407	1135.74	1584.09
Papln	89.8646	2.2528	1.17172	0.465681	0.000825318	0.00793711	47.3219	50.0531	91.5164	170.567
Fahd2a	180.117	2.25223	1.17136	0.298051	7.39702e-06	0.000137795	111.104	98.3186	245.217	265.83
Gk	1308.04	2.2438	1.16594	0.166268	2.27463e-13	1.73974e-11	862.082	721.301	1899.55	1749.22
Dynlt3	1727.56	2.23918	1.16297	0.190892	1.09026e-10	5.61882e-09	1239.63	843.752	2265.62	2561.22
4930461G14Rik	898.204	2.23901	1.16286	0.171949	1.2652e-12	8.74466e-11	575.064	512.151	1227.26	1278.34
Ldhd	217.757	2.23149	1.15801	0.323567	2.95523e-05	0.000466498	118.305	134.071	227.618	391.034
Rnf113a2	100.554	2.2302	1.15717	0.402268	0.000306998	0.00346891	63.7817	49.1593	131.408	157.865
Tom1l2	1663.66	2.22754	1.15545	0.154087	6.50085e-15	6.04743e-13	987.588	1041.28	2167.06	2458.7
Rrad	29.5529	2.22484	1.1537	0.868047	0.00717931	0.0451485	16.4598	9.83186	49.2781	42.6417
Flcn	1730.92	2.21927	1.15009	0.151353	3.25474e-15	3.16716e-13	1039.02	1079.72	2269.14	2535.82
Slc41a2	206.556	2.21341	1.14627	0.292137	7.80297e-06	0.000144267	133.736	109.938	260.47	322.081
Sptssb	5439.04	2.20771	1.14255	0.188137	1.26505e-10	6.43003e-09	3869.08	2755.6	6422.57	8708.89
Gm14403	43.1736	2.19919	1.13697	0.641654	0.00412726	0.0293351	23.661	19.6637	70.3972	58.9726
R74862	88.4831	2.19701	1.13554	0.446566	0.000808565	0.00783714	38.0633	59.885	112.636	143.349
Wdr44	273.092	2.1935	1.13324	0.249459	5.30977e-07	1.31773e-05	156.368	171.611	394.224	370.166
Xiap	3087.12	2.18809	1.12967	0.158697	1.1396e-13	9.36431e-12	2134.63	1674.1	4076	4463.77
Akr1c19	3225.04	2.1867	1.12876	0.139643	6.85754e-17	7.34999e-15	2013.24	1982.46	4203.89	4700.57
Ngef	326.301	2.18294	1.12627	0.23984	2.59201e-07	6.97062e-06	196.489	198.425	409.477	500.813
Lcp1	133.004	2.18243	1.12594	0.378154	0.000238172	0.00282276	59.6668	92.9558	160.74	218.652
Plcxd2	348.27	2.18025	1.12449	0.241489	3.11437e-07	8.25531e-06	188.259	232.389	531.499	440.933
Dock9	576.727	2.17499	1.12101	0.207949	7.12107e-09	2.62009e-07	304.506	400.425	827.167	774.809
Vstm5	429.33	2.17021	1.11783	0.2682	2.87534e-06	6.07558e-05	237.638	277.974	754.424	447.284
Sv2a	202.056	2.16953	1.11739	0.297489	1.55479e-05	0.000261031	139.908	101	293.322	273.996
4933439C10Rik	210.451	2.16554	1.11472	0.279833	6.37197e-06	0.000119908	117.276	134.965	307.401	282.161
Ercc6l	1235.63	2.16442	1.11398	0.201663	3.39219e-09	1.31345e-07	623.415	894.699	1898.38	1526.03
Exph5	256.724	2.16348	1.11335	0.275419	5.03745e-06	9.81673e-05	130.65	177.867	327.347	391.034
Angpt2	663.817	2.16221	1.11251	0.197776	1.90804e-09	7.75323e-08	434.127	384.336	822.474	1014.33
Elf4	1093.4	2.16211	1.11244	0.171059	8.14206e-12	5.0814e-10	696.455	659.628	1376.27	1641.25
Lmbrd2	1158.4	2.15842	1.10997	0.158012	2.24119e-13	1.72653e-11	730.404	711.469	1580.42	1611.31
Stx3	493.963	2.15816	1.1098	0.204651	5.97289e-09	2.22532e-07	299.363	308.363	732.131	635.997
Kansl1	2009.61	2.15433	1.10724	0.151931	3.36343e-14	2.87564e-12	1153.21	1354.12	2754.88	2776.25
Smarca1	185.977	2.1507	1.10481	0.303306	2.46183e-05	0.000393228	123.448	99.2124	238.177	283.068
Fam3a	395.933	2.14206	1.099	0.221274	6.88233e-08	2.09028e-06	265.414	222.558	543.232	552.528
Pdk3	318.367	2.14109	1.09834	0.264531	3.22407e-06	6.70707e-05	161.512	225.239	389.531	497.184
Padi4	306.699	2.13814	1.09635	0.236205	3.47393e-07	9.07826e-06	185.173	191.274	421.21	429.139
Xkr9	344.149	2.12856	1.08988	0.2432	7.34592e-07	1.761e-05	242.782	180.549	466.968	486.297
Phka1	504.193	2.1282	1.08964	0.199171	4.71679e-09	1.80274e-07	314.794	312.832	668.774	720.373
Akap17b	124.353	2.1237	1.08658	0.350823	0.000170223	0.00212649	70.9829	75.9735	177.166	173.289
Ndufb11	3662.82	2.11873	1.0832	0.138227	5.00426e-16	5.03524e-14	2420.62	2214.85	4819.86	5195.94
Cetn2	516.027	2.11396	1.07995	0.22412	1.48186e-07	4.19369e-06	372.403	269.035	660.561	762.107
Dlx4os	121.482	2.10949	1.07689	0.359107	0.000236288	0.00280493	66.8679	76.8673	160.74	181.454
S100a7a	84.8349	2.10704	1.07522	0.559244	0.00338927	0.0249406	46.2932	44.6903	183.033	65.3235
Peli1	1115.91	2.10675	1.07502	0.193134	2.8217e-09	1.10705e-07	618.271	782.08	1334.03	1729.26
Fbxo17	55.0716	2.10521	1.07396	0.548613	0.00324737	0.0241002	31.8909	27.708	84.4767	76.2107
Acsm3	142.274	2.10359	1.07285	0.356466	0.000230387	0.00274368	75.0978	93.8496	164.26	235.89
1810019D21Rik	97.6854	2.10317	1.07256	0.402462	0.000623736	0.00631463	62.753	50.9469	145.488	131.554
Gsta2	143.616	2.0834	1.05894	0.353611	0.000243005	0.00287084	99.7875	72.3982	173.646	228.632
Pgrmc1	6165.97	2.08119	1.05741	0.132116	1.3963e-16	1.45441e-14	4022.36	3885.37	7970.14	8786.01
Itih5	615.867	2.08113	1.05737	0.199827	1.3312e-08	4.63289e-07	363.144	414.726	763.81	921.787
Mgat4a	370.24	2.08033	1.05681	0.220874	1.81431e-07	5.04425e-06	224.265	240.434	512.726	503.535
9930111J21Rik2	118.096	2.06969	1.04941	0.38577	0.000558227	0.0057942	54.5231	84.9115	175.993	156.958
Abcd1	239.52	2.06518	1.04627	0.296611	4.12743e-05	0.000621119	135.793	159.097	263.99	399.199
Gpsm3	83.8086	2.0577	1.04103	0.453245	0.00166488	0.0140235	56.5806	40.2212	103.249	135.183
Slc19a2	873.729	2.04776	1.03405	0.16908	1.10311e-10	5.66532e-09	569.92	554.159	1165.07	1205.76
Naip6	273.732	2.04716	1.03362	0.299768	5.59141e-05	0.000806854	155.339	183.23	282.762	473.595
Abcg2	597.004	2.04279	1.03054	0.189505	6.11848e-09	2.27383e-07	377.547	387.912	777.889	844.669
G6pdx	1868.7	2.04146	1.0296	0.160462	1.6375e-11	9.76622e-10	1088.4	1324.62	2413.45	2648.32
Gtpbp10	56.7303	2.03919	1.028	0.554314	0.00423929	0.0299157	24.6897	37.5398	82.1301	82.5616
Maoa	2203.91	2.03904	1.02789	0.144432	1.33176e-13	1.0764e-11	1484.47	1374.67	2886.29	3070.2
Cpq	504.431	2.03688	1.02636	0.220498	3.54553e-07	9.24903e-06	365.202	277.974	632.402	742.147
Chm	834.734	2.03548	1.02537	0.179082	1.14819e-09	4.8247e-08	582.265	493.381	1102.89	1160.4
Scn8a	347.65	2.03442	1.02462	0.227079	6.99531e-07	1.67967e-05	231.466	210.938	464.622	483.575
Chchd6	430.926	2.03392	1.02426	0.220516	3.77693e-07	9.76654e-06	256.156	293.168	533.846	640.533
Zxdb	57.0885	2.03359	1.02403	0.54098	0.0039661	0.0284493	33.9483	29.4956	75.0904	89.8198
Smtnl2	294.247	2.02746	1.01967	0.247108	3.97362e-06	8.0402e-05	177.972	194.85	369.585	434.583
C1galt1c1	1296.17	2.02655	1.01902	0.165759	9.07039e-11	4.82867e-09	904.26	775.823	1847.93	1656.68
Mreg	91.1265	2.02607	1.01869	0.444611	0.00176491	0.0146656	39.092	67.0354	123.195	135.183
Gngt2	201.519	2.01691	1.01214	0.317892	0.000143192	0.00183182	120.362	129.602	215.885	340.226
Soat1	2451.59	2.01554	1.01117	0.174673	8.37993e-10	3.60313e-08	1422.74	1759.9	2883.94	3739.77
Epas1	546.495	2.01475	1.0106	0.207764	1.31638e-07	3.76608e-06	311.707	391.487	701.626	781.16
Irak1	2393.36	2.01465	1.01053	0.144233	2.98353e-13	2.24007e-11	1496.81	1632.09	3102.17	3342.38
Sh3bgrl	3003.2	2.01448	1.01041	0.204053	8.32637e-08	2.46683e-06	2386.67	1484.61	3655.96	4485.54
Slc36a1	338.981	2.01354	1.00973	0.227536	1.00795e-06	2.32948e-05	222.207	211.832	464.622	457.264
Mid1ip1	1749.7	2.01172	1.00843	0.149222	1.49819e-12	1.0165e-10	1091.49	1193.23	2400.55	2313.54
Zfp182	167.168	2.0074	1.00533	0.313875	0.000134379	0.00173741	116.247	92.062	221.751	238.612
Ddr2	261.311	2.00665	1.00479	0.25368	8.12185e-06	0.00014923	164.598	168.035	337.907	374.703
Frmd7	231.306	2.00233	1.00168	0.280723	3.77251e-05	0.000574658	123.448	168.035	326.174	307.565
Clcn5	1213.56	2.00168	1.00121	0.189193	1.44451e-08	5.00368e-07	655.306	920.62	1694.23	1584.09
Clu	18918.6	0.500404	-0.998834	0.153936	1.03579e-11	6.41021e-10	25494.2	25372.5	10613.6	14194.2
Pdlim1	521.89	0.499149	-1.00246	0.222929	7.6229e-07	1.81855e-05	600.783	816.044	313.268	357.465
Cachd1	223.469	0.49758	-1.007	0.269691	1.96081e-05	0.000318706	302.449	309.257	136.101	146.071
Atxn1	158.941	0.49689	-1.009	0.314764	0.000130229	0.00170238	228.38	210.044	102.076	95.2634
Hmga2	3201.2	0.496227	-1.01093	0.163177	5.88966e-11	3.22645e-09	4815.52	3829.06	2258.58	1901.64
Ctso	145.733	0.494437	-1.01614	0.348336	0.000322081	0.00360356	236.61	168.929	82.1301	95.2634
Nupr1	961.013	0.493077	-1.02012	0.173827	5.0607e-10	2.26827e-08	1194.36	1406.85	627.709	615.129
Slc39a10	894.6	0.492923	-1.02057	0.170599	2.5367e-10	1.19112e-08	1166.59	1254.9	560.831	596.077
Gm20186	131.259	0.491664	-1.02426	0.359032	0.000389014	0.00423704	205.747	160.885	70.3972	88.0052
Hyal2	1042.37	0.489893	-1.02946	0.198274	2.27554e-08	7.52964e-07	1663.47	1173.57	634.748	697.691
Slc15a2	364.028	0.489817	-1.02968	0.229582	7.79844e-07	1.85744e-05	522.599	472.823	211.192	249.499
Fbxo2	335.1	0.485669	-1.04195	0.234121	8.83527e-07	2.06776e-05	479.392	438.859	225.271	196.878
Zfp850	251.651	0.483679	-1.04788	0.271704	1.115e-05	0.000195514	364.173	329.814	178.34	134.276
Oaf	1984.99	0.482913	-1.05017	0.165774	2.61294e-11	1.48646e-09	3045.06	2359.65	1265.98	1269.27
Tjp3	1086.99	0.48119	-1.05532	0.221309	1.94127e-07	5.3675e-06	1551.34	1433.66	509.207	853.741
Dctd	670.11	0.4811	-1.05559	0.187921	2.07034e-09	8.36245e-08	890.887	939.39	456.409	393.755
Dpysl3	456.255	0.479742	-1.05967	0.208484	3.94364e-08	1.26256e-06	599.754	651.584	273.376	300.306
Efna4	255.83	0.478341	-1.06389	0.256901	3.44365e-06	7.10391e-05	341.541	365.566	150.181	166.03
Gm50397	287.522	0.47818	-1.06438	0.27882	1.26642e-05	0.000218062	385.777	410.257	217.058	136.998
Fermt1	2187.73	0.476274	-1.07014	0.177112	1.63916e-10	8.13586e-09	2986.42	3004.97	1142.78	1616.76
H1f0	19411.9	0.475389	-1.07282	0.157213	1.02356e-12	7.14128e-11	27181.3	25856.9	10438.7	14170.7
Tnfaip2	6777.97	0.47452	-1.07546	0.142316	4.52273e-15	4.34388e-13	10114.5	8396.41	4405.69	4195.22
Spsb1	139.103	0.473849	-1.0775	0.337575	0.000123815	0.00162931	210.891	179.655	83.3034	82.5616
Pcdhb22	61.7053	0.473272	-1.07926	0.524577	0.00259029	0.0199963	99.7875	79.5487	37.5452	29.9399
Shisa4	368.191	0.47322	-1.07942	0.250992	1.71446e-06	3.80553e-05	518.484	502.319	180.686	271.274
Gm13147	141.254	0.472578	-1.08138	0.360882	0.000225948	0.00269734	219.121	178.761	100.903	66.2307
Ehf	2690.13	0.471238	-1.08547	0.154117	2.02318e-13	1.59165e-11	3781.64	3591.31	1515.89	1871.7
Pkdcc	1334.66	0.470923	-1.08644	0.17683	8.53677e-11	4.60395e-09	1994.72	1673.2	746.211	924.508
Myo7a	238.089	0.46977	-1.08997	0.329955	8.49522e-05	0.00116778	298.334	371.823	96.2095	185.99
Ripk2	298.163	0.469153	-1.09187	0.240977	5.72606e-07	1.40922e-05	405.323	420.982	191.246	175.103
Serpine1	1545.46	0.468554	-1.09371	0.190045	8.84053e-10	3.7792e-08	2500.86	1757.22	1021.93	901.827
Pfn2	113.154	0.467816	-1.09599	0.371868	0.000262159	0.00304946	167.684	152.841	70.3972	61.6944
Gm30042	174.599	0.467124	-1.09812	0.323192	5.94126e-05	0.000849876	289.075	202	102.076	105.243
Cd44	6983.29	0.466362	-1.10048	0.15025	2.57326e-14	2.2258e-12	9386.2	9803.26	3839	4904.7
Ier3	1103.25	0.46444	-1.10643	0.177838	5.09578e-11	2.83352e-09	1370.28	1674.1	638.268	730.353
Aspa	116.271	0.463505	-1.10934	0.383207	0.000300373	0.00340185	192.374	138.54	71.5705	62.6017
Nfkbie	911.524	0.463374	-1.10975	0.1718	1.09273e-11	6.73442e-10	1285.92	1229.88	531.499	598.798
Casp4	671.517	0.463222	-1.11022	0.190147	5.37905e-10	2.39643e-08	854.881	1001.96	400.091	429.139
Pde9a	447.148	0.463134	-1.1105	0.24231	4.46712e-07	1.13333e-05	578.15	667.673	217.058	325.71
B4galt4	432.857	0.460742	-1.11797	0.214939	1.92098e-08	6.47228e-07	575.064	626.558	283.935	245.87
2810408A11Rik	214.55	0.459229	-1.12272	0.283895	6.96627e-06	0.000130263	329.196	273.504	118.502	136.998
B3galt6	354.825	0.458747	-1.12423	0.23519	1.67089e-07	4.68958e-06	547.288	442.434	210.018	219.559
Rab11fip5	186.642	0.454931	-1.13628	0.399367	0.000327537	0.00365079	242.782	291.381	152.527	59.8798
Syne1	896.363	0.454261	-1.13841	0.218001	1.71157e-08	5.81974e-07	1208.77	1294.23	416.517	665.936
Tnnt2	628.948	0.453067	-1.1422	0.191132	2.21541e-10	1.06046e-08	877.513	872.354	412.997	352.928
Plcb1	90.2204	0.453008	-1.14239	0.585369	0.0029539	0.0223144	141.966	126.92	17.5993	74.3962
Onecut3	216.676	0.452323	-1.14458	0.292001	7.79231e-06	0.00014425	258.213	353.053	130.235	125.203
Hoxa10	252.78	0.450997	-1.14881	0.267112	1.55962e-06	3.47939e-05	366.23	345.903	130.235	168.752
Eng	42.7602	0.450662	-1.14988	0.653818	0.00413802	0.0293833	69.9541	58.9912	17.5993	24.4963
Rpl14-ps1	60.8084	0.449149	-1.15473	0.53802	0.00196123	0.0159213	72.0116	107.257	34.0253	29.9399
Traf1	198.502	0.448949	-1.15538	0.338367	5.08278e-05	0.000743237	310.679	253.841	147.834	81.6543
Arl4c	1237.69	0.448054	-1.15825	0.168872	7.0798e-13	5.03448e-11	1761.2	1688.4	674.64	826.523
Nptxr	298.906	0.447676	-1.15947	0.24819	2.71683e-07	7.26343e-06	382.69	457.628	186.553	168.752
Vnn1	4933.97	0.446962	-1.16178	0.152974	3.03504e-15	2.97293e-13	7582.82	6155.64	2794.77	3202.66
Lysmd2	174.172	0.446744	-1.16248	0.306107	1.25974e-05	0.00021742	248.954	245.797	90.3431	111.594
Gucy2g	43.5753	0.443866	-1.17181	0.64314	0.00359089	0.0261393	75.0978	56.3097	21.1192	21.7745
Il18rap	320.222	0.442473	-1.17634	0.307457	1.05693e-05	0.000186997	477.334	432.602	247.564	123.389
Mtap	10454.4	0.442162	-1.17735	0.126714	1.44232e-21	2.4521e-19	14277.8	14861.3	6548.12	6130.43
Apol9b	75.0856	0.441932	-1.1781	0.473172	0.000868994	0.00825825	96.7013	123.345	34.0253	46.2708
Fam107a	85.79	0.441912	-1.17817	0.450598	0.000628544	0.00635293	111.104	139.434	36.3719	56.2508
Mex3d	960.103	0.440723	-1.18206	0.178685	3.60741e-12	2.38202e-10	1270.49	1421.15	520.939	627.831
Acat3	33.8396	0.437448	-1.19282	0.793727	0.00551317	0.036815	47.3219	57.2036	19.9459	10.8872
Pik3r3	181.994	0.436167	-1.19705	0.302226	6.30326e-06	0.000118841	271.587	248.478	92.6897	115.223
Ttyh3	713.309	0.435145	-1.20043	0.182989	5.06687e-12	3.27267e-10	971.128	1036.81	398.918	446.377
Sema4c	521.25	0.434332	-1.20313	0.199707	1.42608e-10	7.12608e-09	775.668	695.381	310.921	303.028
Slc20a1	828.244	0.431304	-1.21322	0.177994	8.84938e-13	6.20337e-11	1130.58	1205.74	454.062	522.588
Sod3	45.1565	0.431261	-1.21337	0.735375	0.0045463	0.031674	61.7242	77.7611	9.3863	31.7545
Naprt	139.959	0.430962	-1.21437	0.410253	0.000222253	0.00265752	246.897	161.779	50.4513	100.707
Itga2	1861.36	0.430455	-1.21607	0.152439	1.42579e-16	1.47475e-14	2702.49	2538.41	1027.8	1176.73
Eps8l3	897.73	0.427852	-1.22482	0.171708	9.14391e-14	7.64111e-12	1232.43	1304.06	500.994	553.435
Rbp2	536.836	0.427039	-1.22756	0.235097	1.57161e-08	5.40596e-07	882.657	646.221	262.816	355.65
Lamb1	754.383	0.426285	-1.23011	0.198992	5.68817e-11	3.13932e-09	951.582	1186.08	483.394	396.477
Tcim	735.12	0.425752	-1.23191	0.201183	8.44091e-11	4.57324e-09	986.559	1100.27	363.719	489.926
Gls2	1725.35	0.425501	-1.23277	0.167941	1.96664e-14	1.73147e-12	2698.38	2182.67	939.803	1080.56
Il1rn	195.698	0.425266	-1.23356	0.375687	7.72081e-05	0.00106994	291.133	278.867	62.1842	150.607
Ptpn22	65.5495	0.42499	-1.2345	0.503709	0.000877593	0.00832616	105.96	88.4867	38.7185	29.0327
Tmem56	234.153	0.422278	-1.24373	0.283288	9.52611e-07	2.20848e-05	321.995	351.266	109.116	154.236
Ptpn5	29.7179	0.421876	-1.24511	0.910611	0.00609545	0.0399409	63.7817	30.3894	12.9062	11.7945
Hrh1	53.0839	0.421096	-1.24778	0.558204	0.00146658	0.0126855	85.3852	74.1859	24.639	28.1254
Ccdc3	175.535	0.420284	-1.25056	0.301278	2.69319e-06	5.72341e-05	255.127	251.159	91.5164	104.336
Casp1	455.258	0.418948	-1.25516	0.211157	2.478e-10	1.171e-08	660.449	639.071	239.351	282.161
Adamts4	116.088	0.415905	-1.26567	0.379333	6.29408e-05	0.000894291	176.943	161.779	73.9171	51.7144
E230025N22Rik	138.979	0.413748	-1.27317	0.357905	2.78068e-05	0.000439883	239.696	166.248	69.2239	80.7471
Socs1	57.9028	0.413594	-1.27371	0.542737	0.00111383	0.0101445	75.0978	99.2124	24.639	32.6617
Lurap1	46.5945	0.411534	-1.28092	0.611295	0.00188954	0.0154581	79.2128	62.5664	24.639	19.9599
Creb5	227.541	0.408441	-1.2918	0.284837	4.53834e-07	1.14439e-05	287.018	371.823	136.101	115.223
Bmf	2716.24	0.408216	-1.29259	0.18984	8.18119e-13	5.76229e-11	4555.25	3237.36	1334.03	1738.33
Spp1	22238.1	0.406662	-1.2981	0.177686	2.36566e-14	2.07044e-12	35288.8	28470.4	14893.7	10299.3
Rcor2	341.926	0.406302	-1.29938	0.243998	8.22188e-09	3.00271e-07	435.156	551.478	204.152	176.918
Gzmm	20.0046	0.404715	-1.30502	1.17715	0.00732984	0.0459583	30.8621	34.8584	7.03972	7.25816
Gm45091	22.6086	0.40282	-1.31179	1.06307	0.00670152	0.042834	37.0345	36.646	5.86644	10.8872
Slc16a2	154.844	0.401563	-1.3163	0.320061	2.99822e-06	6.30821e-05	217.064	235.965	77.437	88.9125
Mctp1	61.2186	0.40029	-1.32088	0.509998	0.000573205	0.00591823	97.73	86.6991	30.5055	29.9399
Parp8	444.056	0.39963	-1.32326	0.209872	2.42689e-11	1.38595e-09	611.07	672.142	241.697	251.314
Thbs1	716.256	0.399424	-1.32401	0.199804	2.87918e-12	1.91443e-10	1168.65	900.062	378.972	417.344
Oasl2	34.7172	0.398882	-1.32597	0.746029	0.00333009	0.0245908	45.2644	63.4602	12.9062	17.2381
Cacna2d1	379.341	0.398042	-1.32901	0.23072	6.84374e-10	2.99484e-08	610.041	489.805	208.845	208.672
Zfp61	62.9182	0.397071	-1.33253	0.503578	0.000484239	0.0051417	95.6726	93.8496	34.0253	28.1254
F3	1087.19	0.396575	-1.33433	0.161724	1.36314e-17	1.55094e-15	1556.48	1578.46	587.817	626.017
Spin4	44.6839	0.396405	-1.33495	0.619365	0.00158652	0.0134786	70.9829	66.1416	23.4657	18.1454
Hist1h4i	52.9854	0.396267	-1.33546	0.632872	0.00168975	0.0141765	102.874	59.885	32.852	16.3309
Ddit4	3707.8	0.396026	-1.33633	0.158168	2.52722e-18	3.19488e-16	5642.62	5050.9	1815.08	2322.61
Hs3st5	56.3158	0.395702	-1.33751	0.627615	0.00170086	0.0142535	63.7817	109.938	15.2527	36.2908
Zfp677	102.345	0.395414	-1.33857	0.447572	0.000182594	0.00224315	159.454	147.478	31.6788	70.7671
Cyp1b1	78.145	0.394626	-1.34144	0.453184	0.00019935	0.00242482	117.276	117.089	32.852	45.3635
Angptl2	27.9013	0.393212	-1.34662	0.96683	0.0052303	0.0354057	50.4081	39.3274	16.426	5.44362
Tlr2	178.571	0.392679	-1.34858	0.302266	6.27574e-07	1.52672e-05	256.156	268.142	85.65	104.336
Col4a1	2463.59	0.392246	-1.35017	0.173419	5.73064e-16	5.72715e-14	3322.82	3805.82	1569.86	1155.86
Gbp9	142.575	0.391915	-1.35139	0.354497	9.54042e-06	0.000171879	216.035	204.681	91.5164	58.0653
Gprin3	58.8312	0.390216	-1.35765	0.527579	0.000586411	0.00601498	96.7013	82.2301	24.639	31.7545
Fkbp7	114.534	0.388392	-1.36442	0.366333	1.36703e-05	0.000233215	170.77	168.929	62.1842	56.2508
Bsg	24147.4	0.387685	-1.36704	0.168411	3.96828e-17	4.41314e-15	40134.1	29957.7	11684.8	14813
Cx3cl1	1703.61	0.3872	-1.36885	0.159207	6.92278e-19	9.22476e-17	2332.15	2611.7	863.539	1007.07
Filip1l	864.529	0.384872	-1.37755	0.226936	1.03531e-10	5.37309e-09	1050.34	1478.35	377.798	551.62
Cmtm7	561.839	0.383881	-1.38127	0.19962	4.09812e-13	3.02478e-11	827.105	812.469	275.722	332.061
Hr	48.9008	0.383809	-1.38154	0.584699	0.000961134	0.00898618	83.3277	67.0354	23.4657	21.7745
Pdgfrl	58.292	0.381921	-1.38866	0.544656	0.000613253	0.00622555	88.4714	90.2744	19.9459	34.4763
Fam20c	1446.86	0.380494	-1.39405	0.196124	9.68297e-14	8.04611e-12	2011.18	2221.11	620.669	934.488
H2afx	1017.08	0.379301	-1.39859	0.215519	6.97056e-12	4.42496e-10	1290.04	1692.87	437.636	647.791
Itga1	609.346	0.376743	-1.40835	0.246093	8.28769e-10	3.57385e-08	809.616	986.761	238.177	402.828
Acacb	33.2695	0.372325	-1.42537	0.757981	0.00255054	0.0197306	62.753	42.9027	12.9062	14.5163
Snn	533.57	0.370191	-1.43366	0.235525	9.07559e-11	4.82867e-09	845.622	732.921	218.231	337.505
Abca6	38.3461	0.369974	-1.43451	0.676507	0.00158557	0.0134782	65.8392	54.5221	17.5993	15.4236
Tnfrsf9	418.599	0.369327	-1.43703	0.236654	9.39076e-11	4.97845e-09	705.714	531.814	238.177	198.692
9930014A18Rik	252.158	0.368507	-1.44024	0.259125	2.07253e-09	8.36245e-08	388.863	359.31	124.368	136.091
Col27a1	820.656	0.364562	-1.45576	0.195424	7.35945e-15	6.71936e-13	1365.13	1061.84	396.571	459.079
Adamtsl4	162.268	0.362586	-1.46361	0.312649	2.0232e-07	5.58306e-06	229.408	256.522	83.3034	79.8398
Gsap	449.055	0.361793	-1.46676	0.207799	1.31399e-13	1.06787e-11	660.449	671.248	224.098	240.427
Tmem132a	292.791	0.356055	-1.48983	0.250955	2.19076e-10	1.05206e-08	468.075	407.575	134.928	160.587
Zmynd15	332.263	0.355987	-1.4901	0.249818	1.74881e-10	8.62222e-09	546.26	446.009	188.899	147.885
Zfp9	121.907	0.355761	-1.49102	0.378408	5.20908e-06	0.000101112	163.569	205.575	70.3972	48.0853
Nfkbiz	801.743	0.355688	-1.49131	0.177231	2.99604e-18	3.72391e-16	1225.23	1155.69	434.116	391.941
Zfp532	17.0198	0.354955	-1.49429	1.32256	0.0062626	0.0406629	30.8621	26.8142	5.86644	4.53635
Tex9	52.3361	0.351788	-1.50722	0.561529	0.000386213	0.00421274	92.5864	70.6106	23.4657	22.6818
Trpm6	18.1203	0.350516	-1.51245	1.27676	0.00597453	0.0393452	39.092	22.3451	4.69315	6.35089
Lfng	111.564	0.349292	-1.51749	0.399857	9.09075e-06	0.000164579	195.46	144.796	63.3575	42.6417
6330403L08Rik	158.126	0.347283	-1.52582	0.314752	8.71728e-08	2.56847e-06	242.782	235.965	73.9171	79.8398
Nid1	2478.56	0.345563	-1.53298	0.148039	2.96636e-26	7.19269e-24	3841.31	3559.13	1343.41	1170.38
Junb	1805.27	0.345152	-1.5347	0.196986	4.99348e-16	5.03524e-14	2176.81	3234.68	822.474	987.11
Sirt1	126.741	0.343849	-1.54015	0.359481	1.17695e-06	2.69501e-05	203.69	182.336	69.2239	51.7144
Hs3st1	827.198	0.342139	-1.54735	0.174472	5.53969e-20	8.11262e-18	1197.45	1282.61	425.903	402.828
Sphk1	495.748	0.340972	-1.55227	0.207145	4.26369e-15	4.12185e-13	804.473	688.23	241.697	248.592
Casp12	475.644	0.340353	-1.5549	0.209863	6.2435e-15	5.84479e-13	714.972	718.62	255.777	213.209
Npepl1	2261.16	0.339959	-1.55657	0.168925	2.3918e-21	3.8876e-19	3775.47	3014.81	1019.59	1234.79
Sox4	3118.39	0.339258	-1.55955	0.169312	2.421e-21	3.89229e-19	5381.33	3987.27	1461.92	1643.07
Krtcap3	55.5642	0.339041	-1.56047	0.577401	0.000343669	0.00380195	103.902	70.6106	30.5055	17.2381
Ppbp	27.6044	0.338039	-1.56474	0.86497	0.00265267	0.0204034	55.5518	34.8584	8.21301	11.7945
Rassf4	162.168	0.337991	-1.56494	0.357491	8.16796e-07	1.9361e-05	240.725	256.522	51.6246	99.7997
4933421A08Rik	20.6158	0.336781	-1.57012	1.06373	0.00424433	0.029937	33.9483	34.8584	8.21301	5.44362
R3hdml	410.947	0.332303	-1.58943	0.22728	1.90869e-13	1.51782e-11	695.426	550.584	201.805	195.97
Bcl3	584.014	0.331536	-1.59276	0.193924	1.56838e-17	1.77083e-15	836.363	930.452	289.802	279.439
Micall2	484.121	0.331403	-1.59334	0.207029	1.04233e-15	1.03471e-13	695.426	771.354	222.925	246.778
Ephx2	187.292	0.329351	-1.6023	0.312622	2.06766e-08	6.93485e-07	304.506	269.929	70.3972	104.336
Cp	7337.79	0.327386	-1.61094	0.397317	2.98025e-06	6.27934e-05	11088.8	11629.3	2445.13	4187.96
Tmem79	254.363	0.32499	-1.62153	0.257953	2.31252e-11	1.32575e-09	387.834	389.699	113.809	126.111
Gbp7	13.4742	0.324685	-1.62289	1.82881	0.00667405	0.0427527	20.5747	26.8142	4.69315	1.81454
Vcam1	3366.02	0.324512	-1.62366	0.19328	3.22455e-18	3.94168e-16	5502.72	4736.28	1255.42	1969.68
Gdpd5	702.647	0.322994	-1.63042	0.188528	3.78949e-19	5.14223e-17	1147.04	992.124	320.307	351.114
Dgka	66.3836	0.322228	-1.63385	0.482046	4.02165e-05	0.000608846	102.874	105.469	28.1589	29.0327
Nfkbia	1755.28	0.319518	-1.64603	0.15421	1.01696e-27	2.73488e-25	2821.83	2523.21	797.835	878.238
4930471E19Rik	119.578	0.318747	-1.64952	0.358697	2.72053e-07	7.26343e-06	181.058	189.487	55.1445	52.6217
Slit2	124.243	0.317367	-1.65578	0.37728	7.44334e-07	1.78146e-05	190.316	196.637	41.0651	68.9525
Klhl1	75.1741	0.315809	-1.66288	0.461283	1.76288e-05	0.000290042	122.42	113.513	37.5452	27.2181
Tle3	1334.64	0.305457	-1.71096	0.186318	3.03609e-21	4.82869e-19	1876.42	2238.98	520.939	702.227
Odaph	52.1527	0.30313	-1.72199	0.645202	0.000337473	0.0037418	104.931	63.4602	29.3322	10.8872
Cd14	2952.89	0.30237	-1.72561	0.151688	3.96782e-31	1.33382e-28	4652.98	4453.83	1213.18	1491.55
Atg9b	228.822	0.300344	-1.73531	0.291415	1.61454e-10	8.04061e-09	348.742	363.779	122.022	80.7471
Ccn1	1752.04	0.297942	-1.74689	1.11898	0.00283285	0.0215317	1234.48	4736.28	533.846	503.535
Tnfaip3	623.926	0.297896	-1.74712	0.199539	1.44499e-19	2.0163e-17	886.772	1049.33	259.296	300.306
Mfsd2a	217.853	0.292802	-1.772	0.281295	1.96618e-11	1.15404e-09	372.403	310.151	92.6897	96.1707
Stac	205.438	0.292331	-1.77433	0.294058	1.01349e-10	5.27834e-09	359.029	285.124	95.0363	82.5616
Cpne8	94.9195	0.292095	-1.77549	0.430931	2.30078e-06	4.94635e-05	130.65	171.611	29.3322	48.0853
Kalrn	335.942	0.291374	-1.77905	0.258485	4.11048e-13	3.02478e-11	544.202	508.575	114.982	176.01
Plekho1	84.9778	0.290251	-1.78463	0.445064	3.36986e-06	6.97113e-05	147.109	123.345	42.2383	27.2181
Pik3ip1	143.52	0.289895	-1.7864	0.343777	1.31189e-08	4.57645e-07	247.926	205.575	51.6246	68.9525
Vash2	269.684	0.289289	-1.78942	0.262226	5.61973e-13	4.0547e-11	403.265	441.54	131.408	102.522
Gm47547	114.891	0.287636	-1.79768	0.384103	1.66694e-07	4.68739e-06	171.799	192.168	57.4911	38.1054
Pou2f2	81.2095	0.28718	-1.79997	0.441178	2.60629e-06	5.56273e-05	144.023	115.301	32.852	32.6617
Zfpm2	890.282	0.285409	-1.8089	0.173286	1.15185e-26	2.93741e-24	1332.21	1451.54	375.452	401.921
Pik3r5	278.719	0.282647	-1.82293	0.256633	7.68e-14	6.45425e-12	431.041	446.009	132.581	105.243
Igfbp7	4040.47	0.280307	-1.83492	0.194551	2.6188e-22	4.72374e-20	6116.87	6582.88	1316.43	2145.69
Ccl20	467.042	0.278779	-1.84281	0.216958	1.4589e-18	1.89286e-16	762.294	709.682	174.82	221.374
Pros1	14.6862	0.278425	-1.84464	1.48027	0.00515674	0.0350682	22.6322	29.4956	1.17329	5.44362
Stc2	13.5426	0.278065	-1.8465	1.50098	0.00514363	0.0350112	24.6897	23.2389	3.51986	2.72181
Fxyd5	83.4368	0.275045	-1.86226	0.435947	1.09176e-06	2.51139e-05	135.793	132.283	37.5452	28.1254
2610307P16Rik	43.4531	0.273472	-1.87054	0.622403	0.000133278	0.0017277	75.0978	67.9292	11.7329	19.0527
Ctxn1	205.241	0.27068	-1.88534	0.298747	1.83377e-11	1.08493e-09	288.046	366.46	73.9171	92.5416
C2cd4c	162.044	0.269958	-1.88919	0.346219	3.1588e-09	1.23276e-07	240.725	278.867	46.9315	81.6543
Tmem44	66.8757	0.268051	-1.89942	0.524016	1.60427e-05	0.000268121	120.362	98.3186	15.2527	33.569
Gm42793	42.0827	0.267842	-1.90054	0.626162	0.00011802	0.00156559	77.1553	61.6726	14.0794	15.4236
Sbk1	352.592	0.266519	-1.90769	0.230898	9.70953e-18	1.11328e-15	563.748	558.628	133.755	154.236
Gadd45g	73.9328	0.263702	-1.92302	0.510541	8.80076e-06	0.000160508	81.2703	159.991	28.1589	26.3108
Fbp2	114.093	0.259934	-1.94378	0.40384	9.15412e-08	2.68116e-06	158.426	211.832	31.6788	54.4362
Ypel1	144.971	0.254278	-1.97552	0.339116	3.53437e-10	1.63877e-08	259.242	210.044	51.6246	58.9726
Pdgfa	310.749	0.25266	-1.98473	0.246756	5.50925e-17	5.99172e-15	544.202	455.841	123.195	119.76
Cdc42ep1	1041.46	0.249772	-2.00131	0.192216	1.5369e-26	3.85292e-24	1642.89	1708.06	336.733	478.131
Ccl7	19.5916	0.249388	-2.00353	1.04706	0.00187363	0.0153803	41.1495	26.8142	5.86644	4.53635
Gm49708	23.041	0.248537	-2.00847	0.982776	0.00140684	0.0122764	53.4943	25.9204	8.21301	4.53635
Ddah2	173.475	0.24834	-2.00961	0.307327	3.88911e-12	2.55661e-10	295.248	267.248	63.3575	68.0453
Megf6	25.0055	0.24634	-2.02128	1.00983	0.00160923	0.01362	50.4081	36.646	1.17329	11.7945
Sprr2h	38.5519	0.246317	-2.02141	0.702957	0.000173061	0.00215467	73.0404	56.3097	17.5993	7.25816
Oca2	20.5118	0.245737	-2.02481	1.00712	0.00161324	0.0136429	39.092	32.177	3.51986	7.25816
C1qtnf1	94.6442	0.244363	-2.0329	0.424268	9.98026e-08	2.88881e-06	142.994	168.035	25.8123	41.7344
Rasal1	17.4726	0.244113	-2.03438	1.17892	0.00251806	0.0195307	38.0633	23.2389	5.86644	2.72181
Anks1b	52.3532	0.241945	-2.04725	0.571158	1.79217e-05	0.000294109	98.7588	75.9735	12.9062	21.7745
Gbp6	24.7454	0.239216	-2.06361	0.875288	0.000756727	0.00744198	43.207	42.0089	4.69315	9.0727
Nectin1	233.192	0.237208	-2.07578	0.277695	5.07e-15	4.80708e-13	359.029	402.212	76.2637	95.2634
Mex3a	610.763	0.235445	-2.08654	0.191465	7.40644e-29	2.14801e-26	1005.08	980.505	237.004	220.467
Cd109	109.603	0.235226	-2.08788	0.45929	3.20424e-07	8.4632e-06	142.994	220.77	21.1192	53.529
Nutm1	29.3028	0.232773	-2.103	0.773785	0.000295108	0.00335506	48.3507	51.8407	7.03972	9.97997
1700001C19Rik	23.4382	0.230806	-2.11525	0.944703	0.0009375	0.00879858	26.7472	54.5221	7.03972	5.44362
Twist1	102.761	0.229505	-2.1234	0.397095	5.34362e-09	2.00603e-07	153.282	186.805	32.852	38.1054
Hist1h2bc	293.625	0.22909	-2.12601	0.30375	1.66522e-13	1.33136e-11	543.173	423.664	71.5705	136.091
Nrp1	101.339	0.228887	-2.12729	0.404755	8.86597e-09	3.19067e-07	148.138	187.699	30.5055	39.0126
Ppil6	18.5825	0.22665	-2.14146	1.05747	0.00154813	0.0132437	34.9771	30.3894	3.51986	5.44362
Adgrg6	664.066	0.224773	-2.15346	0.204259	3.74585e-27	9.72016e-25	1044.17	1136.03	202.979	273.088
Hspa12a	349.4	0.224492	-2.15527	0.299402	3.98194e-14	3.38487e-12	594.61	559.522	77.437	166.03
Flywch2	43.978	0.222302	-2.16941	0.633498	3.18871e-05	0.000499622	77.1553	72.3982	8.21301	18.1454
Gm4544	53.1332	0.221721	-2.17318	0.667949	5.61979e-05	0.000810158	102.874	78.6549	4.69315	26.3108
Fkbp1b	33.6388	0.220938	-2.17829	0.753868	0.000162093	0.00203698	52.4656	62.5664	14.0794	5.44362
Adam22	36.0779	0.218733	-2.19276	0.685613	6.80838e-05	0.00095725	61.7242	61.6726	8.21301	12.7018
Gbp2	139.761	0.218551	-2.19396	0.340449	7.1003e-12	4.48806e-10	221.179	243.115	45.7582	48.9926
Prune2	43.8021	0.218399	-2.19496	0.616305	1.87108e-05	0.000305128	63.7817	84.9115	12.9062	13.6091
Gm19385	46.8357	0.216899	-2.20491	0.651669	3.56613e-05	0.000547164	102.874	57.2036	8.21301	19.0527
Zkscan7	20.7773	0.21667	-2.20643	0.989318	0.000975314	0.00907287	45.2644	27.708	4.69315	5.44362
Rhob	918.467	0.214354	-2.22193	0.192917	7.29709e-32	2.56979e-29	1573.97	1464.95	267.509	367.444
D630003M21Rik	515.841	0.214306	-2.22226	0.223759	1.69575e-24	3.74357e-22	922.777	787.443	149.007	204.136
Nrep	22.3776	0.214155	-2.22327	0.923152	0.000640462	0.00645304	44.2357	33.9646	5.86644	5.44362
Cxxc4	162.48	0.210606	-2.24738	0.37944	1.97095e-10	9.52692e-09	314.794	230.602	32.852	71.6744
Hspa1b	64.3493	0.204969	-2.28652	0.624135	1.22239e-05	0.000211963	53.4943	167.142	14.0794	22.6818
Dmxl2	27.3584	0.203972	-2.29356	0.817978	0.000226825	0.00270562	39.092	56.3097	5.86644	8.16543
Mical1	82.3608	0.201399	-2.31187	0.445039	1.21888e-08	4.28231e-07	132.707	146.584	21.1192	29.0327
Col6a1	245.5	0.198033	-2.33619	0.282622	9.02719e-18	1.04313e-15	447.501	378.974	65.7041	89.8198
Rnf32	21.7469	0.195784	-2.35267	0.935926	0.000499194	0.00528531	33.9483	42.9027	4.69315	5.44362
Parvaos	15.2637	0.195698	-2.3533	1.21564	0.00186504	0.0153423	24.6897	30.3894	2.34657	3.62908
Fbln1	347.572	0.195058	-2.35802	0.24397	2.61622e-23	5.15954e-21	521.57	648.009	109.116	111.594
Csf1	2589.85	0.190864	-2.38938	0.158327	1.00385e-52	9.89862e-50	4097.46	4619.19	906.951	735.796
Slc43a2	328.163	0.1901	-2.39517	0.275531	2.37085e-19	3.24697e-17	591.524	520.195	73.9171	127.018
Syt17	49.0216	0.18564	-2.42942	0.584341	1.7161e-06	3.80553e-05	73.0404	96.531	12.9062	13.6091
Prss22	108.989	0.185399	-2.43129	0.440001	1.60175e-09	6.54462e-08	217.064	155.522	43.4116	19.9599
C3	2157.63	0.184547	-2.43794	0.506656	6.9142e-08	2.09137e-06	3459.64	3969.39	401.264	800.212
Cdh9	40.7821	0.183478	-2.44632	0.640145	6.98379e-06	0.000130426	66.8679	75.0797	9.3863	11.7945
Tenm4	454.428	0.182849	-2.45128	0.23593	1.57089e-26	3.8725e-24	657.363	885.761	146.661	127.925
Slc36a4	39.8966	0.180746	-2.46797	0.646763	6.95794e-06	0.000130263	72.0116	67.0354	10.5596	9.97997
Gbp3	42.8429	0.180494	-2.46998	0.623731	4.02809e-06	8.12817e-05	75.0978	74.1859	9.3863	12.7018
Rdh10	5227.89	0.178595	-2.48524	0.496588	2.57646e-08	8.43108e-07	9818.27	8245.36	1880.78	967.15
Phex	21.4443	0.178363	-2.48711	0.953016	0.000383711	0.00418854	45.2644	31.2832	4.69315	4.53635
Ripply1	41.9731	0.177392	-2.49498	0.67396	1.10288e-05	0.000194431	93.6151	53.6283	7.03972	13.6091
Sprr1a	2609.18	0.176556	-2.5018	0.419877	1.29864e-10	6.5557e-09	5087.11	3901.46	540.885	907.27
Pf4	26.3586	0.175988	-2.50645	0.849816	0.00015101	0.00192054	40.1208	53.6283	3.51986	8.16543
Apol7d	11.185	0.175379	-2.51145	1.64232	0.00373665	0.0270131	16.4598	25.0266	2.34657	0.90727
Pmepa1	751.249	0.163179	-2.61547	0.192136	1.72787e-43	1.06487e-40	1333.24	1255.8	229.964	185.99
Rnf43	281.981	0.159003	-2.65288	0.261402	2.21521e-25	5.11956e-23	473.219	505	68.0507	81.6543
Mefv	36.1295	0.157035	-2.67084	0.691168	5.97865e-06	0.000114104	65.8392	62.5664	7.03972	9.0727
Ak4	274.802	0.15523	-2.68752	0.288195	5.32946e-22	9.3843e-20	469.104	486.23	90.3431	53.529
Nostrin	65.8968	0.153966	-2.69931	0.505501	5.36682e-09	2.00964e-07	126.535	105.469	15.2527	16.3309
Duoxa1	18.0834	0.153882	-2.7001	1.13597	0.000686605	0.00684799	47.3219	18.7699	3.51986	2.72181
Gatm	514.827	0.153841	-2.70049	0.229151	2.2829e-33	8.88588e-31	969.071	820.513	157.22	112.502
Nepn	49.2443	0.153055	-2.70787	0.589663	2.351e-07	6.38047e-06	80.2415	93.8496	12.9062	9.97997
Vnn3	211.8	0.151825	-2.71952	0.318022	8.38966e-19	1.10796e-16	398.121	343.221	38.7185	67.138
Casd1	57.0536	0.149565	-2.74115	0.603208	2.52108e-07	6.8046e-06	115.219	86.6991	19.9459	6.35089
Ramp1	85.1394	0.149432	-2.74244	0.478961	5.49786e-10	2.4347e-08	189.288	110.832	22.2925	18.1454
P3h4	471.798	0.149408	-2.74268	0.233792	6.15798e-33	2.27707e-30	884.714	764.204	98.5561	139.72
Pglyrp1	122.848	0.147665	-2.7596	0.396125	2.10225e-13	1.62797e-11	246.897	185.912	22.2925	36.2908
Pnp2	36.5711	0.14747	-2.76151	0.696371	3.74754e-06	7.6455e-05	61.7242	68.823	9.3863	6.35089
C4b	24.6475	0.146933	-2.76677	0.905274	0.000102229	0.00137712	31.8909	57.2036	5.86644	3.62908
Fcgbp	31.8377	0.146519	-2.77084	0.760837	1.45704e-05	0.000246333	48.3507	66.1416	4.69315	8.16543
Gpm6b	1220.77	0.146457	-2.77145	0.188915	7.01425e-50	6.10281e-47	2128.46	2142.45	251.083	361.094
Hmgcs2	51.82	0.145666	-2.77926	0.597015	1.94146e-07	5.3675e-06	80.2415	104.575	7.03972	15.4236
Thsd7a	68.1861	0.143699	-2.79888	0.509084	2.14969e-09	8.64023e-08	139.908	101.894	16.426	14.5163
Heca	282.558	0.142659	-2.80936	0.262909	7.94804e-28	2.17703e-25	488.65	505	62.1842	74.3962
2210016F16Rik	22.4369	0.142582	-2.81014	0.9419	0.000137423	0.00177212	50.4081	31.2832	3.51986	4.53635
Kirrel3	564.458	0.141181	-2.82438	0.221609	2.40913e-38	1.22874e-35	1033.88	951.903	111.462	160.587
Chd7	151.963	0.140845	-2.82782	0.352862	7.68137e-17	8.17375e-15	273.644	263.673	26.9856	43.549
Zc3h12a	561.856	0.140341	-2.83299	0.204182	5.88518e-45	3.95672e-42	994.789	981.398	127.888	143.349
Jun	662.469	0.137276	-2.86485	0.539386	5.11407e-09	1.94954e-07	832.249	1532.88	111.462	173.289
Gm9761	45.7954	0.137189	-2.86576	0.631477	3.43566e-07	8.99414e-06	76.1266	88.4867	5.86644	12.7018
Anxa10	297.758	0.136344	-2.87468	0.294785	8.63037e-24	1.8236e-21	614.156	437.965	84.4767	54.4362
Sema3a	64.7462	0.135629	-2.88227	0.546821	6.64327e-09	2.45651e-07	111.104	119.77	19.9459	8.16543
Clca3a1	254.162	0.131726	-2.92439	0.314269	6.01154e-22	1.04608e-19	495.851	405.788	75.0904	39.9199
Prex2	21.7799	0.131708	-2.92459	1.0035	0.000167563	0.00209569	23.661	56.3097	3.51986	3.62908
Nectin3	165.706	0.130047	-2.9429	0.331051	3.59243e-20	5.36723e-18	304.506	285.124	38.7185	34.4763
Pcdhgb8	24.4436	0.126074	-2.98766	0.922316	6.16246e-05	0.000877276	29.8334	59.885	3.51986	4.53635
Hist1h1c	1703.54	0.123938	-3.01231	0.41672	2.44582e-14	2.12801e-12	3703.45	2409.7	282.762	418.252
Gda	22.1309	0.12201	-3.03493	0.948217	7.5405e-05	0.0010502	43.207	38.4336	2.34657	4.53635
Lipo3	62.9679	0.120512	-3.05275	0.529307	5.15814e-10	2.30496e-08	114.19	113.513	10.5596	13.6091
Cldn18	221.907	0.119987	-3.05905	0.300252	1.23756e-25	2.90552e-23	428.983	366.46	50.4513	41.7344
Podxl	1100.31	0.119744	-3.06198	0.219183	1.01539e-45	8.34367e-43	1817.78	2119.21	290.975	173.289
Shc2	290.735	0.119188	-3.06869	0.275497	5.20246e-30	1.63722e-27	586.38	456.735	56.3178	63.5089
Gpc1	430.85	0.117622	-3.08777	0.238474	1.1367e-39	6.22704e-37	738.633	806.213	103.249	75.3034
Gstm4	35.0555	0.11693	-3.09628	0.726056	1.2253e-06	2.79683e-05	64.8105	63.4602	4.69315	7.25816
Fabp5	144.844	0.114289	-3.12924	0.357078	1.13048e-19	1.60778e-17	263.357	259.204	30.5055	26.3108
Macc1	154.277	0.114271	-3.12947	0.357254	1.0284e-19	1.4768e-17	295.248	260.991	36.3719	24.4963
Wipf1	145.972	0.114077	-3.13192	0.359632	1.7187e-19	2.37582e-17	266.443	260.097	32.852	24.4963
Cxcl3	1402.2	0.113998	-3.13292	0.590983	5.14338e-09	1.95567e-07	2860.92	2244.35	156.047	347.485
Dram1	329.497	0.113854	-3.13475	0.254607	4.53309e-36	1.97203e-33	629.587	556.841	68.0507	63.5089
Col6a2	98.9175	0.113322	-3.14149	0.453648	2.9123e-13	2.19774e-11	215.006	143.903	14.0794	22.6818
A830082K12Rik	23.2364	0.112677	-3.14973	0.953002	5.56887e-05	0.000804387	38.0633	48.2655	1.17329	5.44362
Fn1	6100.48	0.111513	-3.16472	0.133104	2.92706e-126	1.08235e-122	10935.5	11034	1276.54	1155.86
Dip2c	10.6482	0.111436	-3.16571	1.66713	0.0028761	0.0218438	24.6897	16.0885	0	1.81454
Mbnl3	100.496	0.109134	-3.19583	0.430089	6.774e-15	6.23544e-13	200.604	164.46	18.7726	18.1454
Arhgdig	66.9946	0.107978	-3.21119	0.556189	3.82343e-10	1.75337e-08	129.621	114.407	17.5993	6.35089
Gm50321	64.6148	0.101682	-3.29787	0.538274	5.83336e-11	3.20748e-09	130.65	106.363	10.5596	10.8872
Gm47163	42.9579	0.0999158	-3.32314	0.667431	4.03533e-08	1.28635e-06	69.9541	88.4867	7.03972	6.35089
Atp8a1	106.527	0.0986445	-3.34162	0.446427	4.72702e-15	4.51079e-13	150.196	240.434	16.426	19.0527
Gm6166	69.4657	0.0981992	-3.34815	0.517617	6.48893e-12	4.13697e-10	126.535	128.708	11.7329	10.8872
Zfp13	17.6537	0.096322	-3.37599	1.22433	0.00033276	0.00369786	47.3219	19.6637	0	3.62908
Clca3a2	11.5083	0.0936949	-3.41589	1.55395	0.00174742	0.0145554	23.661	20.5575	0	1.81454
Enpp2	590.188	0.0894317	-3.48307	0.262946	3.98433e-41	2.26663e-38	1233.46	940.283	64.5308	122.481
Cdh13	527.573	0.0874932	-3.51469	0.226865	1.70976e-55	2.10742e-52	948.496	993.912	96.2095	71.6744
Gm47604	31.8883	0.0872259	-3.5191	0.806231	8.35186e-07	1.96763e-05	50.4081	68.823	4.69315	3.62908
Nhsl1	59.8244	0.0856541	-3.54533	0.588996	1.01211e-10	5.27834e-09	119.334	102.788	11.7329	5.44362
Cpe	1998.44	0.0856328	-3.54569	0.156387	5.97984e-115	1.76896e-111	3739.46	3630.64	289.802	333.875
Rnf125	25.8621	0.0855849	-3.5465	0.91977	7.46507e-06	0.000138713	59.6668	37.5398	3.51986	2.72181
Kcnh2	28.6036	0.0842962	-3.56839	0.872791	3.26777e-06	6.77891e-05	58.638	49.1593	1.17329	5.44362
Ccl2	997.817	0.0806792	-3.63166	0.201128	3.14188e-74	5.80894e-71	2085.25	1611.53	158.394	136.091
Rgs16	30.6	0.0792052	-3.65826	0.838532	9.31224e-07	2.16909e-05	47.3219	67.9292	3.51986	3.62908
Sfmbt2	16.2295	0.0790228	-3.66159	1.26125	0.000273533	0.00315341	38.0633	24.1327	0	2.72181
Trp63	20.5018	0.0775581	-3.68858	1.07328	4.13307e-05	0.000621119	48.3507	29.4956	2.34657	1.81454
Tff2	368.022	0.0751763	-3.73358	0.651344	4.61438e-10	2.07451e-08	642.961	740.071	24.639	64.4162
P2ry6	20.4564	0.0750898	-3.73524	1.06366	3.55582e-05	0.000546421	42.1782	35.7522	1.17329	2.72181
Ckap4	47.9463	0.074911	-3.73868	0.677714	2.20107e-09	8.82276e-08	77.1553	102.788	8.21301	3.62908
Cebpd	72.7258	0.0748832	-3.73921	0.534782	2.04333e-13	1.59165e-11	121.391	151.053	9.3863	9.0727
Hip1	39.313	0.074305	-3.7504	0.742245	3.49192e-08	1.12771e-06	60.6955	87.5929	3.51986	5.44362
Col8a1	54.7439	0.0729788	-3.77638	0.622015	1.08589e-10	5.61589e-09	113.161	92.9558	4.69315	8.16543
Acer2	28.9028	0.072213	-3.7916	0.883967	1.43393e-06	3.2184e-05	65.8392	43.7965	2.34657	3.62908
Ptprg	94.2851	0.0720144	-3.79557	0.471396	6.36841e-17	6.87556e-15	188.259	165.354	11.7329	11.7945
Il13ra2	34.048	0.0711457	-3.81308	0.829477	2.96993e-07	7.88658e-06	82.299	46.4779	4.69315	2.72181
Trim36	17.9814	0.0707264	-3.82161	1.17633	8.80659e-05	0.00120498	32.9196	35.7522	2.34657	0.90727
Irf6	62.5211	0.0703372	-3.82957	0.594535	7.52636e-12	4.71705e-10	115.219	119.77	10.5596	4.53635
Hoxb3	14.8961	0.0700396	-3.83569	1.44619	0.000520127	0.00544844	41.1495	16.0885	2.34657	0
2010300C02Rik	39.2436	0.0694993	-3.84686	0.769091	3.6287e-08	1.16933e-06	73.0404	75.0797	7.03972	1.81454
Spry3	30.8093	0.0656938	-3.9281	0.884388	8.07098e-07	1.91618e-05	44.2357	73.2921	1.17329	4.53635
3110009F21Rik	19.6848	0.0656733	-3.92855	1.21773	8.66533e-05	0.00118895	57.6093	17.8761	2.34657	0.90727
Fyn	32.0943	0.0630901	-3.98644	0.859382	3.158e-07	8.35598e-06	47.3219	75.0797	2.34657	3.62908
Zfp760	69.4787	0.0617479	-4.01747	0.580413	3.21625e-13	2.4026e-11	152.253	110.832	9.3863	5.44362
Crtap	61.4866	0.0610706	-4.03338	0.617612	4.49875e-12	2.93132e-10	113.161	119.77	9.3863	3.62908
Gm11884	49.2738	0.0577436	-4.11419	0.686828	1.80464e-10	8.85539e-09	94.6438	92.9558	5.86644	3.62908
Hoxb6	31.5325	0.0564023	-4.1481	0.904535	3.56401e-07	9.26456e-06	53.4943	67.0354	4.69315	0.90727
Nr2f1	109.395	0.0550963	-4.1819	0.46883	4.70963e-20	6.96601e-18	183.115	233.283	9.3863	11.7945
Ly6d	50.5616	0.0548294	-4.18891	0.683371	9.45555e-11	4.9949e-09	103.902	89.3806	3.51986	5.44362
Map2	21.3215	0.0544498	-4.19893	1.13316	2.19661e-05	0.000353922	27.7759	54.5221	1.17329	1.81454
Mylk3	21.0696	0.0540212	-4.21033	1.1418	2.59444e-05	0.000412627	49.3794	32.177	0	2.72181
Gm49980	226.654	0.053337	-4.22872	0.751204	8.65886e-10	3.71227e-08	370.345	497.85	9.3863	29.0327
Ptp4a3	324.046	0.0528736	-4.24131	0.304149	1.60946e-45	1.19028e-42	691.311	540.752	38.7185	25.4036
Gja1	374.644	0.051616	-4.27604	0.271877	6.71849e-57	9.03393e-54	693.369	732.921	38.7185	33.569
Slc35g2	37.3074	0.0511587	-4.28888	0.839989	4.16661e-08	1.32534e-06	74.0691	69.7168	0	5.44362
Nos2	132.828	0.0511098	-4.29026	1.29009	2.4077e-05	0.000385414	261.299	252.947	15.2527	1.81454
Kcnab2	63.424	0.0426061	-4.5528	0.644232	2.02462e-13	1.59165e-11	119.334	125.133	4.69315	4.53635
Zfp647	19.5104	0.040906	-4.61154	1.25626	4.27522e-05	0.000637447	36.0058	40.2212	0	1.81454
Mex3b	118.847	0.0408005	-4.61527	0.480136	8.06804e-23	1.51056e-20	246.897	210.938	9.3863	8.16543
Ube2e2	138.228	0.0401605	-4.63808	0.454088	2.97714e-25	6.77461e-23	284.96	248.478	5.86644	13.6091
Plet1	29.1279	0.0386887	-4.69194	1.06261	1.12628e-06	2.58677e-05	70.9829	42.0089	3.51986	0
Prickle1	20.8848	0.0374068	-4.74055	1.23581	2.49416e-05	0.000397533	37.0345	44.6903	0	1.81454
Plaat3	36.1056	0.0370593	-4.75402	0.911073	2.7875e-08	9.10154e-07	81.2703	58.9912	2.34657	1.81454
Cxcl5	12664.2	0.0365479	-4.77407	0.506635	2.06068e-22	3.7629e-20	29635.9	19359.8	599.55	1061.51
Car9	673.254	0.0357502	-4.80591	0.52498	2.25399e-21	3.70431e-19	1471.09	1135.13	58.6644	28.1254
Enah	311.034	0.0335317	-4.89833	0.909973	3.20704e-09	1.2483e-07	592.553	619.407	5.86644	26.3108
Cxcl1	1672.8	0.0333594	-4.90576	0.201754	6.4042e-132	3.15749e-128	3726.09	2751.13	111.462	102.522
Pate14	39.1127	0.0331229	-4.91603	0.896288	8.40268e-09	3.04618e-07	86.4139	66.1416	1.17329	2.72181
Lrp12	60.2978	0.0294607	-5.08506	0.744749	2.34402e-12	1.57592e-10	114.19	121.558	0	5.44362
Gm17552	43.6154	0.0291358	-5.10106	0.872919	1.27585e-09	5.28602e-08	87.4427	83.1239	1.17329	2.72181
D16Ertd472e	61.9865	0.0290661	-5.10452	0.726659	4.93527e-13	3.61374e-11	127.563	114.407	2.34657	3.62908
Tm4sf20	219.115	0.0272919	-5.19538	0.40316	1.32239e-38	6.98552e-36	457.788	396.85	8.21301	13.6091
Nfatc2	17.6182	0.0265513	-5.23507	1.51993	0.000154314	0.00195416	32.9196	36.646	0	0.90727
Tiam1	18.5795	0.0247211	-5.33811	1.50494	0.000115311	0.00153654	34.9771	38.4336	0	0.90727
Csf3	44.875	0.022505	-5.47361	0.959006	2.78392e-09	1.09513e-07	94.6438	81.3363	3.51986	0
Bcl7a	56.8278	0.0219087	-5.51235	0.83597	1.38138e-11	8.30567e-10	120.362	102.788	2.34657	1.81454
Tnip3	85.9415	0.0205502	-5.6047	0.693351	1.93861e-16	1.99125e-14	188.259	149.266	3.51986	2.72181
Cxcl2	151.946	0.0202937	-5.62283	0.523497	1.58849e-27	4.19559e-25	313.765	282.443	7.03972	4.53635
Nox1	22.6217	0.0202275	-5.62754	1.49092	4.97882e-05	0.000731298	26.7472	62.5664	1.17329	0
Lin28b	23.1404	0.019284	-5.69645	1.45593	3.44717e-05	0.00053278	49.3794	42.0089	1.17329	0
Gm33782	22.6818	0.0191014	-5.71018	1.45773	3.73136e-05	0.000569562	44.2357	45.5841	0	0.90727
Akap11	135.512	0.0190351	-5.71519	0.575119	5.29604e-24	1.13527e-21	246.897	285.124	8.21301	1.81454
2310057J18Rik	312.45	0.0181263	-5.78577	0.385548	1.96692e-51	1.81829e-48	635.76	592.593	10.5596	10.8872
Itln1	118.476	0.0169201	-5.88511	0.6416	1.72305e-20	2.62738e-18	280.845	185.912	3.51986	3.62908
Cnksr2	105.723	0.0164243	-5.92803	0.67188	4.95766e-19	6.66625e-17	219.121	197.531	3.51986	2.72181
Vtcn1	10.0596	0.0159563	-5.96973	2.80586	0.000175568	0.00217098	20.5747	19.6637	0	0
Nkain1	136.685	0.0145456	-6.10327	0.6181	2.48382e-23	4.96462e-21	268.5	270.823	4.69315	2.72181
Ripk3	10.6288	0.0145115	-6.10666	2.79673	0.000131021	0.00170593	17.4885	25.0266	0	0
Nts	10.7637	0.0141408	-6.14399	2.7894	0.000117536	0.00156197	21.6035	21.4513	0	0
Foxp2	108.112	0.0133272	-6.22948	0.715773	2.7176e-18	3.40645e-16	221.179	206.469	1.17329	3.62908
Mks1	11.6238	0.0124089	-6.33248	2.77756	7.48845e-05	0.00104394	20.5747	25.9204	0	0
Vangl2	11.7377	0.0124079	-6.3326	2.78913	7.94081e-05	0.00109462	30.8621	16.0885	0	0
Tcaf1	33.6048	0.0122453	-6.35163	1.40544	4.03473e-06	8.13048e-05	82.299	50.9469	1.17329	0
Mfsd1	103.736	0.0113842	-6.45682	0.778413	9.83986e-17	1.03958e-14	201.633	209.15	2.34657	1.81454
Tmem238l	131.814	0.0109756	-6.50956	0.708739	2.97563e-20	4.49107e-18	299.363	222.558	3.51986	1.81454
Rspo3	12.7073	0.0107667	-6.53728	2.77257	4.55758e-05	0.00067614	19.546	31.2832	0	0
Pak3	12.6862	0.0107386	-6.54105	2.76506	4.29872e-05	0.000640306	25.7184	25.0266	0	0
Mug1	13.3987	0.0101624	-6.62061	2.79665	4.36371e-05	0.000648028	13.3736	40.2212	0	0
2810429I04Rik	13.3693	0.00996493	-6.64892	2.76809	3.35125e-05	0.000520675	32.9196	20.5575	0	0
Lifr	13.6896	0.00973031	-6.6833	2.78621	3.49166e-05	0.00053853	15.4311	39.3274	0	0
Neto2	124.344	0.00939582	-6.73377	0.768347	2.27472e-18	2.90046e-16	230.437	262.779	2.34657	1.81454
Saa3	98.3624	0.00920708	-6.76304	0.87426	1.49577e-14	1.33277e-12	217.064	173.398	1.17329	1.81454
Arhgef9	14.1282	0.00906103	-6.78611	2.75779	2.17277e-05	0.000350463	28.8046	27.708	0	0
Prl2c3	74.7945	0.00892677	-6.80765	1.07577	2.10668e-10	1.01498e-08	211.92	84.9115	2.34657	0
Cand2	15.022	0.00824699	-6.92192	2.75608	1.46257e-05	0.000246951	28.8046	31.2832	0	0
Bcat1	362.014	0.00750841	-7.05728	0.498894	1.85078e-45	1.30356e-42	709.829	727.558	7.03972	3.62908
Prkaa2	51.3376	0.00743598	-7.07126	1.35638	2.4006e-07	6.49128e-06	91.5576	112.619	1.17329	0
Clca3b	1635.7	0.00672995	-7.21519	0.273398	2.04711e-154	1.51394e-150	3023.46	3475.12	26.9856	17.2381
Eif4e3	97.7265	0.0064681	-7.27244	1.01807	2.5333e-12	1.69548e-10	184.144	204.681	1.17329	0.90727
Fgf13	17.9732	0.00633506	-7.30243	2.75763	4.45882e-06	8.8169e-05	37.0345	34.8584	0	0
Hmgcll1	63.131	0.00582067	-7.4246	1.342	5.89948e-08	1.82169e-06	119.334	132.283	0	0.90727
Fam20a	20.2078	0.00536477	-7.54227	2.76429	2.03032e-06	4.43582e-05	37.0345	43.7965	0	0
Fcrl1	20.3216	0.00534449	-7.54773	2.76678	2.04685e-06	4.46534e-05	47.3219	33.9646	0	0
Lcn2	1134.92	0.00531529	-7.55563	0.340383	1.191e-109	2.93602e-106	2227.22	2288.14	15.2527	9.0727
Pard3b	75.4747	0.00486566	-7.68315	1.34445	2.11791e-08	7.07133e-07	112.132	188.593	1.17329	0
Prl2c2	352.911	0.00397263	-7.97569	0.688148	9.42786e-31	3.09883e-28	902.203	504.106	3.51986	1.81454
Hs3st3b1	26.1314	0.00378069	-8.04713	2.78619	3.39261e-07	8.89719e-06	47.3219	57.2036	0	0
Tdrkh	26.279	0.00375986	-8.0551	2.78705	3.31226e-07	8.70189e-06	58.638	46.4779	0	0
Trpa1	110.178	0.00321378	-8.28151	1.32098	1.20298e-09	5.0122e-08	223.236	216.301	1.17329	0
Klhl34	31.7093	0.00293285	-8.41348	2.80771	8.33895e-08	2.46683e-06	60.6955	66.1416	0	0
Dcp1b	42.6036	0.00202109	-8.95065	2.85365	1.11156e-08	3.93328e-07	65.8392	104.575	0	0
Mmp15	69.3422	0.00110963	-9.8157	2.9256	2.4158e-10	1.14894e-08	131.678	145.69	0	0
Clmn	74.528	0.00101883	-9.93886	2.93573	1.39329e-10	7.00957e-09	139.908	158.204	0	0
Cmtm8	117.655	0.000594643	-10.7157	3.0118	3.91536e-12	2.56248e-10	248.954	221.664	0	0

## Sheet: DESeq2LFCshrink_sgSCAF1_1_S_vs_
Gene	baseMean	Fold_Change	log2FoldChange	lfcSE	pvalue	padj	...sgLUC_1_S1.sorted.bam	...sgLUC_2_S2.sorted.bam	...sgSCAF1_1_S5.sorted.bam	...sgSCAF1_2_S6.sorted.bam
Gda	1090.42	45.6877	5.51373	0.208356	3.59537e-155	5.28842e-151	49.1584	43.5824	2033.54	2235.39
Car9	769.804	0.0405485	-4.62421	0.210964	1.34179e-107	9.86822e-104	1673.73	1287.2	62.966	55.3221
Clca3b	2138.38	0.160392	-2.64032	0.132502	1.37859e-89	6.75923e-86	3439.92	3940.66	623.452	549.471
Slc16a2	1025.85	6.88978	2.78446	0.153833	1.98219e-74	7.289e-71	246.962	267.576	1890.75	1698.11
Xlr	531.009	13.361	3.73995	0.210615	1.06132e-71	3.1222e-68	74.908	70.9481	921.433	1056.75
Cfh	446.651	23.6184	4.56184	0.259459	5.78543e-70	1.4183e-66	25.7496	44.596	812.351	903.908
B4galt4	352.076	0.0327518	-4.93228	0.286493	2.95668e-67	6.21284e-64	654.275	710.495	25.7185	17.8156
P3h4	516.95	0.105649	-3.24265	0.20134	1.29445e-59	2.38001e-56	1006.58	866.581	88.6846	105.956
C3	9177.73	3.32077	1.73152	0.108638	2.2548e-58	3.6851e-55	3936.18	4501.15	14543.4	13730.2
Bcat1	410.843	0.00696134	-7.16642	0.452167	2.60066e-56	3.82531e-53	807.602	825.025	8.86846	1.87533
Ak4	282.479	0.0423086	-4.56291	0.29472	4.55237e-55	6.08735e-52	533.72	551.368	19.5106	25.3169
Fgf13	330.824	14.8726	3.89458	0.258966	3.24027e-52	3.97176e-49	42.1358	39.5282	586.205	655.427
Tm4sf20	250.912	0.0347231	-4.84796	0.328508	4.16298e-50	4.71025e-47	520.845	450.014	16.8501	15.9403
H2-K1	480.07	0.139041	-2.84642	0.198242	5.43465e-48	5.70988e-45	909.431	780.43	118.837	111.582
C1s1	3234.14	3.09279	1.62891	0.114167	1.87482e-47	1.83844e-44	1501.67	1630.79	4747.28	5056.82
2310057J18Rik	391.938	0.126136	-2.98695	0.211805	2.12338e-46	1.95205e-43	723.331	671.98	83.3635	89.078
Gpm6b	1546.42	0.278543	-1.84403	0.13363	1.56662e-44	1.3555e-41	2421.64	2429.47	617.245	717.313
Dram1	378.666	0.126551	-2.98221	0.216959	3.13951e-44	2.56551e-41	716.308	631.438	81.5898	85.3274
Rnase4	1622.85	3.37745	1.75593	0.12794	4.65995e-44	3.60754e-41	765.467	704.414	2547.02	2474.49
Pcdh10	259.744	13.9684	3.80409	0.285879	1.56816e-41	1.15331e-38	37.454	30.4063	512.597	458.517
Cxcl15	292.806	0.100753	-3.3111	0.254037	5.02249e-40	3.51789e-37	571.174	495.623	59.4187	45.0078
Ptgds	864.069	0.266245	-1.90917	0.14925	1.11994e-38	7.48782e-36	1351.86	1386.53	366.267	351.624
Tnip3	602.573	5.19894	2.37822	0.186137	1.24438e-38	7.95807e-36	214.19	169.262	1070.42	956.417
Enah	400.363	0.167023	-2.58188	0.203615	4.44869e-38	2.72649e-35	674.172	702.387	117.064	107.831
2610528A11Rik	399.121	0.14326	-2.80329	0.226155	1.57351e-36	9.2579e-34	795.898	605.086	106.421	89.078
Ly6c1	731.59	3.94719	1.98082	0.159905	1.96071e-36	1.10923e-33	284.416	298.996	1150.24	1192.71
Cpq	935.885	4.05931	2.02123	0.165692	1.82663e-35	9.95108e-33	415.506	315.212	1454.43	1558.4
Tmem132a	271.297	0.0941752	-3.40851	0.279342	1.98745e-35	1.04405e-32	532.549	462.176	57.645	32.8182
Ccn2	2144.34	0.344777	-1.53627	0.126692	5.23062e-35	2.653e-32	2967.06	3432.88	1109.44	1068
Wipf1	155.92	0.04468	-4.48423	0.382665	1.09646e-32	5.37594e-30	303.144	294.942	11.529	14.065
Xdh	988.104	3.30772	1.72584	0.149209	4.01777e-32	1.90637e-29	452.96	453.055	1621.15	1425.25
Smoc1	262.209	8.08088	3.01451	0.261361	5.29208e-32	2.43254e-29	63.2037	49.6637	487.765	448.203
C1ra	1041.26	3.2453	1.69835	0.14988	5.76352e-31	2.56896e-28	438.914	528.057	1592.77	1605.28
Tff2	468.933	0.199139	-2.32815	0.206562	1.08619e-30	4.69905e-28	731.524	839.215	175.595	129.398
Celsr1	815.026	3.44626	1.78503	0.160219	5.37791e-30	2.2601e-27	327.723	394.269	1278.83	1259.28
Smagp	223.402	126.282	6.9805	0.619907	4.3218e-29	1.76581e-26	2.34088	4.05418	454.952	432.263
Aldh1l2	322.982	0.147045	-2.76567	0.253017	4.74067e-29	1.88461e-26	457.641	672.994	81.5898	79.7014
Kalrn	358.694	0.204986	-2.2864	0.209438	5.53847e-29	2.14382e-26	619.162	576.707	117.95	120.959
Eno3	3765.33	0.449912	-1.15228	0.106047	1.39099e-28	5.24619e-26	5216.64	5209.62	2304.02	2331.03
Ly6a	8987.97	2.12287	1.08601	0.100827	3.58597e-28	1.31865e-25	5623.96	5792.41	11852.7	12682.8
Hkdc1	954.381	3.00036	1.58514	0.147467	4.15996e-28	1.49241e-25	452.96	488.529	1387.03	1489.01
Samd9l	3608.29	2.41756	1.27355	0.121181	6.23975e-27	2.13443e-24	2009.64	2171.01	4727.77	5524.71
Itln1	136.419	0.0310037	-5.01142	0.474132	6.16813e-27	2.13443e-24	319.53	210.817	10.6421	4.68832
Sort1	441.27	0.226331	-2.1435	0.20563	1.10689e-26	3.70027e-24	669.491	776.375	140.122	179.094
Ambp	176.752	10.5363	3.3973	0.327159	1.89639e-26	6.19866e-24	33.9427	25.3386	297.98	349.748
Slc18b1	196.095	0.127585	-2.97047	0.287081	2.50985e-26	8.02552e-24	364.006	334.47	39.0212	46.8832
Pkdcc	1415.8	0.365519	-1.45198	0.140564	3.55432e-26	1.11235e-23	2269.48	1897.36	755.592	740.754
Clca3a1	299.99	0.176946	-2.49862	0.243798	6.56354e-26	2.01131e-23	564.151	460.149	76.2687	99.3923
Slc20a1	891.656	0.350357	-1.5131	0.147725	8.68501e-26	2.6071e-23	1286.31	1367.27	446.083	466.956
Ebp	2092.06	2.38848	1.25609	0.122563	9.65332e-26	2.83981e-23	1171.61	1272	2855.64	3068.97
Psd4	472.826	4.19024	2.06703	0.202451	1.11383e-25	3.21243e-23	174.395	182.438	859.353	675.118
Mtap	12305.3	0.492856	-1.02076	0.10002	1.84985e-25	5.23258e-23	16244.5	16852.2	8370.94	7753.54
Timp1	564.365	3.74715	1.90579	0.188156	2.73769e-25	7.59787e-23	200.145	265.549	901.922	889.843
Pou6f1	270.162	5.4397	2.44353	0.24542	1.41802e-24	3.86253e-22	85.442	78.043	488.652	428.512
Dpysl3	443.69	0.255491	-1.96866	0.198498	2.12634e-24	5.6866e-22	682.365	738.874	195.993	157.527
Thbs1	753.999	0.290383	-1.78397	0.180815	3.56851e-24	9.37306e-22	1329.62	1020.64	360.059	305.678
Padi4	494.455	3.53623	1.82221	0.184852	3.89557e-24	1.00526e-21	210.679	216.899	813.237	737.004
Gyg	291.113	5.3356	2.41565	0.245683	5.38816e-24	1.3594e-21	73.7376	104.395	509.049	477.271
Porcn	863.123	2.75086	1.45988	0.148398	5.54519e-24	1.3594e-21	459.982	447.987	1281.49	1263.03
Nkain1	154.294	0.00818368	-6.93304	0.683402	5.48443e-24	1.3594e-21	305.484	307.104	1.77369	2.81299
Flna	30375.5	1.92001	0.941113	0.0973204	9.85234e-24	2.3757e-21	20655.9	20402.7	41850.2	38593.3
Cmtm8	146.018	0.0968888	-3.36753	0.345736	1.24696e-23	2.95832e-21	283.246	251.359	20.3974	29.0676
Cth	605.331	0.313592	-1.67304	0.172344	1.81768e-23	4.24385e-21	873.147	980.098	297.093	270.985
Cdkn2a	1026.72	2.57866	1.36662	0.141437	3.22333e-23	7.40811e-21	572.344	560.49	1525.37	1448.69
Mpdz	164.788	0.126693	-2.98059	0.31225	7.86096e-23	1.77888e-20	301.973	285.82	31.0396	40.3195
Nr2f1	127.303	0.0812226	-3.62197	0.38096	1.40203e-22	3.12463e-20	208.338	264.535	20.3974	15.9403
Plscr2	1145.71	0.378513	-1.40159	0.148117	2.09567e-22	4.60079e-20	1814.18	1528.43	594.187	646.05
Cpe	3096.02	0.484308	-1.046	0.109701	2.22134e-22	4.80496e-20	4254.54	4117.02	2024.67	1987.85
Acbd7	167.767	0.114422	-3.12756	0.333122	3.33117e-22	7.10119e-20	316.018	288.86	23.058	43.1325
Cxcl16	2536.96	2.34868	1.23185	0.131057	4.37837e-22	9.14727e-20	1640.95	1355.11	3743.38	3408.41
Mfsd1	118	0.0128778	-6.27897	0.651793	4.41537e-22	9.14727e-20	229.406	237.169	3.54738	1.87533
Ddit4	4475.47	0.480671	-1.05688	0.11295	7.37425e-22	1.5065e-19	6419.85	5727.54	2977.14	2777.36
G6pdx	2290.42	2.30205	1.20292	0.12974	1.49155e-21	3.00537e-19	1238.32	1502.07	3236.99	3184.31
Gjb1	328.09	4.40257	2.13835	0.233338	2.866e-21	5.63911e-19	135.771	101.354	577.336	497.899
Lamp2	6052.47	2.09811	1.06909	0.116197	2.87534e-21	5.63911e-19	4179.63	3552.47	7932.83	8544.93
Arhgap31	248.486	0.173774	-2.52472	0.276071	3.37095e-21	6.52411e-19	341.768	509.813	68.2871	74.0754
Foxp2	122.565	0.0103925	-6.58831	0.696864	3.64384e-21	6.96068e-19	251.644	234.129	3.54738	0.937664
Rnf130	1280.31	2.35914	1.23826	0.135432	4.84048e-21	9.12803e-19	776.001	729.752	1737.33	1878.14
Nr1i2	125.774	0.0981134	-3.34941	0.370596	1.0572e-20	1.9684e-18	205.997	254.4	23.9448	18.7533
Ndfip2	1416.53	0.431716	-1.21185	0.133907	1.12639e-20	2.07101e-18	2111.47	1867.96	837.182	849.523
Eif4e	3797.64	0.499446	-1.0016	0.110675	1.38075e-20	2.50734e-18	5317.3	4861.97	2545.25	2466.06
E2f6	885.206	0.40344	-1.30957	0.146266	2.55956e-20	4.53597e-18	1283.97	1253.75	510.823	492.273
Dbt	607.567	0.308034	-1.69884	0.190178	2.55163e-20	4.53597e-18	1068.61	801.714	291.772	268.172
Gm50397	278.906	0.241894	-2.04755	0.229482	2.69435e-20	4.718e-18	438.914	465.217	105.535	105.956
Gm49980	299.868	0.224223	-2.15699	0.241861	2.74606e-20	4.75198e-18	421.358	564.544	101.987	111.582
Kyat3	229.134	0.206665	-2.27463	0.256924	4.92185e-20	8.41807e-18	403.801	360.822	81.5898	70.3248
Galnt12	179.014	6.25	2.64386	0.29908	5.58899e-20	9.44924e-18	53.8402	41.5553	312.17	308.491
Rlim	3139.07	1.98046	0.985835	0.111409	9.04189e-20	1.51133e-17	2023.69	2148.72	4119.4	4264.49
Pmaip1	341.905	0.275234	-1.86127	0.212841	1.16299e-19	1.92207e-17	511.482	568.599	136.574	150.964
Atp6v0e2	349.398	3.78415	1.91997	0.221666	2.76992e-19	4.52698e-17	162.691	122.639	569.355	542.907
Pipox	268.536	0.235998	-2.08316	0.241296	3.54558e-19	5.73099e-17	427.21	447.987	111.743	87.2027
P2ry2	144.343	0.137685	-2.86056	0.332584	4.46564e-19	7.13968e-17	262.178	248.318	27.4922	39.3819
Med12	1330.83	2.20041	1.13777	0.131578	4.70058e-19	7.43449e-17	799.409	843.269	1810.94	1869.7
Zdhhc9	830.448	2.52712	1.3375	0.155169	5.13169e-19	8.03e-17	430.721	495.623	1215.87	1179.58
Dmbt1	295.94	3.89937	1.96324	0.228634	5.47625e-19	8.47896e-17	121.726	113.517	448.744	499.775
Jak3	575.089	2.76723	1.46845	0.170807	5.78952e-19	8.87063e-17	299.632	300.009	870.882	829.832
Hs2st1	3002.63	0.521396	-0.939549	0.109786	1.19747e-18	1.81584e-16	3922.14	4011.61	2032.65	2044.11
Cnp	393.344	3.32963	1.73536	0.204688	1.43571e-18	2.15489e-16	194.293	161.154	623.452	594.479
Rapgef3	720.738	0.389932	-1.3587	0.1621	3.70882e-18	5.51041e-16	1115.43	973.003	403.515	391.006
Klhl22	696.49	2.57731	1.36587	0.163103	4.10414e-18	6.03678e-16	407.313	358.795	1028.74	991.11
Rpl13a	4195.45	0.504833	-0.986123	0.117362	4.23956e-18	6.17423e-16	6050	5163	2748.33	2820.49
Zfp518a	91.0021	0.071783	-3.80021	0.455117	5.27066e-18	7.6006e-16	187.27	154.059	13.3027	9.37664
Cdkn1a	631.359	0.357401	-1.48439	0.178133	5.34651e-18	7.63513e-16	833.352	1039.9	318.378	333.808
Pde9a	470.222	0.338726	-1.56181	0.187756	5.87643e-18	8.31119e-16	657.786	757.118	229.693	236.291
Ndufb11	3852.07	1.89636	0.923234	0.110509	6.30809e-18	8.83673e-16	2754.04	2511.56	5138.38	5004.31
Pard3b	86.949	0.0207686	-5.58945	0.660546	7.33547e-18	1.0179e-15	127.578	213.858	3.54738	2.81299
Prdx4	1760.81	2.12805	1.08954	0.130961	7.82974e-18	1.07633e-15	1191.51	1032.8	2335.06	2483.87
Sardh	735.79	0.400062	-1.3217	0.159731	9.38066e-18	1.27759e-15	1122.45	994.287	419.478	406.946
Pros1	131.568	7.42664	2.89271	0.351282	1.21569e-17	1.64051e-15	25.7496	33.447	227.032	240.042
Anxa10	1125.41	2.69769	1.43172	0.174018	1.31511e-17	1.75854e-15	698.752	496.637	1520.94	1785.31
Cyp21a1	89.8936	20.5458	4.36077	0.528537	1.52974e-17	2.02711e-15	11.7044	4.05418	185.351	158.465
Il13ra1	147.418	6.88777	2.78404	0.340708	1.7219e-17	2.26137e-15	43.3062	28.3793	238.561	279.424
Pgrmc1	6439.45	1.84094	0.88044	0.106893	1.9996e-17	2.60285e-15	4576.41	4405.88	7956.78	8818.73
Tfpi	312.922	3.56797	1.8351	0.226935	3.75331e-17	4.84275e-15	146.305	120.612	519.692	465.081
Eif4g3	84.3247	0.0400803	-4.64096	0.569815	3.91391e-17	5.00606e-15	113.533	211.831	4.43423	7.50131
Maob	714.234	3.09479	1.62984	0.20145	4.02651e-17	5.10568e-15	272.712	407.445	973.756	1203.02
Slc4a3	88.9424	0.0799855	-3.64412	0.4503	4.22787e-17	5.31519e-15	180.247	151.018	14.1895	10.3143
Lcn2	3712.41	1.86588	0.89986	0.111276	6.54451e-17	8.1579e-15	2534	2594.67	5085.17	4635.81
Ptbp2	1518.79	0.432283	-1.20995	0.15186	1.25014e-16	1.54524e-14	2392.38	1879.11	841.616	962.043
Apbb1	72.218	0.0359266	-4.7988	0.596453	1.35198e-16	1.65719e-14	136.941	142.91	6.20792	2.81299
Twist2	91.6566	11.6156	3.53799	0.447853	2.22981e-16	2.7106e-14	12.8748	14.1896	161.406	178.156
Hmgcll1	74.6749	0.0492607	-4.34342	0.549442	2.5182e-16	3.03609e-14	135.771	150.005	3.54738	9.37664
Kdelr3	697.081	0.41537	-1.26753	0.161004	2.63434e-16	3.15029e-14	959.759	1024.69	420.365	383.504
Zfp182	282.818	3.64523	1.86601	0.238574	3.12353e-16	3.70516e-14	132.26	104.395	423.912	470.707
Gga2	746.534	0.429702	-1.21859	0.155435	3.53197e-16	4.15614e-14	1048.71	1055.1	458.499	423.824
Tead2	1899.53	2.10436	1.07338	0.137229	4.27598e-16	4.99169e-14	1251.2	1161.52	2845	2340.41
Fubp1	4473.83	0.524642	-0.930594	0.118965	5.36573e-16	6.21453e-14	6395.27	5412.33	2954.97	3132.73
Scrn1	2555.69	1.96458	0.974223	0.124699	5.69752e-16	6.54725e-14	1560.19	1845.67	3385.98	3430.91
Gm47223	1218.25	2.43037	1.28117	0.166333	9.78775e-16	1.11603e-13	815.795	579.748	1691.21	1786.25
Elovl6	3728.69	0.538659	-0.892555	0.115485	1.18757e-15	1.34369e-13	4575.24	5174.15	2507.11	2658.28
Rhob	1277.04	0.48989	-1.02947	0.133913	1.35723e-15	1.52393e-13	1790.77	1661.2	846.051	810.141
Smarca1	299.432	3.59429	1.84571	0.242328	1.5599e-15	1.73822e-13	140.453	112.503	415.931	528.842
Cbs	315.895	0.322416	-1.633	0.214223	1.58563e-15	1.75361e-13	475.198	488.529	150.764	149.088
Sparc	689.685	0.432328	-1.2098	0.158147	1.60838e-15	1.7655e-13	956.248	984.152	413.27	405.071
Zmym3	1715.09	1.93457	0.95201	0.124006	1.68703e-15	1.83811e-13	1165.76	1144.29	2343.05	2207.26
Cdk16	3115.65	2.03676	1.02628	0.134336	2.10986e-15	2.28191e-13	1795.45	2252.1	4443.1	3971.94
Irak1	2668.53	1.96377	0.973625	0.128036	2.6913e-15	2.88951e-13	1702.99	1850.73	3865.76	3254.63
Krt7	18831	1.70486	0.769654	0.10082	3.22177e-15	3.43398e-13	13973.9	13636.2	25066.7	22647.4
Lbp	4771.57	1.85249	0.889469	0.117348	3.85642e-15	4.08087e-13	3023.24	3592	6281.53	6189.52
Psrc1	457.116	0.365427	-1.45234	0.193648	4.364e-15	4.58501e-13	615.651	734.82	249.204	228.79
Selenof	18284.6	0.520417	-0.942259	0.126138	8.18176e-15	8.47794e-13	27256	21162.8	11847.4	12872.2
Morn4	74.4502	0.0825825	-3.59802	0.484704	8.18456e-15	8.47794e-13	145.134	131.761	11.529	9.37664
1700016C15Rik	875.401	2.42	1.27501	0.171782	8.78112e-15	8.99266e-13	491.584	511.84	1075.74	1422.44
Upk1b	80.8014	0.0928243	-3.42935	0.463026	8.80375e-15	8.99266e-13	142.793	155.072	15.9632	9.37664
Nos2	519.015	2.48199	1.3115	0.177324	1.05347e-14	1.06865e-12	297.291	286.833	767.121	724.814
Chac1	327.462	0.25173	-1.99005	0.270968	1.16772e-14	1.17644e-12	414.335	641.574	101.1	152.839
Sdsl	223.935	0.274095	-1.86725	0.254421	1.26539e-14	1.26616e-12	380.392	329.402	93.1188	92.8287
Il18rap	836.802	2.18592	1.12824	0.15283	1.31649e-14	1.30839e-12	543.083	490.556	1188.37	1125.2
Pax2	130.235	5.75063	2.52372	0.344594	1.3954e-14	1.37751e-12	42.1358	31.4199	227.032	220.351
Cd47	5608.59	1.75837	0.814237	0.109868	1.5071e-14	1.47786e-12	3905.75	4142.36	6796.78	7589.45
Hdac6	1113.63	2.02899	1.02076	0.138496	1.60719e-14	1.56557e-12	752.592	697.319	1515.62	1489.01
Mid2	435.006	2.60785	1.38286	0.189262	1.97534e-14	1.91153e-12	234.088	237.169	619.905	648.863
Cox7b	6005.61	1.78044	0.832234	0.112841	2.01287e-14	1.93512e-12	4512.04	4037.96	7329.78	8142.67
Cldn3	152.022	5.1479	2.36398	0.324821	2.04658e-14	1.95475e-12	44.4767	49.6637	292.659	221.289
Hbegf	978.594	0.46852	-1.09382	0.149598	2.27055e-14	2.15468e-12	1245.35	1440.25	597.734	631.048
Mical1	88.2028	0.121067	-3.04612	0.419692	2.35923e-14	2.22448e-12	150.987	166.221	16.8501	18.7533
Capg	14377.3	1.63296	0.707492	0.0968276	3.1451e-14	2.94658e-12	10975.2	10653.4	18329.3	17551.2
Bcl7a	64.5341	0.0207554	-5.59037	0.752914	3.6049e-14	3.35598e-12	136.941	116.558	0.886846	3.75065
Egln3	1863.53	0.545327	-0.874807	0.120382	4.12252e-14	3.81372e-12	2404.08	2450.75	1324.06	1275.22
Xiap	3230.66	1.94774	0.961799	0.13266	4.37746e-14	3.99007e-12	2428.66	1898.37	4302.97	4292.62
Erbb3	2864.67	1.8203	0.864174	0.118964	4.39452e-14	3.99007e-12	1896.11	2119.32	3581.97	3861.3
Htra3	181.335	0.241752	-2.0484	0.285734	4.38395e-14	3.99007e-12	296.121	293.928	77.1556	58.1351
F3	1346.31	0.522792	-0.935692	0.129206	4.54529e-14	4.10164e-12	1770.87	1789.92	904.582	919.848
Slc17a1	232.576	3.78222	1.91923	0.267994	5.00419e-14	4.48821e-12	77.2489	109.463	343.209	400.382
Kirrel3	822.255	0.469817	-1.08983	0.151821	5.99933e-14	5.34813e-12	1176.29	1079.43	507.276	526.029
Errfi1	2461.9	0.495855	-1.01201	0.14124	7.24821e-14	6.42252e-12	2899.18	3732.89	1533.36	1682.17
Sema3a	71.0291	0.0914136	-3.45145	0.486463	8.72919e-14	7.68848e-12	126.407	135.815	10.6421	11.252
Lamtor3	1887.1	0.548329	-0.866887	0.121289	9.99291e-14	8.74915e-12	2534	2373.72	1321.4	1319.29
S100a11	19742.6	1.68935	0.756468	0.105721	1.11503e-13	9.70468e-12	13613.4	15460.6	25764.6	24131.7
Gm50321	72.9842	0.0926582	-3.43194	0.48645	1.14625e-13	9.91775e-12	148.646	120.612	13.3027	9.37664
Mccc2	408.071	2.70262	1.43436	0.204413	1.54931e-13	1.33267e-11	236.429	193.587	634.981	567.286
Phka1	592.406	2.25811	1.17512	0.167479	1.81247e-13	1.54997e-11	358.154	354.741	820.332	836.396
Rpl10	31095.7	1.63832	0.712217	0.102012	1.95071e-13	1.65855e-11	21848.6	24657.5	39287.3	38589.5
Atrx	2466.73	1.87025	0.903233	0.128554	2.22583e-13	1.88159e-11	1692.45	1698.7	2940.78	3534.99
Lifr	128.665	6.68025	2.7399	0.395625	2.80775e-13	2.35996e-11	17.5566	44.596	203.088	249.418
Cxcl1	2725.79	0.493784	-1.01805	0.147037	3.9964e-13	3.33994e-11	4239.33	3119.69	1722.25	1821.88
Kcnab2	70.0946	0.0116866	-6.41901	0.885123	4.15976e-13	3.45683e-11	135.771	141.896	1.77369	0.937664
C4b	157.627	4.88299	2.28776	0.333621	4.35242e-13	3.59662e-11	36.2836	64.8669	285.564	243.793
Tmsb10	23379.1	1.73422	0.794285	0.114555	4.45577e-13	3.66145e-11	15531.7	18250.9	31683.4	28050.2
Nrp1	107.112	0.133253	-2.90775	0.425952	4.55061e-13	3.71861e-11	168.543	212.844	13.3027	33.7559
Ccnb2	840.394	2.13142	1.09181	0.159251	6.28522e-13	5.07963e-11	476.368	576.707	1178.62	1129.88
Otud5	2403.78	1.7436	0.802068	0.116084	6.2801e-13	5.07963e-11	1673.73	1790.93	3087.11	3063.35
Ly6d	58.0851	0.0651287	-3.94056	0.576041	6.51343e-13	5.2353e-11	118.214	101.354	6.20792	6.56364
C1rl	1004.37	2.14436	1.10055	0.161101	6.98132e-13	5.58089e-11	710.456	544.274	1400.33	1362.43
Slc39a10	1027.85	0.506902	-0.980221	0.14339	7.86962e-13	6.25698e-11	1327.28	1423.02	710.363	650.738
Phlda2	321.731	0.360558	-1.4717	0.217244	8.31596e-13	6.57631e-11	477.539	478.393	180.03	150.964
R3hdml	488.301	0.394119	-1.3433	0.19813	8.42606e-13	6.5925e-11	791.216	624.344	288.225	249.418
Fam107a	77.6613	0.101545	-3.29981	0.487776	8.39623e-13	6.5925e-11	126.407	158.113	18.6238	7.50131
Ugt2b34	4000.19	1.79963	0.847698	0.123588	8.59992e-13	6.6577e-11	2915.56	2731.5	4695.85	5657.86
Trpa1	124.816	0.000483671	-11.0137	3.04385	8.55645e-13	6.6577e-11	253.985	245.278	0	0
Lrp12	67.6053	0.0121447	-6.36353	0.890786	8.70618e-13	6.70467e-11	129.919	137.842	2.66054	0
Hmgcs2	54.2688	0.0395864	-4.65885	0.680914	1.07292e-12	8.21959e-11	91.2942	118.585	5.32107	1.87533
Rpf1	1232.29	0.532721	-0.908548	0.133582	1.08732e-12	8.28673e-11	1618.72	1621.67	817.672	871.089
Nsd1	1032.18	1.92663	0.946077	0.139297	1.1306e-12	8.57217e-11	694.07	695.292	1366.63	1372.74
Plec	6120.61	1.87486	0.906782	0.13353	1.22379e-12	9.23111e-11	3602.61	4792.04	8045.46	8042.34
Nckap5	59.5698	20.4307	4.35267	0.640566	1.23608e-12	9.2763e-11	7.02263	3.04063	108.195	120.021
Shtn1	274.441	2.96368	1.56739	0.234084	1.41702e-12	1.05802e-10	132.26	135.815	444.31	385.38
Ppa1	3146.79	0.591081	-0.758572	0.111673	1.49056e-12	1.10731e-10	4041.52	3920.39	2393.6	2231.64
Ckap4	52.8969	0.0407718	-4.61628	0.680422	1.54858e-12	1.14463e-10	87.7829	116.558	4.43423	2.81299
Sgpp2	1134.7	2.30427	1.20431	0.179913	1.73473e-12	1.27581e-10	543.083	798.673	1479.26	1717.8
Pglyrp1	457.326	2.62452	1.39205	0.208718	1.76728e-12	1.29328e-10	280.905	210.817	728.1	609.481
Rhox5	5913.36	1.63486	0.70917	0.104534	1.81452e-12	1.32127e-10	4626.74	4266.01	7413.14	7347.53
Lrrc40	1361.61	0.539263	-0.89094	0.132517	1.93117e-12	1.39929e-10	1705.33	1859.85	960.454	920.786
Acox2	188.283	0.283384	-1.81917	0.27439	1.9872e-12	1.43283e-10	276.223	317.24	77.1556	82.5144
Stxbp2	2548.63	1.69383	0.760287	0.112853	2.25465e-12	1.61774e-10	1887.92	1855.8	3229	3221.81
Rpl31-ps8	1001.32	0.49134	-1.02521	0.153986	2.31757e-12	1.65481e-10	1472.41	1238.55	681.097	613.232
Cachd1	227.211	0.323053	-1.63016	0.247438	2.76854e-12	1.96727e-10	344.109	350.687	109.969	104.081
Tmem223	151.275	4.21153	2.07435	0.315677	2.86253e-12	2.02428e-10	63.2037	47.6366	259.846	234.416
Dsp	6329.19	1.93481	0.952195	0.14331	2.93725e-12	2.06718e-10	3526.53	4956.23	8277.82	8556.18
Dock11	1501.62	1.91603	0.938118	0.140974	3.00624e-12	2.10565e-10	948.055	1079.43	1840.2	2138.81
Usp9x	3513.14	1.72806	0.789154	0.118602	3.16716e-12	2.20786e-10	2343.22	2739.61	4450.19	4519.54
Chst1	261.926	0.3099	-1.69013	0.257732	3.347e-12	2.32222e-10	381.563	427.716	142.782	95.6417
Nepn	51.4626	0.047296	-4.40214	0.662025	3.38664e-12	2.33869e-10	91.2942	106.422	5.32107	2.81299
Dusp6	4071.05	0.60972	-0.713781	0.106754	3.45124e-12	2.37217e-10	4994.26	5183.27	2984.24	3122.42
Pde5a	298.699	0.370938	-1.43075	0.218428	3.86012e-12	2.64086e-10	441.255	439.878	155.198	158.465
Ahrr	143.34	4.24759	2.08664	0.320478	4.29249e-12	2.92307e-10	58.5219	45.6095	238.561	230.665
Trib3	827.024	0.394636	-1.3414	0.205506	4.71463e-12	3.19574e-10	915.283	1481.8	448.744	462.268
Srgap1	83.7327	7.12839	2.83358	0.436158	4.96068e-12	3.34709e-10	21.0679	17.2303	157.859	138.774
Psma5	5221.08	0.624849	-0.678421	0.102196	5.19179e-12	3.48704e-10	6403.47	6524.19	3950.01	4006.64
Wls	5321.08	0.600692	-0.735303	0.111168	5.30666e-12	3.54799e-10	6561.48	6821.16	3698.15	4203.55
Firre	2005.08	1.7865	0.837139	0.127234	5.64897e-12	3.75976e-10	1520.4	1320.65	2526.62	2652.65
Naglu	1711.11	1.75235	0.809292	0.12294	5.85563e-12	3.87975e-10	1248.86	1207.13	2222.44	2166
Zfp810	53.9215	0.0203798	-5.61672	0.834002	5.97239e-12	3.93936e-10	122.896	89.1919	2.66054	0.937664
Snx12	1463.71	1.79929	0.847425	0.12903	6.12675e-12	4.02314e-10	1044.03	1019.63	1959.93	1831.26
Prkg2	2254.44	0.539334	-0.89075	0.136351	6.93293e-12	4.53228e-10	3073.57	2831.84	1387.03	1725.3
Raet1d	136.91	0.244221	-2.03374	0.316156	7.04893e-12	4.58773e-10	223.554	221.966	50.5502	51.5715
P3h3	55.315	33.8503	5.0811	0.765756	7.99381e-12	5.17978e-10	3.51131	2.02709	113.516	102.205
Lck	48.6805	0.0448396	-4.47908	0.686045	8.0303e-12	5.1806e-10	90.1237	97.3003	3.54738	3.75065
Slc41a2	275.882	2.86021	1.51612	0.23572	8.21714e-12	5.27799e-10	152.157	124.666	398.194	428.512
Fam102b	4528.03	0.587562	-0.767188	0.117303	8.41723e-12	5.383e-10	5273.99	6212.02	3361.14	3264.94
Zfp850	263.678	0.353613	-1.49976	0.233545	8.69118e-12	5.53414e-10	414.335	373.998	129.479	136.899
Odc1	8159.3	0.607468	-0.71912	0.109883	8.82828e-12	5.57318e-10	10295.2	10139.5	6549.35	5653.17
Gpc4	262.697	0.330347	-1.59795	0.248397	8.82646e-12	5.57318e-10	360.495	437.851	110.856	141.587
Adam28	65.7842	66.5723	6.05685	0.891496	9.02419e-12	5.67251e-10	1.17044	2.02709	143.669	116.27
Tfrc	7726.3	0.560844	-0.834329	0.12851	9.94903e-12	6.22725e-10	9550.78	10401	4800.5	6152.95
Tuba8	54.6152	0.0754676	-3.728	0.580887	1.00967e-11	6.29292e-10	113.533	91.219	6.20792	7.50131
Fxyd5	85.8244	0.140203	-2.83441	0.444357	1.01917e-11	6.32527e-10	154.498	150.005	26.6054	12.1896
Cox14	3224.17	1.6975	0.763413	0.117363	1.06589e-11	6.58745e-10	2470.8	2255.14	4287.9	3882.86
Ajuba	1669.71	1.7498	0.807193	0.124335	1.08109e-11	6.65345e-10	1184.48	1213.21	2196.72	2084.43
Atf5	2372.87	0.55184	-0.857677	0.132575	1.11916e-11	6.85908e-10	2798.52	3365.98	1747.97	1579.03
Clu	37582.8	1.56306	0.644371	0.101017	1.19737e-11	7.30792e-10	29005.8	28771.5	48976	43577.9
Odf2l	1004.27	0.472655	-1.08114	0.169227	1.42127e-11	8.63864e-10	1280.46	1473.69	541.863	721.063
Plaur	2573.88	0.602968	-0.729846	0.113007	1.53074e-11	9.26569e-10	3293.61	3172.4	1912.93	1916.58
Zfp422	862.792	2.07255	1.05141	0.165	1.63808e-11	9.8748e-10	620.332	481.434	1184.83	1164.58
Pla2g12a	526.683	0.460831	-1.11769	0.1757	1.65293e-11	9.92364e-10	697.581	759.145	323.699	326.307
Pigk	1746.63	0.577991	-0.790881	0.12327	1.78379e-11	1.06658e-09	2276.5	2184.19	1296.57	1229.28
Clmn	84.6443	0.000762377	-10.3572	2.97709	1.9344e-11	1.15195e-09	159.18	179.397	0	0
Nme4	227.867	0.0325014	-4.94335	0.793201	2.08327e-11	1.2356e-09	539.572	347.646	18.6238	5.62598
Sema3f	491.006	0.457652	-1.12768	0.178349	2.09298e-11	1.23637e-09	674.172	687.183	298.867	303.803
Galns	693.467	2.01089	1.00783	0.159053	2.21346e-11	1.30231e-09	451.789	452.041	959.567	910.471
Tha1	86.3426	6.64221	2.73166	0.43739	2.35076e-11	1.37758e-09	26.9201	15.2032	156.972	146.276
C2	118.241	4.71359	2.23683	0.359899	2.84575e-11	1.66103e-09	46.8175	31.4199	196.88	197.847
Gm20559	442.105	2.81493	1.4931	0.239658	2.9637e-11	1.72305e-09	285.587	163.181	648.284	671.367
Ly6g2	423.029	2.29975	1.20147	0.19194	3.0457e-11	1.76375e-09	242.281	257.44	578.223	614.17
Speg	50.7802	0.0649365	-3.94483	0.630334	3.18856e-11	1.83924e-09	111.192	81.0836	7.09476	3.75065
Elf4	1104.96	1.82617	0.868823	0.137867	3.34524e-11	1.92207e-09	792.387	747.996	1425.16	1454.32
D16Ertd472e	69.1604	0.00826064	-6.91953	1.03098	3.84497e-11	2.20061e-09	145.134	129.734	1.77369	0
Plp2	3214.99	1.8274	0.869793	0.139097	4.5765e-11	2.60914e-09	1947.61	2528.79	4420.04	3963.5
Dqx1	816.935	1.95357	0.966115	0.155109	4.65888e-11	2.64585e-09	505.629	579.748	1089.05	1093.32
Mab21l3	551.064	0.467955	-1.09556	0.176695	4.68798e-11	2.65213e-09	812.284	705.427	340.549	345.998
Itgb4	957.212	2.34177	1.2276	0.198733	5.03791e-11	2.83918e-09	423.699	690.224	1285.93	1429
Gpr137b	1559.96	1.784	0.835113	0.133829	5.21027e-11	2.92511e-09	1178.63	1030.78	2088.52	1941.9
Abca8b	61.4651	0.103949	-3.26605	0.532323	5.27366e-11	2.94944e-09	121.726	103.382	14.1895	6.56364
Ctsc	2201.84	1.70003	0.765559	0.12236	5.34402e-11	2.97747e-09	1622.23	1598.36	2631.27	2955.52
Araf	2007.81	1.67761	0.746406	0.119185	5.37794e-11	2.98506e-09	1511.04	1452.41	2492.04	2575.76
Lratd2	1267.89	0.561409	-0.832875	0.13398	5.81269e-11	3.21424e-09	1662.02	1613.56	861.127	934.851
Wdr81	917.51	1.91723	0.93902	0.151759	6.11607e-11	3.36934e-09	620.332	615.222	1303.66	1130.82
Rpl14	25510.6	0.64253	-0.638163	0.101593	6.14633e-11	3.37337e-09	29488	33005.1	20101.2	19448.1
Msn	7724.95	1.63103	0.705784	0.113471	6.92683e-11	3.78761e-09	5407.42	6195.8	10138.4	9158.16
Metap1	3551.12	0.626303	-0.675067	0.108429	7.68982e-11	4.18924e-09	4406.7	4385.61	2782.03	2630.15
Mlycd	861.663	2.0187	1.01343	0.165516	8.36349e-11	4.53943e-09	630.866	488.529	1178.62	1148.64
Lamb1	901.83	0.500768	-0.997786	0.162953	8.543e-11	4.61982e-09	1082.66	1344.97	619.905	559.785
Qrfp	93.9242	0.193329	-2.37087	0.393161	8.81208e-11	4.74787e-09	163.861	155.072	23.9448	32.8182
Mmp15	93.1176	0.198068	-2.33593	0.388249	9.81074e-11	5.26665e-09	149.816	165.208	28.3791	29.0676
Mb21d2	54.3766	14.7578	3.8834	0.640174	1.00159e-10	5.35721e-09	9.36351	3.04063	118.837	86.265
mt-Tn	575.51	0.402132	-1.31426	0.217308	1.00974e-10	5.38124e-09	1007.75	654.75	293.546	345.998
Irak4	720.035	1.95136	0.964481	0.158172	1.09489e-10	5.814e-09	499.777	458.122	964.888	957.354
Bcap31	2366.05	1.63906	0.712873	0.11611	1.26532e-10	6.6948e-09	1721.71	1822.35	2917.72	3002.4
Cgn	1394.48	1.77239	0.825693	0.135448	1.3156e-10	6.9359e-09	941.032	1039.9	1716.05	1880.95
Hmgn5	491.176	2.20026	1.13767	0.188969	1.42511e-10	7.45976e-09	298.462	300.009	620.792	745.442
Gm17552	51.9021	0.0811614	-3.62306	0.605705	1.42383e-10	7.45976e-09	99.4873	94.2597	3.54738	10.3143
Tnnt2	745.077	0.514767	-0.958009	0.158583	1.4701e-10	7.668e-09	998.384	989.22	528.56	464.143
Arhgef5	5729.42	1.57272	0.653263	0.106683	1.60843e-10	8.35987e-09	4207.73	4609.6	7203.85	6896.52
Flot2	3444.02	1.63335	0.707835	0.116126	1.67662e-10	8.6836e-09	2436.85	2732.52	4452.85	4153.85
Syt7	47.4893	0.0179683	-5.7984	0.924518	1.71519e-10	8.85216e-09	95.9759	91.219	0.886846	1.87533
AW112010	2582.45	1.69586	0.76202	0.125623	1.78644e-10	9.18765e-09	2017.84	1763.57	3096.86	3451.54
Taf1	1805.16	1.71692	0.779823	0.128688	1.79466e-10	9.19779e-09	1223.11	1396.66	2246.38	2354.47
Gprc5b	314.745	0.413789	-1.27303	0.213571	1.8037e-10	9.21204e-09	458.812	442.919	180.03	177.218
Tppp3	124.943	0.247992	-2.01163	0.340084	1.861e-10	9.47179e-09	210.679	195.614	54.0976	39.3819
Htatsf1	825.697	1.92869	0.947623	0.15767	1.87114e-10	9.49058e-09	511.482	593.937	1056.23	1141.14
Rabggtb	2773.37	0.605713	-0.723294	0.119287	1.94235e-10	9.76944e-09	3456.3	3503.82	1928.89	2204.45
Myzap	323.884	0.414289	-1.27129	0.213665	1.94605e-10	9.76944e-09	438.914	488.529	187.124	180.969
Gm11478	351.926	0.395569	-1.338	0.225218	1.94246e-10	9.76944e-09	578.196	443.933	209.296	176.281
Ddr2	116.114	0.246861	-2.01823	0.342354	2.09171e-10	1.0465e-08	187.27	190.546	42.5686	44.0702
Gls2	2138.81	0.557248	-0.843609	0.140507	2.13624e-10	1.06515e-08	3070.06	2475.08	1599.87	1410.25
Sgk1	379.585	0.395184	-1.3394	0.226548	2.32584e-10	1.15577e-08	456.471	645.628	197.767	218.476
Accs	332.187	2.37939	1.25059	0.211051	2.35287e-10	1.16527e-08	183.759	197.641	469.141	478.208
Atp6ap2	1892.54	1.74238	0.801057	0.133437	2.40531e-10	1.18724e-08	1406.87	1312.54	2221.55	2629.21
Slc6a8	1153.04	1.83646	0.876925	0.146676	2.51619e-10	1.23369e-08	724.501	872.662	1481.92	1533.08
Sod1	7386.62	1.54847	0.630846	0.104066	2.51001e-10	1.23369e-08	5565.43	5916.06	9360.66	8704.33
3830406C13Rik	99.214	0.199684	-2.32421	0.397307	2.57752e-10	1.25956e-08	188.441	146.964	23.9448	37.5065
Rps2-ps10	5695.33	1.76984	0.823615	0.137689	2.68856e-10	1.30947e-08	3442.26	4653.18	7524	7161.87
Vwa5a	1583.79	1.686	0.753604	0.125576	2.72041e-10	1.32061e-08	1130.64	1195.98	1996.29	2012.23
Gm38124	81.1276	5.83184	2.54395	0.435513	2.91496e-10	1.4104e-08	25.7496	18.2438	144.556	135.961
Podxl	1750.42	0.579096	-0.788126	0.131906	2.92844e-10	1.41228e-08	2068.16	2403.11	1299.23	1231.15
Ppp3ca	1568.61	0.593278	-0.753219	0.125989	3.04583e-10	1.46409e-08	2042.41	1927.76	1137.82	1166.45
Cacna2d1	445.784	0.444817	-1.16872	0.198712	3.1302e-10	1.49974e-08	694.07	555.423	259.846	273.798
Cavin3	762.358	1.94361	0.958739	0.161972	3.22786e-10	1.54151e-08	469.346	545.287	1062.44	972.357
Tbc1d9b	1968.56	1.7005	0.765961	0.128378	3.28197e-10	1.56228e-08	1445.49	1430.11	2684.48	2314.15
Lima1	5149.37	1.55622	0.63805	0.106346	3.5561e-10	1.68731e-08	3814.46	4160.6	6356.02	6266.41
Tep1	858.112	1.87623	0.90784	0.153691	3.62337e-10	1.7137e-08	628.525	543.26	1129.84	1130.82
Commd6	693.734	0.497429	-1.00744	0.171259	3.64616e-10	1.71895e-08	1034.67	839.215	442.536	458.517
Hist1h2bm	66.9929	783.499	9.61379	2.83141	3.80326e-10	1.78729e-08	0	0	150.764	117.208
Gm11884	58.3532	0.10741	-3.2188	0.555584	3.84193e-10	1.79971e-08	107.68	105.409	5.32107	15.0026
Spry2	511.729	0.446424	-1.16351	0.199278	4.09243e-10	1.91097e-08	620.332	811.849	284.677	330.058
Tubgcp6	766.296	1.89809	0.924545	0.157327	4.38319e-10	2.04027e-08	510.311	527.043	1069.54	958.292
Gm15398	151.434	3.6554	1.87003	0.324596	4.7226e-10	2.19131e-08	74.908	48.6502	225.259	256.92
Cc2d1a	1638.54	1.68943	0.756537	0.128207	4.97542e-10	2.30137e-08	1235.98	1167.6	2168.34	1982.22
Tspan17	532.064	2.03206	1.02294	0.175952	5.58467e-10	2.57508e-08	346.45	339.538	750.271	691.996
Macc1	211.347	0.357281	-1.48487	0.258627	5.94944e-10	2.7347e-08	335.916	295.955	102.874	110.644
Nap1l1	16633.9	0.661508	-0.59617	0.10073	6.32384e-10	2.89774e-08	19201	21095.9	12863.7	13374.8
Arsa	1963.05	1.63505	0.709335	0.120707	6.41129e-10	2.92336e-08	1418.57	1523.36	2443.26	2466.99
Wnt7a	42.2529	0.0665753	-3.90887	0.677151	6.4195e-10	2.92336e-08	73.7376	86.1513	4.43423	4.68832
Smim31	842.035	1.83328	0.874429	0.150248	6.53419e-10	2.9664e-08	579.367	587.856	1059.78	1141.14
Stat3	1897.62	1.76285	0.817906	0.140369	6.93167e-10	3.13717e-08	1191.51	1510.18	2490.26	2398.54
Mmp13	355.4	2.3656	1.24221	0.216228	6.97367e-10	3.14649e-08	183.759	225.007	471.802	541.032
Ints12	1796.25	0.612661	-0.70684	0.120734	7.1612e-10	3.22123e-08	2225	2265.27	1360.42	1334.3
Hspe1	6470.45	0.66442	-0.589833	0.100102	7.63705e-10	3.4248e-08	7803.31	7842.81	5054.13	5181.53
Arhgap29	117.822	0.0026317	-8.56979	1.31451	7.7641e-10	3.47119e-08	235.258	235.142	0.886846	0
Igbp1	1940.84	1.62621	0.701518	0.120216	8.28124e-10	3.69118e-08	1475.92	1443.29	2484.05	2360.1
Ap1g2	481.615	2.20439	1.14038	0.199131	8.41875e-10	3.74113e-08	249.303	334.47	655.379	687.307
Hccs	840.782	0.538301	-0.893514	0.15495	8.49957e-10	3.76567e-08	1184.48	1024.69	578.223	575.725
Rida	1726.66	1.73734	0.796878	0.137649	8.8273e-10	3.89912e-08	1197.36	1285.17	2008.71	2415.42
Zranb2	4452.64	0.543489	-0.879677	0.153124	9.46989e-10	4.17044e-08	6906.76	4753.53	3008.18	3142.11
Ssbp4	2160.18	1.62025	0.696214	0.119755	9.63453e-10	4.23028e-08	1644.47	1612.55	2804.21	2579.51
Cpeb4	427.366	2.17008	1.11775	0.196028	9.73644e-10	4.2623e-08	270.371	254.4	548.957	635.736
Gm11613	208.885	2.75071	1.4598	0.258517	1.09176e-09	4.76518e-08	105.339	108.449	309.509	312.242
Enox2	606.437	1.97238	0.979939	0.171713	1.09539e-09	4.76687e-08	403.801	394.269	869.109	758.57
Lmbr1	54.9765	9.42966	3.23721	0.575768	1.15698e-09	5.02008e-08	12.8748	6.08127	93.1188	107.831
Usp18	82.938	0.204026	-2.29318	0.409797	1.1866e-09	5.13343e-08	143.964	135.815	25.7185	26.2546
Sult1d1	618.535	2.07748	1.05483	0.185956	1.21384e-09	5.22896e-08	447.107	337.51	804.369	885.154
Tfe3	1280.56	1.76125	0.816599	0.142468	1.21934e-09	5.22896e-08	831.011	992.26	1680.57	1618.41
Slfn2	1165.57	1.73886	0.798141	0.139147	1.21674e-09	5.22896e-08	886.022	789.551	1501.43	1485.26
Cd44	8979.52	0.659344	-0.600897	0.103712	1.23007e-09	5.25961e-08	10679.1	11116.6	6720.52	7401.92
Smtnl2	361.536	2.30905	1.2073	0.213812	1.26189e-09	5.38004e-08	202.486	220.953	561.373	461.33
Sh2d4a	1501.02	1.67294	0.742386	0.129609	1.42874e-09	6.07379e-08	1108.41	1105.78	1982.1	1807.82
Myo7b	819.792	0.544094	-0.878072	0.154552	1.43735e-09	6.09277e-08	1005.41	1140.24	574.676	558.847
Vat1	3212.77	1.66988	0.739745	0.129654	1.47919e-09	6.25212e-08	2131.37	2607.85	4252.42	3859.42
Med14	1405.86	1.75275	0.809624	0.142346	1.58269e-09	6.67041e-08	912.942	1094.63	1730.24	1885.64
Ahnak2	770.229	1.95759	0.969082	0.171757	1.63636e-09	6.87691e-08	444.767	572.653	987.059	1076.44
Kitl	3144.47	0.616108	-0.698744	0.122251	1.65483e-09	6.93473e-08	4076.64	3769.37	2185.19	2546.69
4632404H12Rik	177.466	3.04002	1.60408	0.288931	1.73047e-09	7.21061e-08	94.8055	72.9752	259.846	282.237
Dcp1b	48.3732	0.0014971	-9.38361	2.88895	1.72907e-09	7.21061e-08	74.908	118.585	0	0
Rbm26	835.54	0.55815	-0.841275	0.148659	1.73697e-09	7.21728e-08	1102.55	1064.22	596.847	578.538
Mroh1	1996.59	1.62143	0.697263	0.122186	1.81243e-09	7.50958e-08	1432.62	1574.04	2523.96	2455.74
Ace	56.5387	7.87509	2.9773	0.5371	1.8212e-09	7.52473e-08	10.5339	12.1625	98.4399	105.018
Dnm1	134.46	0.260365	-1.94139	0.351369	1.83747e-09	7.57067e-08	188.441	245.278	64.7397	39.3819
Gripap1	792.279	1.87804	0.909224	0.161496	1.90507e-09	7.82728e-08	488.073	589.883	1060.67	1030.49
C1s2	79.7174	5.35379	2.42056	0.439215	1.94322e-09	7.9618e-08	28.0905	18.2438	136.574	135.961
Lrp10	2062.65	1.60715	0.684506	0.120227	2.01106e-09	8.21684e-08	1500.5	1623.7	2532.83	2593.58
Plxnb2	12493.8	1.56466	0.645847	0.113237	2.04843e-09	8.34636e-08	8750.2	10510.5	15213.8	15500.5
Zdhhc15	60.9528	7.04915	2.81745	0.512019	2.20499e-09	8.93898e-08	15.2157	12.1625	101.1	115.333
Muc1	3099.55	1.55718	0.638937	0.112287	2.20603e-09	8.93898e-08	2489.52	2303.79	3755.79	3849.11
Tradd	1093.73	1.71269	0.776266	0.137855	2.28679e-09	9.24078e-08	807.602	779.416	1419.84	1368.05
Nnt	2333.54	1.7176	0.780391	0.138591	2.33313e-09	9.4022e-08	1481.77	1896.34	2896.44	3059.6
Zzef1	1464.62	1.67121	0.740895	0.131284	2.35432e-09	9.44691e-08	1024.13	1136.18	1816.26	1881.89
Ptprg	100.646	0.00314151	-8.31433	1.31381	2.35707e-09	9.44691e-08	214.19	187.506	0.886846	0
Atp6v0d1	1676.68	1.62732	0.702501	0.124338	2.4011e-09	9.5972e-08	1240.66	1277.07	2152.37	2036.61
Atf4	6252.64	0.631971	-0.66207	0.116816	2.41325e-09	9.61964e-08	7049.55	8393.16	4910.46	4657.37
Plaat3	40.5048	0.0215068	-5.53907	0.958184	2.62385e-09	1.04309e-07	92.4646	66.894	2.66054	0
Zzz3	2959.19	0.641604	-0.640244	0.113124	2.6389e-09	1.04624e-07	3544.09	3719.71	2209.13	2363.85
Sars	11035.1	0.663492	-0.591849	0.104151	2.78527e-09	1.10131e-07	13111.2	13593.7	9203.68	8231.75
Rp2	1057.5	1.87316	0.905474	0.162362	2.87097e-09	1.13195e-07	820.477	624.344	1336.48	1448.69
Ank	1372.22	0.571452	-0.807295	0.144669	2.87815e-09	1.13195e-07	1581.26	1946.01	981.738	979.858
Pgf	115.253	0.217638	-2.2	0.404931	2.94374e-09	1.15465e-07	133.43	251.359	44.3423	31.8806
Ermp1	756.752	0.535138	-0.902018	0.162482	2.95587e-09	1.15633e-07	935.18	1058.14	484.218	549.471
Plekhh2	626.265	0.533156	-0.90737	0.163655	3.02625e-09	1.18072e-07	841.545	810.836	419.478	433.201
Nfatc2	105.523	3.98722	1.99538	0.367107	3.18624e-09	1.23985e-07	37.454	41.5553	181.803	161.278
Etv1	145.941	3.19934	1.67778	0.308639	3.3051e-09	1.28271e-07	69.0559	62.8398	230.58	221.289
Prxl2a	3965.53	1.59693	0.675303	0.120431	3.36729e-09	1.30341e-07	3243.28	2788.26	4678.11	5152.46
Abhd6	512.838	0.501489	-0.995711	0.180926	3.38883e-09	1.3083e-07	668.32	714.549	312.17	356.312
Slc35g2	43.1635	0.0669729	-3.90028	0.715986	3.43017e-09	1.3208e-07	84.2716	79.0565	0.886846	8.43897
Psme2	3995.92	1.59903	0.677199	0.120914	3.48524e-09	1.33757e-07	3315.85	2756.84	4944.16	4966.8
Lmo7	1670.18	0.532831	-0.90825	0.164587	3.49192e-09	1.33757e-07	1855.14	2552.11	1037.61	1235.84
Haus7	842.751	1.7669	0.821224	0.149011	3.78141e-09	1.4447e-07	612.139	582.788	1100.58	1075.5
Cask	1491.81	1.64874	0.721363	0.129738	3.94891e-09	1.50478e-07	1090.85	1129.09	1793.2	1954.09
Flrt2	41.1397	19.7685	4.30513	0.783177	4.11187e-09	1.56283e-07	5.85219	1.01354	78.9293	78.7637
Cln3	263.26	2.45294	1.29451	0.238509	4.1463e-09	1.57185e-07	132.26	161.154	374.249	385.38
Zfp275	1278.62	1.67711	0.745981	0.134587	4.16452e-09	1.5747e-07	912.942	967.935	1676.14	1557.46
Psme1	1935.51	1.62851	0.703553	0.126691	4.30554e-09	1.62385e-07	1351.86	1551.74	2436.16	2402.29
Cnn3	4051.14	0.652046	-0.616955	0.110468	4.35554e-09	1.63851e-07	4746.13	5133.6	3268.03	3056.78
Mpp1	5549.68	1.53257	0.615953	0.110382	4.61205e-09	1.73058e-07	4066.1	4602.51	6617.64	6912.46
Pja1	2168.32	1.63408	0.708477	0.128236	4.95689e-09	1.85524e-07	1727.57	1519.3	2860.96	2565.45
Ranbp3l	375.671	2.58644	1.37097	0.254624	4.99734e-09	1.86563e-07	167.373	234.129	435.441	665.741
Fam3c	2524.78	1.65905	0.730359	0.132463	5.05199e-09	1.88126e-07	1677.24	2062.56	3058.73	3300.58
Usp25	1033.58	1.72792	0.789035	0.143736	5.08139e-09	1.88743e-07	702.263	786.511	1301.89	1343.67
Mfsd6	665.943	1.92359	0.9438	0.173312	5.15847e-09	1.90745e-07	396.779	492.583	861.127	913.284
Dop1b	1230.9	1.70624	0.77082	0.140275	5.16122e-09	1.90745e-07	828.67	959.827	1545.77	1589.34
Fam149a	5700.63	1.51837	0.602528	0.108375	5.365e-09	1.97779e-07	4304.87	4653.18	7218.92	6625.53
Mecp2	1438.63	1.69866	0.764395	0.139244	5.4197e-09	1.99296e-07	958.589	1138.21	1883.66	1774.06
Maged1	9411.98	1.46804	0.553893	0.0992552	5.50489e-09	2.01924e-07	7412.39	7703.95	11528.1	11003.5
Nav2	544.956	2.09191	1.06482	0.197075	5.68194e-09	2.07899e-07	289.098	395.282	705.929	789.513
Ccl2	2860.61	1.68218	0.750333	0.136903	5.79318e-09	2.11444e-07	2372.48	1827.42	3632.52	3610
Oard1	1680.7	0.606169	-0.722208	0.131686	5.92699e-09	2.15792e-07	2267.14	1957.16	1233.6	1264.91
Sprr2h	159.683	3.12736	1.64495	0.308966	6.07701e-09	2.20708e-07	83.1011	63.8533	270.488	221.289
Hook2	1038.45	1.71028	0.77423	0.14168	6.10735e-09	2.21264e-07	737.376	769.281	1274.4	1372.74
Akr1b3	5080.64	0.638649	-0.646905	0.117372	6.14534e-09	2.22093e-07	5818.25	6681.29	4122.06	3700.96
F8a	227.453	2.55853	1.35531	0.253522	6.27484e-09	2.26217e-07	112.362	132.774	345.87	318.806
Rilpl1	271.384	0.374719	-1.41612	0.265668	6.35805e-09	2.28657e-07	313.677	488.529	144.556	138.774
Ncald	113.76	3.67228	1.87667	0.353621	6.49056e-09	2.32853e-07	45.6471	45.6095	196.88	166.904
Fzd1	39.9511	0.00189386	-9.04445	2.85827	6.86708e-09	2.45761e-07	65.5445	94.2597	0	0
Scml4	81.6329	0.214589	-2.22035	0.421006	6.99979e-09	2.49903e-07	149.816	123.652	23.058	30.0052
Sgms2	1138.25	0.545954	-0.873149	0.162051	7.66251e-09	2.729e-07	1281.63	1696.67	762.687	812.017
Adgrg6	970.08	0.582844	-0.778819	0.143793	7.69552e-09	2.73414e-07	1187.99	1288.22	696.174	707.936
Mtmr9	984.02	1.7079	0.772226	0.142412	7.73935e-09	2.74309e-07	691.729	736.847	1256.66	1250.84
Gja1	610.349	0.525229	-0.928981	0.173013	7.78799e-09	2.75369e-07	788.875	831.107	376.023	445.39
Ids	1148.83	1.8039	0.851116	0.157946	8.00041e-09	2.82201e-07	897.726	709.481	1591	1397.12
Cltb	1922.23	1.6129	0.689657	0.126434	8.19571e-09	2.88076e-07	1390.48	1512.21	2513.32	2272.9
Trmt10a	405.963	0.490123	-1.02879	0.192766	8.22365e-09	2.88076e-07	565.322	539.206	264.28	255.044
Cbr1	77.2504	0.202294	-2.30548	0.439776	8.22571e-09	2.88076e-07	150.987	110.476	21.2843	26.2546
Tmem185a	738.575	1.78464	0.835631	0.155019	8.40432e-09	2.93632e-07	510.311	530.084	963.114	950.791
Cryz	4286.02	0.661997	-0.595104	0.108807	8.59246e-09	2.99494e-07	5437.86	4954.21	3372.67	3379.34
Myo9b	2610.25	1.56516	0.64631	0.118566	8.74421e-09	3.04063e-07	2042.41	1977.43	3386.86	3034.28
Rcbtb1	1787.68	1.58864	0.667797	0.12306	9.19895e-09	3.19121e-07	1412.72	1312.54	2214.45	2211.01
Dppa2	78.0806	4.89978	2.29272	0.437608	9.31049e-09	3.22231e-07	19.8975	28.3793	137.461	126.585
Fn1	10213.3	0.650083	-0.621303	0.114346	9.85131e-09	3.40148e-07	12441.8	12512.2	8686.65	7212.51
Hspd1	16906	0.674753	-0.567569	0.103824	9.99358e-09	3.44252e-07	19062.9	21584.5	13676	13300.8
Uba1	9568.24	1.543	0.625741	0.11667	1.00569e-08	3.45625e-07	6803.76	8014.1	12380.4	11074.7
Ostc	2748.87	0.656641	-0.606824	0.111723	1.05676e-08	3.62329e-07	3317.02	3370.04	2113.35	2195.07
Fam171b	36.0075	0.024602	-5.34508	0.972944	1.1295e-08	3.86369e-07	56.181	85.1378	1.77369	0.937664
Xylt1	37.526	21.6023	4.43311	0.827156	1.1477e-08	3.91683e-07	3.51131	2.02709	78.9293	65.6364
Fundc2	3339.02	1.57901	0.659023	0.122767	1.17891e-08	4.01404e-07	2750.53	2354.46	3933.16	4317.94
Ulk2	1068.81	1.67644	0.745403	0.139279	1.19893e-08	4.07275e-07	812.284	759.145	1348.89	1354.92
Flii	2970.04	1.55643	0.63824	0.118255	1.20968e-08	4.09983e-07	2139.56	2448.72	3671.54	3620.32
Synrg	1362.81	1.61763	0.693884	0.129159	1.21462e-08	4.1071e-07	1020.62	1031.79	1721.37	1677.48
Dctn1	3018.82	1.61394	0.69059	0.128728	1.26946e-08	4.28268e-07	2104.45	2447.71	4037.81	3485.3
Flcn	1580.29	1.59057	0.669546	0.124721	1.30966e-08	4.4082e-07	1182.14	1224.36	1965.25	1949.4
Psph	1528.63	0.617834	-0.694709	0.130039	1.39219e-08	4.67529e-07	1978.04	1836.54	1197.24	1102.69
Atp6ap1	3043.39	1.50468	0.589457	0.10934	1.45296e-08	4.86823e-07	2395.89	2412.24	3713.22	3652.2
Sema4a	1734.27	1.58505	0.664533	0.124494	1.48535e-08	4.96545e-07	1309.72	1335.85	2228.64	2062.86
Anxa7	2722.47	1.53131	0.614765	0.114552	1.53109e-08	5.0952e-07	2042.41	2208.51	3365.58	3273.38
Cmtm7	720.415	0.564951	-0.823803	0.156117	1.52831e-08	5.0952e-07	941.032	921.312	522.352	496.962
Mycbp2	1228.87	0.612394	-0.707468	0.133012	1.53997e-08	5.11318e-07	1505.18	1572.01	908.13	930.162
Mink1	3682.27	1.53936	0.622333	0.116235	1.59438e-08	5.28192e-07	2806.71	2923.06	4801.38	4197.92
Cast	3137.87	1.50136	0.586269	0.109144	1.62562e-08	5.37331e-07	2445.05	2518.66	3776.19	3811.6
Fmc1	760.641	1.75694	0.813069	0.154183	1.64674e-08	5.43093e-07	534.89	547.314	954.246	1006.11
Cdc45	1168.69	0.603975	-0.72744	0.137481	1.70857e-08	5.62223e-07	1521.57	1422	895.714	835.458
Insr	1017.68	1.7718	0.825219	0.156829	1.71341e-08	5.62558e-07	661.298	777.389	1210.54	1421.5
Ppp1r9b	2740.14	1.56302	0.644337	0.12088	1.7198e-08	5.63398e-07	1971.02	2249.06	3475.55	3264.94
Spry3	34.95	0.0582211	-4.10231	0.78883	1.77435e-08	5.79977e-07	50.3288	83.1107	3.54738	2.81299
Slc25a17	2163.71	0.633269	-0.65911	0.124327	1.84287e-08	6.01036e-07	2853.53	2493.32	1638	1669.98
Gm11960	40.7605	11.6982	3.54822	0.688621	1.8817e-08	6.12345e-07	7.02263	4.05418	80.7029	71.2624
1700025G04Rik	643.551	0.550629	-0.860848	0.164737	1.89342e-08	6.14796e-07	797.068	882.798	445.196	449.141
Mtmr1	604.452	1.87914	0.910071	0.174834	1.93475e-08	6.26835e-07	448.278	371.971	789.293	808.266
Itm2b	10316.5	1.43525	0.521305	0.0970516	1.97199e-08	6.37496e-07	8301.92	8495.53	12085.9	12382.8
Cacnb3	2280.71	1.56591	0.647005	0.122006	1.98369e-08	6.39872e-07	1663.19	1844.65	2907.97	2707.03
Pctp	344.102	2.11842	1.08299	0.209637	1.99907e-08	6.43422e-07	220.042	207.777	496.634	451.954
Syngr2	2455.46	1.53782	0.620882	0.116894	2.04095e-08	6.54039e-07	1831.74	1990.6	2955.86	3043.66
Fyn	34.7445	0.00225975	-8.78962	2.83947	2.04009e-08	6.54039e-07	53.8402	85.1378	0	0
Kdm5d	704.286	1.7922	0.841734	0.161149	2.10333e-08	6.71418e-07	517.334	471.298	882.411	946.102
Sh3glb1	4877	0.656169	-0.60786	0.114518	2.10431e-08	6.71418e-07	5483.5	6387.36	3831.17	3805.98
Bche	318.733	2.16557	1.11475	0.2166	2.15456e-08	6.85961e-07	190.781	198.655	419.478	466.019
Anxa8	3589.88	1.48755	0.572938	0.10763	2.18108e-08	6.92906e-07	2852.36	2859.21	4420.04	4227.92
Misp	2268.25	1.55605	0.637888	0.121044	2.4351e-08	7.71937e-07	1832.91	1671.34	2880.47	2688.28
2310039H08Rik	923.309	1.71878	0.781386	0.150185	2.47492e-08	7.82873e-07	708.115	625.357	1216.75	1143.01
Plpp3	544.874	1.87342	0.905676	0.175399	2.51339e-08	7.93337e-07	366.347	373.998	755.592	683.557
Arhgdig	84.0438	0.236398	-2.08071	0.414159	2.70085e-08	8.5068e-07	147.475	129.734	34.587	24.3793
Arhgef18	1275	1.66351	0.734234	0.141244	2.83464e-08	8.90913e-07	863.783	1017.6	1643.32	1575.27
Ube2a	1033.72	1.68518	0.752905	0.145092	2.89518e-08	9.08001e-07	743.228	769.281	1231.83	1390.56
Cdh16	98.3856	3.85595	1.94709	0.387923	2.90938e-08	9.10511e-07	38.6245	36.4876	137.461	180.969
Vcl	2115.13	1.61835	0.694527	0.133334	2.93501e-08	9.16583e-07	1426.76	1753.43	2628.61	2651.71
Ipo5	4456.42	0.637373	-0.64979	0.124364	2.95368e-08	9.20459e-07	4917.01	6065.05	3475.55	3368.09
Cln6	674.452	1.79501	0.84399	0.16393	3.00123e-08	9.333e-07	449.448	494.61	910.79	842.96
Palmd	458.351	0.479567	-1.0602	0.20844	3.03721e-08	9.42496e-07	533.72	723.671	273.148	302.865
H2afz	20401.7	0.705156	-0.503986	0.0951707	3.04931e-08	9.4426e-07	24681	23470.7	16669.1	16786.1
Gng5	4921.18	0.682829	-0.550405	0.104434	3.0862e-08	9.53673e-07	6064.04	5714.37	3928.73	3977.57
Slc39a8	262.774	0.431684	-1.21195	0.239731	3.13054e-08	9.6535e-07	342.938	403.391	163.18	141.587
Cxcl3	2290.64	0.597032	-0.744121	0.144325	3.27322e-08	1.00723e-06	3254.99	2545.01	1568.83	1793.75
Cndp2	1425.54	1.59282	0.671581	0.129514	3.41337e-08	1.04817e-06	1042.86	1123.01	1777.24	1759.06
Bcl10	1418.35	0.616351	-0.698176	0.134938	3.44004e-08	1.05416e-06	1653.83	1890.26	1081.95	1047.37
C330007P06Rik	1712.8	1.63442	0.708776	0.13714	3.56008e-08	1.08867e-06	1405.7	1154.43	2186.96	2104.12
Hip1r	1748.21	1.55363	0.635646	0.122329	3.62771e-08	1.10705e-06	1384.63	1317.61	2146.17	2144.44
Zbtb33	1022.57	1.72505	0.786635	0.153369	3.65979e-08	1.11453e-06	808.773	663.872	1265.53	1352.11
Parp4	471.5	1.94745	0.961586	0.189418	3.68534e-08	1.11999e-06	293.78	328.389	591.526	672.305
Fam3a	428.53	2.00544	1.00392	0.198298	3.71137e-08	1.12167e-06	301.973	252.373	607.489	552.284
Atp5j	3009.6	1.53244	0.615829	0.118374	3.70331e-08	1.12167e-06	2311.62	2381.83	3432.09	3912.87
Kcnh2	31.5145	0.037654	-4.73105	0.915088	3.71374e-08	1.12167e-06	66.715	55.745	2.66054	0.937664
Amotl1	368.214	2.03068	1.02196	0.202003	3.75928e-08	1.1331e-06	227.065	244.264	505.502	496.024
Tspan5	1220.14	0.60184	-0.732547	0.14267	3.8795e-08	1.16694e-06	1439.64	1638.9	854.032	947.978
Rbl2	1018.75	1.73688	0.796502	0.156013	4.124e-08	1.23796e-06	648.423	809.822	1346.23	1270.53
Rpl39	26796.3	1.5311	0.614569	0.11954	4.27208e-08	1.27858e-06	21409.7	20338.8	29030.9	36405.7
Gstm5	1505.85	0.629396	-0.667961	0.129814	4.28539e-08	1.27858e-06	1958.14	1773.7	1130.73	1160.83
Plcb1	94.8913	0.267209	-1.90396	0.385748	4.27846e-08	1.27858e-06	161.52	143.923	31.9264	42.1949
Kif13b	530.298	1.93707	0.953878	0.188906	4.29418e-08	1.27861e-06	314.848	387.174	662.474	756.694
Golph3l	2469.21	1.50521	0.589966	0.113724	4.31162e-08	1.2812e-06	1935.9	1960.2	2939.89	3040.84
Pdk3	360.485	2.16494	1.11433	0.222591	4.52814e-08	1.34283e-06	183.759	255.413	500.181	502.588
Utp14a	1392.97	1.63459	0.708926	0.138646	4.71291e-08	1.39481e-06	971.464	1107.8	1835.77	1656.85
Mrgprb2	115.226	3.52672	1.81833	0.369889	4.85743e-08	1.4347e-06	59.6924	35.4741	179.143	186.595
Dgkd	2127.22	0.65736	-0.605244	0.117449	4.94506e-08	1.45765e-06	2632.32	2544	1700.08	1632.47
Dnase1l1	543.023	1.82998	0.87183	0.173099	5.15022e-08	1.51509e-06	364.006	385.147	711.25	711.687
Las1l	2370.6	1.61028	0.687308	0.134937	5.17381e-08	1.51899e-06	1968.68	1605.45	3108.39	2799.86
Fam50a	817.809	1.85392	0.890582	0.177078	5.2186e-08	1.52909e-06	469.346	647.655	1056.23	1098
Echdc2	102.761	0.277858	-1.84758	0.377848	5.47731e-08	1.60171e-06	188.441	139.869	45.2291	37.5065
Tgds	354.267	0.494125	-1.01705	0.204464	5.67805e-08	1.65428e-06	499.777	463.19	224.372	229.728
Tdrkh	29.8548	0.00274158	-8.51078	2.81502	5.6796e-08	1.65428e-06	66.715	52.7043	0	0
P4ha1	851.771	0.527636	-0.922385	0.184678	5.80859e-08	1.68851e-06	926.987	1333.82	564.921	581.351
Aim2	1661.5	0.644625	-0.633467	0.124048	5.82287e-08	1.68932e-06	2029.54	2047.36	1245.13	1323.98
Pklr	1622.75	1.61194	0.688796	0.135733	6.01145e-08	1.73718e-06	1272.27	1173.68	2177.21	1867.83
Ssx2ip	779.136	0.573824	-0.801319	0.159257	6.00882e-08	1.73718e-06	951.566	1052.06	590.639	522.279
Plxna3	468.546	1.91135	0.934592	0.187401	6.07e-08	1.75066e-06	292.61	333.456	603.942	644.175
Btc	454.102	0.50617	-0.982308	0.197799	6.14638e-08	1.76922e-06	607.457	616.235	259.846	332.871
Gpkow	1483.9	1.61642	0.692798	0.136774	6.29107e-08	1.80733e-06	1210.23	1022.67	1867.7	1835.01
Tnxb	2068	1.51373	0.598108	0.117253	6.67037e-08	1.91256e-06	1604.67	1644.98	2500.02	2522.31
Vegfc	168.92	2.79583	1.48328	0.304557	6.96469e-08	1.99307e-06	84.2716	84.1242	294.433	212.85
App	6666.9	1.473	0.558755	0.109354	7.21516e-08	2.05889e-06	4986.07	5678.89	8157.21	7845.43
Ccdc88b	70.3973	0.211365	-2.24219	0.464483	7.22271e-08	2.05889e-06	121.726	115.544	28.3791	15.9403
Ctsa	2332.36	1.54293	0.625674	0.123421	7.29679e-08	2.07599e-06	1683.09	1934.86	2909.74	2801.74
Cd24a	13323.4	0.712331	-0.489381	0.0951275	7.34127e-08	2.08461e-06	15792.7	15520.4	10998.7	10981.9
Clrn3	234.649	0.437889	-1.19136	0.243737	7.45131e-08	2.11178e-06	319.53	344.605	135.687	138.774
Keg1	88.7255	3.78644	1.92084	0.397195	7.48325e-08	2.11675e-06	33.9427	34.4605	138.348	148.151
BC021767	74.5594	4.31552	2.10953	0.437568	7.84033e-08	2.2135e-06	26.9201	24.3251	124.158	122.834
H6pd	6338.18	1.44069	0.526756	0.103036	7.87879e-08	2.2201e-06	5101.94	5184.28	7803.35	7263.14
Sytl2	1399.22	1.67518	0.744315	0.149037	8.10253e-08	2.27878e-06	925.817	1126.05	1641.55	1903.46
Fer1l6	426.962	1.91187	0.934986	0.189744	8.17748e-08	2.29547e-06	285.587	284.806	555.165	582.289
Eif2s2	3498.94	0.67396	-0.569266	0.112326	8.33008e-08	2.33385e-06	4385.63	4042.02	2695.12	2873
Fkbp11	857.016	0.587736	-0.766759	0.154262	8.5262e-08	2.38425e-06	1169.27	1015.57	607.489	635.736
Tyro3	424.545	0.520989	-0.940676	0.191705	8.79437e-08	2.45458e-06	596.924	536.165	283.791	281.299
Wnk4	1703.63	1.57743	0.657572	0.131078	8.82853e-08	2.45529e-06	1212.57	1390.58	2171	2040.36
Ccng1	1741.12	1.53812	0.621167	0.123367	8.83031e-08	2.45529e-06	1372.92	1333.82	2065.46	2192.26
Insig1	3321.48	0.649151	-0.623374	0.123978	8.93798e-08	2.48054e-06	3814.46	4313.65	2393.6	2764.23
Aifm1	1709.69	1.54047	0.623372	0.124	9.12734e-08	2.5259e-06	1367.07	1288.22	2052.16	2131.31
mt-Rnr1	9856.34	0.656279	-0.60762	0.120806	9.13576e-08	2.5259e-06	12009.9	12002.4	6843.79	8569.31
Cgas	64.0223	163.622	7.35422	1.32581	9.20039e-08	2.539e-06	0	1.01354	130.366	124.709
Map1lc3b	5643.13	1.4717	0.557479	0.110181	9.39623e-08	2.58819e-06	4426.6	4604.53	7189.66	6351.73
Stag2	3936.64	1.49874	0.583754	0.115905	9.51629e-08	2.61636e-06	3219.88	3004.15	4457.29	5065.26
Zfp398	393.481	2.02884	1.02065	0.209285	9.5407e-08	2.61818e-06	234.088	268.589	483.331	587.915
Krcc1	1709.46	1.63628	0.710415	0.142685	1.00159e-07	2.73837e-06	1406.87	1144.29	2018.46	2268.21
Tns3	3720.5	1.47329	0.559043	0.110801	1.00043e-07	2.73837e-06	2860.55	3088.27	4597.41	4335.76
Ephx2	230.173	0.436613	-1.19557	0.248183	1.04958e-07	2.86423e-06	346.45	306.091	131.253	136.899
Cdkn3	253.996	2.26246	1.17789	0.244074	1.05409e-07	2.87122e-06	141.623	157.099	328.133	389.13
Tapbp	2885.99	1.49305	0.578263	0.1155	1.15722e-07	3.14632e-06	2165.31	2408.18	3503.93	3466.54
Grn	3018.64	1.55729	0.639035	0.128634	1.18908e-07	3.22697e-06	2077.53	2573.39	3711.45	3712.21
Trf	61805.3	1.46236	0.548296	0.110331	1.19613e-07	3.24013e-06	45030.3	54058.4	72991.8	75140.6
B630019K06Rik	69.3018	4.69612	2.23147	0.472176	1.20245e-07	3.25125e-06	26.9201	17.2303	105.535	127.522
Ssh3	1186.15	1.62216	0.697917	0.14146	1.2147e-07	3.27602e-06	937.521	841.242	1554.64	1411.18
Mogat2	240.352	0.448896	-1.15555	0.24096	1.21606e-07	3.27602e-06	327.723	347.646	146.33	139.712
Pdhx	1254	0.627903	-0.671386	0.135888	1.23044e-07	3.3087e-06	1629.25	1483.83	925.867	977.045
Ramp1	105.203	0.261307	-1.93618	0.410327	1.2334e-07	3.31059e-06	215.361	125.68	47.8897	31.8806
Gm21411	33.22	18.3142	4.19489	0.864664	1.25525e-07	3.3631e-06	4.68175	1.01354	54.9844	72.2001
Gstcd	1896.82	0.659999	-0.599463	0.12057	1.27067e-07	3.39325e-06	2354.92	2256.15	1520.94	1455.25
Utp14b	478.334	0.519875	-0.943762	0.19527	1.27111e-07	3.39325e-06	578.196	699.346	293.546	342.247
Zfx	878.269	1.64717	0.719987	0.14668	1.31732e-07	3.51023e-06	635.548	666.912	1103.24	1107.38
Ccdc71l	498.122	1.84387	0.882735	0.182181	1.32739e-07	3.53065e-06	360.495	322.307	674.889	634.798
Ubl4a	1483.56	1.58755	0.666806	0.135252	1.35744e-07	3.60406e-06	1166.93	1090.57	1960.82	1715.92
9430018G01Rik	299.651	2.08644	1.06104	0.221344	1.3675e-07	3.62425e-06	196.634	178.384	403.515	420.073
Fam193b	1760.83	1.52525	0.609042	0.122942	1.38716e-07	3.66972e-06	1355.37	1395.65	2084.09	2208.2
Mpp6	2653.38	1.50757	0.592223	0.119497	1.43834e-07	3.7983e-06	1959.31	2217.64	3150.08	3286.51
Taz	1081.23	1.67303	0.742464	0.152463	1.44814e-07	3.81732e-06	878.999	707.454	1382.59	1355.86
Aip	4023.87	0.634293	-0.656778	0.133715	1.47944e-07	3.89286e-06	5595.87	4353.17	3189.98	2956.45
Tacc1	269.652	2.26023	1.17647	0.247201	1.48926e-07	3.9117e-06	132.26	184.465	384.004	377.878
Bbs1	69.0749	0.202114	-2.30676	0.493392	1.50211e-07	3.93841e-06	111.192	123.652	29.2659	12.1896
Deptor	1820.64	1.55468	0.636617	0.129491	1.50605e-07	3.94172e-06	1300.36	1506.13	2280.08	2196.01
Palm3	93.3247	0.286317	-1.80432	0.385036	1.50926e-07	3.9431e-06	147.475	148.991	33.7001	43.1325
Pkp3	289.475	2.09478	1.0668	0.223514	1.51291e-07	3.94562e-06	182.588	178.384	410.61	386.317
Tmem117	178.369	2.57098	1.36232	0.28862	1.588e-07	4.13413e-06	80.7602	108.449	259.846	264.421
Plod2	1310.26	0.627722	-0.671803	0.137398	1.59252e-07	4.13858e-06	1702.99	1550.72	941.83	1045.49
Mdh2	6723.9	0.703547	-0.507282	0.101717	1.59661e-07	4.14189e-06	7690.95	8203.63	5525.05	5475.95
1810037I17Rik	3052.71	0.671457	-0.574633	0.116369	1.62837e-07	4.21683e-06	3876.49	3490.65	2344.82	2498.87
Rasl11a	78.9146	0.257873	-1.95527	0.419339	1.65073e-07	4.26723e-06	136.941	119.598	31.9264	27.1922
Cys1	116.584	3.15991	1.65988	0.354214	1.66274e-07	4.29075e-06	44.4767	59.7991	194.219	167.842
1110012L19Rik	590.154	1.79791	0.846323	0.176018	1.6832e-07	4.33592e-06	449.448	373.998	779.537	757.632
Ube2d3	8509.5	0.672012	-0.57344	0.116711	1.78382e-07	4.58709e-06	11230.4	9304.34	6577.73	6925.58
Cdh9	45.5813	0.152885	-2.70948	0.583889	1.79424e-07	4.60585e-06	76.0785	85.1378	7.98161	13.1273
Slc7a11	729.955	0.507231	-0.979284	0.206126	1.80548e-07	4.62663e-06	776.001	1191.93	438.989	512.902
Fbxo31	1061.83	1.61117	0.688111	0.141539	1.81015e-07	4.63052e-06	836.863	762.186	1352.44	1295.85
Scara3	3610.99	1.45984	0.545809	0.110675	1.86794e-07	4.77005e-06	3008.03	2798.4	4438.66	4198.86
Ripor1	1325.25	1.62498	0.700424	0.144473	1.87468e-07	4.77211e-06	889.533	1092.6	1677.02	1641.85
Larp7	1352.77	0.645552	-0.631394	0.129418	1.87523e-07	4.77211e-06	1647.98	1672.35	1067.76	1022.99
Ptgs1	591.001	1.82817	0.870399	0.182127	1.89835e-07	4.8226e-06	366.347	446.973	723.666	827.019
Itm2c	2736.86	0.682585	-0.55092	0.112013	1.9463e-07	4.93588e-06	3353.31	3204.83	2174.55	2214.76
Hspb1	696.917	0.544928	-0.875862	0.184691	1.9642e-07	4.9727e-06	791.216	1040.91	440.762	514.777
Fkbp9	4639.44	0.692728	-0.529639	0.107469	1.96967e-07	4.978e-06	5272.82	5772.14	3743.38	3769.41
Tmbim6	15397.9	1.46507	0.550971	0.111926	1.97565e-07	4.98454e-06	11231.5	13469	18411.8	18479.5
Efnb1	754.948	1.70587	0.770507	0.160295	1.98181e-07	4.99152e-06	516.163	575.693	1012.78	915.16
Kcnq1ot1	164.304	3.09556	1.6302	0.351359	1.99313e-07	5.01144e-06	81.9307	67.9075	178.256	329.12
Areg	306.08	0.417353	-1.26066	0.270012	2.06918e-07	5.19378e-06	337.086	543.26	149.877	194.096
Csde1	12178.1	0.683133	-0.549762	0.11215	2.07511e-07	5.19979e-06	13299.7	15875.2	9792.55	9745.14
Dynlt3	1672.18	1.76001	0.815581	0.170828	2.08566e-07	5.21735e-06	1410.38	956.786	2031.76	2289.77
Slc12a7	2973.13	1.47757	0.563222	0.115086	2.1523e-07	5.37491e-06	2251.92	2489.27	3505.7	3645.64
Rab11fip5	468.746	1.98845	0.991643	0.21054	2.2496e-07	5.60837e-06	276.223	330.416	725.44	542.907
Gal3st1	241.465	2.22249	1.15218	0.246984	2.37861e-07	5.91995e-06	129.919	157.099	344.096	334.746
P4hb	47795.7	1.37726	0.461802	0.0935998	2.38733e-07	5.93162e-06	39305.7	40438.4	56986.9	54452
Zfp9	139.121	0.356086	-1.4897	0.323081	2.41953e-07	6.0015e-06	186.1	233.115	75.3819	61.8858
Zxdb	88.6668	3.53776	1.82284	0.397267	2.49618e-07	6.18119e-06	38.6245	33.447	141.008	141.587
Zswim8	1663.81	1.54242	0.625198	0.129522	2.51679e-07	6.22177e-06	1204.38	1373.35	2052.16	2025.35
Gmip	664.251	1.70109	0.766457	0.161625	2.73509e-07	6.75006e-06	470.516	491.569	824.766	870.152
Hist1h4i	185.165	2.77846	1.47429	0.321632	2.74106e-07	6.75347e-06	117.044	67.9075	316.604	239.104
Nfkbia	2498.46	0.661361	-0.596491	0.123732	2.75863e-07	6.78541e-06	3210.51	2861.24	2064.58	1857.51
Ddit3	537.475	0.523937	-0.932535	0.199753	2.89426e-07	7.10712e-06	602.776	830.093	348.53	368.502
B2m	5957.87	0.707395	-0.499412	0.102564	2.96756e-07	7.27497e-06	7239.16	6816.09	4841.29	4934.92
Rab27b	1680.67	1.51871	0.602845	0.125658	3.01807e-07	7.38648e-06	1285.14	1344.97	1969.68	2122.87
Sdc3	58.5774	5.0105	2.32496	0.512758	3.13201e-07	7.6526e-06	16.3861	18.2438	115.29	84.3897
Il18r1	32.1057	18.1328	4.18053	0.890498	3.17135e-07	7.73587e-06	0	5.06772	72.7213	50.6338
Ugt2b36	769.467	1.65638	0.728031	0.154125	3.23785e-07	7.88502e-06	567.663	567.585	936.509	1006.11
Tmem56	278.864	0.484765	-1.04464	0.226456	3.28165e-07	7.97848e-06	366.347	398.323	178.256	172.53
Pof1b	34.2994	13.2668	3.72975	0.815395	3.28991e-07	7.98535e-06	7.02263	1.01354	53.2107	75.9507
Rbm10	3060.5	1.49802	0.583054	0.121718	3.3997e-07	8.23825e-06	2534	2301.76	3950.01	3456.23
Hsd17b7	1018.23	0.629862	-0.666891	0.140908	3.50108e-07	8.46997e-06	1292.16	1234.5	752.045	794.201
Khnyn	789.386	1.67228	0.741816	0.158009	3.63123e-07	8.7704e-06	567.663	588.87	932.075	1068.94
Fam20a	22.9499	0.00385938	-8.01741	2.78397	3.71765e-07	8.96441e-06	42.1358	49.6637	0	0
Gm4544	61.5937	0.222692	-2.16688	0.484346	3.87945e-07	9.33926e-06	117.044	89.1919	19.5106	20.6286
B3glct	65.708	0.226458	-2.14268	0.479465	4.03455e-07	9.69676e-06	101.828	117.571	27.4922	15.9403
Sesn3	1219.39	1.56459	0.645783	0.13687	4.07472e-07	9.77733e-06	883.681	986.179	1511.18	1496.51
Cdkn2b	200.092	2.36057	1.23913	0.274018	4.37565e-07	1.04823e-05	100.658	125.68	307.735	266.296
2610001J05Rik	4280.67	1.4342	0.520241	0.10898	4.52663e-07	1.08264e-05	3574.52	3383.21	4881.2	5283.73
H2afj	746.707	1.94993	0.963424	0.210907	4.60169e-07	1.0988e-05	368.688	609.14	1054.46	954.541
Ndufs8	3258.67	0.669885	-0.578015	0.122331	4.67561e-07	1.11464e-05	4258.05	3620.38	2666.74	2489.5
Ikbke	1561.5	1.54543	0.628012	0.133769	4.72385e-07	1.12432e-05	1301.53	1113.89	1927.12	1903.46
Jdp2	404.839	0.540008	-0.888947	0.194177	4.74899e-07	1.12848e-05	513.822	554.409	282.017	269.109
Tipin	1423.48	0.655349	-0.609665	0.129651	4.76653e-07	1.13082e-05	1680.75	1792.96	1082.84	1137.39
Adh5	7424.62	0.694901	-0.52512	0.110569	4.94384e-07	1.171e-05	9447.78	8213.77	6183.09	5853.83
Rps13-ps2	173.679	0.405847	-1.30099	0.290681	5.02643e-07	1.18865e-05	243.451	261.495	108.195	81.5767
Tmem106b	6407.19	1.45522	0.541242	0.114392	5.16256e-07	1.21888e-05	5559.58	4754.54	7399.84	7914.82
Gstm7	98.6963	0.314281	-1.66987	0.376748	5.19329e-07	1.22417e-05	147.475	160.14	49.6634	37.5065
Ccdc120	400.521	1.8647	0.898947	0.197172	5.22397e-07	1.22943e-05	256.326	285.82	517.031	542.907
Irf6	222.664	2.19287	1.13282	0.251722	5.23767e-07	1.23069e-05	131.089	135.815	323.699	300.052
Dnajc5	3008.26	0.683661	-0.548647	0.116275	5.30091e-07	1.24356e-05	3389.59	3818.02	2434.39	2391.04
Stard5	222.564	0.434886	-1.20129	0.268428	5.33633e-07	1.24987e-05	364.006	269.603	135.687	120.959
F730043M19Rik	205.558	0.439785	-1.18513	0.264749	5.39938e-07	1.26263e-05	286.757	295.955	107.308	132.211
Aldh1a1	774.293	0.605865	-0.722932	0.156629	5.42276e-07	1.26609e-05	1006.58	946.651	540.089	603.855
Thsd7a	85.9502	0.282499	-1.82368	0.413649	5.4784e-07	1.27705e-05	159.18	115.544	38.1344	30.9429
Idh3g	3341.85	1.4552	0.541213	0.114709	5.51633e-07	1.28386e-05	2700.2	2678.8	4230.25	3758.16
Pcdh7	35.306	8.80574	3.13844	0.708506	5.83711e-07	1.35637e-05	7.02263	5.06772	70.0608	59.0728
Rps4x	34053.1	1.43656	0.522617	0.111375	5.90693e-07	1.36827e-05	25056.7	30140.8	41335.9	39679.1
Ndufc2	2004.24	0.602751	-0.730366	0.15902	5.89942e-07	1.36827e-05	2974.08	2093.98	1473.94	1474.94
Il13ra2	151.859	2.88469	1.52842	0.346951	6.0892e-07	1.40827e-05	93.6351	52.7043	200.427	260.67
Dnajc10	6796.73	0.711046	-0.491984	0.104292	6.28612e-07	1.45153e-05	7895.78	8110.39	5333.49	5847.27
C4a	67.3639	4.09484	2.03381	0.46424	6.4273e-07	1.48181e-05	22.2383	25.3386	120.611	101.268
Wdr45	431.015	1.88669	0.915855	0.203525	6.63932e-07	1.52829e-05	327.723	251.359	571.129	573.85
Cry1	304.931	0.466742	-1.0993	0.247173	6.67991e-07	1.53523e-05	388.585	459.136	151.651	220.351
Enpp5	208.369	0.426138	-1.23061	0.278483	6.8098e-07	1.56264e-05	255.156	341.565	106.421	130.335
Pabpn1	588.269	1.85882	0.894387	0.198666	6.89629e-07	1.57856e-05	327.723	469.271	744.063	812.017
Prag1	1230.6	1.62157	0.697388	0.152162	6.90065e-07	1.57856e-05	866.124	974.017	1699.2	1383.05
Suv39h1	1836.15	1.53112	0.614589	0.132858	6.93167e-07	1.58074e-05	1299.19	1555.79	2272.99	2216.64
Gstp-ps	1516.64	0.621872	-0.685311	0.149439	6.92498e-07	1.58074e-05	1674.9	2110.2	1208.77	1072.69
Tmem94	1230.69	1.62861	0.703641	0.153933	7.18603e-07	1.63621e-05	812.284	1021.65	1633.57	1455.25
Aatf	1631.89	1.53791	0.620974	0.134528	7.22883e-07	1.64088e-05	1199.7	1330.78	2130.2	1866.89
Kctd5	2048.22	0.672375	-0.572662	0.123455	7.21869e-07	1.64088e-05	2590.18	2355.48	1684.12	1563.09
Tiam1	20.8443	0.00439501	-7.82992	2.77486	7.2957e-07	1.65351e-05	39.7949	43.5824	0	0
G6pc3	565.647	1.7308	0.791443	0.175406	7.8088e-07	1.76707e-05	373.37	433.797	733.421	722.001
Adamts9	324.191	0.490896	-1.02651	0.23165	7.82111e-07	1.76714e-05	379.222	506.772	195.106	215.663
Bach1	657.093	1.6689	0.738897	0.162997	7.89024e-07	1.77983e-05	467.005	495.623	859.353	806.391
Tmem68	643.532	0.528201	-0.920842	0.206643	7.90146e-07	1.77983e-05	1028.82	685.156	403.515	456.642
Anxa1	7373.67	1.41239	0.498134	0.106571	7.93815e-07	1.78536e-05	6355.48	5743.76	8412.62	8982.82
Snhg1	3103.66	0.677405	-0.561909	0.121518	7.98376e-07	1.79287e-05	3814.46	3654.84	2272.99	2672.34
Srpr	2582.79	0.663178	-0.592533	0.128693	8.03454e-07	1.79947e-05	2878.11	3395.38	2136.41	1921.27
Aif1l	70.5744	0.266667	-1.90689	0.441189	8.03762e-07	1.79947e-05	108.851	119.598	25.7185	28.1299
mt-Nd6	11853.4	1.39468	0.479931	0.102499	8.09901e-07	1.81046e-05	9534.39	10071.6	13253	14554.4
Ldhd	235.065	2.13837	1.09651	0.248498	8.11958e-07	1.8123e-05	134.6	152.032	342.322	311.304
Erap1	1070.45	1.55811	0.639798	0.140139	8.53236e-07	1.90155e-05	855.59	789.551	1342.68	1293.98
Srgap3	54.4017	0.212776	-2.23259	0.519264	8.577e-07	1.90861e-05	78.4194	105.409	15.9632	17.8156
Ltbp1	3517.96	1.45035	0.5364	0.116063	8.94256e-07	1.98695e-05	2638.17	3032.53	4227.59	4173.54
Bphl	857.694	1.61381	0.690473	0.152509	8.97644e-07	1.99147e-05	684.706	602.046	1054.46	1089.57
mt-Nd5	38861.8	1.37719	0.461726	0.0991521	9.09749e-07	2.01529e-05	31030.7	33732.8	43832.3	46851.3
Jag1	961.065	0.621533	-0.686097	0.151715	9.31919e-07	2.06129e-05	1130.64	1268.96	675.776	768.884
Timm17b	1151.98	1.56646	0.647508	0.142582	9.38373e-07	2.07245e-05	932.839	831.107	1488.13	1355.86
Mlxipl	25.6844	0.037028	-4.75524	1.04966	9.42682e-07	2.07885e-05	58.5219	41.5553	2.66054	0
Uchl3	1248.16	0.64634	-0.629634	0.138618	9.58051e-07	2.10958e-05	1608.18	1458.49	916.111	1009.86
Pcolce	2624.65	1.43588	0.52193	0.113071	9.6394e-07	2.11937e-05	2070.51	2188.24	3114.6	3125.23
1110051M20Rik	91.133	0.318337	-1.65137	0.384598	9.70605e-07	2.13084e-05	141.623	141.896	42.5686	38.4442
Cisd2	1810.52	0.662975	-0.592974	0.129996	9.79169e-07	2.14644e-05	2367.8	2032.16	1422.5	1419.62
Rcor2	422.589	0.534448	-0.903878	0.204762	9.9496e-07	2.17781e-05	495.095	625.357	297.98	271.922
Hgsnat	1469.43	1.50189	0.586779	0.128574	1.00252e-06	2.19109e-05	1116.6	1197	1749.75	1814.38
Ngly1	1026.25	1.57099	0.651677	0.144351	1.05091e-06	2.29345e-05	832.182	735.834	1282.38	1254.59
Zdhhc1	443.846	1.82223	0.865705	0.196013	1.05415e-06	2.2971e-05	337.086	273.657	587.979	576.663
Ftsj1	731.448	1.6243	0.699814	0.15589	1.06945e-06	2.327e-05	529.038	562.517	913.451	920.786
Snn	707.837	0.601165	-0.734168	0.164469	1.07333e-06	2.332e-05	962.1	831.107	537.428	500.712
Pkn2	4035.45	0.696599	-0.5216	0.113985	1.14437e-06	2.48268e-05	4641.96	4952.18	3077.35	3470.29
Wdr47	425.172	0.545239	-0.875039	0.19942	1.16115e-06	2.51537e-05	577.026	542.246	260.733	320.681
Gm8129	423.776	0.537018	-0.896958	0.20488	1.1744e-06	2.53934e-05	601.605	520.962	317.491	255.044
Apol9b	78.3989	0.287505	-1.79834	0.423993	1.17567e-06	2.53934e-05	110.021	139.869	33.7001	30.0052
Tcf25	6960.88	1.40651	0.492119	0.107113	1.18846e-06	2.5632e-05	5435.52	6011.33	8480.9	7915.76
Kank1	83.5016	0.268169	-1.89879	0.448827	1.19115e-06	2.56524e-05	94.8055	175.343	31.0396	32.8182
Abhd17c	1392.19	1.49786	0.582901	0.128816	1.2209e-06	2.62471e-05	1076.8	1118.95	1714.27	1658.73
Dhx9	8516.71	0.732501	-0.449097	0.0972832	1.22233e-06	2.62471e-05	9827	9965.17	7124.03	7150.62
Myo15b	1784.26	1.51111	0.595606	0.131853	1.23169e-06	2.63329e-05	1289.82	1507.14	2100.94	2239.14
Mthfd2	1217.83	0.612041	-0.708301	0.159239	1.23017e-06	2.63329e-05	1329.62	1732.15	951.585	857.962
Pycr1	535.326	0.507122	-0.979596	0.225534	1.22871e-06	2.63329e-05	585.219	862.527	398.194	295.364
Macrod1	1520.4	1.48602	0.571453	0.126177	1.25153e-06	2.67181e-05	1218.43	1192.94	1878.34	1791.87
Cul4b	1739.88	1.47798	0.563623	0.124465	1.27522e-06	2.71843e-05	1406.87	1362.2	2012.25	2178.19
Sgsm2	686.121	1.67361	0.74296	0.167826	1.27876e-06	2.72203e-05	455.3	546.301	887.732	855.149
Capn2	2795.79	1.44993	0.535984	0.118216	1.28143e-06	2.72378e-05	2105.62	2397.03	3344.29	3336.21
Cybb	148.228	2.60825	1.38308	0.32527	1.30965e-06	2.77974e-05	93.6351	60.8127	219.051	219.413
Eif4e3	340.704	1.96862	0.977184	0.225534	1.32052e-06	2.79878e-05	209.508	232.102	401.741	519.466
Rab7b	170.54	2.35572	1.23617	0.289752	1.36868e-06	2.89668e-05	106.51	86.1513	244.769	244.73
Lrrc45	610.299	1.65813	0.729558	0.165266	1.3883e-06	2.93399e-05	456.471	440.892	777.764	766.071
Ankrd13c	2938.91	0.701966	-0.510526	0.11248	1.41913e-06	2.99483e-05	3395.44	3568.69	2322.65	2468.87
Fbxw17	223.702	2.13098	1.09151	0.254791	1.43324e-06	3.01305e-05	148.646	124.666	313.943	307.554
Atp5f1	8456.24	0.729475	-0.455069	0.099635	1.43021e-06	3.01305e-05	9876.16	9821.25	6843.79	7283.77
2410004B18Rik	983.665	0.634912	-0.655372	0.14751	1.43391e-06	3.01305e-05	1243.01	1192.94	697.947	800.765
Sms	3311.26	0.703904	-0.50655	0.11161	1.44131e-06	3.02428e-05	3856.59	3980.19	2588.7	2819.55
Ddx20	1333.14	0.661128	-0.596999	0.133397	1.45383e-06	3.04621e-05	1541.47	1702.76	1060.67	1027.68
Rora	59.7143	4.17565	2.062	0.491941	1.48501e-06	3.10712e-05	18.727	22.298	98.4399	99.3923
Mcc	578.946	0.596504	-0.745396	0.170028	1.50509e-06	3.14466e-05	702.263	769.281	419.478	424.762
Dennd6b	386.211	1.81406	0.859222	0.197949	1.51356e-06	3.15786e-05	264.519	267.576	522.352	490.398
Gpr137b-ps	424.668	1.78415	0.835239	0.192092	1.53028e-06	3.18822e-05	279.735	312.172	550.731	556.034
Ngf	714.442	0.601914	-0.732371	0.167116	1.5738e-06	3.27427e-05	832.182	977.057	552.505	496.024
Bcas2	2350.8	0.695105	-0.524697	0.116465	1.57965e-06	3.28178e-05	2744.68	2851.1	1840.2	1967.22
Krtcap3	177.99	2.39704	1.26125	0.298728	1.61256e-06	3.33603e-05	118.214	80.07	248.317	265.359
Hddc2	674.907	1.63711	0.711148	0.161888	1.61143e-06	3.33603e-05	477.539	522.989	833.635	865.463
Enpp2	974.243	0.601257	-0.733947	0.167824	1.6085e-06	3.33603e-05	1403.36	1066.25	748.498	678.868
Asic1	273.131	1.99737	0.998104	0.233535	1.67235e-06	3.45486e-05	177.907	172.303	398.194	344.123
Nisch	5128.91	1.47159	0.557377	0.12464	1.69251e-06	3.4916e-05	3630.7	4550.82	6151.16	6182.95
9530036O11Rik	63.0705	4.67775	2.22581	0.538666	1.70816e-06	3.51896e-05	29.261	10.1354	97.553	115.333
Cdk14	104.806	0.336697	-1.57048	0.376642	1.71446e-06	3.527e-05	132.26	189.533	50.5502	46.8832
Cyb561	1277.58	1.5521	0.63422	0.143584	1.72527e-06	3.54428e-05	1069.78	896.987	1627.36	1516.2
Slc2a6	364.625	1.89506	0.922243	0.215409	1.7683e-06	3.62761e-05	273.883	212.844	501.068	470.707
Vegfa	3953.18	0.679573	-0.557299	0.124994	1.77168e-06	3.62948e-05	4263.91	5242.05	3092.43	3214.31
Atp10d	18.3889	0.00524301	-7.57539	2.76752	1.8312e-06	3.74619e-05	42.1358	31.4199	0	0
Gm19385	53.4408	0.206843	-2.27339	0.552204	1.83763e-06	3.75412e-05	117.044	64.8669	16.8501	15.0026
Ptms	10950.4	1.39302	0.47822	0.106179	1.88823e-06	3.85215e-05	8583.99	9526.31	13400.2	12290.9
Mcm10	1412.26	0.661357	-0.596499	0.135114	1.8934e-06	3.85735e-05	1663.19	1774.72	1175.96	1035.18
Nid1	5148.38	1.42108	0.506988	0.113108	1.90475e-06	3.8751e-05	4370.42	4035.94	6473.97	5713.18
Ccdc163	163.902	0.418184	-1.25779	0.300724	1.90995e-06	3.88031e-05	203.656	269.603	90.4582	91.891
Dock8	45.5247	0.193064	-2.37285	0.576804	1.9215e-06	3.89839e-05	64.3741	92.2326	13.3027	12.1896
Map3k5	1488.94	1.53368	0.616998	0.140122	1.94422e-06	3.93906e-05	1040.52	1267.94	1803.84	1843.45
Hprt	1890.47	1.48064	0.566225	0.127006	1.96933e-06	3.98445e-05	1479.43	1527.41	2129.32	2425.74
Rps16-ps2	356.503	0.529125	-0.918319	0.215892	1.98166e-06	4.00388e-05	512.652	437.851	259.846	215.663
Ephb6	423.362	1.78624	0.836925	0.195257	1.99302e-06	4.0213e-05	307.825	281.765	519.692	584.164
Rnasel	684.705	1.65098	0.723324	0.166806	2.0023e-06	4.0345e-05	544.254	465.217	894.827	834.521
Phlda1	735.076	0.620556	-0.688367	0.158265	2.03221e-06	4.08916e-05	891.874	946.651	523.239	578.538
Gm10076	1149.17	0.595281	-0.748357	0.173429	2.0403e-06	4.09984e-05	1698.31	1227.4	899.261	771.697
Snhg12	2059.92	0.695847	-0.523158	0.117624	2.07872e-06	4.17133e-05	2503.57	2399.06	1686.78	1650.29
Rab31	4687.66	0.721117	-0.471694	0.105144	2.08246e-06	4.17314e-05	5364.12	5612	3986.37	3788.16
Tmem176a	13741.2	1.34837	0.431212	0.0953977	2.09444e-06	4.19145e-05	11459.8	11748	16082.9	15674
Zfp978	75.0516	4.13746	2.04875	0.498853	2.1347e-06	4.26621e-05	12.8748	38.5147	125.045	123.772
Csnk1e	1775.8	0.681739	-0.55271	0.125084	2.16236e-06	4.31563e-05	2065.82	2199.39	1478.37	1359.61
Gm49327	24.3043	0.052367	-4.2552	1.00236	2.2094e-06	4.40354e-05	40.9653	52.7043	3.54738	0
Rex2	28.0125	12.3081	3.62154	0.868833	2.24941e-06	4.47721e-05	4.68175	2.02709	43.4554	61.8858
Myo1c	7805.32	1.41184	0.497576	0.111978	2.35347e-06	4.67801e-05	6019.56	6774.53	9732.24	8694.95
Eif4g2	27534.6	0.744175	-0.426286	0.0947762	2.37804e-06	4.72046e-05	30966.3	32570.3	23677.9	22924
Gm49172	353.759	1.9947	0.996174	0.237554	2.3822e-06	4.72233e-05	201.315	251.359	403.515	558.847
Gm379	33.6529	7.5137	2.90952	0.710255	2.40202e-06	4.75522e-05	7.02263	6.08127	55.8713	65.6364
Arhgap24	76.2898	3.37629	1.75544	0.429924	2.41201e-06	4.76792e-05	33.9427	29.3928	116.177	125.647
Dtx3	880.425	0.641245	-0.641051	0.147637	2.41492e-06	4.76792e-05	1128.3	1043.95	684.645	664.803
Slc7a3	59.436	4.12409	2.04408	0.502066	2.45309e-06	4.8368e-05	18.727	22.298	85.1372	111.582
Hoxb6	34.4541	0.0102038	-6.61475	1.38099	2.47894e-06	4.88122e-05	60.8628	76.0159	0	0.937664
Prr13	3327.77	1.3975	0.482847	0.108705	2.49041e-06	4.89725e-05	2775.11	2716.3	4000.56	3819.1
Gm14303	413.014	0.486881	-1.03836	0.249503	2.50845e-06	4.92613e-05	706.945	428.729	282.904	233.478
Taf13	644.793	0.608906	-0.71571	0.167207	2.56585e-06	5.03215e-05	869.636	757.118	478.897	473.52
Gprin3	62.4671	0.263949	-1.92167	0.474774	2.60482e-06	5.10178e-05	110.021	93.2461	21.2843	25.3169
Arsb	977.417	1.53728	0.620376	0.143143	2.62714e-06	5.12501e-05	778.341	734.82	1230.05	1166.45
Eif2s3x	2962.78	1.43004	0.516057	0.117201	2.62204e-06	5.12501e-05	2319.81	2494.33	3701.69	3335.27
Rasef	952.167	0.639507	-0.644969	0.149458	2.62415e-06	5.12501e-05	1131.81	1220.31	681.097	775.448
Atp5c1	7937.89	0.733515	-0.447101	0.100504	2.70099e-06	5.26211e-05	9500.45	8944.53	6542.26	6764.3
Wnt7b	43.8259	5.53786	2.46933	0.610732	2.70547e-06	5.26386e-05	12.8748	10.1354	91.3451	60.9481
Tiam2	870.096	0.625291	-0.677401	0.157891	2.72586e-06	5.29653e-05	991.361	1178.75	681.097	629.172
Clic5	27.2504	12.0432	3.59014	0.871211	2.86922e-06	5.56772e-05	3.51131	3.04063	61.1923	41.2572
Fam13a	127.204	2.69418	1.42985	0.351363	2.90025e-06	5.62052e-05	51.4993	76.0159	169.388	211.912
Rassf4	200.705	0.454523	-1.13758	0.27721	2.9188e-06	5.64904e-05	273.883	290.887	100.214	137.837
P2rx4	1371.65	1.49861	0.583625	0.134578	2.92879e-06	5.66091e-05	1150.54	1010.5	1658.4	1667.17
Fcsk	1177.75	1.53762	0.620698	0.144255	3.0178e-06	5.82029e-05	873.147	948.678	1550.21	1338.98
Foxa3	311.877	0.526977	-0.924188	0.222426	3.01916e-06	5.82029e-05	448.278	385.147	219.051	195.034
Lamb3	1379.06	1.54456	0.627194	0.146178	3.12201e-06	5.99989e-05	1151.71	976.044	1820.69	1567.77
Rnf41	1567.17	0.676399	-0.564053	0.130282	3.12456e-06	5.99989e-05	1886.75	1892.29	1323.17	1166.45
Scn8a	178.445	0.454351	-1.13812	0.278327	3.12287e-06	5.99989e-05	263.349	239.197	109.969	101.268
Col18a1	6716.6	0.726558	-0.46085	0.104395	3.13191e-06	6.00616e-05	7792.78	7880.31	5867.37	5325.93
Rpl22l1	3482.18	1.50069	0.585627	0.135797	3.16095e-06	6.05397e-05	2699.03	2777.11	3673.31	4779.27
Gsta1	151.55	0.422134	-1.24423	0.306409	3.23022e-06	6.17858e-05	229.406	207.777	94.0056	75.0131
Myo1d	1664.09	1.46027	0.546239	0.125936	3.24274e-06	6.19448e-05	1271.1	1394.64	2014.03	1976.59
Taldo1	4723.34	0.719421	-0.475092	0.108297	3.27633e-06	6.25052e-05	5657.9	5417.4	4093.68	3724.4
Prmt1	6412.82	0.719086	-0.475765	0.108574	3.29382e-06	6.27575e-05	7960.15	7081.64	5452.33	5157.15
Lonp2	1898.76	1.44695	0.533012	0.122833	3.35837e-06	6.39047e-05	1592.97	1468.63	2326.2	2207.26
Cyp2ab1	48.054	4.6873	2.22876	0.558671	3.42557e-06	6.5099e-05	15.2157	14.1896	87.7977	75.0131
Tmprss2	1041.2	1.52692	0.610624	0.142767	3.48062e-06	6.60598e-05	855.59	763.199	1271.74	1274.28
Rad51d	827.541	1.57535	0.655668	0.154931	3.51358e-06	6.65995e-05	674.172	583.802	1020.76	1031.43
Uprt	470.163	1.71539	0.778533	0.186188	3.55637e-06	6.73239e-05	314.848	357.781	616.358	591.666
Abca3	1940.05	1.44612	0.532192	0.123209	3.66821e-06	6.93519e-05	1494.65	1632.82	2246.38	2386.35
Mocs2	1206.39	1.49129	0.576563	0.134504	3.6957e-06	6.97819e-05	942.203	962.868	1412.75	1507.76
Bin3	885.501	1.53539	0.618603	0.145552	3.83907e-06	7.2396e-05	683.536	687.183	1102.35	1068.94
Skap2	1620.42	1.47928	0.564896	0.131901	3.88516e-06	7.31713e-05	1370.58	1203.08	1884.55	2023.48
Ywhag	6776.73	0.713875	-0.486256	0.11208	3.90411e-06	7.34341e-05	7611.36	8337.42	5940.98	5217.16
2610002M06Rik	1048.15	1.51732	0.601524	0.141421	3.9624e-06	7.44353e-05	848.568	787.524	1317.85	1238.65
Nudt7	365.283	1.85768	0.893502	0.217764	3.99165e-06	7.48892e-05	277.394	215.885	454.952	512.902
Mrpl42	1148.66	0.670243	-0.577243	0.13545	4.02031e-06	7.52351e-05	1429.11	1353.08	916.998	895.469
Megf6	26.7729	0.106935	-3.22519	0.811646	4.01954e-06	7.52351e-05	57.3515	41.5553	4.43423	3.75065
Fbxl3	917.182	0.653496	-0.61375	0.144876	4.04069e-06	7.55204e-05	1159.9	1086.52	705.929	716.375
Bid	2832.59	0.696945	-0.520884	0.12109	4.07396e-06	7.60455e-05	3500.78	3240.3	2448.58	2140.69
Pgls	2611.91	1.46651	0.552388	0.129009	4.08803e-06	7.62115e-05	1944.1	2226.76	3370.01	2906.76
Klf4	1812.69	1.48518	0.570641	0.133287	4.17591e-06	7.77512e-05	1305.04	1566.94	2162.13	2216.64
B4galt2	503.305	0.599327	-0.738584	0.17779	4.24421e-06	7.8923e-05	656.616	622.317	358.286	376.003
Ecm1	807.778	1.61255	0.689344	0.164724	4.2579e-06	7.90775e-05	537.231	669.953	1039.38	984.547
Rpl9-ps6	208.313	0.468101	-1.09511	0.272369	4.3006e-06	7.97699e-05	328.893	252.373	118.837	133.148
Fam120c	516.233	1.67103	0.740737	0.178226	4.33428e-06	8.02933e-05	385.074	367.917	684.645	627.297
Fbxo32	360.084	1.86321	0.897787	0.220059	4.41162e-06	8.15207e-05	251.644	233.115	538.315	417.26
Kmt2d	2439.79	1.41571	0.501522	0.116562	4.40732e-06	8.15207e-05	1946.44	2042.29	2781.15	2989.27
Zfp319	480.161	1.68786	0.755192	0.182428	4.43693e-06	8.1783e-05	353.472	341.565	636.755	588.853
Rgs3	34.0182	0.158852	-2.65425	0.677798	4.43402e-06	8.1783e-05	67.8854	52.7043	7.98161	7.50131
Arf3	6953.82	1.39418	0.479414	0.111295	4.46773e-06	8.22477e-05	5451.9	6027.55	8642.31	7693.53
Pnpla6	2401.32	1.40625	0.491854	0.114252	4.51598e-06	8.30319e-05	1997.94	1946.01	2884.91	2776.42
Calcoco1	1381.6	1.55283	0.634897	0.151064	4.52713e-06	8.31329e-05	929.328	1190.92	1773.69	1632.47
Pls3	2389.48	1.43267	0.518705	0.121098	4.5555e-06	8.35497e-05	1818.86	2056.48	2775.83	2906.76
Ogt	4739.69	1.38261	0.467395	0.10821	4.67241e-06	8.55872e-05	3964.27	3907.22	5263.43	5823.83
Col8a1	73.0082	0.285484	-1.80852	0.462767	4.70885e-06	8.61473e-05	128.748	105.409	37.2475	20.6286
St3gal1	2139.35	1.45514	0.541163	0.127165	4.73297e-06	8.64811e-05	1580.09	1852.76	2614.42	2510.13
Tigit	312.483	0.516004	-0.954545	0.236351	4.75427e-06	8.67625e-05	359.325	482.447	191.559	216.6
Ocrl	855.645	1.53715	0.620261	0.147815	4.82297e-06	8.79072e-05	657.786	664.885	1022.53	1077.38
Ano6	2396.1	1.53746	0.620546	0.147938	4.87373e-06	8.87224e-05	1587.11	2115.27	2764.3	3117.73
Slc2a1	2379.63	0.681885	-0.552399	0.130502	4.89299e-06	8.89629e-05	2574.96	3145.03	1896.96	1901.58
C920009B18Rik	105.02	2.68293	1.42381	0.361298	4.90156e-06	8.90088e-05	53.8402	51.6908	156.085	158.465
Lrpap1	694.723	0.634227	-0.65693	0.157714	4.92702e-06	8.93608e-05	862.613	861.513	541.863	512.902
Prg4	275.934	46.1067	5.5269	1.47451	4.9394e-06	8.94749e-05	14.0453	1.01354	506.389	582.289
Mettl1	1289.3	0.653686	-0.613329	0.146375	4.97374e-06	8.99861e-05	1719.37	1439.23	1056.23	942.352
Ccar2	2071.62	1.4351	0.521154	0.12239	5.01601e-06	9.0636e-05	1649.15	1706.81	2596.68	2333.84
Evl	711.448	0.626503	-0.674606	0.162545	5.02198e-06	9.0636e-05	895.385	879.757	575.563	495.086
B3gnt3	3376.76	1.43564	0.52169	0.122803	5.08908e-06	9.17345e-05	2477.82	2987.93	4027.17	4014.14
Cavin1	21726.7	1.40742	0.493054	0.115724	5.12392e-06	9.22493e-05	16008.1	19622.2	26373.9	24902.5
Malsu1	961.793	1.53254	0.615922	0.147298	5.23263e-06	9.40913e-05	705.774	783.47	1134.28	1223.65
Zmiz2	2224.18	1.45875	0.544734	0.128823	5.27161e-06	9.46766e-05	1776.73	1786.88	2901.76	2431.36
Add2	707.765	1.57322	0.653723	0.157329	5.37466e-06	9.64095e-05	539.572	537.179	901.035	853.274
Ikbkb	1569.7	1.46676	0.552636	0.131009	5.38941e-06	9.65564e-05	1207.89	1297.34	1989.19	1784.37
Tnfrsf12a	12284	0.700367	-0.513818	0.12105	5.41924e-06	9.69728e-05	16264.4	12908.5	10123.3	9839.84
Tnfrsf1a	2590.54	1.39277	0.477955	0.111862	5.46965e-06	9.7756e-05	2141.9	2138.58	3076.47	3005.21
Rgl3	30.6502	0.0117517	-6.41098	1.40319	5.47748e-06	9.7777e-05	45.6471	76.0159	0	0.937664
Tdrd3	765.371	1.56856	0.649438	0.156574	5.48793e-06	9.78448e-05	613.31	553.395	920.546	974.232
Tanc1	1772.67	0.688632	-0.538194	0.127519	5.51098e-06	9.81368e-05	2006.13	2235.88	1373.72	1474.94
6720489N17Rik	177.474	0.416738	-1.26279	0.32234	5.63408e-06	0.000100208	308.996	205.75	79.8161	115.333
Kif5c	1400.54	0.67297	-0.571386	0.136394	5.64348e-06	0.000100254	1582.43	1804.11	1065.1	1150.51
Washc2	1975.22	1.42224	0.508164	0.120022	5.68047e-06	0.000100789	1574.24	1642.96	2273.87	2409.8
Prss22	145.139	0.409885	-1.28671	0.32892	5.74111e-06	0.000101742	246.962	176.357	86.9109	70.3248
Hs3st3b1	29.9112	0.0120436	-6.37559	1.39683	5.75323e-06	0.000101834	53.8402	64.8669	0	0.937664
Ccnd1	12792.4	0.718703	-0.476533	0.11205	5.79128e-06	0.000102385	15369	14659.9	11487.3	9653.25
Pmp22	24.6815	31.1254	4.96002	1.16368	5.80472e-06	0.000102499	0	2.02709	47.0028	49.6962
Hoxb3	16.2653	0.00637762	-7.29277	2.78187	5.8189e-06	0.000102626	46.8175	18.2438	0	0
Esrp2	931.179	1.53107	0.614543	0.147877	5.85368e-06	0.000103116	724.501	718.603	1206.11	1075.5
Atg2a	1423.41	1.46205	0.547994	0.130464	5.90579e-06	0.000103791	1094.36	1181.79	1755.95	1661.54
Emp1	19530.9	0.746178	-0.422409	0.0981824	5.90614e-06	0.000103791	22023	23013.5	15906.5	17180.8
Ctsb	5540.81	1.37031	0.454506	0.106366	5.96114e-06	0.000104633	4392.65	4858.93	6496.14	6415.49
Pik3c2g	481.448	1.7867	0.837295	0.207579	5.96897e-06	0.000104646	278.564	388.188	593.3	665.741
Kif3b	1577.46	0.69523	-0.524438	0.124538	6.01524e-06	0.000105331	1837.59	1921.68	1290.36	1260.22
Foxo4	891.119	1.5225	0.606443	0.146004	6.05905e-06	0.000105846	676.513	709.481	1107.67	1070.81
Angptl6	145.1	0.420401	-1.25016	0.319919	6.05653e-06	0.000105846	197.804	221.966	93.1188	67.5118
Slco3a1	1116.16	1.53078	0.614264	0.148265	6.17938e-06	0.00010782	924.646	805.768	1456.2	1278.04
Psmb10	1256.45	1.6125	0.689296	0.16841	6.2514e-06	0.000108948	1082.66	795.633	1705.4	1442.13
Dtnbp1	1328.39	1.46476	0.550666	0.13162	6.28667e-06	0.000109433	1102.55	1019.63	1611.4	1579.96
Anapc16	1806.52	0.701213	-0.512075	0.121653	6.31337e-06	0.000109768	2198.08	2090.94	1500.54	1436.5
Thsd4	1579.3	0.670943	-0.575738	0.138375	6.32575e-06	0.000109853	1770.87	2053.44	1167.98	1324.92
Map2k1	3056.32	0.726705	-0.460559	0.108414	6.41261e-06	0.00011123	3556.96	3579.84	2539.93	2548.57
Hcfc1r1	1728.45	0.676299	-0.564266	0.135518	6.44679e-06	0.000111691	2203.94	1968.3	1475.71	1265.85
Atp6v1b2	4452.49	1.38248	0.46726	0.110118	6.47825e-06	0.000111973	3523.02	3867.69	5384.93	5034.32
Tnfrsf22	607.949	0.611003	-0.710749	0.174749	6.47122e-06	0.000111973	711.626	821.985	476.236	421.949
Akt3	1224.59	0.680405	-0.555534	0.133376	6.54752e-06	0.000113037	1430.28	1517.28	989.72	961.105
Ncbp2	1410.76	0.691053	-0.533132	0.127497	6.64286e-06	0.000114549	1659.68	1711.88	1120.97	1150.51
Pqbp1	934.446	1.52407	0.607925	0.147266	6.75225e-06	0.000116298	691.729	760.159	1180.39	1105.51
Kif5b	3680.27	0.717094	-0.479765	0.113748	6.80361e-06	0.000117046	4589.29	4059.25	2990.44	3082.1
Bcam	956.158	0.653416	-0.613926	0.148988	6.81254e-06	0.000117063	1116.6	1226.39	783.085	698.559
Hnrnpa0	7421.23	1.44913	0.535188	0.128049	6.84071e-06	0.00011741	5195.58	6743.11	8966.9	8779.34
Tspan8	17803.3	1.38696	0.47193	0.112664	6.93753e-06	0.000118933	15443.9	13997.1	19190.5	22581.8
Aqp8	127.169	2.52921	1.33868	0.34664	7.02379e-06	0.000120271	69.0559	64.8669	218.164	156.59
Wdr44	278.396	1.87066	0.903549	0.227782	7.05399e-06	0.000120648	177.907	194.601	370.701	370.377
Spsb4	26.4598	9.78876	3.29113	0.851384	7.09954e-06	0.000121286	4.68175	3.04063	54.9844	43.1325
2810429I04Rik	15.1914	0.00692135	-7.17473	2.76379	7.12002e-06	0.000121495	37.454	23.3115	0	0
Pgk1	44682.8	1.38816	0.473176	0.112093	7.13811e-06	0.000121521	39357.2	34620.7	56281	48472.5
Cdca4	1280.86	0.679591	-0.557262	0.134449	7.1313e-06	0.000121521	1463.05	1621.67	1026.97	1011.74
Nop58	5927.69	0.741621	-0.431246	0.101541	7.15913e-06	0.000121738	7033.16	6679.26	4974.32	5024
Tasor	734.936	1.64311	0.716431	0.177229	7.29054e-06	0.000123796	596.924	486.502	838.956	1017.36
Steap1	650.937	0.634332	-0.65669	0.161198	7.29698e-06	0.000123796	814.625	801.714	506.389	481.021
Cdh17	10600.5	0.718835	-0.476267	0.113573	7.43176e-06	0.000125938	11389.5	13498.4	8437.45	9076.58
Zfp395	1502.95	1.50021	0.585162	0.141446	7.55487e-06	0.000127876	1083.83	1279.09	1939.53	1709.36
Ggcx	943.834	1.57815	0.658237	0.16172	7.64401e-06	0.00012921	637.889	792.592	1100.58	1244.28
Dhcr7	935.331	0.665159	-0.588229	0.143224	7.65123e-06	0.00012921	1129.47	1145.31	752.045	714.5
Rfc4	1569.39	0.698594	-0.517473	0.124449	7.75211e-06	0.000130763	1884.41	1848.71	1299.23	1245.22
Cinp	894.719	0.663525	-0.591778	0.144368	7.82223e-06	0.000131795	1099.04	1079.43	695.287	705.123
Slc22a14	32.3724	0.1504	-2.73313	0.726266	7.88854e-06	0.00013276	69.0559	46.6231	4.43423	9.37664
Bst2	790.666	0.652175	-0.616669	0.151188	7.97414e-06	0.000134048	943.373	996.315	617.245	605.731
Ceacam1	203.377	2.11436	1.08022	0.278182	7.99131e-06	0.000134183	102.999	143.923	274.035	292.551
Grina	4163.68	1.39361	0.478831	0.114632	8.32076e-06	0.000139555	3187.1	3685.25	4946.82	4835.53
Fam117a	195.76	2.08895	1.06278	0.274684	8.44145e-06	0.000141409	131.089	109.463	252.751	289.738
Nt5c3b	1634.21	0.648743	-0.624281	0.150889	8.45053e-06	0.000141409	2269.48	1737.22	1319.63	1210.52
Ank1	98.8856	2.67409	1.41905	0.373429	8.6051e-06	0.000143832	51.4993	47.6366	145.443	150.964
Lrrc57	321.69	0.558206	-0.841131	0.213882	8.69557e-06	0.00014518	441.255	401.364	218.164	225.977
Gk	1149.7	1.50903	0.593626	0.145719	8.77941e-06	0.000146413	980.827	817.931	1387.91	1412.12
Bdh1	104.592	0.385215	-1.37626	0.363774	9.15382e-06	0.000152484	150.987	160.14	59.4187	47.8208
Gm35019	1176.09	1.55258	0.634668	0.157282	9.25129e-06	0.000153933	945.714	857.459	1275.28	1625.91
Chd3	3670.53	1.39353	0.478749	0.115344	9.31161e-06	0.000154762	2816.07	3241.32	4334.9	4289.81
Hacd1	844.144	0.649696	-0.622164	0.154153	9.36553e-06	0.000155483	1100.21	975.03	624.339	676.993
P4ha3	266.542	0.537146	-0.896613	0.230322	9.38948e-06	0.000155704	365.177	343.592	177.369	180.031
Wwc1	4288.82	1.39659	0.481905	0.117111	9.62998e-06	0.000159513	3306.49	3752.14	5320.19	4776.46
Cd99l2	1190.13	1.51177	0.59624	0.147328	9.81771e-06	0.000162439	835.693	1021.65	1420.73	1482.45
Rspo3	14.4281	0.0074343	-7.07159	2.76338	9.86137e-06	0.000162979	22.2383	35.4741	0	0
Btg3	301.249	0.554585	-0.85052	0.218218	9.93632e-06	0.000164033	406.142	385.147	209.296	204.411
Arhgap40	215.843	1.9835	0.988047	0.25655	9.95218e-06	0.000164111	145.134	130.747	285.564	301.928
Calu	13527	0.737717	-0.438861	0.105356	1.00201e-05	0.000165046	15000.3	16374.8	10765.4	11967.4
Fundc1	1295.29	1.53148	0.614925	0.15278	1.0057e-05	0.000165467	1128.3	876.716	1533.36	1642.79
Prkd3	913.748	0.665986	-0.586437	0.145537	1.00894e-05	0.000165816	1067.44	1155.44	714.798	717.313
2210016F16Rik	96.5539	2.81168	1.49143	0.398707	1.02473e-05	0.000168223	57.3515	35.4741	148.99	144.4
Emd	1792.7	1.41898	0.504851	0.122957	1.03152e-05	0.000169148	1403.36	1519.3	2150.6	2097.55
Clic6	97.75	2.66898	1.41629	0.377409	1.03793e-05	0.00017001	50.3288	47.6366	155.198	137.837
Plek2	985.425	1.49439	0.579552	0.143668	1.07135e-05	0.000175091	751.421	798.673	1152.01	1239.59
Lss	3084.42	0.733056	-0.448004	0.108182	1.07252e-05	0.000175091	3602.61	3573.76	2578.06	2583.26
Mfsd2a	292.373	0.541545	-0.884847	0.22903	1.07219e-05	0.000175091	423.699	351.7	191.559	202.535
Il10rb	835.502	1.56132	0.642767	0.160993	1.07462e-05	0.000175239	702.263	573.666	1007.46	1058.62
Sema6b	781.288	1.55265	0.634734	0.158697	1.09999e-05	0.000179177	551.276	645.628	974.643	953.604
Slc38a7	851.805	1.51567	0.599958	0.14938	1.10249e-05	0.000179212	644.911	682.116	1006.57	1073.62
Abcb7	1157.66	1.47363	0.55937	0.13823	1.10264e-05	0.000179212	888.363	950.705	1339.14	1452.44
Zfp704	68.1248	3.40752	1.76872	0.47723	1.10812e-05	0.000179904	23.4088	31.4199	128.593	89.078
Nab1	2114.22	1.4052	0.490777	0.119806	1.1294e-05	0.000183157	1667.87	1801.07	2429.07	2558.88
Slc12a2	9732.24	0.734893	-0.444394	0.107608	1.14484e-05	0.000185456	11272.5	11344.6	7571.89	8739.96
2810402E24Rik	332.659	1.93239	0.950389	0.248639	1.15703e-05	0.000187226	266.86	167.235	455.839	440.702
Col16a1	34.9886	0.185909	-2.42733	0.662515	1.16718e-05	0.000188588	69.0559	52.7043	9.7553	8.43897
Krt79	22.1289	0.0900972	-3.47237	0.930468	1.16802e-05	0.000188588	44.4767	38.5147	1.77369	3.75065
Orc2	2330.61	0.716875	-0.480206	0.11763	1.17744e-05	0.000189901	2779.79	2702.11	1834.88	2005.66
Tspan2	442.927	0.598705	-0.740083	0.189461	1.18918e-05	0.000191584	551.276	576.707	302.414	341.31
Gm14586	316.489	0.496646	-1.00971	0.266442	1.20249e-05	0.000193516	522.015	345.619	232.354	165.966
Cxcl17	89.2518	2.8232	1.49733	0.404279	1.22546e-05	0.000196997	35.1131	49.6637	141.895	130.335
Twist1	288.321	1.85959	0.894981	0.233613	1.23768e-05	0.000198608	174.395	211.831	359.172	407.884
Rap2a	323.467	0.567993	-0.816054	0.211616	1.23818e-05	0.000198608	414.335	427.716	231.467	220.351
Zfp981	91.2888	3.49318	1.80454	0.494465	1.24661e-05	0.000199301	56.181	16.2167	143.669	149.088
Hgfac	1850.9	1.52285	0.606778	0.152296	1.24395e-05	0.000199301	1635.1	1240.58	2422.86	2105.05
Rpl10a-ps1	287.004	0.513021	-0.962911	0.253538	1.24691e-05	0.000199301	385.074	392.242	223.485	147.213
A830082K12Rik	26.7519	0.12125	-3.04394	0.829085	1.24792e-05	0.000199301	43.3062	54.7314	7.09476	1.87533
Qsox1	232.368	0.505994	-0.982807	0.259332	1.24988e-05	0.000199399	294.95	337.51	167.614	129.398
Lin28b	26.1888	0.0141421	-6.14386	1.415	1.25897e-05	0.00020063	56.181	47.6366	0	0.937664
Plpbp	1550.04	1.42555	0.511516	0.126347	1.28203e-05	0.000204085	1253.54	1264.9	1775.46	1906.27
Rnd1	448.436	0.607021	-0.720183	0.184783	1.29392e-05	0.000205755	555.958	579.748	330.793	327.245
Perp	2326.98	1.41955	0.50543	0.124799	1.30377e-05	0.000207096	1817.69	1973.37	2575.4	2941.45
Rfc5	1965.35	0.718605	-0.47673	0.117379	1.31704e-05	0.000208978	2305.76	2311.9	1630.02	1613.72
Ifi204	388.945	1.69328	0.759817	0.196045	1.31877e-05	0.000209027	279.735	279.738	498.407	497.899
Zfpm1	377.733	0.532546	-0.909021	0.239047	1.32105e-05	0.000209163	397.949	610.154	241.222	261.608
Col6a2	140.683	0.421706	-1.24569	0.336278	1.33087e-05	0.000210492	244.622	163.181	78.0424	76.8884
Mrpl24	1196.77	1.44875	0.534807	0.132963	1.33668e-05	0.000211184	974.975	948.678	1443.78	1419.62
Stc2	13.6107	0.00808579	-6.95039	2.75757	1.34273e-05	0.000211911	28.0905	26.3522	0	0
Hspa9	14028.2	0.735252	-0.443689	0.108408	1.35012e-05	0.00021285	15026.1	17570.8	11940.5	11575.5
Gstp3	33.219	0.175989	-2.50644	0.691536	1.36834e-05	0.000215492	60.8628	55.745	10.6421	5.62598
Capn10	729.822	0.630855	-0.66462	0.169764	1.37383e-05	0.000216124	996.043	822.998	582.658	517.59
Sox9	656.067	0.600911	-0.734778	0.190504	1.40002e-05	0.000220009	697.581	971.989	471.802	482.897
Mllt6	2392.3	1.41672	0.502557	0.124723	1.40169e-05	0.000220036	1804.82	2096.01	2925.7	2742.67
Ankdd1b	15.1723	113.323	6.8243	2.68456	1.40688e-05	0.000220616	0	0	37.2475	23.4416
Tab3	448.168	1.66312	0.733895	0.189551	1.41011e-05	0.000220888	345.279	308.118	588.865	550.408
Praf2	579.415	1.68175	0.749964	0.194181	1.42708e-05	0.000223245	349.961	486.502	725.44	755.757
Aspa	127.455	0.398323	-1.32799	0.361909	1.4282e-05	0.000223245	218.872	157.099	53.2107	80.6391
Acsl3	2993.11	0.689357	-0.536676	0.134316	1.43006e-05	0.000223298	3284.25	3883.9	2181.64	2622.64
Nono	10218.8	1.33539	0.417263	0.101705	1.44374e-05	0.000224958	8279.68	9055.01	12022.1	11518.3
mt-Tc	334.875	0.510458	-0.970137	0.258388	1.44268e-05	0.000224958	559.469	349.673	196.88	233.478
Osmr	99.8076	2.73663	1.4524	0.396251	1.44684e-05	0.000225202	36.2836	60.8127	143.669	158.465
Zyx	2533.77	1.44252	0.528595	0.132122	1.4625e-05	0.000227399	1972.19	2110.2	3337.2	2715.47
Slc25a5	9934.56	1.32041	0.400987	0.097785	1.50165e-05	0.000233239	8420.13	8550.26	11676.2	11091.6
Bicc1	6295.47	0.716179	-0.481607	0.119491	1.51726e-05	0.000235416	6975.81	7837.74	5619.05	4749.27
Rnf43	436.648	0.600564	-0.73561	0.191178	1.52734e-05	0.000236729	538.402	572.653	297.98	337.559
Fmr1	2496.24	1.50605	0.590772	0.149608	1.53308e-05	0.00023737	2267.14	1639.92	2978.91	3098.98
Exoc8	823.038	1.52009	0.60416	0.153698	1.55675e-05	0.000240781	616.821	661.845	1058.01	955.479
Cog4	1706.75	1.4061	0.491698	0.122412	1.56919e-05	0.00024245	1388.14	1409.84	2063.69	1965.34
Gpr180	383.385	0.587617	-0.767051	0.200656	1.5774e-05	0.000243463	472.857	511.84	289.112	259.733
1700052K11Rik	290.002	1.82381	0.866957	0.22955	1.60311e-05	0.000247172	177.907	215.885	390.212	376.003
Pofut1	1823.77	0.707429	-0.499342	0.124967	1.64438e-05	0.000253269	2256.6	2060.54	1539.56	1438.38
Slc20a2	2604.09	1.36822	0.452298	0.111974	1.65182e-05	0.000254148	2187.55	2159.86	3086.22	2982.71
Mpv17l2	650.409	1.59369	0.672367	0.173921	1.67248e-05	0.000257058	517.334	460.149	881.525	742.63
Hdac1	3254.91	0.737236	-0.439802	0.108776	1.67806e-05	0.000257646	3871.81	3684.24	2703.11	2760.48
Msrb2	212.626	0.514293	-0.959337	0.258011	1.6963e-05	0.000260176	303.144	272.644	131.253	143.463
Arf5	6654.36	1.40233	0.487831	0.12232	1.71724e-05	0.000263114	6047.65	4875.15	8099.56	7595.07
Gm9843	503.073	0.535433	-0.901221	0.241177	1.71968e-05	0.000263213	772.489	569.612	413.27	256.92
Zkscan3	2306.33	1.3965	0.481812	0.120426	1.73721e-05	0.000265619	1993.26	1805.12	2622.4	2804.55
Trub2	1493.53	0.67147	-0.574606	0.146628	1.75161e-05	0.000267544	2008.47	1613.56	1236.26	1115.82
Ndufa13	3809.85	1.37408	0.45847	0.114138	1.78244e-05	0.00027197	3367.35	2975.77	4569.92	4326.38
Acin1	3469.56	1.37437	0.458775	0.114316	1.79659e-05	0.000273482	2715.42	3057.86	4143.34	3961.63
Dhcr24	5294.56	0.724906	-0.464133	0.115858	1.79793e-05	0.000273482	5674.28	6714.73	4475.02	4314.19
Vangl2	13.3392	0.00846134	-6.8849	2.77041	1.79524e-05	0.000273482	35.1131	18.2438	0	0
Polr3gl	412.904	1.70604	0.77065	0.203658	1.84006e-05	0.000279602	328.893	261.495	543.636	517.59
Gm47604	123.408	2.37354	1.24704	0.343452	1.84716e-05	0.000280391	57.3515	78.043	179.143	179.094
Slc10a3	432.888	1.6562	0.727874	0.191179	1.85621e-05	0.000281475	314.848	317.24	579.997	519.466
Ptgfrn	4936.35	1.34533	0.42796	0.10626	1.89559e-05	0.00028715	3981.83	4348.11	5639.45	5776.01
Fam8a1	1352.6	1.43858	0.524642	0.133039	1.90136e-05	0.000287727	1116.6	1066.25	1536.02	1691.54
Pdxk	1168.06	0.689499	-0.53638	0.136598	1.92709e-05	0.000291322	1360.05	1438.22	972.87	901.095
Cyth4	23.3938	0.100512	-3.31456	0.92878	1.93123e-05	0.000291648	60.8628	26.3522	3.54738	2.81299
Sem1	6162.92	1.36136	0.445046	0.111085	1.95368e-05	0.000294735	5360.61	4960.29	6716.97	7613.83
4930550L24Rik	12.8897	0.00881379	-6.82602	2.76147	1.9715e-05	0.000297118	29.261	22.298	0	0
Gprasp1	483.02	1.61114	0.688079	0.18032	1.99968e-05	0.000301058	354.643	364.876	619.018	593.541
Cep131	479.276	1.62201	0.697782	0.183318	2.00317e-05	0.000301177	337.086	372.984	617.245	589.79
Usp46	1574.32	0.712506	-0.489027	0.123622	2.00457e-05	0.000301177	1845.78	1868.98	1272.62	1309.92
E330009J07Rik	2943.77	1.36092	0.44458	0.110955	2.01286e-05	0.000302113	2395.89	2535.89	3464.91	3378.4
Rac2	18.7476	0.0557804	-4.1641	1.12072	2.02091e-05	0.000303014	39.7949	32.4334	0.886846	1.87533
Gsto1	6447.18	0.754131	-0.407114	0.101164	2.0248e-05	0.000303287	7569.22	7240.76	5603.09	5375.62
Ttc38	310.532	1.76927	0.823157	0.220372	2.02986e-05	0.000303736	208.338	222.98	430.12	380.691
Ncbp1	3518.61	0.744768	-0.425138	0.105978	2.03425e-05	0.000304083	4076.64	4053.17	2980.69	2963.95
Brcc3	785.042	1.51402	0.598382	0.154757	2.04069e-05	0.000304737	646.082	576.707	951.585	965.793
Ccl8	60.2925	3.33436	1.73741	0.490794	2.04806e-05	0.000305526	26.9201	22.298	102.874	89.078
Zfp280d	312.362	0.560886	-0.834221	0.224251	2.05647e-05	0.00030647	450.619	367.917	219.938	210.974
Dhx15	5686.38	0.755948	-0.403641	0.100529	2.0808e-05	0.000309782	6502.95	6546.49	4783.65	4912.42
Pole2	563.325	0.638587	-0.647045	0.169251	2.08539e-05	0.000310152	684.706	712.522	425.686	430.388
Ltn1	1404.21	1.4187	0.504571	0.12819	2.09942e-05	0.000311923	1113.09	1173.68	1677.91	1652.16
Pkn1	1311.27	1.43126	0.517287	0.131756	2.10264e-05	0.000312086	1022.96	1099.7	1587.45	1534.96
Bcorl1	547.977	1.68006	0.748513	0.198845	2.1159e-05	0.000313738	349.961	440.892	782.198	618.858
Mr1	58.2636	0.293909	-1.76656	0.503699	2.21517e-05	0.000328126	76.0785	110.476	23.058	23.4416
Ssr4	5176.08	1.38333	0.468141	0.118356	2.21855e-05	0.000328296	4692.29	3883.9	6080.21	6047.93
Nr2f6	1927.06	1.4267	0.512685	0.130944	2.22156e-05	0.000328411	1425.59	1699.71	2329.74	2253.21
Tenm1	26.032	57.5761	5.8474	1.40867	2.23963e-05	0.000330688	1.17044	0	52.3239	50.6338
Akirin1	1161.14	0.690863	-0.533529	0.137098	2.24146e-05	0.000330688	1403.36	1376.39	886.846	977.983
Crim1	1302.07	0.700856	-0.51281	0.131368	2.26839e-05	0.000334326	1507.52	1589.24	1081.95	1029.55
Pex19	1893.52	0.713274	-0.487471	0.124143	2.28328e-05	0.000335619	2337.37	2129.46	1606.08	1501.2
Hmga2	4102.65	0.69142	-0.532366	0.137024	2.28401e-05	0.000335619	5478.82	4342.03	3569.55	3020.21
Ccdc136	95.0739	0.39454	-1.34176	0.378344	2.28143e-05	0.000335619	135.771	145.95	47.0028	51.5715
Mindy1	4930.98	1.34242	0.424839	0.106585	2.28737e-05	0.000335778	4028.65	4302.5	5887.77	5505.02
Phkb	933.351	1.46943	0.555252	0.143431	2.30385e-05	0.00033786	722.16	761.172	1118.31	1131.76
Etl4	1571.85	1.44391	0.529979	0.136246	2.32431e-05	0.000340521	1182.14	1345.99	1763.94	1995.35
3830403N18Rik	466.349	1.65655	0.728181	0.194404	2.34569e-05	0.000343312	374.54	306.091	564.034	620.733
Irf9	384.089	1.72749	0.788675	0.212431	2.35036e-05	0.000343481	296.121	247.305	540.976	451.954
Tef	892.852	0.668771	-0.580415	0.151065	2.35152e-05	0.000343481	1008.92	1160.51	700.608	701.372
Cep250	809.159	1.49477	0.579919	0.150844	2.3674e-05	0.000345116	658.957	612.181	979.078	986.422
Casc4	26.4733	0.150161	-2.73542	0.784718	2.36708e-05	0.000345116	43.3062	51.6908	6.20792	4.68832
Capn7	918.995	1.47102	0.556821	0.144183	2.38132e-05	0.0003468	709.286	750.023	1112.1	1104.57
Gstm1	8174.25	0.692669	-0.529761	0.135929	2.39333e-05	0.000348205	8313.62	11218.9	6813.63	6350.8
Klf8	21.2056	24.6027	4.62074	1.21558	2.42097e-05	0.000351878	2.34088	0	49.6634	32.8182
Ttc26	493.308	0.62415	-0.680034	0.18067	2.42357e-05	0.000351909	649.593	586.842	363.607	373.19
Itga2	3538.49	1.35173	0.434804	0.109669	2.4549e-05	0.000356106	3074.74	2878.47	4206.31	3994.45
Fanci	476.583	0.623694	-0.68109	0.181272	2.48302e-05	0.00035983	587.56	607.113	344.096	367.564
Ccdc122	298.57	1.84069	0.88025	0.241398	2.54867e-05	0.000367894	235.258	167.235	385.778	406.008
Atf7ip	1217.89	1.45293	0.538968	0.139579	2.54829e-05	0.000367894	908.26	1041.92	1496.11	1425.25
Resf1	1408.93	1.42229	0.50822	0.130788	2.54347e-05	0.000367894	1110.75	1178.75	1608.74	1737.49
2610507B11Rik	10038.3	1.35749	0.440939	0.11223	2.54681e-05	0.000367894	7672.22	9148.26	11783.5	11549.2
Glmp	2178.34	1.41706	0.502901	0.129337	2.56984e-05	0.000370586	1609.35	1938.91	2594.02	2571.07
Cdr2	656.692	0.612874	-0.706337	0.189715	2.59471e-05	0.000373806	695.24	963.881	491.312	476.333
Naxd	1525.21	1.44418	0.530247	0.137353	2.60497e-05	0.00037455	1323.77	1130.1	1907.6	1739.37
Alg14	552.043	0.626588	-0.674412	0.179885	2.60317e-05	0.00037455	677.684	703.4	375.136	451.954
Cyth2	2643.48	0.723724	-0.466489	0.119218	2.60866e-05	0.000374714	3262.01	2932.19	2276.53	2103.18
Syn1	24.7394	9.04844	3.17767	0.901666	2.62999e-05	0.000377411	1.17044	6.08127	52.3239	39.3819
Zfp746	1703.5	1.42767	0.513667	0.132781	2.63484e-05	0.000377737	1449	1312.54	2162.13	1890.33
Lzts2	2616.3	0.702434	-0.509566	0.131699	2.64656e-05	0.000378679	3334.58	2883.53	2300.48	1946.59
Apip	1112.41	0.683071	-0.549892	0.143352	2.64602e-05	0.000378679	1426.76	1251.73	917.885	853.274
Vps41	2157.69	1.3689	0.453019	0.115504	2.66769e-05	0.000381333	1791.94	1806.14	2548.79	2483.87
Slc35b4	1504.14	1.41775	0.503605	0.129942	2.67657e-05	0.00038223	1166.93	1282.13	1838.43	1729.05
Cldn12	1771.96	0.719461	-0.475012	0.121955	2.70611e-05	0.000386074	2093.91	2069.66	1412.75	1511.51
Sult1c2	4935.99	1.3745	0.458904	0.117287	2.73654e-05	0.000389658	3737.21	4470.75	5728.14	5807.89
Gtf2b	2400.61	0.730073	-0.453886	0.115938	2.73621e-05	0.000389658	2782.13	2818.67	1920.02	2081.61
Habp4	1274.39	1.43278	0.518815	0.134687	2.80985e-05	0.00039971	1085	976.044	1498.77	1537.77
Lage3	929.54	1.47709	0.56276	0.147603	2.8406e-05	0.000403695	772.489	699.346	1085.5	1160.83
Cxcl2	255.429	0.545488	-0.874382	0.241886	2.86109e-05	0.000406214	356.984	320.28	157.859	186.595
Bax	2329.35	0.705901	-0.502463	0.130336	2.87347e-05	0.000407578	3032.61	2491.29	1870.36	1923.15
Mob1a	6017.07	1.31921	0.399671	0.101086	2.88648e-05	0.000409029	5093.75	5186.31	7054.86	6733.36
Pld2	942.767	1.46789	0.553741	0.145362	2.96832e-05	0.000420222	738.547	760.159	1187.49	1084.88
Ttyh3	943.483	0.677234	-0.562274	0.148087	2.99212e-05	0.000423184	1104.89	1175.71	791.953	701.372
Plcl2	1739.51	0.722808	-0.468315	0.120818	3.01423e-05	0.000425901	2020.18	2058.51	1459.75	1419.62
Ptpn13	2198.36	1.46266	0.548598	0.144243	3.01834e-05	0.000426073	1502.84	1997.7	2638.37	2654.53
Ubl3	2805.06	1.35058	0.433583	0.110926	3.04757e-05	0.000429786	2302.25	2416.29	3257.38	3244.32
Capza1	2891	0.739768	-0.434855	0.111411	3.05062e-05	0.000429804	3254.99	3449.09	2470.75	2389.17
Igsf8	1652.21	0.718458	-0.477025	0.123491	3.07815e-05	0.000433268	1993.26	1892.29	1385.25	1338.05
Tent5b	392.049	1.77133	0.824833	0.227511	3.0906e-05	0.000434604	218.872	323.321	536.542	489.46
Lgals4	20760.4	1.29849	0.376837	0.0950422	3.11882e-05	0.000438154	17651.4	18189.1	23003.9	24197.3
Tmem260	412.505	1.65375	0.725743	0.197526	3.12524e-05	0.000438636	316.018	285.82	493.086	555.097
Tmem167b	1842.49	0.716684	-0.48059	0.124699	3.15345e-05	0.000442175	2044.76	2292.64	1519.17	1513.39
Meis1	179.8	0.505297	-0.984796	0.277723	3.1566e-05	0.000442195	237.599	253.386	108.195	120.021
Usp27x	150.461	2.14913	1.10375	0.314297	3.16515e-05	0.00044297	102.999	76.0159	213.73	209.099
Rasl11b	131.441	0.444378	-1.17014	0.335513	3.17543e-05	0.000443986	201.315	174.33	63.8529	86.265
Daglb	301.803	0.551833	-0.857696	0.238673	3.20295e-05	0.00044741	403.801	393.255	238.561	171.592
Trim68	504.934	1.579	0.65901	0.177637	3.25191e-05	0.000453817	393.267	368.93	635.868	621.671
Cul1	5336.63	1.33903	0.421184	0.107999	3.32298e-05	0.000463296	4252.2	4774.81	6144.07	6175.45
S100a10	18746.9	1.32544	0.406477	0.103837	3.33151e-05	0.000464046	16643.6	15285.3	20399.2	22659.6
Smg6	1032.72	1.49446	0.579621	0.154167	3.33526e-05	0.000464128	728.013	891.919	1310.76	1200.21
Hsd3b2	22.3208	9.28401	3.21475	0.928197	3.40102e-05	0.000472832	2.34088	4.05418	42.5686	40.3195
Rnf125	31.2118	0.170912	-2.54868	0.757356	3.40645e-05	0.00047314	67.8854	42.5689	10.6421	3.75065
Rps27rt	611.471	0.567833	-0.81646	0.227202	3.41945e-05	0.000474497	987.85	609.14	469.141	379.754
Apc2	36.2497	0.211065	-2.24424	0.666633	3.43441e-05	0.000476124	57.3515	66.894	14.1895	6.56364
Rhoc	3758.91	0.739948	-0.434503	0.112143	3.44598e-05	0.000477278	4368.08	4349.12	3346.07	2972.39
Gpr141	24.9189	0.148901	-2.74758	0.813669	3.47166e-05	0.000480382	40.9653	48.6502	4.43423	5.62598
Arl4c	1663.81	0.716581	-0.480799	0.125601	3.49493e-05	0.000483148	2003.79	1914.59	1426.93	1309.92
Myof	7709.04	1.38138	0.466109	0.121655	3.55686e-05	0.000491248	5687.16	7077.58	8757.6	9313.81
Adam9	2488.3	1.3779	0.462473	0.120287	3.56379e-05	0.000491743	1956.97	2172.03	2791.79	3032.4
C9orf72	675.518	0.638909	-0.646317	0.175467	3.61576e-05	0.000498447	819.307	857.459	450.518	574.788
Rnf4	4226.02	0.743685	-0.427236	0.110527	3.67558e-05	0.000506218	4866.68	4910.62	3770.87	3355.9
Sfmbt2	18.1368	0.0407499	-4.61706	1.26319	3.68352e-05	0.000506838	43.3062	27.3657	0	1.87533
Stac	277.4	0.55425	-0.851392	0.239517	3.72174e-05	0.000511618	408.483	323.321	197.767	180.031
Ccne1	427.795	0.603227	-0.729227	0.201319	3.74796e-05	0.000514741	493.925	594.951	332.567	289.738
Tbc1d12	187.259	1.99153	0.993879	0.283949	3.77511e-05	0.000517986	112.362	123.652	227.032	285.987
Gstm4	44.4261	0.267082	-1.90465	0.570168	3.86368e-05	0.000529644	73.7376	71.9617	14.1895	17.8156
Hpse	830.094	1.56498	0.64614	0.176055	3.8826e-05	0.000531248	543.083	715.563	952.472	1109.26
Zfp280c	758.696	1.50621	0.59092	0.159238	3.8816e-05	0.000531248	602.776	580.761	862.014	989.235
Zmynd15	730.694	1.53098	0.61446	0.166512	3.89834e-05	0.000532906	621.503	505.759	901.922	893.593
Shpk	160.045	2.05878	1.04179	0.299787	3.90864e-05	0.000533818	97.1464	99.3274	242.109	201.598
Casp2	2379.15	1.38768	0.472674	0.124058	3.92486e-05	0.000535535	2050.61	1879.11	2973.59	2613.27
Trappc4	1268.76	0.708574	-0.49701	0.131592	4.00844e-05	0.000546433	1468.9	1535.52	1058.89	1011.74
Uba2	5296.16	0.748821	-0.417307	0.108268	4.01964e-05	0.000547452	6436.24	5777.21	4588.54	4382.64
Phf2	1211.32	1.43732	0.523382	0.1393	4.04187e-05	0.000549972	948.055	1004.42	1536.02	1356.8
Bptf	2182.16	1.36201	0.445736	0.11646	4.04689e-05	0.000550146	1775.55	1873.03	2572.74	2507.31
Heph	11.5836	0.0104751	-6.5769	2.77224	4.05559e-05	0.000550818	28.0905	18.2438	0	0
Ndufv1	4407.39	0.740692	-0.433055	0.112378	4.08279e-05	0.000554001	5384.02	4827.51	3858.67	3559.37
Ppfia3	180.167	0.512984	-0.963015	0.276514	4.08793e-05	0.000554188	243.451	246.291	109.969	120.959
Endod1	749.89	1.49377	0.578962	0.156277	4.1384e-05	0.000560323	562.981	613.195	939.169	884.217
Mvp	2824.05	1.3861	0.471029	0.124019	4.1408e-05	0.000560323	2239.05	2427.44	3575.76	3053.97
Arl5b	675.98	0.649346	-0.62294	0.170037	4.16746e-05	0.000563412	825.159	841.242	466.481	571.037
Gtf2a2	1544.68	0.711756	-0.490546	0.130115	4.17561e-05	0.000563995	1803.65	1846.68	1186.6	1341.8
Rab10os	138.972	2.16939	1.11729	0.325905	4.21988e-05	0.000569452	93.6351	69.9346	189.785	202.535
Lrmp	1414.77	1.4416	0.527672	0.141032	4.22402e-05	0.000569487	1233.64	1042.94	1777.24	1605.28
Diaph2	537.623	1.62727	0.702457	0.194685	4.25461e-05	0.000573087	348.791	442.919	619.905	738.879
Ran	12962.2	0.76951	-0.377988	0.0976995	4.27653e-05	0.000575512	14610.6	14896.1	11561.8	10780.3
Epn3	805.383	1.47279	0.558549	0.150498	4.2928e-05	0.000577173	635.548	640.56	1002.14	943.29
Arhgef16	1133.27	1.42414	0.510091	0.136016	4.34593e-05	0.00058325	911.771	926.38	1389.69	1305.23
Anp32a	3513.44	0.752738	-0.40978	0.106737	4.34349e-05	0.00058325	3983	4099.79	3028.58	2942.39
Zcchc14	2057.49	1.44507	0.531139	0.142074	4.36219e-05	0.0005849	1434.96	1868.98	2478.73	2447.3
Chsy1	729.742	0.644899	-0.632854	0.173791	4.4228e-05	0.000592485	788.875	1015.57	546.297	568.224
Gm29100	31.8759	5.24765	2.39167	0.722798	4.46155e-05	0.000597133	10.5339	6.08127	61.1923	49.6962
Dazap2	11465.5	1.29168	0.369246	0.0952026	4.47982e-05	0.000599033	9975.65	9873.95	13108.5	12904.1
Dgcr8	1374.43	0.71177	-0.490517	0.130723	4.50486e-05	0.000601835	1658.51	1590.25	1170.64	1078.31
Pcyt1b	102.545	2.4012	1.26375	0.374398	4.51323e-05	0.000602406	62.0332	48.6502	156.972	142.525
Ereg	264.656	0.541326	-0.885431	0.254026	4.54157e-05	0.000605638	311.337	393.255	154.311	199.722
Kdm7a	680.984	1.50151	0.586413	0.159627	4.57045e-05	0.000608937	511.482	552.382	827.427	832.645
Plekhh1	646.006	1.51904	0.603159	0.164896	4.58191e-05	0.000609913	522.015	479.407	821.219	761.383
Plcb3	2943.75	1.34445	0.427013	0.112021	4.61304e-05	0.000613502	2381.84	2581.5	3411.69	3399.97
Sgsh	317.421	1.70975	0.773789	0.2185	4.62214e-05	0.000614157	241.11	209.804	422.138	396.632
Rpl34	42847.9	0.749865	-0.415296	0.108819	4.6775e-05	0.000620951	53505.4	45255.8	35197.1	37433.4
Tec	72.1578	0.337668	-1.56632	0.472727	4.68205e-05	0.000620994	84.2716	139.869	36.3607	28.1299
Hspa14	1995.83	0.713359	-0.487299	0.130104	4.6908e-05	0.000621034	2556.24	2156.82	1674.36	1595.9
Cand2	17.7648	0.0615734	-4.02155	1.16734	4.68935e-05	0.000621034	32.7723	35.4741	0	2.81299
Strada	617.601	1.53545	0.618659	0.1702	4.78055e-05	0.000631779	492.754	457.109	807.916	712.624
Mcm4	4793.67	0.751588	-0.411986	0.108074	4.77858e-05	0.000631779	5341.88	5696.12	4244.44	3892.24
4930402H24Rik	1405	0.709276	-0.495581	0.132739	4.79077e-05	0.000632563	1583.6	1742.28	1102.35	1191.77
Med27	384.73	0.604107	-0.727123	0.205222	4.99434e-05	0.00065885	529.038	451.027	294.433	264.421
Pex6	2233.77	1.36855	0.452645	0.120109	4.99995e-05	0.000658998	1927.71	1794.99	2718.18	2494.18
Phf19	546.465	0.624254	-0.679795	0.190267	5.03696e-05	0.000663282	647.252	724.685	457.612	356.312
Gm43197	78.2845	2.65043	1.40623	0.423394	5.04196e-05	0.000663346	39.7949	37.5012	122.385	113.457
Txndc15	1663.43	1.41249	0.49824	0.134361	5.07577e-05	0.000667198	1475.92	1235.51	1941.3	2000.97
Tmtc4	611.318	0.660141	-0.599154	0.165057	5.086e-05	0.000667946	770.148	726.712	483.331	465.081
Ces2g	122.461	2.2736	1.18498	0.352524	5.10222e-05	0.000669241	59.6924	78.043	155.198	196.909
Dap	7865.65	1.37716	0.461695	0.123622	5.10496e-05	0.000669241	5889.65	7146.5	9859.95	8566.49
Soat1	2221.57	1.41637	0.502202	0.135193	5.13632e-05	0.000672752	1618.72	1995.67	2514.21	2757.67
Crb3	959.88	1.45874	0.544718	0.148203	5.14815e-05	0.000673703	813.455	717.59	1195.47	1113.01
Pex5	2405.27	1.35247	0.435601	0.115248	5.15309e-05	0.000673749	2090.4	1950.06	2755.43	2825.18
Car5b	1154.52	1.43375	0.519792	0.140661	5.20401e-05	0.000679802	922.305	940.57	1286.81	1468.38
Gpt	654.78	1.50177	0.586666	0.161353	5.2499e-05	0.000685189	496.266	526.03	785.745	811.079
Klf10	1148.59	1.41235	0.498093	0.134186	5.25647e-05	0.00068523	919.964	952.732	1364.86	1356.8
Nr0b2	17.0767	0.0431867	-4.53327	1.27072	5.25953e-05	0.00068523	35.1131	31.4199	1.77369	0
Abcb1b	884.522	0.683112	-0.549806	0.150217	5.31947e-05	0.000692425	997.213	1134.16	699.721	706.998
D630003M21Rik	796.775	0.66661	-0.585086	0.161377	5.39363e-05	0.000701458	1049.88	892.933	654.492	589.79
Rtn4ip1	384.592	0.609373	-0.714603	0.202358	5.40074e-05	0.000701762	450.619	525.016	275.809	286.925
Zgrf1	548.853	0.653494	-0.613755	0.170389	5.4213e-05	0.000703812	681.195	668.94	417.704	427.575
Dock5	797.998	1.46509	0.550987	0.150701	5.43998e-05	0.000705614	628.525	639.547	935.622	988.297
Cdh2	1260.57	0.712785	-0.488462	0.131828	5.48368e-05	0.000710655	1444.32	1533.49	1018.99	1045.49
Nol10	988.561	0.694135	-0.526711	0.143515	5.52507e-05	0.00071539	1127.13	1237.54	814.124	775.448
Kcnd1	276.326	1.73817	0.79757	0.229204	5.55477e-05	0.000718602	186.1	200.682	371.588	346.936
Chrd	116.176	2.24548	1.16702	0.349649	5.56593e-05	0.000719414	72.5672	59.7991	172.935	159.403
Tfec	10.9772	0.0113758	-6.45789	2.77765	5.57624e-05	0.000720114	17.5566	26.3522	0	0
Ly6e	19830.8	1.3197	0.400212	0.105619	5.6277e-05	0.000726121	15802.1	18041.1	23541.3	21938.5
Tmod3	3788.45	0.744	-0.426626	0.113492	5.6356e-05	0.000726504	4670.05	4097.76	3182	3204
Hcar2	21.245	0.130194	-2.94126	0.904725	5.65478e-05	0.000728338	35.1131	42.5689	3.54738	3.75065
Tpmt	317.272	0.595014	-0.749005	0.21427	5.68621e-05	0.000731745	389.756	423.662	229.693	225.977
Anxa6	3661.91	0.723671	-0.466594	0.125499	5.6931e-05	0.000731992	3872.98	4715.01	3150.08	2909.57
Wasl	3861.49	1.31964	0.400144	0.10571	5.70503e-05	0.000732885	3257.33	3332.54	4338.45	4517.66
Gm26644	19.7562	11.556	3.53057	1.056	5.72475e-05	0.000734776	3.51131	1.01354	41.6817	32.8182
Mtss1	3234.04	1.32572	0.406771	0.107682	5.74056e-05	0.000736163	2714.25	2788.26	3749.58	3684.08
Spon2	1308.63	0.654596	-0.611323	0.170519	5.75651e-05	0.000737565	1899.62	1318.62	1009.23	1007.05
Krt23	324.198	0.510183	-0.970913	0.287082	5.76371e-05	0.000737846	318.359	565.558	174.709	238.167
Isyna1	385.655	1.65101	0.723351	0.20608	5.83364e-05	0.000745645	252.815	308.118	475.349	506.338
Ncor1	4411.71	1.32739	0.408592	0.108329	5.83477e-05	0.000745645	3578.03	3921.4	5187.16	4960.24
Hmgb2	10667.6	1.28904	0.366292	0.0960631	5.85658e-05	0.000747134	9379.89	9105.69	11985.7	12199
Kpna1	1089.4	0.707747	-0.498694	0.135501	5.8522e-05	0.000747134	1285.14	1297.34	881.525	893.593
Phlpp2	733.915	1.4773	0.562967	0.15534	5.91694e-05	0.000754179	562.981	595.964	869.996	906.721
Nek4	447.889	1.58931	0.668398	0.188783	5.92691e-05	0.000754796	356.984	314.199	558.713	561.66
Ascc2	1393.5	1.40816	0.493814	0.133954	5.95565e-05	0.000757799	1061.59	1214.23	1661.95	1636.22
Prickle3	206.191	1.89624	0.923145	0.271442	5.97118e-05	0.000758463	117.044	152.032	267.827	287.863
Rab6a	2854.44	0.743002	-0.428563	0.114508	5.9671e-05	0.000758463	3443.43	3167.33	2330.63	2476.37
Acan	1276.55	0.652562	-0.615813	0.172362	5.98144e-05	0.000759111	1317.91	1824.38	892.167	1071.75
Klhdc8a	16.9802	0.0438361	-4.51174	1.28185	6.01479e-05	0.000762686	39.7949	26.3522	1.77369	0
Igsf3	1789.11	0.729373	-0.455271	0.122606	6.05077e-05	0.000766587	2014.32	2165.95	1456.2	1519.95
Avil	203.264	1.98469	0.988915	0.293369	6.06361e-05	0.000767553	98.3168	157.099	282.904	274.735
Lix1l	3153.22	1.33951	0.421704	0.112377	6.07419e-05	0.000768231	2646.36	2682.85	3814.32	3469.36
Tuft1	2706.96	1.37821	0.462798	0.124876	6.1206e-05	0.000773436	2096.25	2389.94	2974.48	3367.15
Rad9a	1505.36	0.720761	-0.472407	0.127899	6.1308e-05	0.00077406	1687.77	1849.72	1242.47	1241.47
Arrb1	2579.43	1.40785	0.493496	0.134335	6.20472e-05	0.000782721	1861	2351.42	3138.55	2966.77
Ifngr1	2923.73	1.32993	0.411351	0.109725	6.27066e-05	0.000790361	2502.4	2460.89	3302.61	3429.04
Tgoln1	4455.08	1.37897	0.463595	0.125342	6.30725e-05	0.000794292	3427.04	3953.84	4770.34	5669.11
Cnksr1	113.806	2.22201	1.15186	0.348648	6.37654e-05	0.000800961	65.5445	64.8669	156.972	167.842
Serpinb1a	446.267	1.58063	0.660501	0.187251	6.37514e-05	0.000800961	331.234	339.538	533.881	580.414
Vamp3	1888.19	0.723791	-0.466356	0.126421	6.37126e-05	0.000800961	2361.94	2067.63	1590.11	1533.08
Tspan4	4028.58	0.742844	-0.42887	0.115129	6.39165e-05	0.000801491	4955.64	4376.49	3533.19	3249
Fmo2	10.7238	0.0118156	-6.40316	2.77973	6.38756e-05	0.000801491	17.5566	25.3386	0	0
Shisa4	462.857	0.628524	-0.669961	0.190704	6.4329e-05	0.000805976	589.901	569.612	377.796	314.117
Naga	1143.37	1.41791	0.503769	0.137967	6.44614e-05	0.000806946	898.897	958.813	1303.66	1412.12
Igf2bp1	619.971	1.55595	0.637799	0.180038	6.46514e-05	0.000808638	413.165	529.07	787.519	750.131
Tpt1	107966	1.27468	0.350139	0.0928446	6.49765e-05	0.000812013	95688	92493.1	118726	124957
Wrn	543.608	1.57716	0.657332	0.186554	6.56544e-05	0.00081971	362.836	455.082	708.59	647.925
Gstm2	540.189	1.56029	0.64181	0.181921	6.57038e-05	0.00081971	369.858	449	685.532	656.364
Zfp219	1334.57	1.43734	0.523399	0.14418	6.60776e-05	0.000823674	984.339	1163.55	1693.88	1496.51
Cebpd	107.119	0.435225	-1.20017	0.36764	6.82685e-05	0.000850263	138.112	171.289	65.6266	53.4468
Snhg5	1453.24	0.725332	-0.463287	0.12624	6.94321e-05	0.000864024	1741.61	1664.24	1208.77	1198.33
Maff	1341.34	0.691336	-0.53254	0.147932	7.05066e-05	0.00087599	1427.93	1787.89	1040.27	1109.26
Ampd3	355.7	0.608275	-0.717205	0.207495	7.05127e-05	0.00087599	421.358	482.447	253.638	265.359
Appl1	762.856	1.46483	0.550736	0.153848	7.11861e-05	0.000883609	620.332	590.897	891.28	948.915
Mbnl3	293.905	1.71925	0.781783	0.228911	7.16581e-05	0.000888717	228.235	186.492	384.891	376.003
Ezh1	861.275	1.49849	0.583513	0.165432	7.22415e-05	0.000895198	592.242	750.023	1102.35	1000.49
Agap2	220.954	0.542092	-0.883391	0.263305	7.23883e-05	0.000896262	258.667	330.416	141.895	152.839
Igfbp6	65.3888	0.345634	-1.53268	0.481084	7.24774e-05	0.000896611	80.7602	121.625	31.0396	28.1299
C1rb	18.5745	14.6471	3.87254	1.1486	7.27562e-05	0.000899303	0	3.04063	32.8133	38.4442
Atp6v0a1	2283.01	1.36477	0.448655	0.122039	7.28234e-05	0.000899378	1782.58	2025.06	2595.8	2728.6
Rgs10	27.6176	0.187694	-2.41354	0.769215	7.36468e-05	0.000908784	40.9653	55.745	5.32107	8.43897
Foxf2	1336.13	1.492	0.577245	0.162399	7.3974e-05	0.000912056	877.829	1215.24	1675.25	1576.21
Rufy1	778.344	1.48881	0.574158	0.16135	7.44134e-05	0.000916705	560.64	660.831	987.059	904.845
Lama5	8650.13	1.29912	0.377533	0.101775	7.47666e-05	0.000920286	7175.96	7713.08	9557.53	10154
Fpgt	798.053	0.685456	-0.544864	0.152505	7.49989e-05	0.000922373	966.782	954.759	603.055	667.616
Psmc4	4442.54	0.750521	-0.414035	0.111511	7.52891e-05	0.000924396	5202.6	5033.26	4005.88	3528.43
Ccl20	689.015	0.67431	-0.568516	0.160133	7.52568e-05	0.000924396	867.295	804.755	522.352	561.66
Tmem44	83.7294	0.401539	-1.31639	0.410745	7.59197e-05	0.000931362	136.941	111.49	45.2291	41.2572
Cetn2	495.11	1.62635	0.701637	0.203507	7.62014e-05	0.000934038	423.699	305.077	607.489	644.175
Pdzd11	983.532	1.42318	0.509114	0.141272	7.66138e-05	0.000937531	822.818	771.308	1168.86	1171.14
Orm3	37.5786	0.255899	-1.96635	0.627322	7.65855e-05	0.000937531	62.0332	62.8398	14.1895	11.252
Cse1l	3218.29	0.748234	-0.418438	0.11347	7.70501e-05	0.000942086	3607.29	3822.08	2590.48	2853.31
Drc1	92.3553	2.45267	1.29435	0.402411	7.72994e-05	0.000944349	40.9653	55.745	149.877	122.834
Ube2s	2667.59	0.712277	-0.489489	0.135622	7.74128e-05	0.00094495	2799.69	3508.89	2295.16	2066.61
CAAA01147332.1	288.708	4.3738	2.12889	0.688739	7.85533e-05	0.00095617	49.1584	125.68	455.839	524.154
Clec2d	2839.44	1.44887	0.534931	0.149752	7.84484e-05	0.00095617	2627.63	1916.61	3199.74	3613.76
Nsdhl	1701.21	1.38758	0.472569	0.130066	7.85998e-05	0.00095617	1326.11	1478.76	1899.62	2100.37
Luc7l2	4762.71	1.38348	0.468307	0.128647	7.84703e-05	0.00095617	4267.42	3605.18	5082.51	6095.75
Tom1l2	1392.69	1.38053	0.465219	0.127839	7.8657e-05	0.00095617	1123.62	1180.78	1628.25	1638.1
Gstm2-ps1	505.525	0.637142	-0.650312	0.187512	8.02057e-05	0.000974191	567.663	691.238	393.759	369.439
S100a6	73001.1	1.31191	0.391674	0.105948	8.02797e-05	0.000974286	61532.3	63421.6	76806.1	90244.5
Rgs11	223.32	0.558465	-0.840462	0.251314	8.0867e-05	0.000980603	310.166	278.725	153.424	150.964
Polr1e	618.96	0.671123	-0.57535	0.16321	8.11031e-05	0.000982657	759.614	745.969	494.86	475.395
Slc17a9	87.7096	2.60101	1.37907	0.43446	8.14341e-05	0.000985044	56.181	31.4199	118.837	144.4
Ubqln4	3401.28	1.36886	0.452977	0.124957	8.14155e-05	0.000985044	2611.25	3043.68	4242.67	3707.52
Rpf2	878.149	0.689319	-0.536756	0.150802	8.16879e-05	0.000987302	1080.31	1028.75	657.153	746.38
Bcar3	853.674	0.671487	-0.574568	0.163072	8.20165e-05	0.00099046	928.158	1147.33	699.721	639.487
Zfp385a	461.481	1.60997	0.687037	0.199749	8.22756e-05	0.00099196	300.803	382.106	616.358	546.658
Chm	774.46	1.47923	0.56485	0.159565	8.22548e-05	0.00099196	662.468	559.477	939.169	936.726
Grhpr	878.634	0.695248	-0.524401	0.147066	8.25989e-05	0.000995042	1074.46	1027.73	732.534	679.806
Dynlrb1	1107.83	0.711717	-0.490624	0.136497	8.37353e-05	0.00100791	1299.19	1321.66	935.622	874.84
Myl12a	3176.02	0.754897	-0.405649	0.110016	8.40649e-05	0.00101105	3782.86	3517	2708.43	2695.78
Lgals3	22054.5	1.29736	0.375578	0.101127	8.42255e-05	0.00101215	20162	17884	25013.5	25158.4
Arfgap3	1867.57	1.35922	0.442776	0.121581	8.46594e-05	0.00101653	1494.65	1627.75	2161.24	2186.63
Slc44a3	950.031	1.48655	0.571964	0.162483	8.48398e-05	0.00101787	658.957	832.12	1087.27	1221.78
Brwd3	436.136	1.59228	0.671095	0.195141	8.50774e-05	0.00101989	354.643	296.969	530.334	562.598
Fam107b	1691.34	0.709256	-0.495622	0.138255	8.51936e-05	0.00102045	1804.82	2202.43	1333.82	1424.31
Atf6	1816.94	0.706545	-0.501147	0.14006	8.52976e-05	0.00102086	1960.48	2352.44	1370.18	1584.65
Ric1	781.154	0.68922	-0.536964	0.151509	8.55639e-05	0.00102322	957.418	919.285	607.489	640.424
Ralgps2	1734.77	0.731457	-0.451155	0.124456	8.64629e-05	0.00103313	1925.37	2124.39	1449.99	1439.31
Tmlhe	391.001	1.5966	0.675004	0.196745	8.71647e-05	0.00103983	301.973	280.752	482.444	498.837
Nfat5	3476.6	1.39301	0.47821	0.132687	8.71164e-05	0.00103983	2883.96	2833.87	3584.63	4603.93
Ablim1	1223.6	1.39432	0.47956	0.133363	8.76071e-05	0.00104426	993.702	1016.59	1393.23	1490.88
Fam172a	677.218	1.49768	0.582732	0.1665	8.90829e-05	0.00106099	484.561	572.653	843.39	808.266
Rnf145	3147.08	0.739156	-0.43605	0.120093	8.94746e-05	0.00106479	3387.25	3922.42	2543.47	2735.16
Rhov	60.9394	2.9282	1.55001	0.495738	9.01318e-05	0.00107158	26.9201	27.3657	80.7029	108.769
Cul4a	2751.56	1.32474	0.405705	0.110744	9.01906e-05	0.00107158	2323.32	2357.51	3224.57	3100.85
Pxk	959.787	1.44115	0.527222	0.148868	9.09666e-05	0.00107993	715.138	825.025	1115.65	1183.33
Cox7a2	5133.56	0.744507	-0.425643	0.117086	9.16471e-05	0.00108713	6342.6	5541.05	4063.53	4587.05
Nacc1	4952.92	1.33205	0.413645	0.114423	9.24669e-05	0.00109597	4095.36	4285.27	6152.93	5278.11
Osbpl7	320.423	1.64824	0.720926	0.213263	9.29276e-05	0.00110054	239.94	226.02	409.723	406.008
Mpp7	314.356	1.66188	0.732818	0.217347	9.33256e-05	0.00110437	236.429	217.912	417.704	385.38
Ipo4	789.051	1.52652	0.610247	0.176297	9.35133e-05	0.00110481	538.402	676.034	1065.99	875.778
Neat1	9648.2	1.3311	0.412618	0.113613	9.34655e-05	0.00110481	8345.22	8002.95	10121.6	12123.1
Hadh	5500.92	0.773434	-0.370649	0.100662	9.39894e-05	0.00110954	6300.47	6197.83	4691.41	4813.96
Inpp5k	805.301	1.48031	0.565898	0.16261	9.45563e-05	0.00111534	566.492	699.346	959.567	995.799
Man2b1	1007.98	1.41178	0.497514	0.139807	9.46769e-05	0.00111587	805.262	836.174	1171.52	1218.96
Slc9a2	157.575	0.501945	-0.994399	0.308224	9.59816e-05	0.00113034	186.1	247.305	98.4399	98.4547
Lhfpl2	997.374	1.44812	0.534181	0.152065	9.63106e-05	0.00113331	855.59	739.888	1273.51	1120.51
Zfp345	257.066	0.564015	-0.826196	0.250367	9.65266e-05	0.00113494	383.904	291.901	181.803	170.655
Rnf44	2800.94	1.3445	0.427072	0.117895	9.73171e-05	0.00114332	2387.69	2330.14	3450.72	3035.22
Nuak1	36.6054	4.28468	2.09919	0.685044	9.9955e-05	0.00117337	8.19307	14.1896	77.1556	46.8832
Cyb5r3	5600.67	1.32135	0.402009	0.111672	0.000100136	0.00117457	4468.73	5054.55	6715.19	6164.2
Ftx	268.44	1.84818	0.886103	0.271726	0.000100243	0.00117488	222.383	134.801	356.512	360.063
Ppp4r3b	2436.77	1.35738	0.440822	0.1225	0.000101067	0.0011836	2159.46	1918.64	2702.22	2966.77
Dnttip2	2644.19	0.740027	-0.43435	0.120644	0.000101202	0.00118423	2912.05	3227.13	2100.94	2336.66
Nudt18	225.839	1.80077	0.848618	0.258742	0.000101808	0.00118849	152.157	154.059	329.907	267.234
Ppp6r2	1044.88	1.4611	0.547057	0.156306	0.000101722	0.00118849	733.865	926.38	1214.98	1304.29
Smad3	2564.53	0.726853	-0.460265	0.128881	0.0001018	0.00118849	2704.88	3302.13	2164.79	2086.3
Eef1g	22575.7	0.767821	-0.381157	0.104325	0.000101972	0.00118945	24086.4	27390	20033.8	18792.7
Tbc1d25	346.679	1.65964	0.730871	0.218341	0.000102754	0.00119725	227.065	273.657	476.236	409.759
Bcas3	380.515	1.64324	0.716542	0.213503	0.000102803	0.00119725	252.815	301.023	530.334	437.889
Mogs	2674.02	1.34634	0.429039	0.118993	0.000102956	0.00119808	2380.67	2119.32	3206.83	2989.27
Glul	5593.05	1.31844	0.398831	0.110673	0.000106194	0.00123479	4935.74	4596.43	6812.75	6027.3
Prodh	1222.62	1.50807	0.592706	0.172446	0.000107123	0.0012446	1090.85	808.809	1658.4	1332.42
Eldr	129.656	2.06919	1.04906	0.330072	0.000108162	0.00125499	71.3967	85.1378	177.369	184.72
Eif3i	7675.1	0.762107	-0.391935	0.108107	0.000108187	0.00125499	9316.69	8252.28	6800.33	6331.1
Fam83h	1355.69	1.42859	0.514591	0.146788	0.000108518	0.00125784	1038.18	1150.37	1779.9	1454.32
Itga7	304.226	1.72027	0.782637	0.237318	0.000108685	0.00125878	190.781	236.156	352.078	437.889
Rbm3	17590	1.36142	0.445113	0.124803	0.000108921	0.00126052	16518.4	12840.6	19670.2	21330.9
Gm807	17.7534	0.103708	-3.2694	1.06391	0.000110638	0.00127938	33.9427	32.4334	0.886846	3.75065
Gstp1	2851.79	0.748279	-0.418352	0.116586	0.000112749	0.00130277	3189.44	3397.4	2539.93	2280.4
Fzd4	103.154	0.421673	-1.2458	0.402495	0.000114596	0.00132307	120.555	181.425	65.6266	45.0078
Chsy3	28.7497	4.93262	2.30235	0.76518	0.000115953	0.00133664	7.02263	8.10836	40.7949	59.0728
Tm9sf2	1918.99	0.730053	-0.453927	0.12819	0.000115921	0.00133664	2068.16	2418.32	1578.59	1610.91
Gabre	33.3844	4.45024	2.15388	0.716214	0.000116405	0.0013408	10.5339	9.1219	41.6817	72.2001
Dcbld1	1481.97	0.73597	-0.442281	0.124541	0.000118117	0.00135946	1717.03	1734.18	1238.04	1238.65
Slc43a3	3086.38	1.35591	0.439257	0.123511	0.000118347	0.00136104	2349.07	2815.63	3498.61	3682.2
Gipc1	2732.07	1.41542	0.50123	0.143376	0.000118458	0.00136125	2474.31	1966.28	3550.93	2936.76
Spcs2	2702.25	0.755317	-0.404846	0.112837	0.000119346	0.00137038	3008.03	3204.83	2344.82	2251.33
Hoxc4	53.0913	3.13065	1.64646	0.545924	0.000121035	0.00138869	28.0905	16.2167	78.0424	90.0157
Itih5	576.846	1.53414	0.617431	0.18254	0.000121394	0.00139173	413.165	470.285	644.737	779.198
Trpm6	72.7145	2.69361	1.42954	0.470005	0.000121705	0.00139318	44.4767	25.3386	118.837	102.205
Ankrd13b	1403.6	1.40226	0.487756	0.139333	0.00012171	0.00139318	1123.62	1171.66	1803.84	1515.26
Ccs	594.735	1.58281	0.662489	0.198176	0.000121893	0.00139418	523.186	367.917	707.703	780.136
Creb3l3	51.464	0.312909	-1.67618	0.55896	0.000123369	0.00140997	98.3168	65.8804	25.7185	15.9403
Chmp2b	2170.28	1.35681	0.440219	0.124159	0.000123667	0.00141228	1753.32	1877.08	2364.33	2686.41
Zfp300	27.2607	5.02761	2.32987	0.776966	0.000124116	0.00141631	7.02263	7.09481	45.2291	49.6962
Tulp2	49.9404	0.31693	-1.65776	0.552441	0.000124267	0.00141694	64.3741	94.2597	18.6238	22.5039
Rasgrf2	20.451	0.139792	-2.83865	0.949041	0.000126239	0.0014383	26.9201	47.6366	4.43423	2.81299
Echdc3	327.005	1.62987	0.70476	0.213396	0.000126629	0.00144058	252.815	226.02	420.365	408.821
Aftph	2000.79	1.34124	0.423572	0.119132	0.000126634	0.00144058	1624.57	1748.36	2339.5	2290.71
Sinhcaf	2250.6	0.747869	-0.419142	0.117856	0.000126732	0.00144058	2587.84	2612.92	1990.08	1811.57
Il1f6	29.7759	5.65326	2.49908	0.836231	0.000128145	0.00145502	1.17044	12.1625	52.3239	53.4468
Rcbtb2	549.286	1.57769	0.657813	0.197392	0.0001282	0.00145502	475.198	349.673	728.1	644.175
Zfp229	263.294	0.574165	-0.800462	0.247833	0.000128633	0.0014588	390.926	296.969	187.124	178.156
Pak3	14.8662	0.0524359	-4.2533	1.30703	0.000132339	0.00149967	29.261	28.3793	0.886846	0.937664
Mras	486.359	0.655419	-0.60951	0.181414	0.000132726	0.0015029	570.003	627.384	363.607	384.442
Psat1	11008.4	0.772733	-0.371958	0.103447	0.000132978	0.00150459	11814.4	13212.6	9718.05	9288.49
Timm44	1620.72	1.3502	0.433178	0.122668	0.0001333	0.00150592	1382.29	1337.88	1900.51	1862.2
Dmxl2	31.4729	0.214556	-2.22057	0.756049	0.000133248	0.00150592	44.4767	63.8533	4.43423	13.1273
Tyms	2019.68	0.746167	-0.42243	0.119539	0.00013594	0.00153457	2423.98	2249.06	1667.27	1738.43
Slc38a10	4777.71	1.30113	0.379766	0.106196	0.000139374	0.00157212	4234.65	3985.26	5629.7	5261.23
Blvrb	1303.3	1.37913	0.463755	0.132988	0.000139723	0.00157485	1079.14	1076.38	1604.3	1453.38
F8	46.0089	3.24821	1.69965	0.571862	0.000141283	0.00159001	16.3861	20.2709	78.9293	68.4494
Ldlrad3	517.68	0.664359	-0.589965	0.17558	0.000141181	0.00159001	626.184	640.56	385.778	418.198
Slco1a6	17.1201	18.0736	4.17581	1.29718	0.000142217	0.00159929	2.34088	0	23.9448	42.1949
Arhgef6	22.137	6.61116	2.7249	0.913474	0.000142656	0.001603	2.34088	6.08127	41.6817	38.4442
Cct2	9059.4	0.758922	-0.397977	0.112683	0.000144589	0.00162348	9518	11275.7	7942.59	7501.31
Strn3	2105.2	0.745194	-0.424312	0.120721	0.00014495	0.00162523	2433.34	2440.62	1675.25	1871.58
Baiap2l1	1847.36	0.738016	-0.438276	0.125201	0.000144966	0.00162523	2049.44	2248.04	1611.4	1480.57
Traip	937.372	0.710258	-0.493585	0.1431	0.000146629	0.00164262	1093.19	1128.08	788.406	739.817
Etnk1	3614.07	1.3462	0.42889	0.122637	0.000146864	0.00164394	3210.51	2862.25	3863.99	4519.54
Ak2	3255.2	0.759259	-0.397336	0.112307	0.00014697	0.00164394	3929.16	3539.3	2774.05	2778.3
Ranbp10	1014.67	1.481	0.566571	0.168001	0.000147211	0.00164538	682.365	911.177	1308.98	1156.14
Gm49331	14.6912	0.0535234	-4.22369	1.31481	0.000148185	0.00165502	31.6018	25.3386	0.886846	0.937664
Rap2c	1448.05	1.41442	0.500206	0.145585	0.000148703	0.00165954	1316.74	1036.86	1731.12	1707.49
Cdc25b	2326.45	1.34019	0.422432	0.120306	0.000149683	0.00166921	1836.42	2085.88	2693.35	2690.16
Slc43a2	504.099	0.632453	-0.66097	0.201415	0.000149855	0.00166986	673.002	589.883	431.894	321.619
Sec16b	1517.29	0.720695	-0.47254	0.136809	0.000150398	0.00167464	1901.96	1670.32	1327.61	1169.27
Sema5a	64.2822	0.369607	-1.43594	0.483756	0.00015116	0.00168185	88.9533	107.436	36.3607	24.3793
Fuca1	1354.16	1.3649	0.448792	0.128958	0.00015182	0.00168665	1118.94	1136.18	1624.7	1536.83
Capns1	10751.8	1.26938	0.344129	0.0958354	0.000151716	0.00168665	9258.17	9536.44	12218.1	11994.6
1810030O07Rik	792.833	1.46532	0.551212	0.163532	0.000153585	0.00170368	606.287	648.669	1050.91	865.463
Naprt	168.987	0.508015	-0.977058	0.316638	0.000153514	0.00170368	280.905	183.452	103.761	107.831
Nkrf	318.383	1.66445	0.735044	0.227913	0.000154532	0.00171227	197.804	259.467	416.817	399.445
Tcf4	857.315	1.41737	0.503217	0.147197	0.000154592	0.00171227	718.649	671.98	1011.89	1026.74
Usp44	9.68908	0.834416	-0.261161	0.50906	0.000154731	0.00171252	9.36351	29.3928	0	0
Zbed3	592.55	1.52017	0.604237	0.181797	0.000156675	0.00173273	403.801	508.799	760.914	696.684
Mrpl57	896.659	1.46725	0.553116	0.164515	0.000157199	0.00173722	801.75	617.249	1100.58	1067.06
Muc4	53.0742	3.03146	1.60001	0.54337	0.000158039	0.00174519	17.5566	27.3657	73.6082	93.7664
Nop9	1621.26	1.3473	0.430068	0.123311	0.000158783	0.0017521	1323.77	1399.71	1871.24	1890.33
Oaf	2606.61	0.720195	-0.473541	0.137943	0.000160494	0.00176965	3464.5	2675.76	2190.51	2095.68
Rnf7	1879.71	0.725004	-0.463939	0.134692	0.000160619	0.00176969	2428.66	1984.52	1568.83	1536.83
Ktn1	1315.52	1.43488	0.520932	0.153661	0.000161212	0.00177357	955.078	1158.48	1426.05	1722.49
Map4k3	1294.32	0.728585	-0.456832	0.132372	0.000161162	0.00177357	1585.94	1445.31	1068.65	1077.38
Prelid3b	1228.2	0.724292	-0.465356	0.135189	0.000161368	0.00177397	1499.33	1385.52	1050.91	977.045
Slc25a33	322.975	0.603861	-0.727712	0.226792	0.00016269	0.00178716	360.495	465.217	226.146	240.042
Fdxr	488.86	1.55197	0.634101	0.193341	0.000165024	0.00181144	393.267	348.659	667.795	545.72
H2-T23	2320.83	1.42041	0.506309	0.149157	0.000165733	0.00181787	2178.19	1580.12	2759.86	2765.17
Cx3cl1	2433.87	0.750804	-0.413493	0.118504	0.000166509	0.00182502	2653.38	2961.58	2103.6	2016.91
Sptbn1	7647.61	1.35156	0.434625	0.125938	0.000166765	0.00182647	5621.61	7184.01	8588.21	9196.6
Rbbp4	9901.68	0.783992	-0.351089	0.098778	0.000167285	0.0018308	11439.9	10916.9	8382.46	8867.48
Zfp532	17.761	0.125479	-2.99449	1.02836	0.00016879	0.0018459	35.1131	30.4063	1.77369	3.75065
Acap3	627.044	1.47062	0.556423	0.166267	0.000169071	0.00184622	464.664	525.016	761.8	756.694
Nelfcd	1374.89	0.734255	-0.445646	0.129226	0.000169015	0.00184622	1642.12	1565.93	1180.39	1111.13
Gabarap	7980.87	1.28564	0.362487	0.102363	0.000169729	0.00185203	6624.68	7208.33	9259.55	8830.92
Sh3bgrl	3790.01	2.14584	1.10154	0.368023	0.000170069	0.00185437	2715.42	1683.5	5145.48	5615.67
Upf3b	619.175	1.51291	0.597327	0.180867	0.000170298	0.00185549	529.038	428.729	705.042	813.892
Zfp282	1399.87	1.36202	0.445748	0.128902	0.000170944	0.00186115	1170.44	1164.56	1693.88	1570.59
Naa10	1119.68	1.49627	0.581367	0.175512	0.000171119	0.00186168	1018.28	727.725	1482.81	1249.91
Pfdn4	1485.97	0.722565	-0.4688	0.137014	0.000171398	0.00186334	1875.04	1619.64	1161.77	1287.41
Tusc1	203.925	1.79819	0.846549	0.27096	0.000171966	0.00186813	124.066	151.018	252.751	287.863
Zfp951	292.394	1.63725	0.711274	0.221748	0.000172321	0.00187061	218.872	206.763	369.815	374.128
Atp6v0b	4172.55	0.73923	-0.435905	0.126343	0.000173449	0.00188146	5403.91	4300.47	3497.72	3488.11
Anks1b	64.5535	0.363492	-1.46	0.500811	0.000173633	0.00188207	112.362	86.1513	38.1344	21.5663
Nagk	1585.22	1.40487	0.490434	0.143693	0.000173767	0.00188213	1436.13	1153.41	1967.91	1783.44
Snx20	95.1067	0.438611	-1.18899	0.399797	0.000175054	0.00189468	112.362	163.181	51.437	53.4468
Coq10b	387.504	0.63815	-0.648032	0.19964	0.00017575	0.00190081	459.982	506.772	277.583	305.678
Wdr41	821.724	1.45079	0.536841	0.161403	0.000176164	0.0019039	628.525	679.075	1081.95	897.344
Klhl2	1748.78	0.738826	-0.436694	0.12665	0.000176476	0.00190586	2160.63	1907.49	1479.26	1447.75
Dhrs4	710.501	1.49845	0.583473	0.176648	0.000176802	0.00190799	620.332	486.502	924.093	811.079
Syngr1	518.91	0.664111	-0.590504	0.179398	0.000177502	0.00191413	676.513	594.951	415.044	389.13
Setd1b	1122.86	1.3915	0.476638	0.139993	0.00017773	0.00191518	875.488	967.935	1373.72	1274.28
Slc9a6	500.635	1.55422	0.636187	0.195302	0.00017808	0.00191727	430.721	328.389	603.942	639.487
Tle3	1979.44	0.71681	-0.480338	0.141441	0.000178184	0.00191727	2134.88	2538.93	1773.69	1470.26
Zfp534	27.0793	4.84397	2.27619	0.793913	0.000178414	0.00191832	9.36351	5.06772	47.0028	46.8832
Vnn3	333.371	0.621727	-0.685647	0.213561	0.000178543	0.00191832	452.96	389.201	245.656	245.668
Hmgb3	2256	1.33094	0.41245	0.118727	0.000178772	0.00191939	2000.28	1821.34	2663.2	2539.19
Igf2r	76.8056	0.418688	-1.25605	0.426126	0.000179924	0.00193035	106.51	119.598	40.7949	40.3195
[truncated: 22,694 more rows]

## Sheet: DEG sgScaf1 FDR 0.05 log2 FC
Gene	baseMean	Fold_Change	log2FoldChange	lfcSE	pvalue	padj	...sgLUC_1_S1.sorted.bam	...sgLUC_2_S2.sorted.bam	...sgSCAF1_1_S5.sorted.bam	...sgSCAF1_2_S6.sorted.bam
[truncated: 625 more rows]

[truncated: 4 more sheets: gsea_sgUsp15 downregulated, gsea_sgUsp15 upregulated, gsea_sgScaf1 downregulated, gsea_sgScaf1 upregulated]
